# Supplementary material
Source: PubMed Central journal article supplement (PMC6504239)
Supplement: NIHMS1025007-supplement-Supplemental.pdf [file NIHMS1025007-supplement-Supplemental.pdf]

Supplementary Materials for  
**Ketyl Radical Reactivity via Atom Transfer Catalysis**

**Lu Wang, Jeremy M. Lear, Sean M. Rafferty, Stacy C. Fosu, David A. Nagib\***

Department of Chemistry and Biochemistry, The Ohio State University  
151 W Woodruff Ave., Columbus, OH, 43210, United States

\*Corresponding author. E-mail: nagib.1@osu.edu

**This PDF file includes:**

Materials and Methods

Supplementary Text

Figures S1 to S9

Tables S1 to S4

NMR Spectra

References (41-60)

| <b>Contents:</b>                                                                   | <b>Pages</b> |
|------------------------------------------------------------------------------------|--------------|
| <a href="#">General Methods</a>                                                    | S3           |
| <a href="#">Synthesis and characterization of acyl iodides</a>                     | S3           |
| <a href="#">Synthesis and characterization of aldehydes</a>                        | S4-S8        |
| <a href="#">Synthesis and characterization of alkynes</a>                          | S8-S13       |
| <a href="#">Optimization</a>                                                       | S14          |
| <a href="#">Synthesis and characterization of vinyl iodides</a>                    | S15-S33      |
| <a href="#">Procedure for the synthesis of <math>\alpha</math>-acetoxy halides</a> | S34          |
| <a href="#">Cyclic voltammograms</a>                                               | S35          |
| Mechanistic investigations                                                         | S36-S41      |
| a. <a href="#">Origin of Z-selectivity: time study and isomerization</a>           |              |
| b. <a href="#">Polarity of ketyl radical</a>                                       |              |
| c. <a href="#">Catalyst turnover</a>                                               |              |
| d. <a href="#">Cascade reactions</a>                                               |              |
| e. <a href="#">Unlikely propagation pathway</a>                                    |              |
| <a href="#">Synthetic manipulation of vinyl iodide</a>                             | S42-S45      |
| <a href="#">Computational studies</a>                                              | S46-S51      |
| <a href="#">NMR spectra of new compounds</a>                                       | S52-S111     |
| <a href="#">NOE spectra of new compounds</a>                                       | S112-S114    |
| <a href="#">References</a>                                                         | S115         |

## Experimental section

**General Methods.** Unless noted, all commercial reagents were used as purchased without further purification, and all reactions were carried out under nitrogen. Silicycle F60 (230-400 mesh) silica gel or a CombiFlash® Automated Flash Chromatograph was used for flash column chromatography. Thin layer chromatography (TLC) analyses were performed using Merck silica gel 60 F<sub>254</sub> plates and visualized under UV or phosphomolybdic acid stain. <sup>1</sup>H and <sup>13</sup>C NMR spectra were recorded using a Bruker AVIII 400 or AVIII 600 MHz NMR spectrometer and are reported as chemical shifts (δ ppm), multiplicity (s = singlet, br = broad, d = doublet, dd = doublet of doublets, t = triplet, q = quartet, m = multiplet), coupling constant (Hz), relative integral. <sup>1</sup>H NMR spectra were referenced with respect to CDCl<sub>3</sub> (δ = 7.26 ppm) or DMSO-*d*<sub>6</sub> (δ = 2.54 ppm) as internal references and <sup>13</sup>C NMR spectra were referenced with respect to CDCl<sub>3</sub> (δ = 77.00 ppm) as an internal reference. High resolution mass spectra were obtained using Bruker MicrOTOF (ESI). IR spectra were recorded using a Thermo Fisher Nicolet iS10 FT-IR and are reported in terms of frequency of absorption (cm<sup>-1</sup>).

### General procedure for the synthesis of acyl iodides:

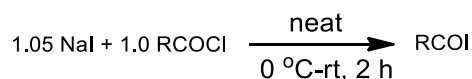

To a round-bottom flask was added sodium iodide (1.05 equiv.) and the corresponding acyl chloride (1.0 equiv.) at 0 °C. Then the reaction was warmed up to room temperature and stirred further for 2 hours, after which the reaction mixture was filtered to remove sodium chloride. The crude product was purified by distillation and the pure product was stored in the freezer.

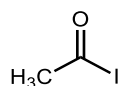

**Acetyl iodide.** Distillation at 140 °C under 1 atm afforded the title product in 51% yield as a yellow liquid. <sup>1</sup>H NMR (CDCl<sub>3</sub>, 600 MHz): δ 2.97 (s, 3H); <sup>13</sup>C NMR (CDCl<sub>3</sub>, 150 MHz): δ 47.24, 156.07. The spectroscopic data is in agreement with the National Institute of Advanced Industrial Science and Technology (AIST).

**General procedure for the synthesis of aldehydes 28-SM, 29-SM, 32-SM: (41)**

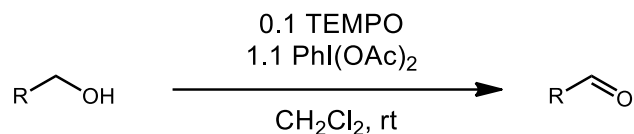

To a dry round-bottom flask, the respective alcohol (1.0 equiv.), CH<sub>2</sub>Cl<sub>2</sub>, and TEMPO (0.1 equiv.) were added and stirred until dissolution. To the stirring solution, iodobenzene diacetate (1.1 equiv.) was added and the reaction stirred at room temperature until the consumption of the starting alcohol (monitored by TLC). After completion, the reaction was diluted with CH<sub>2</sub>Cl<sub>2</sub> and washed with saturated Na<sub>2</sub>S<sub>2</sub>O<sub>3</sub> solution, then saturated NaHCO<sub>3</sub> solution, and saturated brine solution. The combined organic extracts were dried over Na<sub>2</sub>SO<sub>4</sub>. Then the solvent was removed under vacuum and the crude product was purified by column chromatography on silica gel.

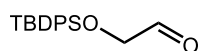

**28-SM**

**2-((*tert*-Butyldiphenylsilyloxy)acetaldehyde.** Column chromatography on silica gel (eluent: hexanes/ethyl acetate = 5.7:1) afforded the title product in 68% yield as a white solid. <sup>1</sup>H NMR (CDCl<sub>3</sub>, 600 MHz): δ 1.12 (s, 9H), 4.23 (s, 2H), 7.39-7.42 (m, 4H), 7.44-7.47 (m, 2H), 7.67 (d, *J* = 6.7 Hz, 4H), 9.73 (s, 1H); <sup>13</sup>C NMR (CDCl<sub>3</sub>, 150 MHz): δ 19.40, 26.86, 70.15, 128.05, 130.19, 132.70, 135.65, 201.67. R<sub>f</sub> = 0.64 (25% ethyl acetate/75% hexanes). The spectroscopic data is in agreement with that previously reported. (42)

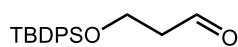

**29-SM**

**3-((*tert*-Butyldiphenylsilyloxy)propanal.** Column chromatography on silica gel (eluent: hexanes/ethyl acetate = 5.7:1) afforded the title product in 40% yield as a white solid. <sup>1</sup>H NMR (CDCl<sub>3</sub>, 600 MHz): δ 1.04 (s, 9H), 2.60 (td, *J* = 9.0, 2.2 Hz, 2H), 4.02 (t, *J* = 6.0 Hz, 2H), 7.38-7.41 (m, 4H), 7.43-7.45 (m, 2H), 7.66 (dm, *J* = 6.5 Hz, 4H), 9.82 (t, *J* = 2.2 Hz, 1H); <sup>13</sup>C NMR (CDCl<sub>3</sub>, 150 MHz): δ 19.30, 26.92, 46.55, 58.48, 127.91, 129.95, 133.46, 135.70, 201.88. R<sub>f</sub> = 0.41 (10% ethyl acetate/90% hexanes). The spectroscopic data is in agreement with that previously reported. (43)

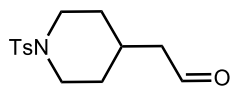

**32-SM**

**2-(1-Tosylpiperidin-4-yl)acetaldehyde.** Column chromatography on silica gel (eluent: hexanes/ethyl acetate = 1.5:1) afforded the title product in 84% yield as a white solid.  $^1\text{H NMR}$  ( $\text{CDCl}_3$ , 600 MHz):  $\delta$  1.36 (qd,  $J = 25.1, 12.2, 4.1$  Hz, 2H), 1.75 (dm,  $J = 14.0$  Hz, 2H), 1.78-1.85 (m, 1H), 2.25 (td,  $J = 18, 2.5$  Hz, 2H), 2.37 (dd,  $J = 6.7, 1.4$  Hz, 2H), 2.43 (s, 3H), 3.75 (d,  $J = 11.8$  Hz, 2H), 7.32 (d,  $J = 7.9$  Hz, 2H), 7.62 (d,  $J = 8.2$  Hz, 2H), 9.72 (t,  $J = 1.4$  Hz, 1H);  $^{13}\text{C NMR}$  ( $\text{CDCl}_3$ , 150 MHz):  $\delta$  21.63, 29.84, 31.42, 46.29, 49.99, 127.85, 129.74, 133.35, 143.63, 200.94.  $R_f = 0.39$  (50% ethyl acetate/50% hexanes). The spectroscopic data is in agreement with that previously reported. (41)

**Procedure for the synthesis of aldehyde 34-SM:**

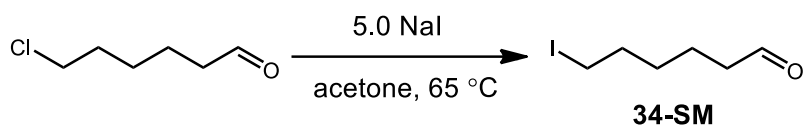

**6-Iodohexanal.** 6-Chlorohexanal (404 mg, 3 mmol) was added to a solution of NaI (2.25 g, 15 mmol) in acetone (10 mL) and the reaction was stirred at 50 °C for 10 h. Then the reaction mixture was diluted with  $\text{Et}_2\text{O}$ , washed with aqueous  $\text{Na}_2\text{S}_2\text{O}_3$  solution and brine. The combined organic extracts were dried with  $\text{Na}_2\text{SO}_4$  and concentrated to provide the pure iodide (532 mg, 78%) as a pale yellow oil.  $^1\text{H NMR}$  ( $\text{CDCl}_3$ , 400 MHz):  $\delta$  1.38-1.49 (m, 2H), 1.65 (m, 2H), 1.84 (m, 2H), 2.45 (dt,  $J = 1.56, 10.88$  Hz, 2H), 3.19 (t,  $J = 6.90$  Hz, 2H), 9.77 (t,  $J = 1.56$  Hz, 1H);  $^{13}\text{C NMR}$  ( $\text{CDCl}_3$ , 150 MHz):  $\delta$  6.52, 21.05, 30.06, 33.24, 43.73, 202.25. The spectroscopic data is in agreement with that previously reported. (44)

**Procedure for the synthesis of aldehyde 44: (45)**

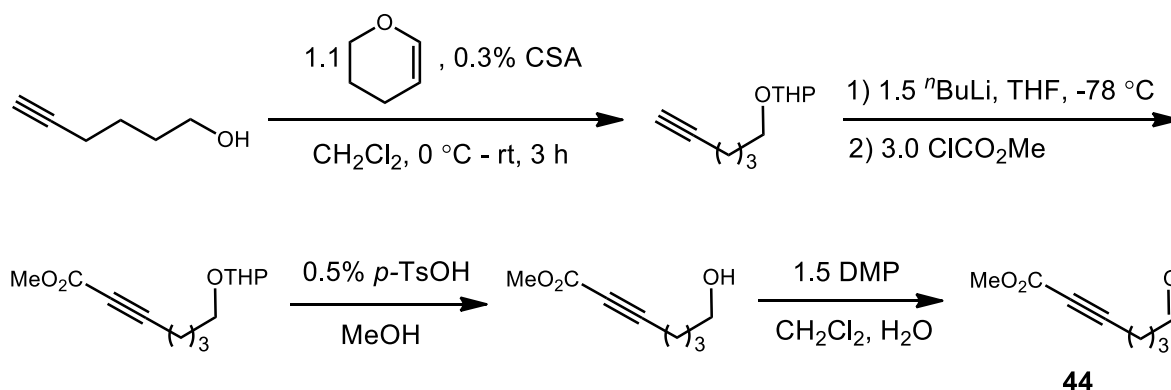

**44**

All the spectroscopic data are in agreement with that previously reported. (45)

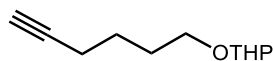

**1-Hex-5-ynoxy-tetrahydro-pyran.** CSA (7 mg, 0.03 mmol) was added to a solution of hexynol (2.5 mL, 22.8 mmol) and 3,4-dihydro-2*H*-pyran (2.3 mL, 25 mmol) in DCM at 0 °C. The reaction was warmed to room temperature and stirred for 4 hours. Then the reaction was quenched with saturated aqueous NaHCO<sub>3</sub> and the aqueous layer was extracted with CH<sub>2</sub>Cl<sub>2</sub>. The combined organic extracts were dried over Na<sub>2</sub>SO<sub>4</sub> and concentrated to provide the product as colorless oil quantitatively. <sup>1</sup>H NMR (CDCl<sub>3</sub>, 400 MHz): δ 1.48-1.74 (m, 10H), 1.77-1.87 (m, 1H), 1.93 (t, *J* = 2.56 Hz, 1 H), 2.21 (td, *J* = 2.56, 6.91 Hz, 2H), 3.37-3.42 (m, 1H), 3.46-3.51 (m, 1H), 3.71-3.77 (m, 1H), 3.82 (m, 1 H), 4.56 (t, *J* = 3.38 Hz, 1 H); <sup>13</sup>C NMR (CDCl<sub>3</sub>, 100 MHz): δ 18.37, 19.73, 25.47, 25.61, 28.93, 30.85, 62.39, 67.01, 68.46, 84.49, 98.91.

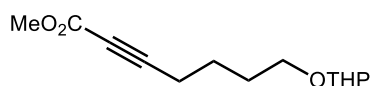

**Methyl 7-((tetrahydro-2*H*-pyran-2-yl)oxy)hept-2-ynoate.** <sup>n</sup>BuLi (24.4 mL, 34.2 mmol, 1.4 M in hexane) was added to a solution of alkyne (4.2 g, 22.8 mmol) in THF (20 mL) at 0 °C over 30 min. After stirring 2 hours, the mixture was syringed into a solution of methyl chloroformate (5.29 mL, 68.4 mmol) in THF (5 mL) over 30 minutes, while maintaining a temperature between -25 and -35 °C. The reaction was stirred for 30 minutes at -35 °C. The cooling bath was then removed and the reaction was stirred for an additional 1 h at room temperature. The reaction was carefully quenched with aqueous NH<sub>4</sub>Cl and extracted with Et<sub>2</sub>O. The combined organic extracts were dried over Na<sub>2</sub>SO<sub>4</sub> and concentrated. The crude product was purified by column chromatography (eluent: hexanes/ethyl acetate = 95:5) to yield the pure product as a colorless oil (5.06 g, 92%). <sup>1</sup>H NMR (CDCl<sub>3</sub>, 400 MHz): δ 1.53-1.63 (m, 5H), 1.69-1.77 (m, 5H), 1.80-1.87 (m, 1H), 2.39-2.44 (m, 2H), 3.40-3.46 (m, 1H), 3.50- 3.55 (m, 1H), 3.76-3.82 (m, 1H), 3.78 (s, 3H), 3.85-3.90 (m, 1H), 4.58-4.60 (m, 1H); <sup>13</sup>C NMR (CDCl<sub>3</sub>, 100 MHz): δ 18.66, 19.76, 24.67, 25.60, 28.99, 30.85, 52.69, 62.49, 66.82, 73.17, 89.70, 99.02, 154.38.

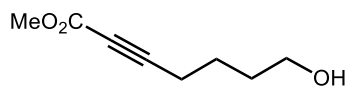

**Methyl 7-hydroxyhept-2-ynoate.** The THP-protected alkyne (5.06 g, 21.05 mmol) and *p*-TsOH (21mg,

0.11 mmol) were stirred in MeOH at room temperature for 15 hours. The reaction was quenched with saturated aqueous NaHCO<sub>3</sub> and methanol was removed under reduced pressure. The product was extracted with Et<sub>2</sub>O and CH<sub>2</sub>Cl<sub>2</sub>. The combined organic layers were washed with brine, dried over Na<sub>2</sub>SO<sub>4</sub> and concentrated. The crude product was purified by column chromatography (eluent: hexanes/ethyl acetate = 70:30) to provide the desired alcohol (711 mg, 21%). <sup>1</sup>H NMR (CDCl<sub>3</sub>, 400 MHz): δ 1.39 (br, 1.39, 1H), 1.67-1.70 (m, 4H), 2.37-2.41 (m, 2H), 3.68 (br, 2H), 3.75 (s, 3H); <sup>13</sup>C NMR (CDCl<sub>3</sub>, 100 MHz): δ 18.59, 24.03, 31.76, 52.71, 62.26, 73.29, 89.50, 154.35.

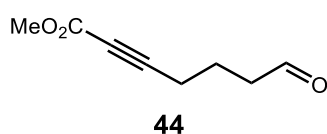

**Methyl 7-oxohept-2-ynoate.** DMP (2.05 g, 5 mmol) was added to a solution of alcohol (503 mg, 3.22 mmol) in CH<sub>2</sub>Cl<sub>2</sub> (30 mL). The mixture of CH<sub>2</sub>Cl<sub>2</sub> (30 mL) and H<sub>2</sub>O (0.13 mL) was added via addition funnel (~1 drop/sec). The reaction was stirred for 30 minutes. The reaction was then diluted with Et<sub>2</sub>O (50 mL) and concentrated. The obtained slurry was filtered, washed with Et<sub>2</sub>O (30 mL) and then concentrated. Column chromatography (eluent: hexanes/ethyl acetate = 95:5 to 90:10) afforded the title product (282 mg, 40%) as a pale yellow oil. <sup>1</sup>H NMR (CDCl<sub>3</sub>, 400 MHz): δ 1.89 (m, 2H), 2.41 (t, *J* = 6.90 Hz, 2H), 2.61 (t, *J* = 6.90 Hz, 2H), 3.75 (s, 3H), 9.78 (s, 1H); <sup>13</sup>C NMR (CDCl<sub>3</sub>, 150 MHz): δ 18.05, 20.02, 42.43, 52.73, 73.80, 88.21, 154.12, 201.06.

**Procedure for the synthesis of aldehyde 46: (46)**

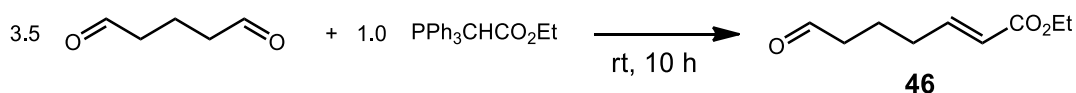

**(E)-Ethyl 7-oxohept-2-enoate.** According to the known procedure, to a solution of glutaraldehyde (3.5 g, 35 mmol) in CH<sub>2</sub>Cl<sub>2</sub> (15 mL) was added a solution of (carbethoxymethylene)triphenylphosphorane (3.48 g, 10 mmol) in CH<sub>2</sub>Cl<sub>2</sub> (20 mL) via syringe pump (2 mL/h) at room temperature. Then the solvent was removed under vacuum and the crude product was purified by column chromatography on silica gel (eluent: hexanes/ethyl acetate = 50:1 to 20:1 to 10:1) to afford the title product in 59% yield as a colorless oil. <sup>1</sup>H NMR (CDCl<sub>3</sub>, 400 MHz): δ 1.29 (t, *J* = 7.2 Hz, 3H), 1.77-1.85 (m, 2 H), 2.25 (dq, *J* = 7.2, 1.6 Hz, 2H), 2.48 (dt, *J* = 7.2, 1.6 Hz, 2H), 4.19 (q, *J* = 6.8 Hz, 2H), 5.84 (dt, *J* = 15.6, 1.6 Hz, 1H),

6.91 (dt,  $J = 15.6, 7.2$  Hz, 1H), 9.78 (t,  $J = 1.6$  Hz, 1H). The spectroscopic data is in agreement with that previously reported. (46)

**General procedure for the synthesis of alkynes 17-SM, 19-SM, 21-SM, 22-SM, 38-SM, 41-SM, 42-SM, 43-SM:** (47)

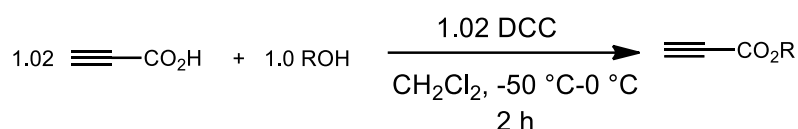

To the solution of alcohol (1.0 equiv.) in  $\text{CH}_2\text{Cl}_2$  was added propiolic acid (1.02 equiv.) and DCC (1.02 equiv.) at  $-50^\circ\text{C}$ . The reaction was warmed up to  $0^\circ\text{C}$  and stirred at  $0^\circ\text{C}$  for 2 hours and then the reaction mixture was filtered. Then the solvent was removed under vacuum and the crude product was purified by column chromatography on silica gel.

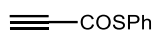

#### 17-SM

**S-Phenyl prop-2-ynethioate.** Column chromatography on silica gel (eluent: hexanes/ethyl acetate = 50:1) afforded the title product in 86% yield as a pale yellow oil.  $^1\text{H}$  NMR ( $\text{CDCl}_3$ , 400 MHz):  $\delta$  3.40 (s, 1H), 7.45-7.47 (m, 5H);  $^{13}\text{C}$  NMR ( $\text{CDCl}_3$ , 150 MHz):  $\delta$  78.82, 81.09, 126.06, 129.45, 130.23, 134.54, 174.91.  $R_f = 0.5$  (10% ethyl acetate/90% hexanes). The spectroscopic data is in agreement with that previously reported. (48)

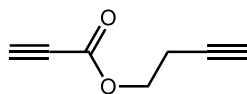

#### 19-SM

**But-3-yn-1-yl propiolate.** Extra 5% DMAP was used as a catalyst. Column chromatography on silica gel (eluent: hexanes/ethyl acetate = 50:1) afforded the title product in 34% yield as a pale yellow oil.  $^1\text{H}$  NMR ( $\text{CDCl}_3$ , 400 MHz):  $\delta$  2.03 (t,  $J = 2.8$  Hz, 1H), 2.59 (dt,  $J = 6.8, 2.8$  Hz, 2H), 2.91 (s, 1H), 4.31 (t,  $J = 6.8$  Hz, 2H).  $R_f = 0.5$  (10% ethyl acetate/90% hexanes). The spectroscopic data is in agreement with that previously reported. (49)



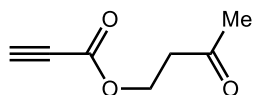

**21-SM**

**3-Oxobutyl propiolate.** Extra 10% DMAP was used as a catalyst. Column chromatography on silica gel (eluent: hexanes/ethyl acetate = 7:1-4:1) afforded the title product in 54% yield as a pale yellow oil.  $^1\text{H}$  NMR ( $\text{CDCl}_3$ , 400 MHz):  $\delta$  2.20 (s, 3H), 2.82 (t,  $J = 6.4$  Hz, 2H), 2.88 (s, 1H), 4.45 (t,  $J = 6.4$  Hz, 2H).  $R_f = 0.4$  (20% ethyl acetate/80% hexanes). The spectroscopic data is in agreement with that previously reported. (50)

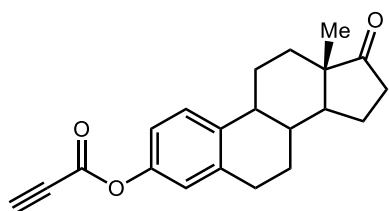

**22-SM**

**(13S)-13-Methyl-17-oxo-7,8,9,11,12,13,14,15,16,17-decahydro-6H-cyclopenta[*a*]phenanthren-3-yl propiolate.** Extra 3% DMAP was used as a catalyst. Column chromatography on silica gel (eluent: hexanes/ethyl acetate = 10:1-8:1) afforded the title product in 31% yield as a light yellow solid.  $^1\text{H}$  NMR ( $\text{CDCl}_3$ , 400 MHz):  $\delta$  0.91 (s, 3H), 1.40-1.68 (m, 6H), 1.95-2.19 (m, 4H), 2.26-2.32 (m, 1 H), 2.38-2.43 (m, 1H), 2.51 (dd,  $J = 18.4, 8.4$  Hz, 1H), 2.92 (dd,  $J = 8.4, 4.0$  Hz, 1H), 3.06 (s, 1H), 6.87 (d,  $J = 2.8$  Hz, 1H), 6.91 (dd,  $J = 8.1, 2.4$  Hz, 1H), 7.30 (d,  $J = 8.0$  Hz, 1H);  $^{13}\text{C}$  NMR ( $\text{CDCl}_3$ , 100 MHz):  $\delta$  13.78, 21.55, 25.69, 26.23, 29.34, 31.50, 35.80, 37.90, 44.11, 47.88, 50.39, 74.32, 76.59, 118.33, 121.16, 126.56, 138.22, 138.31, 147.65, 151.22, 220.64. IR (film): 3202, 2930, 2861, 2109, 1726, 1489, 1192, 1179, 908, 738  $\text{cm}^{-1}$ ; HRMS (ESI) for  $\text{C}_{21}\text{H}_{22}\text{O}_3\text{Na}$   $[\text{M}+\text{Na}]^+$ : calcd 345.1467, found 345.1451.  $R_f = 0.42$  (20% ethyl acetate/80% hexanes).

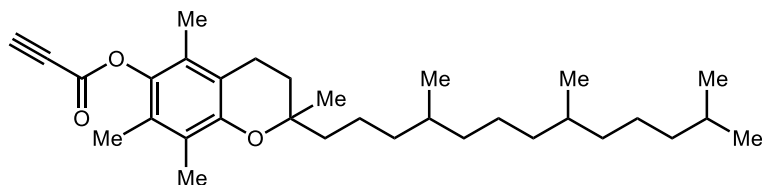

**38-SM**

**2,5,7,8-Tetramethyl-2-(4,8,12-trimethyltridecyl)chroman-6-yl propiolate.** Extra 2% DMAP was used

as a catalyst. Column chromatography on silica gel (eluent: hexanes/ethyl acetate = 100:1-50:1) afforded the title product in 50% yield as a colorless oil.  $^1\text{H}$  NMR ( $\text{CDCl}_3$ , 600 MHz):  $\delta$  0.84-0.87 (m, 12H), 1.04-1.15 (m, 6H), 1.21-1.47 (m, 15H), 1.49-1.59 (m, 3H), 1.73-1.84 (m, 2H), 2.01 (s, 3H), 2.05 (s, 3H), 2.09 (s, 3H), 2.59 (t,  $J = 6.6$  Hz, 2H), 3.04 (s, 1H);  $^{13}\text{C}$  NMR ( $\text{CDCl}_3$ , 150 MHz):  $\delta$  11.80, 12.06, 12.90, 19.59, 19.62, 19.65, 19.68, 19.74, 20.58, 21.02, 22.61, 22.69, 23.90 (br), 24.44, 24.80, 27.97, 31.00, 31.04, 32.69, 32.72, 32.78, 32.80, 37.31, 37.35, 37.37, 37.41, 37.42, 37.46, 37.47, 37.54, 37.57, 39.39, 40.12 (br), 74.48, 75.24, 76.06, 117.60, 123.33, 124.80, 126.51, 139.84, 149.95, 151.44. IR (film): 2925, 2867, 2123, 1730, 1460, 1194, 1108, 1066, 905  $\text{cm}^{-1}$ ; HRMS (ESI) for  $\text{C}_{32}\text{H}_{50}\text{O}_3\text{Na}$   $[\text{M}+\text{Na}]^+$ : calcd 505.3658, found 505.3638.  $R_f = 0.7$  (10% ethyl acetate/90% hexanes).

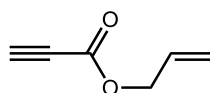

**41-SM**

**Allyl propiolate.** Extra 8% DMAP was used as a catalyst. Column chromatography on silica gel (eluent: hexanes/ethyl acetate = 50:1) afforded the title product in 54% yield as a pale yellow oil.  $^1\text{H}$  NMR ( $\text{CDCl}_3$ , 400 MHz):  $\delta$  2.89 (s, 3H), 4.67-4.69 (m, 2H), 5.27-5.31 (m, 1H), 5.34-5.40 (m, 1H), 5.87-5.97 (m, 1H).  $R_f = 0.5$  (10% ethyl acetate/90% hexanes). The spectroscopic data is in agreement with that previously reported. (51)

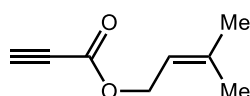

**42-SM**

**3-Methylbut-2-en-1-yl propiolate.** Extra 10% DMAP was used as a catalyst. Column chromatography on silica gel (eluent: hexanes/ethyl acetate = 50:1) afforded the title product in 58% yield as a pale yellow oil.  $^1\text{H}$  NMR ( $\text{CDCl}_3$ , 400 MHz):  $\delta$  1.72 (s, 3H), 1.77 (s, 3H), 2.85 (s, 3H), 4.69 (d,  $J = 7.2$  Hz, 2H), 5.34-5.40 (m, 1H).  $R_f = 0.5$  (10% ethyl acetate/90% hexanes).

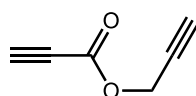

**43-SM**

**Prop-2-yn-1-yl propiolate.** Extra 0.2% DMAP was used as a catalyst. Column chromatography on

silica gel (eluent: hexanes/ethyl acetate = 50:1) afforded the title product in 11% yield as a pale yellow oil.  $^1\text{H NMR}$  ( $\text{CDCl}_3$ , 400 MHz):  $\delta$  2.54 (t,  $J = 6.4$  Hz, 1H), 2.94 (s, 1H), 4.78 (d,  $J = 2.4$  Hz, 2H).  $R_f = 0.5$  (10% ethyl acetate/90% hexanes). The spectroscopic data is in agreement with that previously reported. (52)

**Procedure for the synthesis of alkyne 13-SM:**

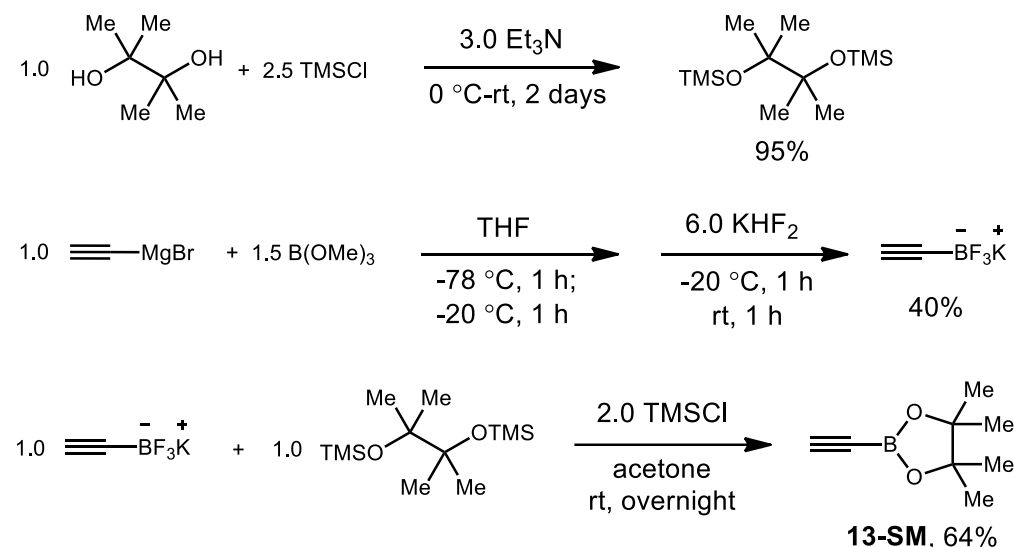

**2,2,4,4,5,5,7,7-Octamethyl-3,6-dioxa-2,7-disilaoctane.** According to the known procedure, TMSCl (6.35 mL, 50.0 mmol) was added dropwise to a stirred solution of pinacol (2.36 g, 20.0 mmol) and  $\text{Et}_3\text{N}$  (8.36 mL, 60.0 mmol) in DCM (40 mL) at 0 °C and the resultant mixture was stirred at room temperature for 48 h. The mixture was then cooled to 0 °C and water was added. The organic layer was separated, dried over  $\text{Na}_2\text{SO}_4$ . Then the solvent was removed under vacuum and the crude product was purified by column chromatography on silica gel (eluent: hexanes) to afford the title product in 95% yield as a colorless oil.  $^1\text{H NMR}$  ( $\text{CDCl}_3$ , 600 MHz):  $\delta$  0.09 (s, 18H), 1.19 (s, 12H). The spectroscopic data is in agreement with that previously reported. (53)

**Potassium ethynyltrifluoroborate.** According to the known procedure, in a 200 mL of 2-neck flask, to the ethynyl Grignard reagent (40 mmol, 0.5 M in THF, 80 mL), was added  $\text{B}(\text{OMe})_3$  (6.68 mL, 60 mmol) at -78 °C. The mixture was stirred at -78 °C for 1 h and then stirred at -20 °C for 1 h. To the reaction mixture was added  $\text{KHF}_2$  (19 g, 240 mmol) in distilled water (20 mL) at -20 °C. The aqueous mixture was stirred at this temperature for 1 h and then at room temperature for 1 h. The obtained reaction

mixture was concentrated and dried under vacuum for 4 h. The crude product was dissolved in hot acetone and the residue was removed by filtration. The filtrate was concentrated to afford the title product (2.1 g, 40%) as an off-white solid.  $^1\text{H}$  NMR (DMSO- $d_6$ , 600 MHz):  $\delta$  1.91 (s, 1H);  $^{19}\text{F}$  NMR (DMSO- $d_6$ , 565 MHz):  $\delta$  -132.34 (q). The spectroscopic data is in agreement with that previously reported. (54)

**2-Ethynyl-4,4,5,5-tetramethyl-1,3,2-dioxaborolane.** According to the known procedure, to a solution of the potassium ethynyltrifluoroborate (2.3 g, 17.4 mmol) and 2,3-dimethyl-2,3-butanediol bis(trimethylsilyl) ether (4.57 mL, 17.4 mmol) in dry acetone (50 mL) was added TMSCl (4.42 mL, 34.8 mmol) at room temperature. The mixture was stirred overnight. The precipitates were removed by filtration. The filtrate was concentrated in vacuo. Then the crude oil was purified by distillation to afford the desired alkyne as a colorless oil (b.p. = 75 °C /20 mmHg, 1.7g, 64% yield).  $^1\text{H}$  NMR ( $\text{CDCl}_3$ , 400 MHz): 1.28 (s, 12H), 2.48 (s, 1H);  $^{13}\text{C}$  NMR ( $\text{CDCl}_3$ , 150 MHz):  $\delta$  24.59, 57.23, 84.53, 90.13. The spectroscopic data is in agreement with that previously reported. (55)

**Procedure for the synthesis of alkyne 18-SM: (56)**

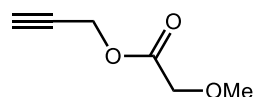

**18-SM**

**Prop-2-yn-1-yl 2-methoxyacetate.** According to the known procedure, neutral  $\text{Al}_2\text{O}_3$  (1.53 g, 15 mmol) was added to propargylic alcohol (0.58 mL, 10 mmol, stirring not required) and then mixed with methoxyacetyl chloride (1.83 mL, 20 mmol) in one portion. The resultant dispersion was stoppered tightly and kept aside unstirred at 25 °C for 4h. Then the dispersion was taken with EtOAc (3 mL) and filtered. The solvent was removed under vacuum and the crude product was purified by column chromatography on silica gel (eluent: hexanes/ethyl acetate = 30:1-20:1) to afford the title product in 70% yield as a colorless oil.  $^1\text{H}$  NMR ( $\text{CDCl}_3$ , 400 MHz):  $\delta$  2.49 (t,  $J$  = 2.8 Hz, 1H), 3.44 (s, 3H), 4.07 (s, 2H), 4.75 (d,  $J$  = 2.4 Hz, 2H);  $^{13}\text{C}$  NMR ( $\text{CDCl}_3$ , 100 MHz):  $\delta$  52.12, 59.38, 69.55, 75.27, 77.07, 169.41.  $R_f$  = 0.3 (10% ethyl acetate/90% hexanes). The spectroscopic data is in agreement with that previously reported. (57)

**Procedure for the synthesis of alkyne 20-SM: (58)**

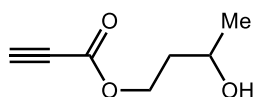

**20-SM**

**3-Hydroxybutyl propiolate.** According to the known procedure, to a suspended solution of sodium cyanoborohydride (628 mg, 10.0 mmol) and zinc chloride (680 mg, 5.0 mmol) in diethyl ether (30 mL) at 0 °C was added 3-oxobutyl propiolate (1.4 g, 10.0 mmol). The reaction mixture was stirred at room temperature for 4 h, diluted with diethyl ether (3 mL), and quenched with water. The aqueous layer was extracted with diethyl ether and the combined ether extracts were dried over Na<sub>2</sub>SO<sub>4</sub>. Then the solvent was removed under vacuum and the crude product was purified by column chromatography on silica gel (eluent: hexanes/ethyl acetate = 7:1-4:1) to afford the title product in 60% yield as a colorless oil. <sup>1</sup>H NMR (CDCl<sub>3</sub>, 400 MHz): δ 1.22 (d, *J* = 6.0 Hz, 3H), 1.70-1.87 (m, 2 H), 1.90 (br, 1H), 2.90 (s, 1H), 3.92 (br, 1H), 4.25-4.30 (m, 1H), 4.36-4.42 (m, 1H); <sup>13</sup>C NMR (CDCl<sub>3</sub>, 150 MHz): δ 23.62, 37.46, 63.54, 64.63, 74.54, 74.88, 152.83. IR (film): 3261, 2969, 2935, 2117, 1702, 1378, 1238, 1137, 1035, 754 cm<sup>-1</sup>; HRMS (ESI) for C<sub>7</sub>H<sub>10</sub>IO<sub>3</sub>Na [M+Na]<sup>+</sup>: calcd 165.0528, found 165.0493. R<sub>f</sub> = 0.38 (20% ethyl acetate/80% hexanes).

**Table S1:** Reaction optimization**(Procedure A)**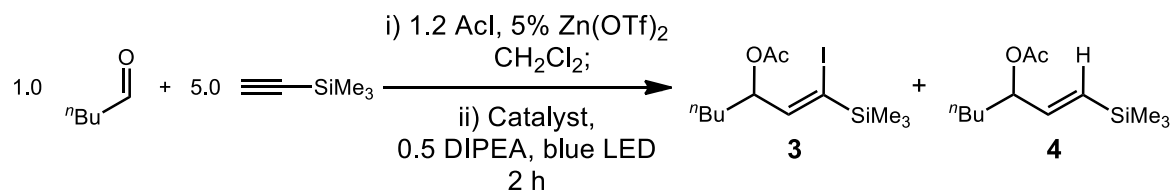

| entry    | catalyst                                        | Yield (3:4)          | Z:E (3)         |
|----------|-------------------------------------------------|----------------------|-----------------|
| 1        | 10% [CpFe(CO) <sub>2</sub> ] <sub>2</sub>       | 20%, >20:1           | 2:1             |
| 2*       | 1% Ru(bpy) <sub>3</sub> Cl <sub>2</sub>         | 31%, >20:1           | 3:1             |
| 3*       | 1% Ir(ppy) <sub>2</sub> (dtbbpy)PF <sub>6</sub> | 60%, >20:1           | >20:1           |
| <b>4</b> | <b>10% Mn<sub>2</sub>(CO)<sub>10</sub></b>      | <b>78%, &gt;20:1</b> | <b>&gt;20:1</b> |

\* 3.0 DIPEA was used, and the reaction was run for 24 h.

**(Procedure B)**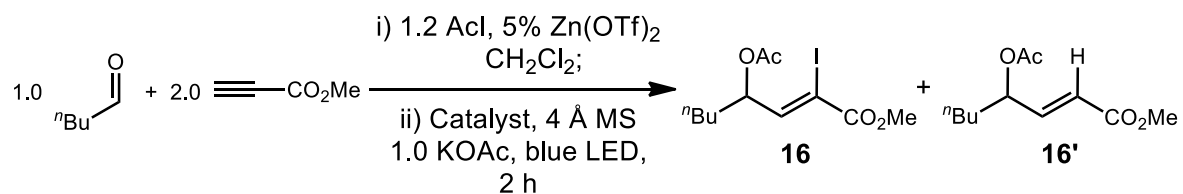

| entry    | catalyst                                   | Yield (16:16')   | Z:E (16)    |
|----------|--------------------------------------------|------------------|-------------|
| 1*       | 1% Ru(bpy) <sub>3</sub> Cl <sub>2</sub>    | 28%, 6:1         | 1:1         |
| 2*       | 1% Ir(ppy) <sub>3</sub>                    | 32%, 4:1         | 3:1         |
| 3        | 20% [CpFe(CO) <sub>2</sub> ] <sub>2</sub>  | 60%, >20:1       | 1:1         |
| <b>4</b> | <b>20% Mn<sub>2</sub>(CO)<sub>10</sub></b> | <b>65%, 14:1</b> | <b>14:1</b> |

\* 1.0 DIPEA was used, and the reaction was run for 24 h without 4 Å MS.

**Fig. S1:** Light set-up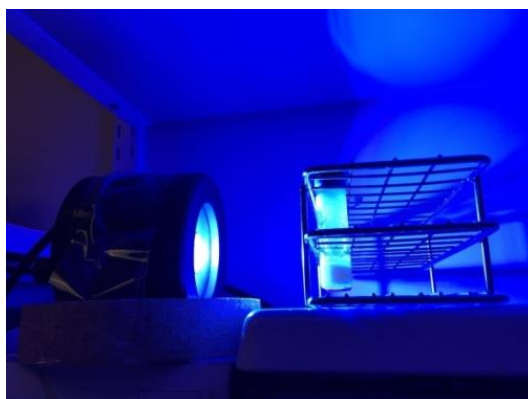

## General procedure for the synthesis of vinyl iodides.

### Procedure A (When triethylsilyl acetylene or trimethylsilyl acetylene was used):

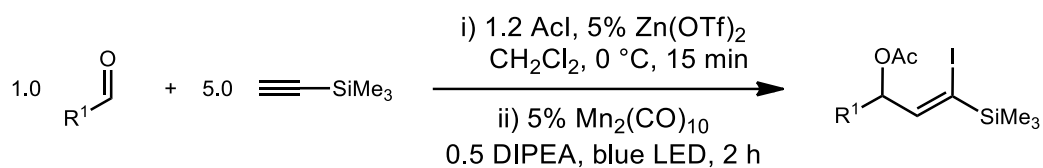

To an 8 mL vial was added DCM (0.5 mL), AcI (0.6 mmol), Zn(OTf)<sub>2</sub> (0.025 mmol) and aldehyde (0.5 mmol) consecutively at 0 °C. The mixture was stirred at the same temperature for 15 min. To this mixture was added DIPEA (0.25 mmol) at 0 °C, then the mixture was stirred for another 15 min. After that triethylsilyl acetylene (2.5 mmol) and Mn<sub>2</sub>(CO)<sub>10</sub> (0.025 mmol) were added to the mixture. The reaction mixture was degassed by chill-pump-thaw for 20 min, then irradiated with one 90 W blue LED lamp (Kessil A360WE tuna blue) or two 45 W blue LED lamps (Kessil A160WE tuna blue) at approximately 5 cm away from the light source. The reaction temperature was around 40 °C. After 2 h, the solvent was removed under vacuum and the crude product was purified by column chromatography on silica gel. *Z:E* ratios were determined using purified products via <sup>1</sup>H NMR.

**\*Note:** 1) The quality of AcI is crucial for the reaction since HI generated from impure AcI would destroy Mn<sub>2</sub>(CO)<sub>10</sub> to yield poor yield and selectivity. 2) Zn(OTf)<sub>2</sub> was used to eliminate side product (<10%) formation in α-acetoxy iodide generation. 3) The concentration of the reaction is crucial for the selectivity as lower concentration affords poor selectivity. 4) Peak absorbance of the light: 458 nm.

### Procedure B (When other alkynes were used):

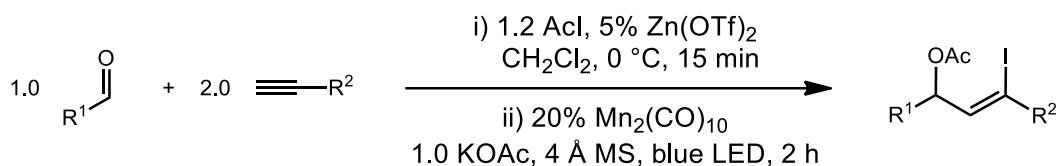

To an 8 mL vial was added DCM (1.0 mL), AcI (0.6 mmol), Zn(OTf)<sub>2</sub> (0.025 mmol) and aldehyde (0.5 mmol) consecutively at 0 °C. The mixture was stirred at the same temperature for 15 min. To this mixture was added 4Å MS (25 mg) and KOAc (0.5 mmol) at 0 °C, then the mixture was stirred for another 15 min. After that alkyne (1.0 mmol) and Mn<sub>2</sub>(CO)<sub>10</sub> (0.1 mmol) were added to the mixture. The reaction mixture was degassed by chill-pump-thaw for 20 min, then irradiated with one 90 W blue LED lamp (Kessil A360WE tuna blue) or two 45 W blue LED lamps (Kessil A160WE tuna blue) at

approximately 5 cm away from the light source. The reaction temperature was around 40 °C. After 2 h, the solvent was removed under vacuum and the crude product was purified by column chromatography on silica gel. *Z:E* ratios were determined using purified products via <sup>1</sup>H NMR.

**\*Note:** 1) The quality of AcI is crucial for the reaction since HI generated from impure AcI would destroy Mn<sub>2</sub>(CO)<sub>10</sub> to yield poor yield and selectivity. 2) Zn(OTf)<sub>2</sub> was used to eliminate side product (<10%) formation in α-acetoxy iodide generation. 3) The concentration of the reaction is crucial for the selectivity as lower concentration affords poor selectivity. 4) Peak absorbance of the light: 458 nm.

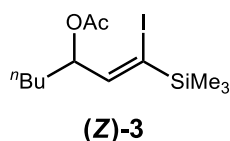

**(Z)-1-Iodo-1-(trimethylsilyl)hept-1-en-3-yl acetate.** 10% Mn<sub>2</sub>(CO)<sub>10</sub> catalyst was used. Column chromatography on silica gel (eluent: hexanes/ethyl acetate = 100:1) afforded the title product in 78% yield as a colorless oil. *Z:E* ratio: >20:1. <sup>1</sup>H NMR (CDCl<sub>3</sub>, 600 MHz): δ 0.18 (s, 9H), 0.90 (t, *J* = 7.2 Hz, 3H), 1.31-1.37 (m, 4H), 1.60-1.69 (m, 2H), 2.06 (s, 3H), 5.46-5.50 (m, 1H), 6.16 (d, *J* = 7.2 Hz, 1H); <sup>13</sup>C NMR (CDCl<sub>3</sub>, 150 MHz): δ -1.58, 13.92, 21.13, 22.50, 26.95, 32.88, 79.72, 113.52, 145.52, 170.05. IR (film): 2956, 2861, 1738, 1369, 1227, 1018, 839 cm<sup>-1</sup>; HRMS (ESI) for C<sub>12</sub>H<sub>23</sub>IO<sub>2</sub>SiNa [M+Na]<sup>+</sup>: calcd 377.0410, found 377.0393. R<sub>f</sub> = 0.35 (5% ethyl acetate/95% hexanes).

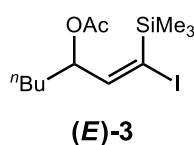

**(E)-1-Iodo-1-(trimethylsilyl)hept-1-en-3-yl acetate.** <sup>1</sup>H NMR (CDCl<sub>3</sub>, 600 MHz): δ 0.32 (s, 9H), 0.90 (t, *J* = 7.2 Hz, 3H), 1.23-1.36 (m, 4H), 1.46-1.52 (m, 1H), 1.62-1.68 (m, 1H), 2.04 (s, 3H), 5.32-5.35 (m, 1H), 7.01 (d, *J* = 9.6 Hz, 1H); <sup>13</sup>C NMR (CDCl<sub>3</sub>, 150 MHz): δ 0.89, 13.89, 21.13, 22.48, 27.08, 34.09, 74.40, 113.46, 153.09, 170.10. IR (film): 2957, 2932, 2861, 1739, 1370, 1231, 1018, 843 cm<sup>-1</sup>; HRMS (ESI) for C<sub>12</sub>H<sub>23</sub>IO<sub>2</sub>SiNa [M+Na]<sup>+</sup>: calcd 377.0410, found 377.0394. R<sub>f</sub> = 0.38 (5% ethyl acetate/95% hexanes).



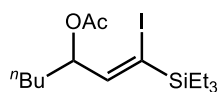

**(Z)-12**

**(Z)-1-Iodo-1-(triethylsilyl)hept-1-en-3-yl acetate.** Column chromatography on silica gel (eluent: hexanes/ethyl acetate = 100:1) afforded the title product in 78% yield as a colorless oil. *Z:E* ratio: >20:1. <sup>1</sup>H NMR (CDCl<sub>3</sub>, 600 MHz): δ 0.69 (q, *J* = 8.4 Hz, 6H), 0.89 (t, *J* = 7.2 Hz, 3H), 0.94 (t, *J* = 7.8 Hz, 9H), 1.30-1.37 (m, 4H), 1.59-1.71 (m, 2H), 2.04 (s, 3H), 5.46-5.50 (m, 1H), 6.16 (d, *J* = 6.6 Hz, 1H); <sup>13</sup>C NMR (CDCl<sub>3</sub>, 150 MHz): δ 2.89, 6.99, 13.91, 21.08, 22.51, 26.91, 32.85, 79.90, 110.00, 147.24, 169.95. IR (film): 2954, 2873, 1740, 1368, 1227, 1004, 965, 824 cm<sup>-1</sup>; HRMS (ESI) for C<sub>15</sub>H<sub>29</sub>IO<sub>2</sub>SiNa [M+Na]<sup>+</sup>: calcd 419.0879, found 419.0857. R<sub>f</sub> = 0.35 (5% ethyl acetate/95% hexanes).

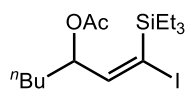

**(E)-12**

**(E)-1-Iodo-1-(triethylsilyl)hept-1-en-3-yl acetate.** <sup>1</sup>H NMR (CDCl<sub>3</sub>, 400 MHz): δ 0.76-0.93 (m, 9H), 0.98 (t, *J* = 8.0 Hz, 9H), 1.23-1.36 (m, 4H), 1.44-1.53 (m, 1H), 1.61-1.70 (m, 1H), 2.03 (s, 3H), 5.22-5.28 (m, 1H), 7.16 (d, *J* = 10.0 Hz, 1H); <sup>13</sup>C NMR (CDCl<sub>3</sub>, 100 MHz): δ 4.63, 7.29, 13.90, 21.11, 22.53, 27.13, 34.50, 74.70, 111.46, 155.16, 170.03. IR (film): 2955, 2933, 2874, 1740, 1369, 1230, 1017, 1002 cm<sup>-1</sup>; HRMS (ESI) for C<sub>15</sub>H<sub>29</sub>IO<sub>2</sub>SiNa [M+Na]<sup>+</sup>: calcd 419.0879, found 419.0865. R<sub>f</sub> = 0.38 (5% ethyl acetate/95% hexanes).

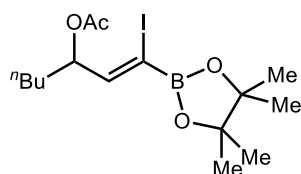

**(Z)-13**

**(Z)-1-Iodo-1-(4,4,5,5-tetramethyl-1,3,2-dioxaborolan-2-yl)hept-1-en-3-yl acetate.** Column chromatography on silica gel (eluent: hexanes/ethyl acetate = 30:1-20:1-8:1) afforded the title product and the isomer in 52% yield as a colorless oil. *Z:E* ratio: 6:1. <sup>1</sup>H NMR (CDCl<sub>3</sub>, 600 MHz): δ 0.90 (t, *J* = 6.6 Hz, 3H), 1.24-1.35 (m, 16H), 1.64-1.68 (m, 2H), 2.05 (s, 3H), 5.44-5.48 (m, 1H), 6.79 (d, *J* = 7.2 Hz, 1H); <sup>13</sup>C NMR (CDCl<sub>3</sub>, 100 MHz): δ 13.91, 21.04, 22.48, 24.72, 24.75, 26.97, 32.41, 78.92, 85.00,

152.39, 170.20. IR (film): 2955, 2928, 1738, 1371, 1326, 1230, 1141, 1019, 849  $\text{cm}^{-1}$ ; HRMS (ESI) for  $\text{C}_{15}\text{H}_{26}\text{IO}_4\text{BNa}$   $[\text{M}+\text{Na}]^+$ : calcd 431.0867, found 431.0675.  $R_f = 0.1$  (9% ethyl acetate/91% hexanes).

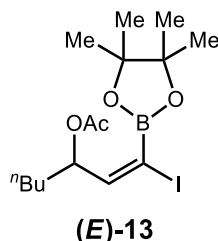

**(E)-1-Iodo-1-(4,4,5,5-tetramethyl-1,3,2-dioxaborolan-2-yl)hept-1-en-3-yl acetate.**  $^1\text{H}$  NMR ( $\text{CDCl}_3$ , 600 MHz):  $\delta$  0.89 (t,  $J = 7.2$  Hz, 3H), 1.22-1.35 (m, 16H), 1.51-1.68 (m, 2H), 2.02 (s, 3H), 5.61-5.65 (m, 1H), 6.96 (d,  $J = 9.0$  Hz, 1H);  $^{13}\text{C}$  NMR ( $\text{CDCl}_3$ , 150 MHz):  $\delta$  13.88, 21.13, 22.26, 24.58, 24.73, 26.91, 33.74, 74.82, 85.00, 155.37, 169.96. IR (film): 2931, 2858, 1738, 1371, 1323, 1230, 1141, 1017, 967, 847  $\text{cm}^{-1}$ ; HRMS (ESI) for  $\text{C}_{15}\text{H}_{26}\text{IO}_4\text{BNa}$   $[\text{M}+\text{Na}]^+$ : calcd 431.0867, found 431.0692.  $R_f = 0.30$  (9% ethyl acetate/91% hexanes).

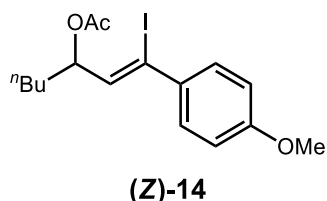

**(Z)-1-Iodo-1-(4-methoxyphenyl)hept-1-en-3-yl acetate.** Column chromatography on silica gel (eluent: hexanes/ethyl acetate = 30:1) afforded the title product and the isomer in 56% yield as a colorless oil.  $Z:E$  ratio: 7:1.  $^1\text{H}$  NMR ( $\text{CDCl}_3$ , 600 MHz):  $\delta$   $Z$  isomer (major): 0.92 (t,  $J = 7.2$  Hz, 3H), 1.35-1.41 (m, 4H), 1.67-1.79 (m, 2H), 2.07 (s, 3H), 3.82 (s, 3H), 5.51-5.54 (m, 1H), 5.87 (d,  $J = 7.8$  Hz, 1H), 6.81-6.84 (m, 2H), 7.40-7.42 (m, 2H);  $E$  isomer (minor): 0.84 (t,  $J = 7.2$  Hz, 3H), 1.19-1.23 (m, 4H), 1.47-1.63 (m, 2H), 2.01 (s, 3H), 3.81 (s, 3H), 5.10-5.14 (m, 1H), 6.35 (d,  $J = 9.0$  Hz, 1H), 6.84-6.85 (m, 2H), 7.26-7.27 (m, 2H);  $^{13}\text{C}$  NMR ( $\text{CDCl}_3$ , 100 MHz):  $\delta$   $Z$  isomer (major): 13.93, 21.11, 22.56, 27.03, 33.58, 55.37, 79.37, 106.01, 113.50, 129.79, 135.05, 135.33, 160.04, 170.09;  $E$  isomer (minor): 13.80, 21.05, 22.31, 26.90, 33.96, 55.26, 72.78, 100.45, 113.61, 129.58, 133.94, 140.77, 159.54, 169.85. IR (film): 2952, 2858, 1734, 1603, 1506, 1369, 1230, 1176, 1030, 961, 826  $\text{cm}^{-1}$ ; HRMS (ESI) for  $\text{C}_{16}\text{H}_{21}\text{IO}_3\text{Na}$   $[\text{M}+\text{Na}]^+$ : calcd 411.0433, found 411.0414.  $R_f = 0.25$  (9% ethyl acetate/91% hexanes).

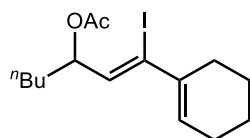

**(Z)-15**

**(Z)-1-(Cyclohex-1-en-1-yl)-1-iodohept-1-en-3-yl acetate.** Column chromatography on silica gel (eluent: hexanes/ethyl acetate = 100:1) afforded the title product and the isomer in 50% yield as a colorless oil. *Z:E* ratio: 2.2:1. <sup>1</sup>H NMR (CDCl<sub>3</sub>, 600 MHz): δ 0.90 (t, *J* = 7.2 Hz, 3H), 1.31-1.36 (m, 4H), 1.55-1.59 (m, 3H), 1.63-1.69 (m, 3H), 2.05 (s, 3H), 2.15-2.16 (m, 2H), 2.24-2.33 (m, 2H), 5.55-5.58 (m, 1H), 5.75 (d, *J* = 7.2 Hz, 1H), 6.18 (d, *J* = 4.2 Hz, 1H); <sup>13</sup>C NMR (CDCl<sub>3</sub>, 100 MHz): δ 13.95, 21.17, 22.15, 22.56, 22.84, 26.13, 27.02, 27.76, 33.66, 79.54, 112.75, 132.04, 134.07, 136.78, 170.15. IR (film): 2928, 2861, 1736, 1369, 1228, 1017, 957, 957, 799 cm<sup>-1</sup>; HRMS (ESI) for C<sub>15</sub>H<sub>23</sub>IO<sub>2</sub>Na [M+Na]<sup>+</sup>: calcd 385.0640, found 385.0645. R<sub>f</sub> = 0.35 (5% ethyl acetate/95% hexanes).

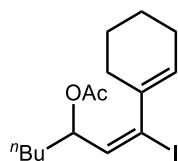

**(E)-15**

**(E)-1-(Cyclohex-1-en-1-yl)-1-iodohept-1-en-3-yl acetate.** <sup>1</sup>H NMR (CDCl<sub>3</sub>, 600 MHz): δ 0.89 (t, *J* = 7.2 Hz, 3H), 1.23-1.34 (m, 4H), 1.46-1.52 (m, 1H), 1.56-1.64 (m, 3H), 1.65-1.73 (m, 2H), 2.00-2.04 (m, 2H), 2.01 (s, 3H), 2.14-2.18 (m, 2H), 5.36-5.40 (m, 1H), 5.73-5.75 (m, 1H), 6.03 (d, *J* = 9.6 Hz, 1H); <sup>13</sup>C NMR (CDCl<sub>3</sub>, 100 MHz): δ 13.85, 21.16, 21.74, 22.21, 22.36, 25.22, 27.11, 27.86, 34.13, 72.33, 107.77, 127.18, 138.59, 138.79, 169.90. IR (film): 2929, 2834, 1738, 1435, 1368, 1228, 1015, 957, 922, 725 cm<sup>-1</sup>; HRMS (ESI) for C<sub>15</sub>H<sub>23</sub>IO<sub>2</sub>Na [M+Na]<sup>+</sup>: calcd 385.0640, found 385.0618. R<sub>f</sub> = 0.40 (5% ethyl acetate/95% hexanes).

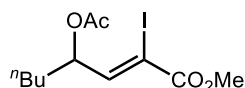

**(Z)-16**

**(Z)-Methyl 4-acetoxy-2-iodooct-2-enoate.** Column chromatography on silica gel (eluent: hexanes/ethyl acetate = 30:1) afforded the title product and the isomer in 65% yield as a colorless oil. *Z:E* ratio: 14:1. <sup>1</sup>H NMR (CDCl<sub>3</sub>, 600 MHz): δ 0.90 (t, *J* = 7.2 Hz, 3H), 1.31-1.39 (m, 4H), 1.63-1.75 (m, 2H), 2.06 (s,

3H), 3.82 (s, 3H), 5.38-5.42 (m, 1H), 7.16 (d,  $J = 7.2$  Hz, 1H);  $^{13}\text{C}$  NMR ( $\text{CDCl}_3$ , 100 MHz):  $\delta$  13.84, 20.88, 22.41, 26.87, 32.27, 53.71, 77.64, 93.78, 150.48, 162.93, 170.19. IR (film): 2954, 2861, 1726, 1618, 1433, 1225, 1020, 893, 745  $\text{cm}^{-1}$ ; HRMS (ESI) for  $\text{C}_{11}\text{H}_{17}\text{IO}_4\text{Na}$   $[\text{M}+\text{Na}]^+$ : calcd 363.0069, found 363.0047.  $R_f = 0.25$  (9% ethyl acetate/91% hexanes).

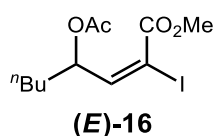

**(E)-Methyl 4-acetoxy-2-iodooct-2-enoate.**  $^1\text{H}$  NMR ( $\text{CDCl}_3$ , 400 MHz):  $\delta$  0.88 (t,  $J = 7.6$  Hz, 3H), 1.27-1.36 (m, 4H), 1.58-1.70 (m, 2 H), 2.02 (s, 3H), 3.80 (s, 3H), 5.78-5.84 (m, 1H), 6.72 (d,  $J = 8.4$  Hz, 1H);  $^{13}\text{C}$  NMR ( $\text{CDCl}_3$ , 100 MHz):  $\delta$  13.83, 20.91, 22.30, 26.96, 33.16, 53.28, 73.19, 86.41, 153.30, 163.54, 170.11. IR (film): 2954, 2860, 1716, 1608, 1433, 1221, 1143, 882, 783  $\text{cm}^{-1}$ ; HRMS (ESI) for  $\text{C}_{11}\text{H}_{17}\text{IO}_4\text{Na}$   $[\text{M}+\text{Na}]^+$ : calcd 363.0069, found 363.0032.  $R_f = 0.3$  (9% ethyl acetate/91% hexanes).

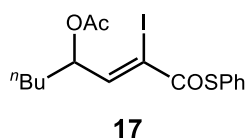

**(Z)-2-Iodo-1-oxo-1-(phenylthio)oct-2-en-4-yl acetate.** Column chromatography on silica gel (eluent: hexanes/ethyl acetate = 50:1 to 30:1) afforded the title product in 57% yield as a colorless oil. *Z:E* ratio: >20:1.  $^1\text{H}$  NMR ( $\text{CDCl}_3$ , 600 MHz):  $\delta$  0.93 (t,  $J = 7.2$  Hz, 3H), 1.34-1.43 (m, 4H), 1.69-1.81 (m, 2H), 2.10 (s, 3H), 5.49-5.52 (m, 1H), 7.20 (d,  $J = 7.2$  Hz, 1H), 7.41-7.46 (m, 5H);  $^{13}\text{C}$  NMR ( $\text{CDCl}_3$ , 100 MHz):  $\delta$  13.83, 20.87, 22.42, 26.92, 32.43, 77.58, 102.48, 127.81, 129.30, 129.82, 134.73, 147.87, 170.11, 186.22. IR (film): 2957, 2858, 1739, 1682, 1440, 1369, 1226, 1060, 1022, 745  $\text{cm}^{-1}$ ; HRMS (ESI) for  $\text{C}_{16}\text{H}_{19}\text{IO}_3\text{SNa}$   $[\text{M}+\text{Na}]^+$ : calcd 440.9997, found 440.9972.  $R_f = 0.30$  (9% ethyl acetate/91% hexanes).

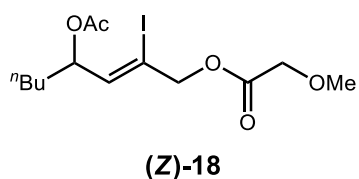

**(Z)-4-Acetoxy-2-iodooct-2-en-1-yl 2-methoxyacetate.** Column chromatography on silica gel (eluent:

hexanes/ethyl acetate = 10:1-7:1) afforded the title product and the isomer in 54% yield as a colorless oil. *Z:E* ratio: 3:1. <sup>1</sup>H NMR (CDCl<sub>3</sub>, 600 MHz): δ 0.89 (t, *J* = 7.2 Hz, 3H), 1.27-1.36 (m, 4H), 1.57-1.69 (m, 2H), 2.04 (s, 3H), 3.46 (s, 3H), 4.09 (s, 2H), 4.81 (dd, *J* = 13.2, 1.2 Hz, 1H), 4.85 (d, *J* = 13.2, 1.2 Hz, 1H), 5.34-5.38 (m, 1H), 5.98 (dt, *J* = 7.8, 1.2 Hz, 1H); <sup>13</sup>C NMR (CDCl<sub>3</sub>, 150 MHz): δ 13.83, 20.97, 22.42, 26.84, 31.14, 59.44, 69.67, 71.30, 77.47, 99.96, 137.59, 169.25, 169.99. IR (film): 2957, 2856, 1735, 1370, 1229, 1176, 1124, 1019, 961, 933 cm<sup>-1</sup>; HRMS (ESI) for C<sub>13</sub>H<sub>21</sub>IO<sub>5</sub>Na [M+Na]<sup>+</sup>: calcd 407.0331, found 407.0310. R<sub>f</sub> = 0.20 (9% ethyl acetate/91% hexanes).

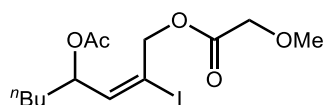

**(E)-18**

**(E)-4-Acetoxy-2-iodooct-2-en-1-yl 2-methoxyacetate.** <sup>1</sup>H NMR (CDCl<sub>3</sub>, 600 MHz): δ 0.90 (t, *J* = 7.2 Hz, 3H), 1.22-1.36 (m, 4H), 1.52-1.69 (m, 2H), 2.04 (s, 3H), 3.47 (s, 3H), 4.11 (s, 2H), 4.78 (d, *J* = 13.2 Hz, 1H), 5.16 (d, *J* = 12.6 Hz, 1H), 5.44-5.48 (m, 1H), 6.31 (d, *J* = 9.6 Hz, 1H); <sup>13</sup>C NMR (CDCl<sub>3</sub>, 150 MHz): δ 13.85, 20.99, 22.36, 26.95, 33.68, 59.48, 66.37, 69.76, 71.45, 98.70, 143.95, 169.46, 170.15. IR (film): 2931, 2862, 1737, 1370, 1230, 1178, 1126, 1018, 968, 932 cm<sup>-1</sup>; HRMS (ESI) for C<sub>13</sub>H<sub>21</sub>IO<sub>5</sub>Na [M+Na]<sup>+</sup>: calcd 407.0331, found 407.0314. R<sub>f</sub> = 0.25 (9% ethyl acetate/91% hexanes).

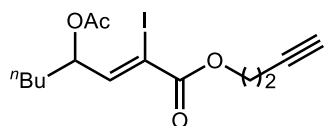

**(Z)-19**

**(Z)-But-3-yn-1-yl 4-acetoxy-2-iodooct-2-enoate.** Column chromatography on silica gel (eluent: hexanes/ethyl acetate = 30:1) afforded the title product and the isomer in 50% yield as a colorless oil. *Z:E* ratio: 8:1. <sup>1</sup>H NMR (CDCl<sub>3</sub>, 600 MHz): δ 0.91 (t, *J* = 7.2 Hz, 3H), 1.31-1.40 (m, 4H), 1.63-1.76 (m, 2H), 2.02 (t, *J* = 3.0 Hz, 1H), 2.07 (s, 3H), 2.60 (dt, *J* = 7.2, 3.0 Hz, 2H), 4.28-4.34 (m, 2H), 5.39-5.43 (m, 1H), 7.19 (d, *J* = 7.8 Hz, 1H); <sup>13</sup>C NMR (CDCl<sub>3</sub>, 150 MHz): δ 13.83, 18.88, 20.88, 22.42, 26.92, 32.31, 64.39, 70.22, 77.66, 79.45, 93.80, 150.76, 162.15, 170.16. IR (film): 3291, 2957, 2858, 1722, 1371, 1223, 1020, 745 cm<sup>-1</sup>; HRMS (ESI) for C<sub>14</sub>H<sub>19</sub>IO<sub>4</sub>Na [M+Na]<sup>+</sup>: calcd 401.0226, found 401.0203. R<sub>f</sub> = 0.25 (9% ethyl acetate/91% hexanes).

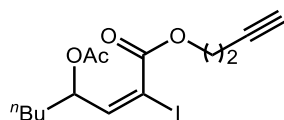

**(E)-19**

**(E)-But-3-yn-1-yl 4-acetoxy-2-iodooct-2-enoate.**  $^1\text{H}$  NMR ( $\text{CDCl}_3$ , 600 MHz):  $\delta$  0.90 (t,  $J = 7.2$  Hz, 3H), 1.29-1.36 (m, 4H), 1.61-1.70 (m, 2H), 2.02 (t,  $J = 2.4$  Hz, 1H), 2.04 (s, 3H), 2.56-2.65 (m, 2H), 4.28-4.35 (m, 2H), 5.82-5.86 (m, 1H), 6.75 (d,  $J = 8.4$  Hz, 1H);  $^{13}\text{C}$  NMR ( $\text{CDCl}_3$ , 100 MHz):  $\delta$  13.85, 18.79, 20.93, 22.41, 26.99, 33.28, 64.18, 70.31, 73.22, 79.46, 86.70, 153.18, 162.87, 170.04. IR (film): 2955, 2861, 1724, 1370, 1225, 1018, 647  $\text{cm}^{-1}$ ; HRMS (ESI) for  $\text{C}_{14}\text{H}_{19}\text{IO}_4\text{Na}$   $[\text{M}+\text{Na}]^+$ : calcd 401.0226, found 401.0200.  $R_f = 0.30$  (9% ethyl acetate/91% hexanes).

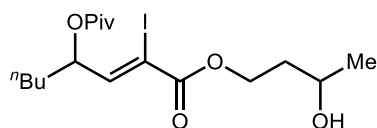

**20**

**(Z)-3-Hydroxybutyl 4-acetoxy-2-iodooct-2-enoate.** Column chromatography on silica gel (eluent: hexanes/ethyl acetate = 7:1 to 4:1) afforded the title product in 55% yield as a colorless oil. *Z:E* ratio: >20:1.  $^1\text{H}$  NMR ( $\text{CDCl}_3$ , 400 MHz):  $\delta$  0.91 (t,  $J = 7.2$  Hz, 3H), 1.21 (s, 9H), 1.25 (d,  $J = 6.0$  Hz, 3H), 1.32-1.41 (m, 4H), 1.62-1.91 (m, 5H), 3.91-3.98 (m, 1H), 4.26-4.32 (m, 1H), 4.40-4.46 (m, 1H), 5.33-5.38 (m, 1H), 7.14 (dd,  $J = 7.6, 0.8$  Hz, 1H);  $^{13}\text{C}$  NMR ( $\text{CDCl}_3$ , 100 MHz):  $\delta$  13.83, 22.32, 23.61, 26.92, 27.08, 32.12, 37.76, 38.80, 64.29, 64.96, 64.97, 77.50, 93.50, 93.51, 150.79, 162.60, 162.62, 177.80. IR (film): 3350, 2959, 2871, 1713, 1479, 1245, 1146, 1092, 1034, 968  $\text{cm}^{-1}$ ; HRMS (ESI) for  $\text{C}_{17}\text{H}_{29}\text{IO}_5\text{Na}$   $[\text{M}+\text{Na}]^+$ : calcd 463.0957, found 463.0932.  $R_f = 0.40$  (20% ethyl acetate/80% hexanes).

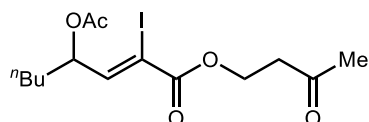

**(Z)-21**

**(Z)-3-Oxobutyl 4-acetoxy-2-iodooct-2-enoate.** Column chromatography on silica gel (eluent: hexanes/ethyl acetate = 10:1 to 8:1) afforded the title product and the isomer in 64% yield as a colorless oil. *Z:E* ratio: 12:1.  $^1\text{H}$  NMR ( $\text{CDCl}_3$ , 400 MHz):  $\delta$  0.90 (t,  $J = 7.2$  Hz, 3H), 1.29-1.39 (m, 4H), 1.60-1.74 (m, 2H), 2.06 (s, 3H), 2.20 (s, 3H), 2.82 (t,  $J = 6.4$  Hz, 2H), 4.45 (t,  $J = 6.4$  Hz, 2H), 5.36-5.41

(m, 1H), 7.12 (d,  $J = 8.0$  Hz, 1H);  $^{13}\text{C}$  NMR ( $\text{CDCl}_3$ , 100 MHz):  $\delta$  13.81, 20.86, 22.39, 26.90, 30.29, 32.28, 41.99, 61.74, 77.61, 93.70, 150.63, 162.25, 170.14, 205.03. IR (film): 2957, 2856, 1716, 1370, 1223, 1167, 1022, 746  $\text{cm}^{-1}$ ; HRMS (ESI) for  $\text{C}_{14}\text{H}_{21}\text{IO}_5\text{Na}$   $[\text{M}+\text{Na}]^+$ : calcd 419.0331, found 419.0322.  $R_f = 0.40$  (20% ethyl acetate/80% hexanes).

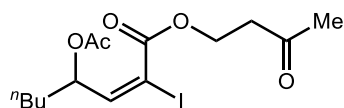

**(E)-21**

**(E)-3-Oxobutyl 4-acetoxy-2-iodooct-2-enoate.**  $^1\text{H}$  NMR ( $\text{CDCl}_3$ , 400 MHz):  $\delta$  0.90 (t,  $J = 7.2$  Hz, 3H), 1.26-1.36 (m, 4H), 1.57-1.69 (m, 2H), 2.03 (s, 3H), 2.21 (s, 3H), 2.84 (t,  $J = 6.6$  Hz, 2H), 4.43-4.49 (m, 2H), 5.77-5.80 (m, 1H), 6.71 (d,  $J = 8.4$  Hz, 1H);  $^{13}\text{C}$  NMR ( $\text{CDCl}_3$ , 100 MHz):  $\delta$  13.85, 20.93, 22.40, 26.96, 30.27, 33.22, 41.82, 61.39, 73.08, 86.85, 152.92, 162.97, 170.07, 205.03. IR (film): 2960, 2861, 1716, 1369, 1223, 1166, 1018, 971  $\text{cm}^{-1}$ ; HRMS (ESI) for  $\text{C}_{14}\text{H}_{21}\text{IO}_5\text{Na}$   $[\text{M}+\text{Na}]^+$ : calcd 419.0331, found 419.0312.  $R_f = 0.45$  (20% ethyl acetate/80% hexanes).

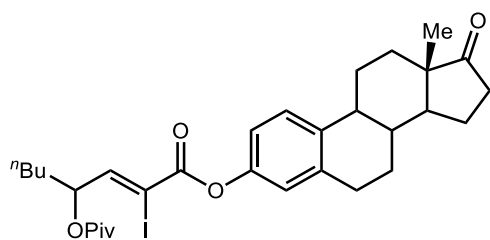

**(Z)-22**

**(Z)-(13S)-13-Methyl-17-oxo-7,8,9,11,12,13,14,15,16,17-decahydro-6H-cyclopenta[a]phenanthren-3-yl 2-iodo-4-(pivaloyloxy)oct-2-enoate.** Column chromatography on silica gel (eluent: hexanes/ethyl acetate = 30:1-15:1-10:1) afforded the title product and the isomer in 50% yield as a light yellow foam.  $Z:E$  ratio: 5:1.  $^1\text{H}$  NMR ( $\text{CDCl}_3$ , 400 MHz):  $\delta$  0.91 (s, 3H), 0.94 (t,  $J = 6.8$  Hz, 3H), 1.23 (s, 9H), 1.35-1.80 (m, 12H), 1.95-2.19 (m, 4H), 2.26-2.32 (m, 1H), 2.39-2.44 (m, 1H), 2.51 (dd,  $J = 18.4, 8.8$  Hz, 1H), 2.91 (dd,  $J = 8.4, 4.4$  Hz, 1H), 5.39-5.44 (m, 1H), 6.87 (d,  $J = 2.8$  Hz, 1H), 6.90 (dd,  $J = 8.8, 2.8$  Hz, 1H), 7.30 (d,  $J = 8.8$  Hz, 1H), 7.32 (d,  $J = 7.6$  Hz, 1H);  $^{13}\text{C}$  NMR ( $\text{CDCl}_3$ , 100 MHz):  $\delta$  13.78, 13.87, 21.54, 22.32, 25.72, 26.26, 26.96, 27.08, 29.33, 31.50, 32.04, 35.79, 37.94, 38.80, 44.10, 47.88, 50.39, 77.67, 93.11, 118.36, 121.20, 126.40, 137.75, 138.09, 148.88, 152.15, 161.20, 177.89, 220.65. IR (film): 2957, 2871, 1729, 1492, 1219, 1181, 1146, 1086, 910, 730  $\text{cm}^{-1}$ ; HRMS (ESI) for  $\text{C}_{31}\text{H}_{41}\text{IO}_5\text{Na}$

[M+Na]<sup>+</sup>: calcd 643.1896, found 643.1899. R<sub>f</sub> = 0.45 (20% ethyl acetate/80% hexanes).

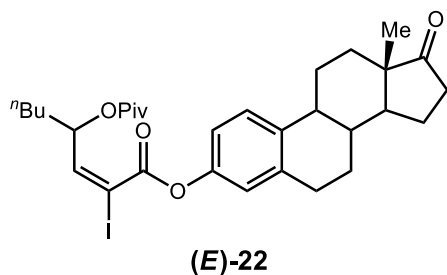

**(E)-(13S)-13-Methyl-17-oxo-7,8,9,11,12,13,14,15,16,17-decahydro-6H-cyclopenta[a]phenanthren-3-yl 2-iodo-4-(pivaloyloxy)oct-2-enoate.** <sup>1</sup>H NMR (CDCl<sub>3</sub>, 600 MHz): δ 0.87 (t, *J* = 7.2 Hz, 3H), 0.91 (s, 3H), 1.21 (s, 9H), 1.28-1.75 (m, 12H), 1.95-2.08 (m, 3H), 2.15 (tt, *J* = 18.0, 9.0 Hz, 1H), 2.29 (dt, *J* = 10.2, 3.6 Hz, 1H), 2.40-2.43 (m, 1H), 2.51 (dd, *J* = 18.6, 8.4 Hz, 1H), 2.92 (dd, *J* = 9.0, 4.2 Hz, 1H), 5.85-5.89 (m, 1H), 6.86 (dd, *J* = 8.4, 2.4 Hz, 1H), 6.90 (d, *J* = 2.4 Hz, 1H), 6.94 (dt, *J* = 8.4, 2.4 Hz, 1H), 7.31 (d, *J* = 8.4 Hz, 1H); <sup>13</sup>C NMR (CDCl<sub>3</sub>, 100 MHz): δ 13.86, 13.95, 21.62, 22.41, 25.79, 26.34, 27.14, 29.42, 31.58, 33.17, 35.89, 38.02, 38.81, 44.20, 47.98, 50.48, 73.35, 85.30, 85.34, 118.50, 121.29, 121.30, 126.53, 137.96, 138.22, 148.51, 155.61, 155.69, 161.93, 161.95, 177.73, 220.78. IR (film): 2957, 2871, 1732, 1492, 1222, 1179, 1150, 1083, 912, 731 cm<sup>-1</sup>; HRMS (ESI) for C<sub>31</sub>H<sub>41</sub>IO<sub>5</sub>Na [M+Na]<sup>+</sup>: calcd 643.1896, found 643.1882. R<sub>f</sub> = 0.50 (20% ethyl acetate/80% hexanes).

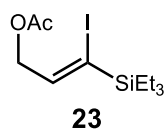

**(Z)-3-Iodo-3-(triethylsilyl)allyl acetate.** [General Procedure A](#). 10% Mn<sub>2</sub>(CO)<sub>10</sub> was used. Column chromatography on silica gel (eluent: hexanes/ethyl acetate = 95:5) afforded the title product in 46% yield as a light yellow oil. *Z:E* ratio: >20:1. <sup>1</sup>H NMR (CDCl<sub>3</sub>, 400 MHz): δ 0.71 (q, *J* = 7.9 Hz, 6H), 0.96 (t, *J* = 7.9 Hz, 9H), 2.10 (s, 3H), 4.67 (d, *J* = 4.9 Hz, 1 H), 6.42 (t, *J* = 4.9 Hz, 1 H); <sup>13</sup>C NMR (CDCl<sub>3</sub>, 150 MHz): δ 3.03, 7.18, 20.98, 71.12, 110.96, 143.48, 170.75. IR (film): 2953, 2874, 1742, 1373, 1220, 1034, 1003, 720, 692 cm<sup>-1</sup>; HRMS (ESI) for C<sub>11</sub>H<sub>21</sub>IO<sub>2</sub>Na [M+Na]<sup>+</sup>: calcd 363.0253, found 363.0225. R<sub>f</sub> = 0.35 (5% ethyl acetate/95% hexanes).



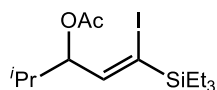

**24**

**(Z)-1-Iodo-4-methyl-1-(triethylsilyl)pent-1-en-3-yl acetate.** Column chromatography on silica gel (eluent: hexanes/ethyl acetate = 98:2) afforded the title product in 70% yield as a light yellow oil. *Z:E* ratio: >20:1.  $^1\text{H}$  NMR ( $\text{CDCl}_3$ , 400 MHz):  $\delta$  0.71 (q,  $J = 7.83$  Hz, 6H), 0.95 (t,  $J = 7.83$  Hz, 9H), 0.96 (d,  $J = 6.64$  Hz, 1H), 1.98-2.10 (m, 1H), 2.06 (s, 3H), 5.38 (dd,  $J = 5.64, 7.52$  Hz, 1H), 6.13 (d,  $J = 7.52$  Hz, 1H);  $^{13}\text{C}$  NMR ( $\text{CDCl}_3$ , 150 MHz):  $\delta$  3.10, 7.20, 17.72, 18.46, 21.19, 31.98, 83.61, 111.88, 145.87, 170.15. IR (film): 2956, 2874, 1741, 1368, 1227, 1004, 977, 721, 692  $\text{cm}^{-1}$ ; HRMS (ESI) for  $\text{C}_{14}\text{H}_{27}\text{IO}_2\text{SiNa}$   $[\text{M}+\text{Na}]^+$ : calcd 405.0723, found 405.0698.  $R_f = 0.35$  (5% ethyl acetate/95% hexanes).

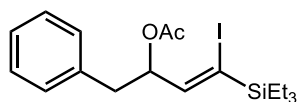

**25**

**(Z)-4-Iodo-1-phenyl-4-(triethylsilyl)but-3-en-2-yl acetate.** Column chromatography on silica gel (eluent: hexanes/ethyl acetate = 9:1) afforded the title product and the isomer in 68% yield as a colorless oil. *Z:E* ratio: 9:1.  $^1\text{H}$  NMR ( $\text{CDCl}_3$ , 600 MHz):  $\delta$  *Z*-isomer (major): 0.95 (t,  $J = 8.0$  Hz, 9H), 2.03 (s, 3H), 5.72 (qm,  $J = 6.4$  Hz, 1H), 6.18 (dm,  $J = 6.9$  Hz, 1H); *E*-isomer (minor): 0.78-0.82 (m, 3H), 0.91 (t,  $J = 7.9$  Hz, 9H), 2.01 (s, 3H), 2.85 (dd,  $J = 13.7, 6.2$  Hz, 1H), 5.45-5.49 (m, 1H), 7.20 (d,  $J = 8.0$  Hz, 2H); Overlap (major and minor): 0.68-0.72 (q), 2.94-3.04 (m), 7.23-7.26 (m), 7.28-7.33 (m);  $^{13}\text{C}$  NMR ( $\text{CDCl}_3$ , 150 MHz):  $\delta$  *Z*-isomer (major): 3.29, 7.13, 21.08, 39.37, 80.48, 111.10, 126.82, 128.39, 129.95, 136.60, 146.70, 169.79; *E*-isomer (minor): 4.94, 7.35, 41.35, 75.22, 112.62, 127.01, 128.59, 129.86, 136.17, 154.24. IR (film): 3028, 2953, 1741, 1369, 1227, 732, 698  $\text{cm}^{-1}$ ; HRMS (ESI) for  $\text{C}_{18}\text{H}_{27}\text{INaO}_2\text{Si}$   $[\text{M}+\text{Na}]^+$ : calcd 453.0723, found 453.0718.  $R_f = 0.56$  (major), 0.59 (minor) (10% ethyl acetate/90% hexanes).

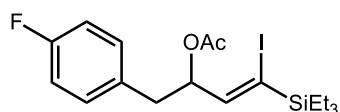

**26**

**(Z)-1-(4-Fluorophenyl)-4-iodo-4-(triethylsilyl)but-3-en-2-yl acetate.** Column chromatography on silica gel (eluent: hexanes/ethyl acetate = 5.7:1) afforded the title product and the isomer in 73% yield

as a yellow oil. *Z:E* ratio: 11:1. <sup>1</sup>H NMR (CDCl<sub>3</sub>, 600 MHz): δ *Z*-isomer (major): 2.01 (s, 3H), 5.65-5.68 (m, 1H), 6.14 (d, *J* = 7.0 Hz, 1H), 7.17-7.20 (m, 2H); *E*-isomer (minor): 0.77-0.82 (m, 3H), 1.99 (s, 3H), 2.80 (dd, *J* = 13.8, 6.3 Hz, 1H), 5.39-5.43 (m, 1H), 7.12-7.14 (m, 2H); Overlap (major and minor): 0.66-0.70 (m), 0.88-0.94 (m), 2.89-2.98 (m), 6.94-6.98 (m); <sup>13</sup>C NMR (CDCl<sub>3</sub>, 150 MHz): δ *Z*-isomer (major): 3.04, 7.12, 21.08, 38.39, 80.35, 111.28, 115.13 (d, *J* = 21.6 Hz), 131.28 (d, *J* = 7.8 Hz), 132.14 (d, *J* = 3.23 Hz), 146.30, 161.97 (d, *J* = 244.5 Hz), 169.79; *E*-isomer (minor): 4.71, 7.31, 40.36, 74.98, 112.82, 115.37 (d, *J* = 21.6 Hz), 131.20 (overlap with major), 153.83, 169.73; <sup>19</sup>F NMR (CDCl<sub>3</sub>, 564 MHz): δ -116.05 (*E*-isomer), -116.36 (*Z*-isomer). IR (film): 2954, 2875, 1740, 1509, 1222, 1019, 732 cm<sup>-1</sup>; HRMS (ESI) for C<sub>18</sub>H<sub>26</sub>FINaO<sub>2</sub>Si [M+Na]<sup>+</sup>: calcd 471.0628, found 471.0617. R<sub>f</sub> = 0.50 (both isomers, 10% ethyl acetate/90% hexanes).

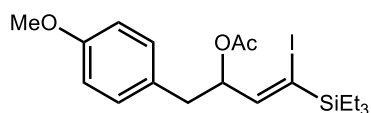

**27**

**(*Z*)-4-Iodo-1-(4-methoxyphenyl)-4-(triethylsilyl)but-3-en-2-yl acetate.** Column chromatography on silica gel (eluent: hexanes/ethyl acetate = 9:1) afforded the title product in 67% yield as a yellow oil. *Z:E* ratio: >20:1. <sup>1</sup>H NMR (CDCl<sub>3</sub>, 600 MHz): δ 0.68 (q, *J* = 7.9 Hz, 6H), 0.92 (t, *J* = 7.9 Hz, 9H), 2.01 (s, 3H), 2.88-2.95 (m, 2H), 3.78 (s, 3H), 5.63-5.66 (m, 1H), 6.15 (d, *J* = 6.9 Hz, 1H), 6.81 (d, *J* = 8.6 Hz, 2H), 7.13 (d, *J* = 8.5 Hz, 2H); <sup>13</sup>C NMR (CDCl<sub>3</sub>, 150 MHz): δ 3.27, 7.11, 21.05, 38.45, 55.37, 80.62, 110.92, 113.95, 128.64, 130.84, 146.80, 158.76, 169.73. IR (film): 2953, 2874, 1739, 1512, 1228, 1020, 721 cm<sup>-1</sup>; HRMS (ESI) for C<sub>19</sub>H<sub>29</sub>INaO<sub>3</sub>Si [M+Na]<sup>+</sup>: calcd 483.0828, found 483.0827. R<sub>f</sub> = 0.46 (10% ethyl acetate/90% hexanes).

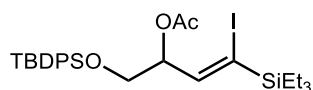

**28**

**(*Z*)-1-((*tert*-Butyldiphenylsilyl)oxy)-4-iodo-4-(triethylsilyl)but-3-en-2-yl acetate.** Column chromatography on silica gel (eluent: hexanes/ethyl acetate = 20:1) afforded the title product in 76% yield as a yellow oil. *Z:E* ratio: >20:1. <sup>1</sup>H NMR (CDCl<sub>3</sub>, 600 MHz): δ 0.70 (q, *J* = 8.0 Hz, 6H), 0.94 (t, *J* = 7.9 Hz, 9H), 1.04 (s, 9H), 2.05 (s, 3H), 3.79-3.85 (m, 2H), 5.64-5.66 (m, 1H), 6.33 (d, *J* = 7.0 Hz, 1H),

7.37-7.44 (m, 6H), 7.65-7.69 (m, 4H);  $^{13}\text{C}$  NMR ( $\text{CDCl}_3$ , 150 MHz):  $\delta$  3.26, 7.12, 19.41, 21.00, 26.90, 64.23, 80.45, 112.16, 127.81, 129.80, 129.83, 133.53, 133.63, 135.69, 135.79, 144.56, 169.78. IR (film): 3071, 2954, 2873, 1742, 1229, 1111  $\text{cm}^{-1}$ ; HRMS (ESI) for  $\text{C}_{28}\text{H}_{41}\text{INaO}_3\text{Si}_2$   $[\text{M}+\text{Na}]^+$ : calcd 631.1537, found 631.1524.  $R_f = 0.33$  (5% ethyl acetate/95% hexanes).

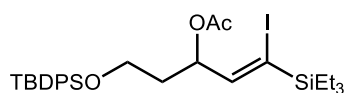

**29**

**(Z)-5-((tert-Butyldiphenylsilyl)oxy)-1-iodo-1-(triethylsilyl)pent-1-en-3-yl acetate.** Column chromatography on silica gel (eluent: hexanes/ethyl acetate = 5.7:1) afforded the title product and the isomer in 81% yield as a colorless oil. *Z:E* ratio: 4:1.  $^1\text{H}$  NMR ( $\text{CDCl}_3$ , 600 MHz):  $\delta$  *Z*-isomer (major): 0.69 (q,  $J = 7.8$  Hz, 6H), 1.87-1.93 (m, 1H), 3.71-3.75 (m, 2H), 5.65-5.68 (m, 1H), 6.18 (d,  $J = 6.9$  Hz, 1H); *E*-isomer (minor): 0.80-0.85 (m, 3H), 1.81-1.84 (m, 2H), 3.64-3.67 (m, 2H), 5.51-5.55 (m, 1H), 7.16 (d,  $J = 9.99$  Hz, 1H); Overlap (major and minor): 0.88-0.98 (m), 1.06 (s, minor), 1.07 (s, major), 1.98 (s, minor), 1.99 (s, major), 1.97-2.02 (m), 7.36-7.43 (m), 7.64-7.70 (m);  $^{13}\text{C}$  NMR ( $\text{CDCl}_3$ , 150 MHz):  $\delta$  *Z*-isomer (major): 3.05, 7.18, 19.33, 21.14, 27.00, 35.96, 59.74, 77.59, 109.90, 127.78, 129.71, 129.73, 133.83, 133.87, 135.75, 147.20, 169.92; *E*-isomer (minor): 4.65, 7.45, 19.23, 26.88, 37.59, 59.47, 71.88, 111.38, 127.82, 129.79, 129.81, 133.58, 133.61, 135.45, 135.69, 155.20. IR (film): 3070, 2953, 2874, 1742, 1427, 1228, 1110, 700  $\text{cm}^{-1}$ ; HRMS (ESI) for  $\text{C}_{29}\text{H}_{43}\text{INaO}_3\text{Si}_2$   $[\text{M}+\text{Na}]^+$ : calcd 645.1693, found 645.1687.  $R_f = 0.36$  (major), 0.44 (minor) (10% ethyl acetate/90% hexanes).

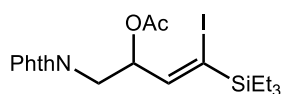

**30**

**(Z)-1-(1,3-Dioxoisindolin-2-yl)-4-iodo-4-(triethylsilyl)but-3-en-2-yl acetate.** Column chromatography on silica gel (eluent: hexanes/ethyl acetate = 5.7:1) afforded the title product in 60% yield as a colorless oil. *Z:E* ratio: >20:1.  $^1\text{H}$  NMR ( $\text{CDCl}_3$ , 600 MHz):  $\delta$  0.67 (qm,  $J = 5.7$  Hz, 6H), 0.90 (t,  $J = 7.8$  Hz, 9H), 2.02 (s, 3H), 3.95 (d,  $J = 6.2$  Hz, 2H), 5.82 (dt,  $J = 7.2, 6.2$  Hz, 1H), 6.25 (d,  $J = 7.3$  Hz, 1H), 7.69-7.74 (m, 2H), 7.81-7.86 (m, 2H);  $^{13}\text{C}$  NMR ( $\text{CDCl}_3$ , 100 MHz):  $\delta$  2.98, 7.12, 21.02, 39.31, 77.32, 114.21, 123.48, 132.09, 134.17, 143.59, 168.09, 169.86. IR (film): 2953, 2874, 1776, 1742, 1714,

1390, 1368, 1221, 1021, 720, 715  $\text{cm}^{-1}$ ; HRMS (ESI) for  $\text{C}_{20}\text{H}_{26}\text{INNaO}_4\text{Si}$   $[\text{M}+\text{Na}]^+$ : calcd 522.0573, found 522.0569.  $R_f = 0.5$  (25% ethyl acetate/75% hexanes).

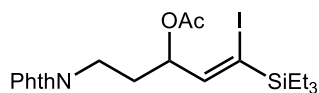

**31**

**(Z)-5-(1,3-Dioxoisindolin-2-yl)-1-iodo-1-(triethylsilyl)pent-1-en-3-yl acetate.** Column chromatography on silica gel (eluent: hexanes/ethyl acetate = 5.7:1) afforded the title product and the isomer in 72% yield as a yellow oil. *Z:E* ratio: 6:1.  $^1\text{H}$  NMR ( $\text{CDCl}_3$ , 600 MHz):  $\delta$  *Z*-isomer (major) 0.92 (t,  $J = 7.9$  Hz, 9H), 2.00 (s, 3H), 2.12-2.17 (m, 1H), 3.74-3.79 (m, 1H), 5.43-5.47 (m, 1H), 6.23 (d,  $J = 6.7$  Hz, 1H); *E*-isomer (minor): 0.74-0.78 (m, 3H), 0.85 (t,  $J = 7.7$  Hz, 9H), 2.06 (s, 3H), 3.67-3.71 (m, 1H), 5.18-5.22 (m, 1H), 7.12 (d,  $J = 9.4$  Hz, 1H); Overlap (major and minor) 0.65-0.69 (m), 2.03-2.09 (m), 3.82-3.88 (m), 7.69-7.72 (m), 7.83-7.85 (m);  $^{13}\text{C}$  NMR ( $\text{CDCl}_3$ , 150 MHz):  $\delta$  *Z*-isomer (major): 2.95, 7.12, 21.00, 31.36, 34.11, 78.19, 110.67, 123.35, 132.24, 134.06, 146.39, 168.22, 169.93; *E*-isomer (minor): 4.48, 7.28, 21.07, 33.14, 33.92, 72.00, 111.76, 123.38, 132.12, 134.14, 154.17, 168.16, 170.15. IR (film): 2953, 2874, 1772, 1741, 1710, 1394, 1369, 1226, 1005, 718  $\text{cm}^{-1}$ ; HRMS (ESI) for  $\text{C}_{21}\text{H}_{28}\text{INNaO}_4\text{Si}$   $[\text{M}+\text{Na}]^+$ : calcd 536.0730, found 536.0724.  $R_f = 0.42$  (both isomers, 25% ethyl acetate/75% hexanes).

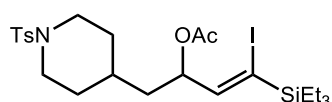

**32**

**(Z)-4-Iodo-1-(1-tosylpiperidin-4-yl)-4-(triethylsilyl)but-3-en-2-yl acetate.** Column chromatography on silica gel (eluent: hexanes/ethyl acetate = 5.7:1) afforded the title product and the isomer in 66% yield as a colorless oil. *Z:E* ratio: 7:1.  $^1\text{H}$  NMR ( $\text{CDCl}_3$ , 600 MHz):  $\delta$  *Z*-isomer (major): 0.67 (q,  $J = 7.9$  Hz, 6H), 0.91 (t,  $J = 7.9$  Hz, 9H), 1.83 (dd,  $J = 111.4, 2.9$  Hz, 2H), 2.01 (s, 3H), 2.43 (s, 3H), 5.50-5.53 (m, 1H), 6.13 (d,  $J = 6.8$  Hz, 1H); *E*-isomer (minor): 0.72-0.79 (m, 3H), 0.82-0.86 (m, 3H), 0.94 (t,  $J = 7.8$  Hz, 9H), 1.65-1.69 (m, 2H), 1.85 (d,  $J = 12.6$  Hz, 1H), 1.98 (s, 3H), 2.17 (s, 3H), 5.31-5.35 (m, 1H), 7.11 (d,  $J = 9.6$  Hz, 1H); Overlap (major and minor): 1.25-1.30 (m), 1.35-1.42 (m), 1.45-1.49 (m), 1.59-1.63 (m), 2.18-2.25 (m), 3.74-3.77 (m), 7.32 (d,  $J = 8.1$  Hz), 7.63 (d,  $J = 8.3$  Hz);  $^{13}\text{C}$  NMR ( $\text{CDCl}_3$ , 100 MHz):  $\delta$

*Z*-isomer (major): 2.96, 7.11, 21.18, 21.61, 31.06, 31.63, 32.24, 39.62, 46.34, 46.35, 77.94, 110.45, 127.82, 129.67, 133.34, 143.46, 147.09, 170.01; *E*-isomer (minor): 4.64, 7.40, 29.78, 30.99, 31.34, 41.40, 72.16, 111.61, 127.65, 129.89, 133.23, 143.54, 154.74. IR (film): 2952, 2874, 1737, 1229, 1163, 722, 548  $\text{cm}^{-1}$ ; HRMS (ESI) for  $\text{C}_{24}\text{H}_{38}\text{INNaO}_4\text{SSi}$   $[\text{M}+\text{Na}]^+$ : calcd 614.1233, found 614.1225.  $R_f = 0.54$  (both isomers, 25% ethyl acetate/75% hexanes).

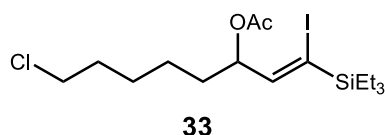

**(*Z*)-8-Chloro-1-iodo-1-(triethylsilyl)oct-1-en-3-yl acetate.** [General Procedure A](#). 10%  $\text{Mn}_2(\text{CO})_{10}$  catalyst and 0.5 equiv. KOAc were used instead of DIPEA. Column chromatography on silica gel (eluent: hexanes/ethyl acetate = 99:1) afforded the title product in 67% yield as a brown oil. *Z*:*E* ratio: >20:1.  $^1\text{H}$  NMR ( $\text{CDCl}_3$ , 600 MHz):  $\delta$  0.70 (q,  $J = 7.9$  Hz, 6H), 0.94 (t,  $J = 7.9$  Hz, 9H), 1.37-1.43 (m, 2H), 1.46-1.51 (m, 2H), 1.62-1.73 (m, 2H), 1.76-1.81 (m, 2H), 2.06 (s, 3H), 3.53 (t,  $J = 6.7$  Hz, 2H), 5.47-5.51 (m, 1H), 6.17 (d,  $J = 6.9$  Hz, 1H);  $^{13}\text{C}$  NMR ( $\text{CDCl}_3$ , 150 MHz):  $\delta$  3.05, 7.18, 21.25, 24.28, 26.84, 32.57, 33.13, 45.02, 79.87, 110.53, 147.14, 170.13. IR (film): 2952, 2874, 1740, 1457, 1370, 1231, 1018, 733  $\text{cm}^{-1}$ ; HRMS (ESI) for  $\text{C}_{16}\text{H}_{30}\text{ClINaO}_2\text{Si}$   $[\text{M}+\text{Na}]^+$ : calcd 467.0646 and 469.0616, found 467.0633 and 469.0616.  $R_f = 0.57$  (10% ethyl acetate/90% hexanes).

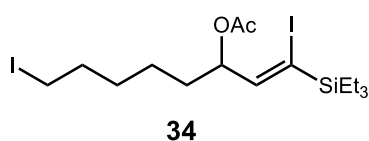

**(*Z*)-1,8-Diiodo-1-(triethylsilyl)oct-1-en-3-yl acetate.** [General Procedure A](#). 10%  $\text{Mn}_2(\text{CO})_{10}$  catalyst and 0.5 equiv. KOAc were used instead of DIPEA. Column chromatography on silica gel (eluent: hexanes/ethyl acetate = 98:2) provided the title product in 64% yield as a light yellow oil. *Z*:*E* ratio: >20:1.  $^1\text{H}$  NMR ( $\text{CDCl}_3$ , 400 MHz):  $\delta$  0.70 (q,  $J = 7.84$  Hz, 6H), 0.94 (t,  $J = 7.84$  Hz, 9H), 1.41 (m, 4 H), 1.66 (m, 2H), 1.83 (m, 2H), 2.06 (s, 3H), 3.18 (t,  $J = 7.09$  Hz, 2H), 5.48 (m, 1 H), 6.17 (d,  $J = 7.03$  Hz, 1 H);  $^{13}\text{C}$  NMR ( $\text{CDCl}_3$ , 100 MHz):  $\delta$  3.05, 6.89, 7.21, 21.28, 23.93, 30.43, 33.09, 33.45, 79.86, 110.55, 147.12, 170.13. IR (film): 2952, 2873, 1738, 1369, 1228, 1004, 721, 692  $\text{cm}^{-1}$ ; HRMS (ESI) for  $\text{C}_{16}\text{H}_{30}\text{I}_2\text{O}_2\text{SiNa}$   $[\text{M}+\text{Na}]^+$ : calcd 559.0002, found 558.9973.  $R_f = 0.33$  (5% ethyl acetate/95% hexanes).

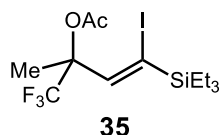

**(Z)-1,1,1-Trifluoro-4-iodo-2-methyl-4-(triethylsilyl)but-3-en-2-yl acetate.** To an 8 mL vial was added the premade  $\alpha$ -acyloxy iodide (0.5 mmol), DCM (0.5 mL) and DIPEA (0.25 mmol) at 0 °C, then the mixture was stirred for another 15 min. After that triethylsilyl acetylene (2.5 mmol) and  $\text{Mn}_2(\text{CO})_{10}$  (0.025 mmol) were added to the mixture. The reaction mixture was degassed by chill-pump-thaw for 20 min, then irradiated with 90 W blue LED lamp at approximately 5 cm away from the light source. The reaction temperature was around 40 °C. After 2 h, the solvent was removed under vacuum and the crude product was purified by Column chromatography on silica gel (eluent: hexanes/ethyl acetate = 100:1) to afford the title product in 78% yield as a colorless oil. *Z:E* ratio: >20:1.  $^1\text{H}$  NMR ( $\text{CDCl}_3$ , 600 MHz):  $\delta$  0.71 (q,  $J = 7.8$  Hz, 6H), 0.94 (t,  $J = 7.8$  Hz, 9H), 1.83 (d,  $J = 0.6$  Hz, 3H), 2.19 (s, 3H), 6.56 (d,  $J = 0.6$  Hz, 1H);  $^{13}\text{C}$  NMR ( $\text{CDCl}_3$ , 150 MHz):  $\delta$  2.95, 6.82, 20.07, 21.34, 80.30 (q,  $J = 29.6$  Hz), 109.94, 124.07 (q,  $J = 283.4$  Hz), 139.55, 167.36. IR (film): 2952, 2873, 1758, 1367, 1226, 1159, 1104, 1004, 732  $\text{cm}^{-1}$ ; HRMS (ESI) for  $\text{C}_{13}\text{H}_{22}\text{F}_3\text{IO}_2\text{SiNa}$  [ $\text{M}+\text{Na}$ ] $^+$ : calcd 445.0284, found 445.0285.  $R_f = 0.35$  (5% ethyl acetate/95% hexanes).

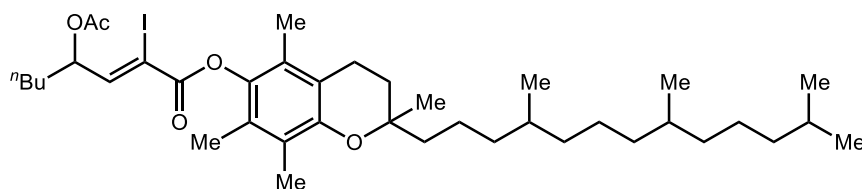

**(Z)-38**

**(Z)-2,5,7,8-Tetramethyl-2-(4,8,12-trimethyltridecyl)chroman-6-yl 4-acetoxy-2-iodooct-2-enoate.** Column chromatography on silica gel (eluent: hexanes/ethyl acetate = 200:1-150:1-100:1) afforded the title product and the isomer in 63% yield as a colorless oil. *Z:E* ratio: 1.6:1.  $^1\text{H}$  NMR ( $\text{CDCl}_3$ , 600 MHz):  $\delta$  0.84-0.87 (m, 12H), 0.94 (t,  $J = 7.2$  Hz, 3H), 1.04-1.16 (m, 6H), 1.20-1.45 (m, 19H), 1.50-1.57 (m, 3H), 1.72-1.84 (m, 4H), 1.97 (s, 3H), 2.01 (s, 3H), 2.09 (s, 3H), 2.11 (s, 3H), 2.59 (t,  $J = 6.0$  Hz, 2H), 5.51-5.54 (m, 1H), 7.41 (d,  $J = 7.8$  Hz, 1H);  $^{13}\text{C}$  NMR ( $\text{CDCl}_3$ , 150 MHz):  $\delta$  11.78, 12.15, 12.99, 13.87, 19.59, 19.62, 19.64, 19.68, 19.74, 20.60, 20.93, 21.02, 22.44, 22.61, 22.69, 23.63 (br), 24.22 (br), 24.44, 24.79, 27.00, 27.97, 31.15 (br), 32.40, 32.69, 32.72, 32.78, 32.80, 37.30, 37.35, 37.40, 37.42, 37.46, 37.49, 37.54, 37.57, 39.38, 39.58 (br), 40.45 (br), 75.16, 77.60, 92.60, 117.54, 123.23, 124.78, 126.54,

141.03, 149.69, 151.41, 161.10, 170.17. IR (film): 2924, 2863, 1741, 1459, 1373, 1200, 1072, 1020, 738  $\text{cm}^{-1}$ ; HRMS (ESI) for  $\text{C}_{39}\text{H}_{63}\text{IO}_5\text{Na}$   $[\text{M}+\text{Na}]^+$ : calcd 761.3618, found 761.3636.  $R_f = 0.35$  (5% ethyl acetate/95% hexanes).

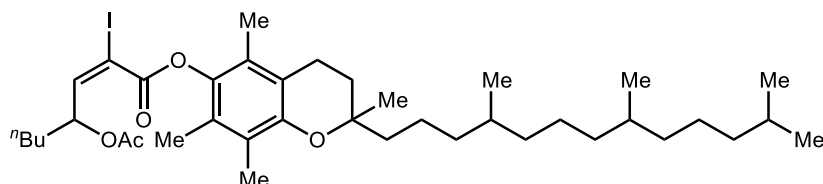

**(E)-38**

**(E)-2,5,7,8-Tetramethyl-2-(4,8,12-trimethyltridecyl)chroman-6-yl 4-acetoxy-2-iodooct-2-enoate.**  $^1\text{H}$  NMR ( $\text{CDCl}_3$ , 600 MHz):  $\delta$  0.84-0.88 (m, 15H), 1.06-1.16 (m, 6H), 1.21-1.44 (m, 19H), 1.49-1.60 (m, 3H), 1.66-1.84 (m, 4H), 2.04 (br, 3H), 2.07 (s, 3H), 2.08 (br, 3H), 2.10 (s, 3H), 2.60 (t,  $J = 6.6$  Hz, 2H), 5.88-5.92 (m, 1H), 6.90 (d,  $J = 8.4$  Hz, 1H);  $^{13}\text{C}$  NMR ( $\text{CDCl}_3$ , 100 MHz):  $\delta$  11.80, 12.19, 13.04, 13.88, 19.57, 19.61, 19.63, 19.67, 19.73, 20.58, 20.97, 21.01, 22.44, 22.61, 22.70, 23.67 (br), 24.11 (br), 24.43, 24.79, 27.15, 27.96, 31.08, 32.69, 32.75, 33.25, 37.27, 37.38, 37.43, 37.51, 37.53, 39.36, 39.62 (br), 40.40 (br), 73.76, 75.11, 84.90, 117.52, 123.24, 124.86, 126.60, 140.63, 149.72, 155.55, 161.64, 170.15. IR (film): 2924, 2861, 1743, 1459, 1374, 1228, 1188, 1107, 1017, 972  $\text{cm}^{-1}$ ; HRMS (ESI) for  $\text{C}_{39}\text{H}_{63}\text{IO}_5\text{Na}$   $[\text{M}+\text{Na}]^+$ : calcd 761.3618, found 761.3591.  $R_f = 0.40$  (5% ethyl acetate/95% hexanes).

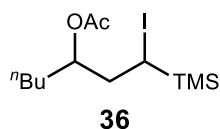

**36**

**1-Iodo-1-(trimethylsilyl)heptan-3-yl acetate.** [General Procedure B](#). 5%  $\text{Mn}_2(\text{CO})_{10}$  was used. Column chromatography on silica gel (eluent: hexanes/ethyl acetate = 100:1) afforded the title product of two isomers in 76% yield as a colorless oil. Ratio of the two isomers: 2:1.  $^1\text{H}$  NMR ( $\text{CDCl}_3$ , 600 MHz):  $\delta$  0.14 (s, minor), 0.15 (s, major), 0.87-0.91 (m, overlap), 1.26-1.32 (m, overlap), 1.43-1.66 (m, overlap), 1.75-1.88 (m, overlap), 2.04 (s, minor), 2.05 (s, major), 2.93 (dd,  $J = 12.0, 3.6$  Hz, minor), 3.07 (dd,  $J = 12.0, 3.0$  Hz, major), 5.06-5.12 (m, overlap);  $^{13}\text{C}$  NMR ( $\text{CDCl}_3$ , 150 MHz):  $\delta$  -2.29, -2.25, 13.89, 13.94, 14.93, 16.87, 21.13, 21.29, 22.55, 22.61, 26.82, 27.30, 31.86, 34.19, 37.50, 38.27, 74.81, 75.76, 170.42, 170.48. IR (film): 2954, 2858, 1736, 1372, 1232, 1020, 837  $\text{cm}^{-1}$ ; HRMS (ESI) for  $\text{C}_{12}\text{H}_{15}\text{IO}_2\text{SiNa}$   $[\text{M}+\text{Na}]^+$ : calcd 379.0566, found 379.0538.  $R_f = 0.35$  (5% ethyl acetate/95% hexanes).

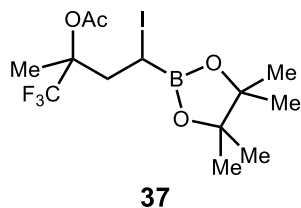

**1,1,1-Trifluoro-4-iodo-2-methyl-4-(4,4,5,5-tetramethyl-1,3,2-dioxaborolan-2-yl)butan-2-yl acetate.**

To an 8 mL vial was added the premade  $\alpha$ -acyloxy iodide (0.5 mmol), DCM (0.5 mL) and KOAc (0.25 mmol) at 0 °C, then the mixture was stirred for another 15 min. After that alkenyl boronate ester (1.0 mmol) and  $\text{Mn}_2(\text{CO})_{10}$  (0.025 mmol) were added to the mixture. The reaction mixture was degassed by chill-pump-thaw for 20 min, then irradiated with 90 W blue LED lamp at approximately 5 cm away from the light source. The reaction temperature was around 40 °C. After 2 h, the solvent was removed under vacuum and the crude product was purified by Column chromatography on silica gel (eluent: hexanes/ethyl acetate = 30:1 to 20:1) afforded the title product of two isomers in 36% yield as a colorless oil. Ratio of the two isomers: 1.3:1.  $^1\text{H}$  NMR ( $\text{CDCl}_3$ , 400 MHz):  $\delta$  1.25 (s, minor), 1.26 (s, major), 1.65-1.66 (m, overlap), 2.07 (s, minor), 2.10 (s, major), 2.66 (dd,  $J = 14.8, 4.0$ , minor), 2.77 (dd,  $J = 15.6, 10.4$ , major), 2.85-2.92 (m, minor), 2.98-3.03 (m, major), 3.35 (dd,  $J = 10.4, 3.6$ , major), 3.42-3.46 (m, minor);  $^{13}\text{C}$  NMR ( $\text{CDCl}_3$ , 100 MHz):  $\delta$  18.16, 18.83, 21.88, 22.07, 24.06, 24.23, 24.30, 24.34, 38.97, 39.55, 82.34 (q,  $J = 19$  Hz), 82.53 (q,  $J = 19$  Hz), 84.13, 84.16, 124.54 (q,  $J = 188.2$  Hz), 124.68 (q,  $J = 188.1$  Hz), 168.85. IR (film): 2980, 2933, 1752, 1382, 1372, 1158, 1142, 1097, 969, 865  $\text{cm}^{-1}$ ; HRMS (ESI) for  $\text{C}_{13}\text{H}_{21}\text{BF}_3\text{IO}_4\text{Na}$   $[\text{M}+\text{Na}]^+$ : calcd 459.0427, found 459.0410.  $R_f = 0.25$  (9% ethyl acetate/91% hexanes).

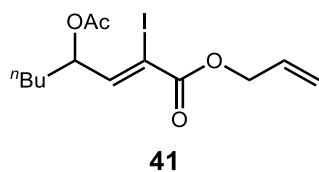

**(Z)-Allyl 4-acetoxy-2-iodooct-2-enoate.** [General Procedure B](#). Column chromatography on silica gel (eluent: hexanes/ethyl acetate = 30:1 to 20:1) afforded the title product and the isomer in 42% yield as a colorless oil. *Z:E* ratio: 11:1.  $^1\text{H}$  NMR ( $\text{CDCl}_3$ , 400 MHz):  $\delta$  0.91 (t,  $J = 7.6$  Hz, 3H), 1.31-1.40 (m, 4H), 1.63-1.76 (m, 2H), 2.07 (s, 3H), 2.56-2.65 (m, 2H), 4.69-4.71 (m, 2H), 5.27-5.30 (m, 1H), 5.36-5.45 (m, 2H), 5.90-6.00 (m, 1H), 7.19 (d,  $J = 8.0$  Hz, 1H);  $^{13}\text{C}$  NMR ( $\text{CDCl}_3$ , 100 MHz):  $\delta$  13.86, 20.92, 22.42,



26.91, 32.31, 67.41, 77.67, 94.10, 118.92, 131.41, 150.52, 162.08, 170.20. IR (film): 2957, 2930, 2861, 1718, 1370, 1220, 1020, 746  $\text{cm}^{-1}$ ; HRMS (ESI) for  $\text{C}_{13}\text{H}_{19}\text{IO}_4\text{Na}$   $[\text{M}+\text{Na}]^+$ : calcd 389.0226, found 389.0205.  $R_f = 0.25$  (9% ethyl acetate/91% hexanes).

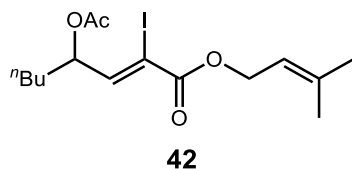

**(Z)-3-Methylbut-2-en-1-yl 4-acetoxy-2-iodooct-2-enoate.** [General Procedure B.](#) Column chromatography on silica gel (eluent: hexanes/ethyl acetate = 30:1 to 20:1) afforded the title product and the isomer in 44% yield as a colorless oil. *Z:E* ratio: 7:1.  $^1\text{H}$  NMR ( $\text{CDCl}_3$ , 400 MHz):  $\delta$  0.91 (t,  $J = 7.2$  Hz, 3H), 1.31-1.40 (m, 4H), 1.63-1.76 (m, 2H), 1.73 (d,  $J = 0.8$  Hz, 3H), 1.77 (d,  $J = 0.8$  Hz, 3H), 2.07 (s, 3H), 4.70 (d,  $J = 7.2$  Hz, 2H), 5.36-5.45 (m, 2H), 7.15 (d,  $J = 7.6$  Hz, 1H);  $^{13}\text{C}$  NMR ( $\text{CDCl}_3$ , 100 MHz):  $\delta$  13.87, 18.12, 20.93, 22.43, 25.78, 26.92, 32.35, 63.83, 77.74, 94.98, 118.00, 139.85, 149.99, 162.45, 170.20. IR (film): 2960, 2933, 2861, 1713, 1370, 1219, 1017, 733  $\text{cm}^{-1}$ ; HRMS (ESI) for  $\text{C}_{15}\text{H}_{23}\text{IO}_4\text{Na}$   $[\text{M}+\text{Na}]^+$ : calcd 417.0539, found 417.0521.  $R_f = 0.25$  (9% ethyl acetate/91% hexanes). (06-65)

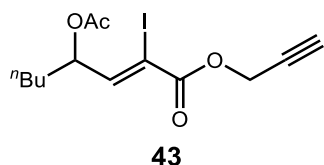

**(Z)-Prop-2-yn-1-yl 4-acetoxy-2-iodooct-2-enoate.** [General Procedure B.](#) Column chromatography on silica gel (eluent: hexanes/ethyl acetate = 30:1 to 20:1) afforded the title product and the isomer in 42% yield as a colorless oil. *Z:E* ratio: 8:1.  $^1\text{H}$  NMR ( $\text{CDCl}_3$ , 400 MHz):  $\delta$  0.92 (t,  $J = 7.6$  Hz, 3H), 1.30-1.42 (m, 4H), 1.62-1.79 (m, 2H), 2.08 (s, 3H), 2.53 (t,  $J = 2.4$  Hz, 1H), 4.81 (dd,  $J = 2.4, 0.8$  Hz, 2H), 5.39-5.44 (m, 1H), 7.23 (d,  $J = 7.6$  Hz, 1H);  $^{13}\text{C}$  NMR ( $\text{CDCl}_3$ , 100 MHz):  $\delta$  13.86, 20.91, 22.42, 26.93, 32.25, 54.19, 75.62, 76.96, 77.70, 93.08, 151.53, 161.70, 170.23. IR (film): 2955, 2933, 2858, 1725, 1369, 1219, 1032, 744  $\text{cm}^{-1}$ ; HRMS (ESI) for  $\text{C}_{13}\text{H}_{17}\text{IO}_4\text{Na}$   $[\text{M}+\text{Na}]^+$ : calcd 387.0069, found 387.0047.  $R_f = 0.25$  (9% ethyl acetate/91% hexanes).

### Procedure for the synthesis of $\alpha$ -acetoxy halides.

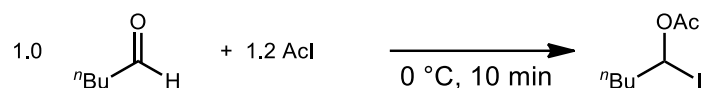

To an 8 mL vial was added acetyl iodide (98  $\mu\text{L}$ , 1.2 mmol) and pentanal (106  $\mu\text{L}$ , 1.0 mmol). The mixture was stirred at 0  $^\circ\text{C}$  for 10 minutes. The reaction mixture was quenched with  $\text{H}_2\text{O}$ , extracted with  $\text{CH}_2\text{Cl}_2$ , washed with  $\text{Na}_2\text{S}_2\text{O}_3$  (10% aq.), sat.  $\text{NaHCO}_3$  and dried over  $\text{Na}_2\text{SO}_4$ . Then the solvent was removed under vacuum to afford the product as a yellow liquid (210 mg, 82%).  $^1\text{H}$  NMR ( $\text{CDCl}_3$ , 600 MHz):  $\delta$  0.92 (t,  $J = 7.2$  Hz, 3H), 1.33-1.45 (m, 4H), 2.07 (s, 3H), 2.13-2.16 (m, 2H), 6.78 (t,  $J = 6.0$  Hz, 1H);  $^{13}\text{C}$  NMR ( $\text{CDCl}_3$ , 150 MHz):  $\delta$  13.82, 21.16, 21.60, 29.52, 41.59, 55.72, 168.51.

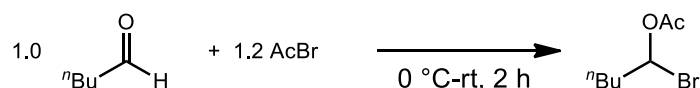

$\alpha$ -Acetoxy bromide was made from pentanal and acetyl bromide following the same procedure. Yield: 59%.  $^1\text{H}$  NMR ( $\text{CDCl}_3$ , 600 MHz):  $\delta$  0.92 (t,  $J = 7.2$  Hz, 3H), 1.32-1.48 (m, 4H), 2.10 (s, 3H), 2.06-2.14 (m, 2H), 6.59 (t,  $J = 6.0$  Hz, 1H).  $^{13}\text{C}$  NMR ( $\text{CDCl}_3$ , 100 MHz):  $\delta$  13.83, 20.96, 21.85, 27.90, 39.07, 76.40, 168.52. HRMS (ESI) for  $\text{C}_7\text{H}_{13}\text{BrO}_2\text{Na}$  [ $\text{M}+\text{Na}$ ] $^+$ : calcd 230.9997, found 230.9992.

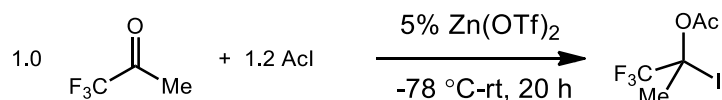

To an 8 mL vial was added acetyl iodide (0.82 mL, 12 mmol),  $\text{Zn}(\text{OTf})_2$  (364 mg, 1.0 mmol), and 1,1,1-trifluoroacetone (0.90 mL, 10 mmol) at -78  $^\circ\text{C}$ . Then the mixture was stirred at room temperature for 20 h. The reaction mixture was quenched with  $\text{H}_2\text{O}$ , extracted with  $\text{CH}_2\text{Cl}_2$ , washed with  $\text{Na}_2\text{S}_2\text{O}_3$  (10% aq.) and dried over  $\text{Na}_2\text{SO}_4$ . Then the solvent was removed under vacuum to afford the product as a light pink liquid (1.6 g, 57%).  $^1\text{H}$  NMR ( $\text{CDCl}_3$ , 400 MHz):  $\delta$  2.14 (s, 3H), 2.38 (q,  $J = 0.8$  Hz, 3H);  $^{13}\text{C}$  NMR ( $\text{CDCl}_3$ , 150 MHz):  $\delta$  22.07, 28.63, 60.93 (q,  $J = 32.8$  Hz), 122.52 (q,  $J = 279$  Hz), 167.28.

## Electrochemical Measurements

Cyclic voltammograms were recorded using a Gamry Reference 600 Potentiostat. A glassy carbon disk (3 mm diameter, CH Instrument, part # CHI104), Pt mesh, and nonaqueous Ag/Ag<sup>+</sup> electrode were used as the working, counter and reference electrode, respectively. The nonaqueous Ag/Ag<sup>+</sup> electrode was prepared in an electrode kit (CH instrument, part # CH112) in which a silver wire was immersed into an acetonitrile solution containing 0.01 M AgNO<sub>3</sub> and 0.1 M tetrabutylammonium perchlorate (TBAClO<sub>4</sub>). The electrolyte solution was 1 mM substrate/0.1 M LiClO<sub>4</sub> in anhydrous acetonitrile, and was bubbled with argon for 20 minutes prior the measurement. A scan rate of 10 mV/s was used. The potential of the reference electrode (0.30 V vs SCE) was calibrated using the redox potential of ferrocene as the standard ( $E^\circ(\text{Fc}^+/\text{Fc}) = 0.40 \text{ V vs SCE}$ ).

**Fig. S2:** Cyclic voltammogram of  $\alpha$ -acetoxy iodide

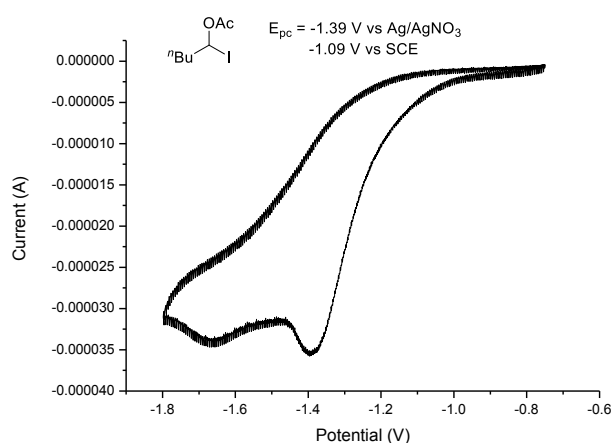

**Fig. S3:** Cyclic voltammogram of  $\alpha$ -acetoxy bromide

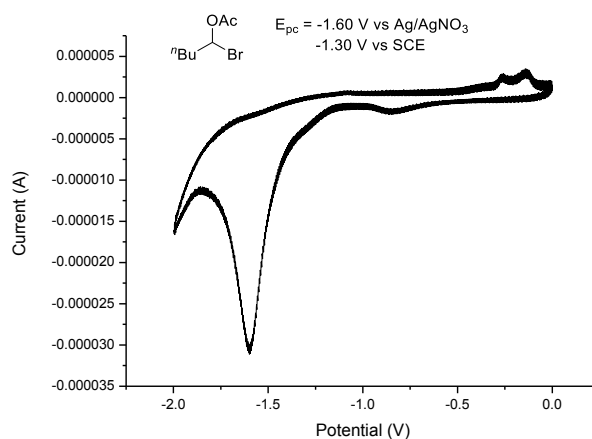

## Mechanistic investigations

### a. Origin of *Z*-selectivity: Time study and isomerization.

**Table S2: Time study** According to [procedure A](#) (When triethylsilyl acetylene was used) and the [procedure B](#) (When methyl propiolate was used), the reaction was stopped at different time points. Isolated yields were obtained by column chromatography on silica gel. *Z:E* ratios were determined using purified products via <sup>1</sup>H NMR.

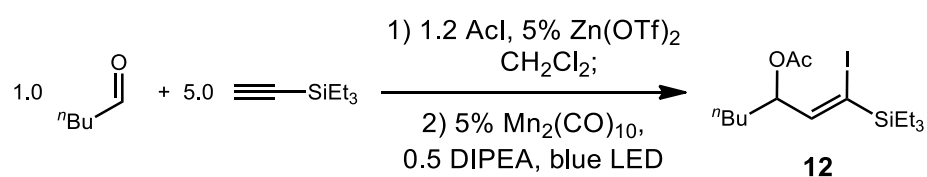

| entry    | time       | Yield      | <i>Z:E</i> (12) |
|----------|------------|------------|-----------------|
| 1        | 5 min      | 42%        | 6:1             |
| 2        | 15 min     | 71%        | 7:1             |
| 3        | 30 min     | 75%        | 9:1             |
| <b>4</b> | <b>2 h</b> | <b>78%</b> | <b>&gt;20:1</b> |

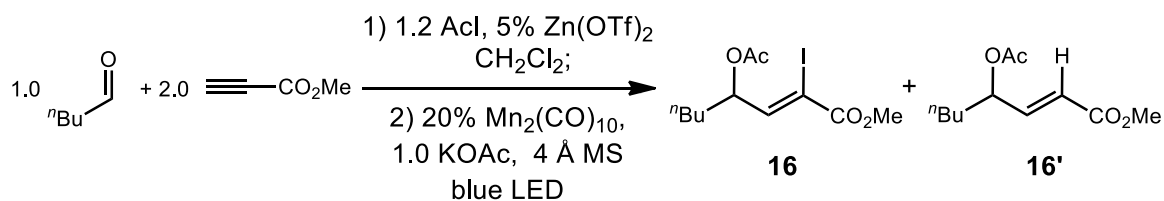

| entry    | time       | Yield (16:16')   | <i>Z:E</i> (16) |
|----------|------------|------------------|-----------------|
| 1        | 15 min     | 70%, >20:1       | 1:1             |
| 2        | 30 min     | 67%, >20:1       | 3:1             |
| 3        | 1 h        | 63%, >20:1       | 6:1             |
| <b>4</b> | <b>2 h</b> | <b>65%, 14:1</b> | <b>14:1</b>     |
| 5        | 5 h        | 58%, 8:1         | 12:1            |

**Fig. S4: Isomerization** According to the [procedure B](#), the 1:1 mixture of vinyl iodide **16** was resubjected to the standard condition for 2 h.

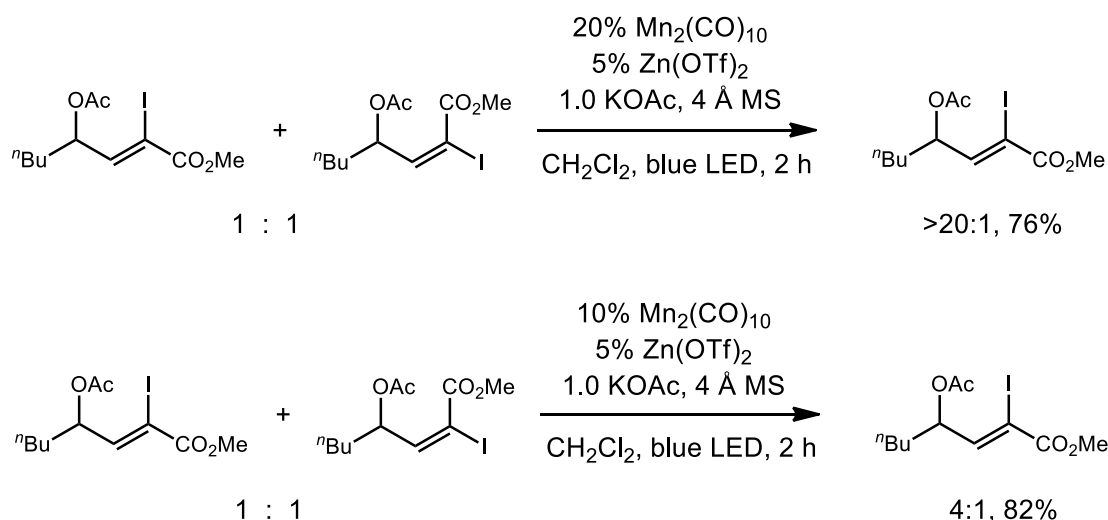

### b. Polarity of ketyl radical.

**Fig. S5:** Preferential reactivity with electron-deficient olefins

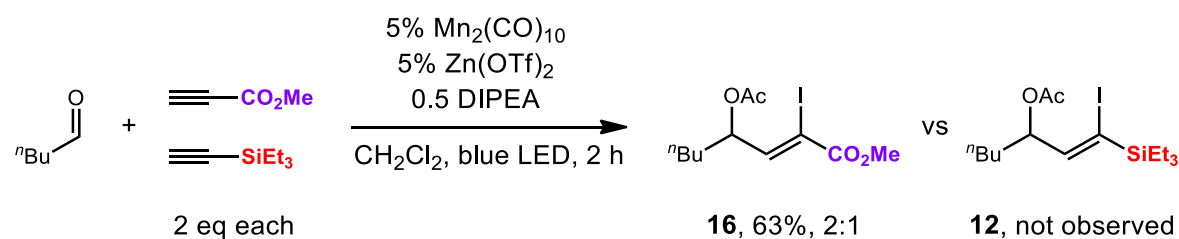

To an 8 mL vial was added DCM (0.5 mL), AcI (0.6 mmol), Zn(OTf)<sub>2</sub> (0.025 mmol) and aldehyde (0.5 mmol) consecutively at 0 °C. The mixture was stirred at the same temperature for 15 min. To this mixture was added DIPEA (0.25 mmol) at 0 °C, then the mixture was stirred for another 15 min. Triethylsilyl acetylene (1.0 mmol), methyl propiolate (1.0 mmol), and Mn<sub>2</sub>(CO)<sub>10</sub> (0.025 mmol) were added to the mixture. The reaction mixture was degassed by chill-pump-thaw for 20 min at -78 °C, then irradiated with one 90 W Blue LED lamp at approximately 5 cm away from the light source. After 2 h, the solvent was removed under vacuum and the crude product was purified by column chromatography on silica gel (eluent: hexanes/ethyl acetate = 98:2) to provide solely **16** in 63% yield. *Z:E* ratio: 2:1.

### c. Catalyst turnover: stoichiometric atom transfer is a viable mechanism.

To an 8 mL vial was added MeCN (0.5 mL), 4-methoxybenzenediazonium tetrafluoroborate (22.2 mg, 0.1 mmol), Mn(CO)<sub>5</sub>I (32.1 mg, 0.1 mmol) and eosin Y (1.2 mg, 0.001 mmol) consecutively at room temperature. The reaction mixture was degassed by chill-pump-thaw for 20 min, then irradiated with two

26 W CFL lamps (at approximately 5 cm away from the light source). After 20 h, the solvent was removed under vacuum and the crude product was purified by column chromatography on silica gel.  $^1\text{H}$  NMR ( $\text{CDCl}_3$ , 600 MHz):  $\delta$  3.78 (s, 3H), 6.67-6.70 (m, 2H), 7.54-7.57 (m, 2H);  $^{13}\text{C}$  NMR ( $\text{CDCl}_3$ , 100 MHz):  $\delta$  55.30, 82.66, 116.36, 138.18, 159.47.

**Table S3:** Stoichiometric atom transfer

| entry    | conditions                  | Yield      |
|----------|-----------------------------|------------|
| <b>1</b> | <b>No variation</b>         | <b>70%</b> |
| 2        | No eosin Y, light           | 43%        |
| 3        | No eosin Y, no light, rt    | 3%         |
| 4        | No eosin Y, no light, 50 °C | 68%        |

**\*Note:** The vial was covered by aluminum foil under no light condition.

#### d. Cascade reactions:

**Fig. S6:** Two components

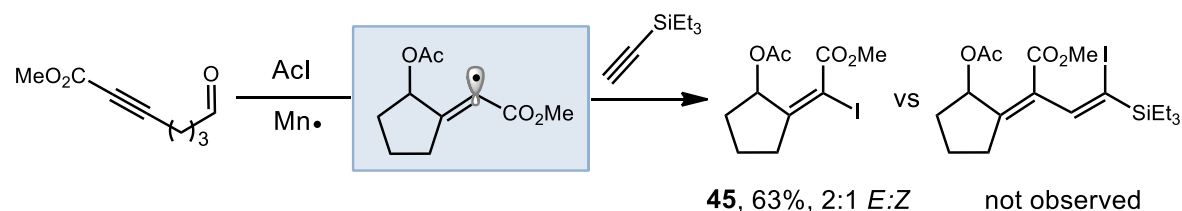

To an 8 mL vial was added DCM (0.5 mL), AcI (0.6 mmol),  $\text{Zn}(\text{OTf})_2$  (0.025 mmol) and aldehyde (0.5 mmol) consecutively at 0 °C. The mixture was stirred at the same temperature for 15 min. To this mixture was added DIPEA (0.25 mmol) at 0 °C, then the mixture was stirred for another 15 min. Triethylsilyl acetylene (2.5 mmol) and  $\text{Mn}_2(\text{CO})_{10}$  (0.025 mmol) was added to the mixture. The reaction was degassed by chill-pump-thaw for 20 min at -78 °C, then irradiated with one 90 W Blue LED lamp (at approximately 5 cm away from the light source). After 2 h, the crude product was purified by column chromatography on silica gel (eluent: hexanes/ethyl acetate = 95:5) to provide solely **45** in 63% yield as a light yellow oil. *E:Z* ratio: 2:1.

**\*Note:** Same yield and selectivity were obtained without triethylsilyl acetylene.

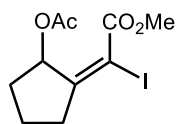

**(E)-45**

**(E)-methyl 2-(2-acetoxycyclopentylidene)-2-iodoacetate.**  $^1\text{H}$  NMR ( $\text{CDCl}_3$ , 400 MHz):  $\delta$  1.70-1.81 (m, 1H), 2.02 (s, 3H), 1.84-2.04 (m, 2 H), 2.08-2.18 (m, 1H), 2.37-2.48 (td,  $J = 7.82, 18.97$  Hz, 1H), 2.61-2.72 (m, 1H), 3.76 (s, 3H), 5.99 (m, 1H);  $^{13}\text{C}$  NMR ( $\text{CDCl}_3$ , 150 MHz):  $\delta$  21.03, 21.85, 35.60, 42.00, 53.34, 74.43, 162.91, 164.01, 169.89. IR (film): 1705, 1226, 1021, 756  $\text{cm}^{-1}$ ; HRMS (ESI) for  $\text{C}_{10}\text{H}_{13}\text{IO}_4\text{Na}$   $[\text{M}+\text{Na}]^+$ : calcd 346.9756, found 346.9728.  $R_f = 0.23$  (10% ethyl acetate/90% hexanes).

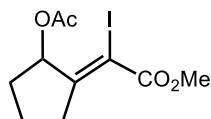

**(Z)-45**

**(Z)-Methyl 2-(2-acetoxycyclopentylidene)-2-iodoacetate.**  $^1\text{H}$  NMR ( $\text{CDCl}_3$ , 600 MHz):  $\delta$  1.83-2.04 (m,  $J = 4\text{H}$ ), 2.10 (s, 3H), 2.73 (m, 1 H), 2.93-3.00 (m, 1H), 3.81 (s, 3H), 5.56 (m, 1H);  $^{13}\text{C}$  NMR ( $\text{CDCl}_3$ , 150 MHz):  $\delta$  21.09, 24.91, 33.19, 35.52, 53.35, 82.28, 85.83, 164.40, 164.46, 170.29. IR (film): 2952, 1736, 1709, 1220, 1030  $\text{cm}^{-1}$ ; HRMS (ESI) for  $\text{C}_{10}\text{H}_{13}\text{IO}_4\text{Na}$   $[\text{M}+\text{Na}]^+$ : 346.9756, found 346.9744.  $R_f = 0.31$  (10% ethyl acetate/90% hexanes)

**Fig. S7:** Three components

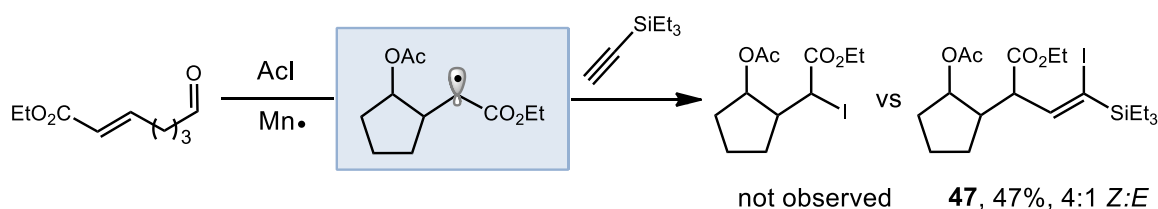

To an 8 mL vial was added DCM (0.5 mL), AcI (0.6 mmol),  $\text{Zn}(\text{OTf})_2$  (0.025 mmol) and aldehyde (0.5 mmol) consecutively at 0 °C. The mixture was stirred at the same temperature for 15 min. To this mixture was added DIPEA (0.25 mmol) at 0 °C, then the mixture was stirred for another 15 min. Triethylsilyl acetylene (2.5 mmol) and  $\text{Mn}_2(\text{CO})_{10}$  (0.025 mmol) was added to the mixture. The reaction was degassed by chill-pump-thaw for 20 min at -78 °C, then irradiated with one 90 W Blue LED lamp (at approximately 5 cm away from the light source). After 2 h, the crude product was purified by column chromatography on silica gel (eluent: hexanes/ethyl acetate = 95:5) to afford product **47** of several

isomers in 47% yield as a colorless oil.

**(Z)-Ethyl 2-(2-acetoxycyclopentyl)-4-iodo-4-(triethylsilyl)but-3-enoate.**

First fraction (22% yield, containing two isomers):  $R_f = 0.30$  (9% ethyl acetate/91% hexanes). Ratio of the two *Z* isomers: 3:1, *Z:E* ratio of the major isomers > 20:1.  $^1\text{H NMR}$  ( $\text{CDCl}_3$ , 400 MHz):  $\delta$  0.64-0.71 (q, overlap), 0.89-0.93 (t, overlap), 1.22-1.26 (t, overlap), 1.60-1.92 (m, overlap), 1.98 (s), 2.05 (s), 2.32-2.40 (m), 2.46-2.53 (m), 3.57 (t,  $J = 8.8$  Hz), 3.72 (dd,  $J = 10.8, 8.8$  Hz), 4.11-4.17 (q, overlap), 4.89-4.93 (m), 4.99 (t,  $J = 5.2$  Hz), 6.08 (d,  $J = 8.8$  Hz), 6.21 (d,  $J = 9.2$  Hz);  $^{13}\text{C NMR}$  ( $\text{CDCl}_3$ , 100 MHz):  $\delta$  3.00, 3.01, 6.97, 7.02, 14.17, 14.19, 21.25, 21.83, 22.04, 22.84, 27.63, 28.29, 32.27, 32.57, 46.03, 47.15, 55.70, 57.67, 60.78, 60.81, 76.16, 78.38, 112.60, 113.67, 144.55, 144.98, 170.29, 170.34, 171.52, 171.85. IR (film): 2953, 2874, 1731, 1370, 1235, 1148, 1017, 732  $\text{cm}^{-1}$ ; HRMS (ESI) for  $\text{C}_{19}\text{H}_{33}\text{IO}_4\text{SiNa}$   $[\text{M}+\text{Na}]^+$ : calcd 503.1090, found 503.1067.

Second fraction (25% yield, containing three isomers):  $R_f = 0.25$  (9% ethyl acetate/91% hexanes). Ratio of the two *Z* isomers: 4:1, *Z:E* ratio of the major isomers 4:1.  $^1\text{H NMR}$  ( $\text{CDCl}_3$ , 400 MHz):  $\delta$  0.66-0.87 (q, overlap), 0.90-1.00 (t, overlap), 1.18-1.26 (t, overlap), 1.53-1.97 (m, overlap), 1.98 (s), 2.00 (s), 2.06 (s), 2.21-2.30 (m), 2.32-2.40 (m), 2.43-2.50 (m), 3.30 (t,  $J = 10.8$  Hz), 3.61 (t,  $J = 8.8$  Hz), 3.79 (dd,  $J = 10.4, 9.2$  Hz), 4.05-4.16 (q, overlap), 4.90-4.94 (m), 5.10-5.13 (m), 5.15-5.18 (m), 6.04 (d,  $J = 9.2$  Hz), 6.13 (d,  $J = 9.2$  Hz), 7.13 (d,  $J = 11.2$  Hz);  $^{13}\text{C NMR}$  ( $\text{CDCl}_3$ , 100 MHz):  $\delta$  3.00, 3.01, 4.78, 7.02, 7.27, 7.31, 14.04, 14.07, 14.10, 20.98, 21.15, 21.23, 21.90, 22.02, 22.56, 27.48, 27.55, 28.20, 32.03, 32.64, 32.74, 45.82, 47.05, 51.20, 55.29, 57.20, 60.79, 60.85, 60.92, 76.05, 76.12, 78.30, 109.82, 112.66, 113.48, 144.32, 145.13, 153.12, 170.04, 170.43, 171.27, 171.66, 172.02. IR (film): 2953, 2874, 1732, 1370, 1236, 1149, 1019, 723  $\text{cm}^{-1}$ ; HRMS (ESI) for  $\text{C}_{19}\text{H}_{33}\text{IO}_4\text{SiNa}$   $[\text{M}+\text{Na}]^+$ : calcd 503.1090, found 503.1080. (06-188, 204, 201)

**e. Unlikely propagation pathway**

**Fig. S8:** Stoichiometric experiment

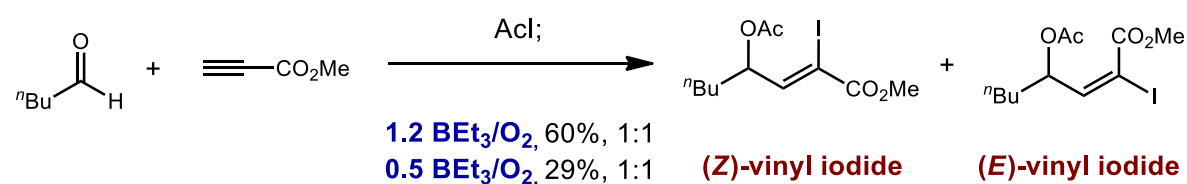

To an 8 mL vial was added aldehyde (53  $\mu\text{L}$ , 0.5 mmol) and AcI (50  $\mu\text{L}$ , 0.6 mmol). The mixture was



stirred at 0 °C for 15 min. To this mixture was added CH<sub>2</sub>Cl<sub>2</sub> (0.5 mL), methyl propiolate (89 μL, 1.0 mmol), iodoethane (201 μL, 2.5 mmol) and BEt<sub>3</sub> (0.6 mL, 0.6 mmol, 1.0 M in hexanes) at 0 °C. Then O<sub>2</sub> (11.2 mL, 0.5 mmol) was bubbled through the solution via syringe pump (12 mL/h) at 0 °C. After the addition was finished, the reaction was warmed up to room temperature and stirred for another 2 hours. Then the solvent was removed under vacuum and the crude product was purified by column chromatography on silica gel. *Z:E* ratios were determined using purified products via <sup>1</sup>H NMR.

**Hypothesis:** The yield should be lower when catalytic BEt<sub>3</sub> was used compared with the stoichiometric case to support a non-propagative mechanism.

**Result:** Stoichiometric BEt<sub>3</sub> (1.2 equiv.) yielded 60% of the desired product while substoichiometric BEt<sub>3</sub> (0.5 equiv.) provided only 29% of the desired product indicating propagation pathway is unlikely.

**Fig. S9:** Competition experiment

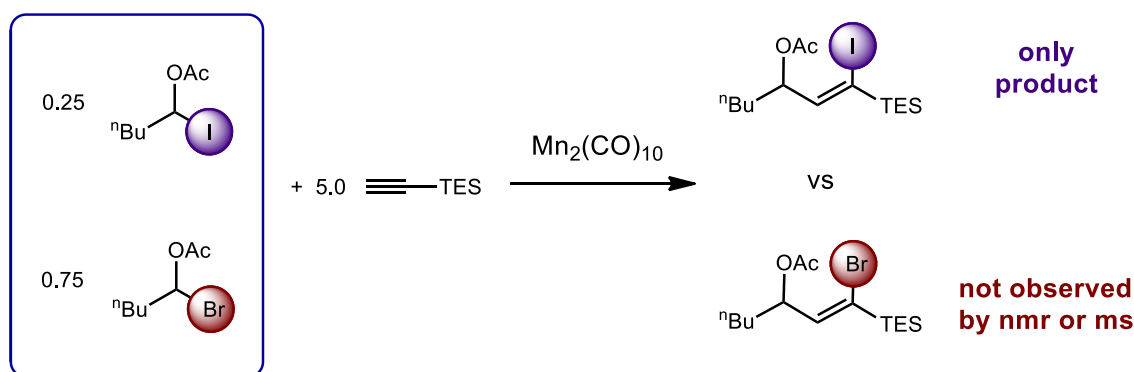

To an 8 mL vial was added DCM (0.5 mL),  $\alpha$ -acetoxy bromide (0.125 mmol),  $\alpha$ -acetoxy iodide (0.375 mmol) and DIPEA (0.25 mmol) consecutively at 0 °C. The mixture was stirred for 15 min. Triethylsilyl acetylene (2.5 mmol) and Mn<sub>2</sub>(CO)<sub>10</sub> (0.025 mmol) were added to the mixture. The reaction mixture was degassed by chill-pump-thaw for 20 min, then irradiated with one 90 W blue LED lamp (Kessil A360WE tuna blue) at approximately 5 cm away from the light source. The reaction temperature was approximately 40 °C. After 2 h, the solvent was removed under vacuum and the crude product was detected by ESI-ms and purified by column chromatography on silica gel.

**Hypothesis:** The vinyl radical formed in the reaction is capable of abstracting a halogen atom from  $\alpha$ -acetoxy iodide or  $\alpha$ -acetoxy bromide. If a propagative mechanism is operative, both vinyl iodide and vinyl bromide should form.

**Result:** Only vinyl iodide was observed, which does not support an efficient propagation pathway.

**Synthetic manipulation of vinyl iodide: (59)**

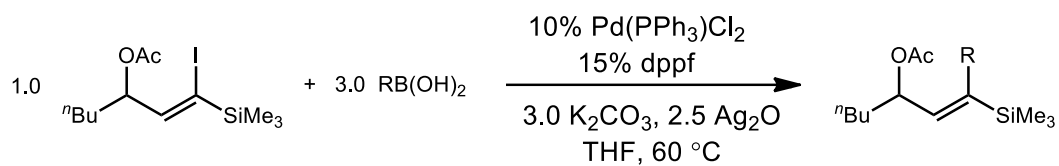

A suspension of boronic acid (3.0 equiv.), vinyl iodide (1.0 equiv.), Pd(PPh<sub>3</sub>)<sub>2</sub>Cl<sub>2</sub> (0.1 equiv.), dppf (0.15 equiv.), powdered K<sub>2</sub>CO<sub>3</sub> (3 equiv.), and Ag<sub>2</sub>O (2.5 equiv.) in THF was stirred under nitrogen at 60°C for 12 h in a sealed tube. The reaction was filtered and washed with diethyl ether. The organic layer was combined and concentrated under vacuum. The residue was purified by column chromatography on silica gel (eluent: hexanes/ethyl acetate = 100:1) to afford the product.

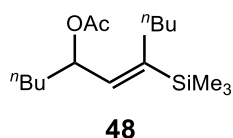

**(E)-7-(Trimethylsilyl)undec-6-en-5-yl acetate.** Column chromatography on silica gel (eluent: hexanes/ethyl acetate = 100:1) afforded the title product in 77% yield as a colorless oil. <sup>1</sup>H NMR (CDCl<sub>3</sub>, 400 MHz): δ 0.08 (s, 9H), 0.89 (t, *J* = 7.2 Hz, 3H), 0.92 (t, *J* = 7.2 Hz, 3H), 1.20-1.38 (m, 8H), 1.44-1.52 (m, 1H), 1.61-1.70 (m, 1H), 2.03 (s, 3H), 2.10-2.19 (m, 1H), 2.22-2.29 (m, 1H), 5.56-5.64 (m, 2H); <sup>13</sup>C NMR (CDCl<sub>3</sub>, 100 MHz): δ -1.22, 13.95, 21.39, 22.54, 23.11, 27.31, 30.12, 32.54, 34.65, 70.54, 137.13, 145.66, 170.31. IR (film): 2956, 2931, 2861, 1736, 1369, 1234, 1015, 833, 752 cm<sup>-1</sup>; HRMS (ESI) for C<sub>16</sub>H<sub>32</sub>O<sub>2</sub>SiNa [M+Na]<sup>+</sup>: calcd 307.2069, found 307.2066. R<sub>f</sub> = 0.4 (5% ethyl acetate/95% hexanes).

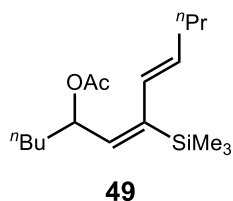

**(6E, 8E)-7-(Trimethylsilyl)dodeca-6,8-dien-5-yl acetate.** Column chromatography on silica gel (eluent: hexanes/ethyl acetate = 100:1) afforded the title product in 73% yield as a yellow oil. <sup>1</sup>H NMR (600 MHz, CDCl<sub>3</sub>): δ 6.33 (d, *J* = 15.9 Hz, 1H), 5.72 (q, *J* = 7.2 Hz, 1H), 5.66-5.61 (m, 1H), 5.53 (d, *J* = 8.5 Hz, 1H), 2.08 (q, *J* = 7.2 Hz, 2H), 2.03 (s, 3H), 1.68-1.62 (m, 1H), 1.53-1.47 (m, 1H), 1.45-1.39 (m, 2H), 1.33-1.21 (m, 4H), 0.91 (t, *J* = 7.4 Hz, 3H), 0.88 (t, *J* = 7.1 Hz, 3H), 0.13 (s, 9H); <sup>13</sup>C NMR (150 MHz, CDCl<sub>3</sub>): δ 170.32, 142.51, 137.69, 134.46, 128.53, 71.40, 35.68, 34.67, 27.36, 22.79, 22.65, 21.41,

14.01, 13.70, -0.59. IR (film): 2958, 2862, 1738, 1370, 1235, 1018, 837  $\text{cm}^{-1}$ ; HRMS (ESI) for  $\text{C}_{17}\text{H}_{32}\text{NaO}_2\text{Si}$   $[\text{M}+\text{Na}]^+$ : calcd 319.2069, found 319.2051.  $R_f = 0.36$  (3% ethyl acetate in hexanes).

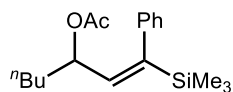

**50**

**(E)-1-Phenyl-1-(trimethylsilyl)hept-1-en-3-yl acetate.** Column chromatography on silica gel (eluent: hexanes/ethyl acetate = 100:1) afforded the title product in 62% yield as a brown oil.  $^1\text{H}$  NMR ( $\text{CDCl}_3$ , 400 MHz):  $\delta$  7.31-7.27 (m, 2H), 7.20-7.16 (m, 1H), 6.95-6.93 (m, 2H), 5.82 (d,  $J = 8.2$  Hz, 1H), 5.15-5.10 (m, 1H), 1.98 (s, 3H), 1.60-1.52 (m, 1H), 1.47-1.38 (m, 1H), 1.21-1.13 (m, 4H), 0.83-0.80 (m, 3H), 0.06 (s, 9H);  $^{13}\text{C}$  NMR ( $\text{CDCl}_3$ , 150 MHz):  $\delta$  170.01, 148.11, 141.48, 138.65, 128.16, 127.50, 125.87, 72.64, 34.53, 27.22, 22.49, 21.30, 13.91, -1.69. IR (film): 2957, 2861, 1739, 1370, 1246, 836  $\text{cm}^{-1}$ ; HRMS (ESI) for  $\text{C}_{18}\text{H}_{28}\text{O}_2\text{SiNa}$   $[\text{M}+\text{Na}]^+$ : calcd 327.1757, found 327.1740.  $R_f = 0.47$  (5% ethyl acetate/95% hexanes).

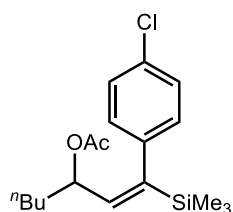

**51**

**(E)-1-(4-Chlorophenyl)-1-(trimethylsilyl)hept-1-en-3-yl acetate.** Column chromatography on silica gel (eluent: hexanes/ethyl acetate = 100:1) afforded the title product in 72% yield as a brown oil.  $^1\text{H}$  NMR ( $\text{CDCl}_3$ , 400 MHz):  $\delta$  7.27 (d,  $J = 8.4$  Hz, 2H), 6.89 (d,  $J = 8.3$  Hz, 2H), 5.81 (d,  $J = 8.3$  Hz, 1H), 5.07 (q,  $J = 7.2$  Hz, 1H), 1.98 (s, 3H), 1.61-1.52 (m, 1H), 1.45-1.38 (m, 1H), 1.21-1.14 (m, 4H), 0.84-0.81 (m, 3H), 0.05 (s, 9H);  $^{13}\text{C}$  NMR ( $\text{CDCl}_3$ , 150 MHz):  $\delta$  169.98, 146.95, 140.01, 139.38, 132.00, 128.92, 128.45, 72.57, 34.49, 27.25, 22.51, 21.22, 13.87, -1.72. IR (film): 2956, 2861, 1738, 1487, 1370, 1234, 1015, 838  $\text{cm}^{-1}$ ; HRMS (ESI) for  $\text{C}_{18}\text{H}_{27}\text{O}_2\text{ClSiNa}$   $[\text{M}+\text{Na}]^+$ : calcd 361.1367, found 361.1337.  $R_f = 0.4$  (5% ethyl acetate/95% hexanes).

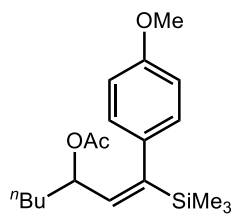

**52**

**(E)-1-(4-Methoxyphenyl)-1-(trimethylsilyl)hept-1-en-3-yl acetate.** Column chromatography on silica gel (eluent: hexanes/ethyl acetate = 100:1) afforded the title product in 56% yield as a brown oil.  $^1\text{H}$  NMR ( $\text{CDCl}_3$ , 400 MHz):  $\delta$  6.88-6.83 (m, 4H), 5.80 (d,  $J = 8.3$  Hz, 1H), 5.18-5.13 (m, 1H), 3.80 (s, 3H), 1.99 (s, 3H), 1.61-1.52 (m, 1H), 1.46-1.38 (m, 1H), 1.20-1.13 (m, 4H), 0.84-0.80 (m, 3H), 0.05 (s, 9H);  $^{13}\text{C}$  NMR ( $\text{CDCl}_3$ , 100 MHz):  $\delta$  170.06, 158.02, 147.68, 138.89, 133.60, 128.51, 113.78, 72.66, 55.31, 34.51, 27.22, 22.51, 21.35, 13.93, -1.67. IR (film): 2955, 2860, 1737, 1506, 1239, 1035, 837  $\text{cm}^{-1}$ ; HRMS (ESI) for  $\text{C}_{19}\text{H}_{30}\text{O}_3\text{ClSiNa}$   $[\text{M}+\text{Na}]^+$ : calcd 357.1862, found 357.184.  $R_f = 0.46$  (10% ethyl acetate in hexanes).

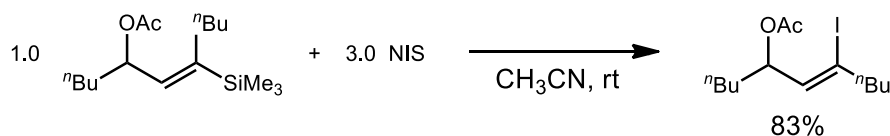

According to the known literature procedure (60), the vinylsilane (42.7 mg, 0.15 mmol) was dissolved in acetonitrile (4 mL) at room temperature and treated with NIS (67.5 mg, 0.3 mmol). The reaction was stirred for 18 h and another portion of NIS (33.7 mg, 0.15 mmol) was added to fully consume the starting material. After 2 h the mixture was washed with saturated aqueous  $\text{Na}_2\text{SO}_3$  and dried over  $\text{Na}_2\text{SO}_4$ . The solvent was removed under vacuum and the residue was purified by column chromatography on silica gel (eluent: hexanes/ethyl acetate = 100:1) to afford product in 83% yield as a pale yellow oil.  $^1\text{H}$  NMR ( $\text{CDCl}_3$ , 400 MHz):  $\delta$  0.90 (t,  $J = 7.2$  Hz, 3H), 0.91 (t,  $J = 7.2$  Hz, 3H), 1.25-1.39 (m, 6H), 1.47-1.54 (m, 2H), 1.57-1.72 (m, 2H), 2.04 (s, 3H), 2.46-2.50 (m, 2H), 5.34-5.39 (m, 1H), 5.56 (dt,  $J = 1.2, 8.0$  Hz, 1H);  $^{13}\text{C}$  NMR ( $\text{CDCl}_3$ , 100 MHz):  $\delta$  13.79, 13.94, 21.14, 21.27, 22.53, 26.96, 31.30, 33.53, 45.09, 78.71, 111.18, 133.47, 170.10. IR (film): 2956, 2930, 2860, 1739, 1370, 1231, 1018  $\text{cm}^{-1}$ ; HRMS (ESI) for  $\text{C}_{13}\text{H}_{23}\text{IO}_2\text{Na}$   $[\text{M}+\text{Na}]^+$ : calcd 361.0640, found 361.0623.  $R_f = 0.35$  (5% ethyl acetate/95% hexanes).

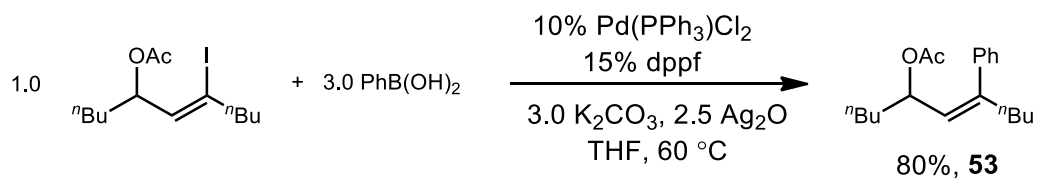

**(Z)-7-Phenylundec-6-en-5-yl acetate.** Column chromatography on silica gel (eluent: hexanes/ethyl acetate = 100:1) afforded the title product in 80% yield as a colorless oil.  $^1\text{H}$  NMR ( $\text{CDCl}_3$ , 400 MHz):  $\delta$  0.83 (t,  $J = 7.2$  Hz, 3H), 0.86 (t,  $J = 6.8$  Hz, 3H), 1.13-1.36 (m, 8H), 1.42-1.51 (m, 1H), 1.56-1.65 (m, 1H), 1.98 (s, 3H), 2.31-2.35 (m, 2H), 5.12-5.17 (m, 1H), 5.38 (dt,  $J = 1.2, 9.2$  Hz, 1H);  $^{13}\text{C}$  NMR ( $\text{CDCl}_3$ , 100 MHz):  $\delta$  13.86, 13.88, 21.30, 22.22, 22.39, 27.12, 29.82, 34.76, 39.15, 72.52, 125.27, 126.88, 127.96, 128.04, 140.44, 145.46, 170.01. IR (film): 2956, 2930, 2860, 1734, 1466, 1368, 1236, 1016, 701  $\text{cm}^{-1}$ ; HRMS (ESI) for  $\text{C}_{10}\text{H}_{28}\text{O}_2\text{Na}$   $[\text{M}+\text{Na}]^+$ : calcd 311.1987, found 311.1964.  $R_f = 0.33$  (5% ethyl acetate/95% hexanes).

## Computational studies:

**Table S4:** Density functional theory (DFT) calculations

DFT calculations were performed using Spartan '16. All geometries were optimized using the  $\omega$ B97X-D method with 6-31G\* basis set to determine homolytic bond dissociation enthalpies (BDE). All the optimizations were done using a CPCM implicit solvation model simulating THF.

### a. Bond Dissociation Enthalpy (BDE) Calculations

| Fragmentation Reaction                                                               | BDE (kcal/mol) |
|--------------------------------------------------------------------------------------|----------------|
| 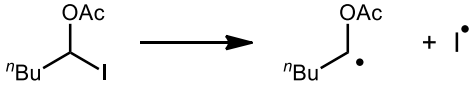    | 57.72          |
|     | 71.15          |
|    | 68.45          |
|  | 64.91          |
|  | 62.25          |
|  | 61.14          |

### b. Total energy

|                                                                                     | Total Energy (hartrees) | Total Energy (kcal/mol) |
|-------------------------------------------------------------------------------------|-------------------------|-------------------------|
| 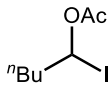 | -436.315478             | -273791.8893            |
|  | -424.852787             | -266598.9475            |
|  | -2998.8398              | -1881798.964            |

|                                                                                     |              |              |
|-------------------------------------------------------------------------------------|--------------|--------------|
| 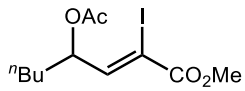   | -741.493982  | -465294.1472 |
|    | -730.01531   | -458090.4737 |
|    | -741.489455  | -465291.3064 |
|    | -730.01531   | -458091.1772 |
|    | -1040.220037 | -652747.4352 |
|    | -1028.75012  | -645549.9591 |
|  | -1040.213848 | -652743.5515 |
|  | -1028.745699 | -645547.1848 |
|  | -11.370712   | -7135.224116 |
|  | -2573.873636 | -1615128.871 |

c. Optimized Cartesian Coordinates

|                                                                                     | Cartesian Coordinates                                                               |     |            |            |            |
|-------------------------------------------------------------------------------------|-------------------------------------------------------------------------------------|-----|------------|------------|------------|
| 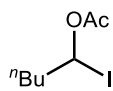   | 1 C                                                                                 | C1  | 1.5101045  | -0.3160772 | 0.4001013  |
|                                                                                     | 2 H                                                                                 | H3  | 1.1501530  | -1.2159342 | 0.8965908  |
|                                                                                     | 3 O                                                                                 | O1  | 1.6049600  | -0.4638942 | -0.9821028 |
|                                                                                     | 4 C                                                                                 | C2  | 1.7763165  | -1.6732930 | -1.5954651 |
|                                                                                     | 5 O                                                                                 | O2  | 1.8985647  | -1.6576480 | -2.7933824 |
|                                                                                     | 6 C                                                                                 | C3  | 1.7739362  | -2.9189994 | -0.7537552 |
|                                                                                     | 7 H                                                                                 | H1  | 2.5404205  | -2.8763738 | 0.0261353  |
|                                                                                     | 8 H                                                                                 | H5  | 1.9706202  | -3.7670456 | -1.4085311 |
|                                                                                     | 9 H                                                                                 | H6  | 0.8005966  | -3.0554573 | -0.2712727 |
|                                                                                     | 10 I                                                                                | I1  | 3.5446960  | -0.0548793 | 1.2576307  |
|                                                                                     | 11 C                                                                                | C4  | 0.6530543  | 0.8922460  | 0.7144158  |
|                                                                                     | 12 H                                                                                | H2  | 1.0929051  | 1.7811033  | 0.2493054  |
|                                                                                     | 13 H                                                                                | H4  | 0.6601502  | 1.0455801  | 1.7982992  |
|                                                                                     | 14 C                                                                                | C5  | -0.7850986 | 0.6910260  | 0.2231589  |
|                                                                                     | 15 H                                                                                | H7  | -0.7851145 | 0.5599299  | -0.8653458 |
|                                                                                     | 16 H                                                                                | H9  | -1.1942135 | -0.2327754 | 0.6551869  |
|                                                                                     | 17 C                                                                                | C6  | -1.6860288 | 1.8694335  | 0.5958551  |
|                                                                                     | 18 H                                                                                | H8  | -1.2627728 | 2.7925643  | 0.1788939  |
|                                                                                     | 19 H                                                                                | H10 | -1.6886433 | 1.9928380  | 1.6866815  |
|                                                                                     | 20 C                                                                                | C7  | -3.1177633 | 1.6885247  | 0.0944810  |
|                                                                                     | 21 H                                                                                | H11 | -3.1408690 | 1.5927170  | -0.9971957 |
|                                                                                     | 22 H                                                                                | H12 | -3.7457987 | 2.5416931  | 0.3713542  |
|                                                                                     | 23 H                                                                                | H13 | -3.5701753 | 0.7847214  | 0.5189607  |
|    | 1 C                                                                                 | C1  | 0.9676760  | -0.6195099 | -0.4775438 |
|                                                                                     | 2 H                                                                                 | H3  | 0.3697727  | -1.3233041 | -1.0519148 |
|                                                                                     | 3 O                                                                                 | O1  | 2.3313569  | -0.6652322 | -0.6748104 |
|                                                                                     | 4 C                                                                                 | C2  | 3.0026361  | -1.8375113 | -0.8125506 |
|                                                                                     | 5 O                                                                                 | O2  | 4.1835848  | -1.7797571 | -1.0607021 |
|                                                                                     | 6 C                                                                                 | C3  | 2.2265006  | -3.1132609 | -0.6377335 |
|                                                                                     | 7 H                                                                                 | H1  | 1.6274981  | -3.0841943 | 0.2771836  |
|                                                                                     | 8 H                                                                                 | H5  | 2.9297200  | -3.9449555 | -0.6035935 |
|                                                                                     | 9 H                                                                                 | H6  | 1.5415089  | -3.2596061 | -1.4798940 |
|                                                                                     | 10 C                                                                                | C4  | 0.4519013  | 0.7227631  | -0.1041376 |
|                                                                                     | 11 H                                                                                | H2  | 0.6200914  | 1.4377879  | -0.9283651 |
|                                                                                     | 12 H                                                                                | H4  | 1.0285179  | 1.1064662  | 0.7489336  |
|                                                                                     | 13 C                                                                                | C5  | -1.0391038 | 0.6899972  | 0.2418995  |
|                                                                                     | 14 H                                                                                | H7  | -1.6049639 | 0.3083463  | -0.6189957 |
|                                                                                     | 15 H                                                                                | H9  | -1.2061434 | -0.0179588 | 1.0644134  |
|                                                                                     | 16 C                                                                                | C6  | -1.5813143 | 2.0641837  | 0.6349658  |
|                                                                                     | 17 H                                                                                | H8  | -1.4069639 | 2.7701476  | -0.1878392 |
|                                                                                     | 18 H                                                                                | H10 | -1.0123844 | 2.4430355  | 1.4941729  |
|                                                                                     | 19 C                                                                                | C7  | -3.0696880 | 2.0336656  | 0.9781875  |
|                                                                                     | 20 H                                                                                | H11 | -3.6620590 | 1.6889378  | 0.1225153  |
|                                                                                     | 21 H                                                                                | H12 | -3.4334069 | 3.0271034  | 1.2607824  |
|                                                                                     | 22 H                                                                                | H13 | -3.2647364 | 1.3528554  | 1.8150268  |
|                                                                                     |  | 1 C | C1         | 1.5029644  | -0.3313961 |
| 2 H                                                                                 |                                                                                     | H3  | 1.1290354  | -1.2312990 | 0.8898279  |
| 3 O                                                                                 |                                                                                     | O1  | 1.5981919  | -0.4721647 | -0.9807644 |
| 4 C                                                                                 |                                                                                     | C2  | 1.7899652  | -1.6781306 | -1.5952456 |
| 5 O                                                                                 |                                                                                     | O2  | 1.9109486  | -1.6601585 | -2.7931456 |
| 6 C                                                                                 |                                                                                     | C3  | 1.8075124  | -2.9251348 | -0.7548319 |
| 7 H                                                                                 |                                                                                     | H1  | 2.5645608  | -2.8680642 | 0.0327812  |
| 8 H                                                                                 |                                                                                     | H5  | 2.0278209  | -3.7676649 | -1.4092592 |
| 9 H                                                                                 |                                                                                     | H6  | 0.8320765  | -3.0830271 | -0.2830556 |
| 10 C                                                                                |                                                                                     | C4  | 0.6533558  | 0.8809550  | 0.7201411  |
| 11 H                                                                                |                                                                                     | H2  | 1.1037409  | 1.7655231  | 0.2565172  |
| 12 H                                                                                |                                                                                     | H4  | 0.6639812  | 1.0307856  | 1.8045196  |
| 13 C                                                                                |                                                                                     | C5  | -0.7861759 | 0.6953634  | 0.2301162  |
| 14 H                                                                                |                                                                                     | H7  | -0.7884148 | 0.5659236  | -0.8586379 |
| 15 H                                                                                |                                                                                     | H9  | -1.2042715 | -0.2251553 | 0.6605871  |
| 16 C                                                                                |                                                                                     | C6  | -1.6763731 | 1.8811501  | 0.6048577  |
| 17 H                                                                                |                                                                                     | H8  | -1.2449319 | 2.8012284  | 0.1895278  |
| 18 H                                                                                |                                                                                     | H10 | -1.6778444 | 2.0026802  | 1.6959031  |
| 19 C                                                                                |                                                                                     | C7  | -3.1096926 | 1.7139358  | 0.1033076  |
| 20 H                                                                                |                                                                                     | H11 | -3.1337821 | 1.6211983  | -0.9886180 |
| 21 H                                                                                |                                                                                     | H12 | -3.7305303 | 2.5716004  | 0.3825155  |
| 22 H                                                                                |                                                                                     | H13 | -3.5696518 | 0.8128443  | 0.5254488  |
| 23 Br                                                                               |                                                                                     | Br1 | 3.3375143  | -0.1009927 | 1.1638404  |
|  | 1 H                                                                                 | H1  | 1.6103575  | 2.0810467  | -3.2794658 |
|                                                                                     | 2 C                                                                                 | C1  | 1.3817234  | 2.4275922  | -2.2631190 |
|                                                                                     | 3 H                                                                                 | H2  | 2.3456136  | 2.5431432  | -1.7502132 |
|                                                                                     | 4 C                                                                                 | C2  | 0.6691010  | 3.7771793  | -2.3283314 |
|                                                                                     | 5 H                                                                                 | H4  | 1.2774749  | 4.5236030  | -2.8495075 |
|                                                                                     | 6 H                                                                                 | H5  | 0.4581883  | 4.1572282  | -1.3219430 |
|                                                                                     | 7 H                                                                                 | H6  | -0.2861222 | 3.6902362  | -2.8591509 |
|                                                                                     | 8 C                                                                                 | C3  | 0.5534534  | 1.3632125  | -1.5426979 |
|                                                                                     | 9 H                                                                                 | H7  | -0.4091887 | 1.2419431  | -2.0575100 |
|                                                                                     | 10 H                                                                                | H8  | 0.3224952  | 1.7129787  | -0.5278329 |
|                                                                                     | 11 C                                                                                | C4  | 1.2716251  | 0.0162696  | -1.4796217 |
|                                                                                     | 12 H                                                                                | H3  | 2.2286523  | 0.1195199  | -0.9533526 |
|                                                                                     | 13 H                                                                                | H9  | 1.4955627  | -0.3354078 | -2.4934384 |
|                                                                                     | 14 C                                                                                | C5  | 0.4531494  | -1.0834228 | -0.7992643 |
|                                                                                     | 15 H                                                                                | H11 | -0.5039167 | -1.1946757 | -1.3159908 |
|                                                                                     | 16 O                                                                                | O1  | 1.2305907  | -2.2871679 | -0.9363719 |
|                                                                                     | 17 C                                                                                | C6  | 0.6814822  | -3.5182101 | -0.8484972 |
|                                                                                     | 18 O                                                                                | O2  | 1.4234766  | -4.4675946 | -0.9499759 |
|                                                                                     | 19 C                                                                                | C7  | -0.8072288 | -3.6402976 | -0.6496630 |
|                                                                                     | 20 H                                                                                | H10 | -1.1341335 | -3.1063101 | 0.2472871  |
|                                                                                     | 21 H                                                                                | H13 | -1.0521706 | -4.6973937 | -0.5526406 |
|                                                                                     | 22 H                                                                                | H14 | -1.3477551 | -3.2232449 | -1.5054299 |
|                                                                                     | 23 C                                                                                | C8  | 0.2622391  | -0.8037225 | 0.6614980  |
|                                                                                     | 24 H                                                                                | H15 | 1.1515177  | -0.9460982 | 1.2743756  |
|                                                                                     | 25 C                                                                                | C9  | -0.8300574 | -0.3795412 | 1.3011973  |
|                                                                                     | 26 I                                                                                | I1  | -2.6687435 | -0.0307558 | 0.3330980  |
|                                                                                     | 27 C                                                                                | C10 | -0.7399606 | -0.1413780 | 2.7797923  |
|                                                                                     | 28 O                                                                                | O3  | 0.2845207  | -0.3144743 | 3.4063389  |
|                                                                                     | 29 O                                                                                | O4  | -1.8804440 | 0.2693508  | 3.3169617  |
|                                                                                     | 30 C                                                                                | C11 | -1.8546423 | 0.5142352  | 4.7300321  |
|                                                                                     | 31 H                                                                                | H12 | -1.5943986 | -0.4007047 | 5.2660277  |
|                                                                                     | 32 H                                                                                | H16 | -2.8626607 | 0.8357026  | 4.9854598  |
|                                                                                     | 33 H                                                                                | H17 | -1.1298011 | 1.2971585  | 4.9619496  |



|                                                                                     |                                                                                                                                                                                                                                                                                                                                                                                                                                                                                                                                                                                                                                                                                                                                                                                                                                                                                                                                                                                                                                                                                                                                                                                                                                                                                                                                                                                                                                                                                                                                                                                                                                                                                                                                                                                                                                                                                                                                                                                                                                                                                                                                                                                                                                                                                                                                                                                                                                                                                                                                                                                                                                                                                                                                                                                                                                                                                                                                                                                                                                                                                                                    |            |            |            |            |            |     |    |            |           |            |     |    |           |           |            |     |    |            |           |            |     |    |           |           |            |     |    |           |           |            |     |    |            |            |            |     |    |           |            |            |     |    |            |           |            |      |    |           |           |            |      |     |           |            |            |      |    |           |           |            |      |    |           |            |            |      |     |           |            |            |      |     |            |            |            |      |    |           |            |            |      |    |           |            |            |      |    |           |            |            |      |    |            |            |            |      |     |            |            |            |      |     |            |            |            |      |     |            |            |            |      |    |            |            |           |      |     |           |            |           |      |    |            |            |           |      |     |            |            |           |      |     |            |            |            |      |    |            |            |           |      |     |            |           |           |      |     |            |            |           |      |     |            |           |            |      |     |            |            |           |      |     |            |           |           |
|-------------------------------------------------------------------------------------|--------------------------------------------------------------------------------------------------------------------------------------------------------------------------------------------------------------------------------------------------------------------------------------------------------------------------------------------------------------------------------------------------------------------------------------------------------------------------------------------------------------------------------------------------------------------------------------------------------------------------------------------------------------------------------------------------------------------------------------------------------------------------------------------------------------------------------------------------------------------------------------------------------------------------------------------------------------------------------------------------------------------------------------------------------------------------------------------------------------------------------------------------------------------------------------------------------------------------------------------------------------------------------------------------------------------------------------------------------------------------------------------------------------------------------------------------------------------------------------------------------------------------------------------------------------------------------------------------------------------------------------------------------------------------------------------------------------------------------------------------------------------------------------------------------------------------------------------------------------------------------------------------------------------------------------------------------------------------------------------------------------------------------------------------------------------------------------------------------------------------------------------------------------------------------------------------------------------------------------------------------------------------------------------------------------------------------------------------------------------------------------------------------------------------------------------------------------------------------------------------------------------------------------------------------------------------------------------------------------------------------------------------------------------------------------------------------------------------------------------------------------------------------------------------------------------------------------------------------------------------------------------------------------------------------------------------------------------------------------------------------------------------------------------------------------------------------------------------------------------|------------|------------|------------|------------|------------|-----|----|------------|-----------|------------|-----|----|-----------|-----------|------------|-----|----|------------|-----------|------------|-----|----|-----------|-----------|------------|-----|----|-----------|-----------|------------|-----|----|------------|------------|------------|-----|----|-----------|------------|------------|-----|----|------------|-----------|------------|------|----|-----------|-----------|------------|------|-----|-----------|------------|------------|------|----|-----------|-----------|------------|------|----|-----------|------------|------------|------|-----|-----------|------------|------------|------|-----|------------|------------|------------|------|----|-----------|------------|------------|------|----|-----------|------------|------------|------|----|-----------|------------|------------|------|----|------------|------------|------------|------|-----|------------|------------|------------|------|-----|------------|------------|------------|------|-----|------------|------------|------------|------|----|------------|------------|-----------|------|-----|-----------|------------|-----------|------|----|------------|------------|-----------|------|-----|------------|------------|-----------|------|-----|------------|------------|------------|------|----|------------|------------|-----------|------|-----|------------|-----------|-----------|------|-----|------------|------------|-----------|------|-----|------------|-----------|------------|------|-----|------------|------------|-----------|------|-----|------------|-----------|-----------|
| 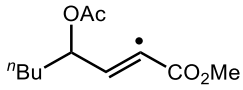   | <table border="1"> <tbody> <tr><td>1 H</td><td>H1</td><td>1.2011926</td><td>2.0758811</td><td>-3.3682301</td></tr> <tr><td>2 C</td><td>C1</td><td>1.2234577</td><td>2.4030248</td><td>-2.3204366</td></tr> <tr><td>3 H</td><td>H2</td><td>2.2823209</td><td>2.4621758</td><td>-2.0361796</td></tr> <tr><td>4 C</td><td>C2</td><td>0.5815022</td><td>3.7839583</td><td>-2.1987697</td></tr> <tr><td>5 H</td><td>H4</td><td>1.0939104</td><td>4.5181327</td><td>-2.8291605</td></tr> <tr><td>6 H</td><td>H5</td><td>0.6193414</td><td>4.1432362</td><td>-1.1637681</td></tr> <tr><td>7 H</td><td>H6</td><td>-0.4712090</td><td>3.7545600</td><td>-2.5034395</td></tr> <tr><td>8 C</td><td>C3</td><td>0.5283652</td><td>1.3555735</td><td>-1.4497091</td></tr> <tr><td>9 H</td><td>H7</td><td>-0.5283571</td><td>1.2818604</td><td>-1.7424707</td></tr> <tr><td>10 H</td><td>H8</td><td>0.5380908</td><td>1.6905958</td><td>-0.4045622</td></tr> <tr><td>11 C</td><td>C4</td><td>1.1842564</td><td>-0.0203153</td><td>-1.5593434</td></tr> <tr><td>12 H</td><td>H3</td><td>2.2261543</td><td>0.0262772</td><td>-1.2188035</td></tr> <tr><td>13 H</td><td>H9</td><td>1.1990792</td><td>-0.3453122</td><td>-2.6064510</td></tr> <tr><td>14 C</td><td>C5</td><td>0.4524802</td><td>-1.0984805</td><td>-0.7616964</td></tr> <tr><td>15 H</td><td>H11</td><td>-0.5856667</td><td>-1.1577093</td><td>-1.0993852</td></tr> <tr><td>16 O</td><td>O1</td><td>1.1396078</td><td>-2.3332599</td><td>-1.0396002</td></tr> <tr><td>17 C</td><td>C6</td><td>0.5465718</td><td>-3.5386506</td><td>-0.9089435</td></tr> <tr><td>18 O</td><td>O2</td><td>1.2265778</td><td>-4.5195267</td><td>-1.1060219</td></tr> <tr><td>19 C</td><td>C7</td><td>-0.9182475</td><td>-3.5983055</td><td>-0.5583617</td></tr> <tr><td>20 H</td><td>H10</td><td>-1.1360204</td><td>-3.0438241</td><td>0.3586261</td></tr> <tr><td>21 H</td><td>H13</td><td>-1.1937392</td><td>-4.6443834</td><td>-0.4280675</td></tr> <tr><td>22 H</td><td>H14</td><td>-1.5208167</td><td>-3.1670806</td><td>-1.3645509</td></tr> <tr><td>23 C</td><td>C8</td><td>0.5098995</td><td>-0.8331446</td><td>0.7210121</td></tr> <tr><td>24 H</td><td>H15</td><td>1.5017405</td><td>-0.9144394</td><td>1.1781213</td></tr> <tr><td>25 C</td><td>C9</td><td>-0.5261389</td><td>-0.4859438</td><td>1.4554877</td></tr> <tr><td>26 C</td><td>C10</td><td>-0.6679891</td><td>-0.1451041</td><td>2.8762613</td></tr> <tr><td>27 O</td><td>O3</td><td>0.2589015</td><td>-0.1562581</td><td>3.6604410</td></tr> <tr><td>28 O</td><td>O4</td><td>-1.9214113</td><td>0.1710802</td><td>3.1877305</td></tr> <tr><td>29 C</td><td>C11</td><td>-2.1572481</td><td>0.5189058</td><td>4.5601041</td></tr> <tr><td>30 H</td><td>H12</td><td>-1.9027916</td><td>-0.3200451</td><td>5.2112269</td></tr> <tr><td>31 H</td><td>H16</td><td>-3.2204428</td><td>0.7434962</td><td>4.6232020</td></tr> <tr><td>32 H</td><td>H17</td><td>-1.5633718</td><td>1.3930252</td><td>4.8357384</td></tr> </tbody> </table>                                                                                  | 1 H        | H1         | 1.2011926  | 2.0758811  | -3.3682301 | 2 C | C1 | 1.2234577  | 2.4030248 | -2.3204366 | 3 H | H2 | 2.2823209 | 2.4621758 | -2.0361796 | 4 C | C2 | 0.5815022  | 3.7839583 | -2.1987697 | 5 H | H4 | 1.0939104 | 4.5181327 | -2.8291605 | 6 H | H5 | 0.6193414 | 4.1432362 | -1.1637681 | 7 H | H6 | -0.4712090 | 3.7545600  | -2.5034395 | 8 C | C3 | 0.5283652 | 1.3555735  | -1.4497091 | 9 H | H7 | -0.5283571 | 1.2818604 | -1.7424707 | 10 H | H8 | 0.5380908 | 1.6905958 | -0.4045622 | 11 C | C4  | 1.1842564 | -0.0203153 | -1.5593434 | 12 H | H3 | 2.2261543 | 0.0262772 | -1.2188035 | 13 H | H9 | 1.1990792 | -0.3453122 | -2.6064510 | 14 C | C5  | 0.4524802 | -1.0984805 | -0.7616964 | 15 H | H11 | -0.5856667 | -1.1577093 | -1.0993852 | 16 O | O1 | 1.1396078 | -2.3332599 | -1.0396002 | 17 C | C6 | 0.5465718 | -3.5386506 | -0.9089435 | 18 O | O2 | 1.2265778 | -4.5195267 | -1.1060219 | 19 C | C7 | -0.9182475 | -3.5983055 | -0.5583617 | 20 H | H10 | -1.1360204 | -3.0438241 | 0.3586261  | 21 H | H13 | -1.1937392 | -4.6443834 | -0.4280675 | 22 H | H14 | -1.5208167 | -3.1670806 | -1.3645509 | 23 C | C8 | 0.5098995  | -0.8331446 | 0.7210121 | 24 H | H15 | 1.5017405 | -0.9144394 | 1.1781213 | 25 C | C9 | -0.5261389 | -0.4859438 | 1.4554877 | 26 C | C10 | -0.6679891 | -0.1451041 | 2.8762613 | 27 O | O3  | 0.2589015  | -0.1562581 | 3.6604410  | 28 O | O4 | -1.9214113 | 0.1710802  | 3.1877305 | 29 C | C11 | -2.1572481 | 0.5189058 | 4.5601041 | 30 H | H12 | -1.9027916 | -0.3200451 | 5.2112269 | 31 H | H16 | -3.2204428 | 0.7434962 | 4.6232020  | 32 H | H17 | -1.5633718 | 1.3930252  | 4.8357384 |      |     |            |           |           |
| 1 H                                                                                 | H1                                                                                                                                                                                                                                                                                                                                                                                                                                                                                                                                                                                                                                                                                                                                                                                                                                                                                                                                                                                                                                                                                                                                                                                                                                                                                                                                                                                                                                                                                                                                                                                                                                                                                                                                                                                                                                                                                                                                                                                                                                                                                                                                                                                                                                                                                                                                                                                                                                                                                                                                                                                                                                                                                                                                                                                                                                                                                                                                                                                                                                                                                                                 | 1.2011926  | 2.0758811  | -3.3682301 |            |            |     |    |            |           |            |     |    |           |           |            |     |    |            |           |            |     |    |           |           |            |     |    |           |           |            |     |    |            |            |            |     |    |           |            |            |     |    |            |           |            |      |    |           |           |            |      |     |           |            |            |      |    |           |           |            |      |    |           |            |            |      |     |           |            |            |      |     |            |            |            |      |    |           |            |            |      |    |           |            |            |      |    |           |            |            |      |    |            |            |            |      |     |            |            |            |      |     |            |            |            |      |     |            |            |            |      |    |            |            |           |      |     |           |            |           |      |    |            |            |           |      |     |            |            |           |      |     |            |            |            |      |    |            |            |           |      |     |            |           |           |      |     |            |            |           |      |     |            |           |            |      |     |            |            |           |      |     |            |           |           |
| 2 C                                                                                 | C1                                                                                                                                                                                                                                                                                                                                                                                                                                                                                                                                                                                                                                                                                                                                                                                                                                                                                                                                                                                                                                                                                                                                                                                                                                                                                                                                                                                                                                                                                                                                                                                                                                                                                                                                                                                                                                                                                                                                                                                                                                                                                                                                                                                                                                                                                                                                                                                                                                                                                                                                                                                                                                                                                                                                                                                                                                                                                                                                                                                                                                                                                                                 | 1.2234577  | 2.4030248  | -2.3204366 |            |            |     |    |            |           |            |     |    |           |           |            |     |    |            |           |            |     |    |           |           |            |     |    |           |           |            |     |    |            |            |            |     |    |           |            |            |     |    |            |           |            |      |    |           |           |            |      |     |           |            |            |      |    |           |           |            |      |    |           |            |            |      |     |           |            |            |      |     |            |            |            |      |    |           |            |            |      |    |           |            |            |      |    |           |            |            |      |    |            |            |            |      |     |            |            |            |      |     |            |            |            |      |     |            |            |            |      |    |            |            |           |      |     |           |            |           |      |    |            |            |           |      |     |            |            |           |      |     |            |            |            |      |    |            |            |           |      |     |            |           |           |      |     |            |            |           |      |     |            |           |            |      |     |            |            |           |      |     |            |           |           |
| 3 H                                                                                 | H2                                                                                                                                                                                                                                                                                                                                                                                                                                                                                                                                                                                                                                                                                                                                                                                                                                                                                                                                                                                                                                                                                                                                                                                                                                                                                                                                                                                                                                                                                                                                                                                                                                                                                                                                                                                                                                                                                                                                                                                                                                                                                                                                                                                                                                                                                                                                                                                                                                                                                                                                                                                                                                                                                                                                                                                                                                                                                                                                                                                                                                                                                                                 | 2.2823209  | 2.4621758  | -2.0361796 |            |            |     |    |            |           |            |     |    |           |           |            |     |    |            |           |            |     |    |           |           |            |     |    |           |           |            |     |    |            |            |            |     |    |           |            |            |     |    |            |           |            |      |    |           |           |            |      |     |           |            |            |      |    |           |           |            |      |    |           |            |            |      |     |           |            |            |      |     |            |            |            |      |    |           |            |            |      |    |           |            |            |      |    |           |            |            |      |    |            |            |            |      |     |            |            |            |      |     |            |            |            |      |     |            |            |            |      |    |            |            |           |      |     |           |            |           |      |    |            |            |           |      |     |            |            |           |      |     |            |            |            |      |    |            |            |           |      |     |            |           |           |      |     |            |            |           |      |     |            |           |            |      |     |            |            |           |      |     |            |           |           |
| 4 C                                                                                 | C2                                                                                                                                                                                                                                                                                                                                                                                                                                                                                                                                                                                                                                                                                                                                                                                                                                                                                                                                                                                                                                                                                                                                                                                                                                                                                                                                                                                                                                                                                                                                                                                                                                                                                                                                                                                                                                                                                                                                                                                                                                                                                                                                                                                                                                                                                                                                                                                                                                                                                                                                                                                                                                                                                                                                                                                                                                                                                                                                                                                                                                                                                                                 | 0.5815022  | 3.7839583  | -2.1987697 |            |            |     |    |            |           |            |     |    |           |           |            |     |    |            |           |            |     |    |           |           |            |     |    |           |           |            |     |    |            |            |            |     |    |           |            |            |     |    |            |           |            |      |    |           |           |            |      |     |           |            |            |      |    |           |           |            |      |    |           |            |            |      |     |           |            |            |      |     |            |            |            |      |    |           |            |            |      |    |           |            |            |      |    |           |            |            |      |    |            |            |            |      |     |            |            |            |      |     |            |            |            |      |     |            |            |            |      |    |            |            |           |      |     |           |            |           |      |    |            |            |           |      |     |            |            |           |      |     |            |            |            |      |    |            |            |           |      |     |            |           |           |      |     |            |            |           |      |     |            |           |            |      |     |            |            |           |      |     |            |           |           |
| 5 H                                                                                 | H4                                                                                                                                                                                                                                                                                                                                                                                                                                                                                                                                                                                                                                                                                                                                                                                                                                                                                                                                                                                                                                                                                                                                                                                                                                                                                                                                                                                                                                                                                                                                                                                                                                                                                                                                                                                                                                                                                                                                                                                                                                                                                                                                                                                                                                                                                                                                                                                                                                                                                                                                                                                                                                                                                                                                                                                                                                                                                                                                                                                                                                                                                                                 | 1.0939104  | 4.5181327  | -2.8291605 |            |            |     |    |            |           |            |     |    |           |           |            |     |    |            |           |            |     |    |           |           |            |     |    |           |           |            |     |    |            |            |            |     |    |           |            |            |     |    |            |           |            |      |    |           |           |            |      |     |           |            |            |      |    |           |           |            |      |    |           |            |            |      |     |           |            |            |      |     |            |            |            |      |    |           |            |            |      |    |           |            |            |      |    |           |            |            |      |    |            |            |            |      |     |            |            |            |      |     |            |            |            |      |     |            |            |            |      |    |            |            |           |      |     |           |            |           |      |    |            |            |           |      |     |            |            |           |      |     |            |            |            |      |    |            |            |           |      |     |            |           |           |      |     |            |            |           |      |     |            |           |            |      |     |            |            |           |      |     |            |           |           |
| 6 H                                                                                 | H5                                                                                                                                                                                                                                                                                                                                                                                                                                                                                                                                                                                                                                                                                                                                                                                                                                                                                                                                                                                                                                                                                                                                                                                                                                                                                                                                                                                                                                                                                                                                                                                                                                                                                                                                                                                                                                                                                                                                                                                                                                                                                                                                                                                                                                                                                                                                                                                                                                                                                                                                                                                                                                                                                                                                                                                                                                                                                                                                                                                                                                                                                                                 | 0.6193414  | 4.1432362  | -1.1637681 |            |            |     |    |            |           |            |     |    |           |           |            |     |    |            |           |            |     |    |           |           |            |     |    |           |           |            |     |    |            |            |            |     |    |           |            |            |     |    |            |           |            |      |    |           |           |            |      |     |           |            |            |      |    |           |           |            |      |    |           |            |            |      |     |           |            |            |      |     |            |            |            |      |    |           |            |            |      |    |           |            |            |      |    |           |            |            |      |    |            |            |            |      |     |            |            |            |      |     |            |            |            |      |     |            |            |            |      |    |            |            |           |      |     |           |            |           |      |    |            |            |           |      |     |            |            |           |      |     |            |            |            |      |    |            |            |           |      |     |            |           |           |      |     |            |            |           |      |     |            |           |            |      |     |            |            |           |      |     |            |           |           |
| 7 H                                                                                 | H6                                                                                                                                                                                                                                                                                                                                                                                                                                                                                                                                                                                                                                                                                                                                                                                                                                                                                                                                                                                                                                                                                                                                                                                                                                                                                                                                                                                                                                                                                                                                                                                                                                                                                                                                                                                                                                                                                                                                                                                                                                                                                                                                                                                                                                                                                                                                                                                                                                                                                                                                                                                                                                                                                                                                                                                                                                                                                                                                                                                                                                                                                                                 | -0.4712090 | 3.7545600  | -2.5034395 |            |            |     |    |            |           |            |     |    |           |           |            |     |    |            |           |            |     |    |           |           |            |     |    |           |           |            |     |    |            |            |            |     |    |           |            |            |     |    |            |           |            |      |    |           |           |            |      |     |           |            |            |      |    |           |           |            |      |    |           |            |            |      |     |           |            |            |      |     |            |            |            |      |    |           |            |            |      |    |           |            |            |      |    |           |            |            |      |    |            |            |            |      |     |            |            |            |      |     |            |            |            |      |     |            |            |            |      |    |            |            |           |      |     |           |            |           |      |    |            |            |           |      |     |            |            |           |      |     |            |            |            |      |    |            |            |           |      |     |            |           |           |      |     |            |            |           |      |     |            |           |            |      |     |            |            |           |      |     |            |           |           |
| 8 C                                                                                 | C3                                                                                                                                                                                                                                                                                                                                                                                                                                                                                                                                                                                                                                                                                                                                                                                                                                                                                                                                                                                                                                                                                                                                                                                                                                                                                                                                                                                                                                                                                                                                                                                                                                                                                                                                                                                                                                                                                                                                                                                                                                                                                                                                                                                                                                                                                                                                                                                                                                                                                                                                                                                                                                                                                                                                                                                                                                                                                                                                                                                                                                                                                                                 | 0.5283652  | 1.3555735  | -1.4497091 |            |            |     |    |            |           |            |     |    |           |           |            |     |    |            |           |            |     |    |           |           |            |     |    |           |           |            |     |    |            |            |            |     |    |           |            |            |     |    |            |           |            |      |    |           |           |            |      |     |           |            |            |      |    |           |           |            |      |    |           |            |            |      |     |           |            |            |      |     |            |            |            |      |    |           |            |            |      |    |           |            |            |      |    |           |            |            |      |    |            |            |            |      |     |            |            |            |      |     |            |            |            |      |     |            |            |            |      |    |            |            |           |      |     |           |            |           |      |    |            |            |           |      |     |            |            |           |      |     |            |            |            |      |    |            |            |           |      |     |            |           |           |      |     |            |            |           |      |     |            |           |            |      |     |            |            |           |      |     |            |           |           |
| 9 H                                                                                 | H7                                                                                                                                                                                                                                                                                                                                                                                                                                                                                                                                                                                                                                                                                                                                                                                                                                                                                                                                                                                                                                                                                                                                                                                                                                                                                                                                                                                                                                                                                                                                                                                                                                                                                                                                                                                                                                                                                                                                                                                                                                                                                                                                                                                                                                                                                                                                                                                                                                                                                                                                                                                                                                                                                                                                                                                                                                                                                                                                                                                                                                                                                                                 | -0.5283571 | 1.2818604  | -1.7424707 |            |            |     |    |            |           |            |     |    |           |           |            |     |    |            |           |            |     |    |           |           |            |     |    |           |           |            |     |    |            |            |            |     |    |           |            |            |     |    |            |           |            |      |    |           |           |            |      |     |           |            |            |      |    |           |           |            |      |    |           |            |            |      |     |           |            |            |      |     |            |            |            |      |    |           |            |            |      |    |           |            |            |      |    |           |            |            |      |    |            |            |            |      |     |            |            |            |      |     |            |            |            |      |     |            |            |            |      |    |            |            |           |      |     |           |            |           |      |    |            |            |           |      |     |            |            |           |      |     |            |            |            |      |    |            |            |           |      |     |            |           |           |      |     |            |            |           |      |     |            |           |            |      |     |            |            |           |      |     |            |           |           |
| 10 H                                                                                | H8                                                                                                                                                                                                                                                                                                                                                                                                                                                                                                                                                                                                                                                                                                                                                                                                                                                                                                                                                                                                                                                                                                                                                                                                                                                                                                                                                                                                                                                                                                                                                                                                                                                                                                                                                                                                                                                                                                                                                                                                                                                                                                                                                                                                                                                                                                                                                                                                                                                                                                                                                                                                                                                                                                                                                                                                                                                                                                                                                                                                                                                                                                                 | 0.5380908  | 1.6905958  | -0.4045622 |            |            |     |    |            |           |            |     |    |           |           |            |     |    |            |           |            |     |    |           |           |            |     |    |           |           |            |     |    |            |            |            |     |    |           |            |            |     |    |            |           |            |      |    |           |           |            |      |     |           |            |            |      |    |           |           |            |      |    |           |            |            |      |     |           |            |            |      |     |            |            |            |      |    |           |            |            |      |    |           |            |            |      |    |           |            |            |      |    |            |            |            |      |     |            |            |            |      |     |            |            |            |      |     |            |            |            |      |    |            |            |           |      |     |           |            |           |      |    |            |            |           |      |     |            |            |           |      |     |            |            |            |      |    |            |            |           |      |     |            |           |           |      |     |            |            |           |      |     |            |           |            |      |     |            |            |           |      |     |            |           |           |
| 11 C                                                                                | C4                                                                                                                                                                                                                                                                                                                                                                                                                                                                                                                                                                                                                                                                                                                                                                                                                                                                                                                                                                                                                                                                                                                                                                                                                                                                                                                                                                                                                                                                                                                                                                                                                                                                                                                                                                                                                                                                                                                                                                                                                                                                                                                                                                                                                                                                                                                                                                                                                                                                                                                                                                                                                                                                                                                                                                                                                                                                                                                                                                                                                                                                                                                 | 1.1842564  | -0.0203153 | -1.5593434 |            |            |     |    |            |           |            |     |    |           |           |            |     |    |            |           |            |     |    |           |           |            |     |    |           |           |            |     |    |            |            |            |     |    |           |            |            |     |    |            |           |            |      |    |           |           |            |      |     |           |            |            |      |    |           |           |            |      |    |           |            |            |      |     |           |            |            |      |     |            |            |            |      |    |           |            |            |      |    |           |            |            |      |    |           |            |            |      |    |            |            |            |      |     |            |            |            |      |     |            |            |            |      |     |            |            |            |      |    |            |            |           |      |     |           |            |           |      |    |            |            |           |      |     |            |            |           |      |     |            |            |            |      |    |            |            |           |      |     |            |           |           |      |     |            |            |           |      |     |            |           |            |      |     |            |            |           |      |     |            |           |           |
| 12 H                                                                                | H3                                                                                                                                                                                                                                                                                                                                                                                                                                                                                                                                                                                                                                                                                                                                                                                                                                                                                                                                                                                                                                                                                                                                                                                                                                                                                                                                                                                                                                                                                                                                                                                                                                                                                                                                                                                                                                                                                                                                                                                                                                                                                                                                                                                                                                                                                                                                                                                                                                                                                                                                                                                                                                                                                                                                                                                                                                                                                                                                                                                                                                                                                                                 | 2.2261543  | 0.0262772  | -1.2188035 |            |            |     |    |            |           |            |     |    |           |           |            |     |    |            |           |            |     |    |           |           |            |     |    |           |           |            |     |    |            |            |            |     |    |           |            |            |     |    |            |           |            |      |    |           |           |            |      |     |           |            |            |      |    |           |           |            |      |    |           |            |            |      |     |           |            |            |      |     |            |            |            |      |    |           |            |            |      |    |           |            |            |      |    |           |            |            |      |    |            |            |            |      |     |            |            |            |      |     |            |            |            |      |     |            |            |            |      |    |            |            |           |      |     |           |            |           |      |    |            |            |           |      |     |            |            |           |      |     |            |            |            |      |    |            |            |           |      |     |            |           |           |      |     |            |            |           |      |     |            |           |            |      |     |            |            |           |      |     |            |           |           |
| 13 H                                                                                | H9                                                                                                                                                                                                                                                                                                                                                                                                                                                                                                                                                                                                                                                                                                                                                                                                                                                                                                                                                                                                                                                                                                                                                                                                                                                                                                                                                                                                                                                                                                                                                                                                                                                                                                                                                                                                                                                                                                                                                                                                                                                                                                                                                                                                                                                                                                                                                                                                                                                                                                                                                                                                                                                                                                                                                                                                                                                                                                                                                                                                                                                                                                                 | 1.1990792  | -0.3453122 | -2.6064510 |            |            |     |    |            |           |            |     |    |           |           |            |     |    |            |           |            |     |    |           |           |            |     |    |           |           |            |     |    |            |            |            |     |    |           |            |            |     |    |            |           |            |      |    |           |           |            |      |     |           |            |            |      |    |           |           |            |      |    |           |            |            |      |     |           |            |            |      |     |            |            |            |      |    |           |            |            |      |    |           |            |            |      |    |           |            |            |      |    |            |            |            |      |     |            |            |            |      |     |            |            |            |      |     |            |            |            |      |    |            |            |           |      |     |           |            |           |      |    |            |            |           |      |     |            |            |           |      |     |            |            |            |      |    |            |            |           |      |     |            |           |           |      |     |            |            |           |      |     |            |           |            |      |     |            |            |           |      |     |            |           |           |
| 14 C                                                                                | C5                                                                                                                                                                                                                                                                                                                                                                                                                                                                                                                                                                                                                                                                                                                                                                                                                                                                                                                                                                                                                                                                                                                                                                                                                                                                                                                                                                                                                                                                                                                                                                                                                                                                                                                                                                                                                                                                                                                                                                                                                                                                                                                                                                                                                                                                                                                                                                                                                                                                                                                                                                                                                                                                                                                                                                                                                                                                                                                                                                                                                                                                                                                 | 0.4524802  | -1.0984805 | -0.7616964 |            |            |     |    |            |           |            |     |    |           |           |            |     |    |            |           |            |     |    |           |           |            |     |    |           |           |            |     |    |            |            |            |     |    |           |            |            |     |    |            |           |            |      |    |           |           |            |      |     |           |            |            |      |    |           |           |            |      |    |           |            |            |      |     |           |            |            |      |     |            |            |            |      |    |           |            |            |      |    |           |            |            |      |    |           |            |            |      |    |            |            |            |      |     |            |            |            |      |     |            |            |            |      |     |            |            |            |      |    |            |            |           |      |     |           |            |           |      |    |            |            |           |      |     |            |            |           |      |     |            |            |            |      |    |            |            |           |      |     |            |           |           |      |     |            |            |           |      |     |            |           |            |      |     |            |            |           |      |     |            |           |           |
| 15 H                                                                                | H11                                                                                                                                                                                                                                                                                                                                                                                                                                                                                                                                                                                                                                                                                                                                                                                                                                                                                                                                                                                                                                                                                                                                                                                                                                                                                                                                                                                                                                                                                                                                                                                                                                                                                                                                                                                                                                                                                                                                                                                                                                                                                                                                                                                                                                                                                                                                                                                                                                                                                                                                                                                                                                                                                                                                                                                                                                                                                                                                                                                                                                                                                                                | -0.5856667 | -1.1577093 | -1.0993852 |            |            |     |    |            |           |            |     |    |           |           |            |     |    |            |           |            |     |    |           |           |            |     |    |           |           |            |     |    |            |            |            |     |    |           |            |            |     |    |            |           |            |      |    |           |           |            |      |     |           |            |            |      |    |           |           |            |      |    |           |            |            |      |     |           |            |            |      |     |            |            |            |      |    |           |            |            |      |    |           |            |            |      |    |           |            |            |      |    |            |            |            |      |     |            |            |            |      |     |            |            |            |      |     |            |            |            |      |    |            |            |           |      |     |           |            |           |      |    |            |            |           |      |     |            |            |           |      |     |            |            |            |      |    |            |            |           |      |     |            |           |           |      |     |            |            |           |      |     |            |           |            |      |     |            |            |           |      |     |            |           |           |
| 16 O                                                                                | O1                                                                                                                                                                                                                                                                                                                                                                                                                                                                                                                                                                                                                                                                                                                                                                                                                                                                                                                                                                                                                                                                                                                                                                                                                                                                                                                                                                                                                                                                                                                                                                                                                                                                                                                                                                                                                                                                                                                                                                                                                                                                                                                                                                                                                                                                                                                                                                                                                                                                                                                                                                                                                                                                                                                                                                                                                                                                                                                                                                                                                                                                                                                 | 1.1396078  | -2.3332599 | -1.0396002 |            |            |     |    |            |           |            |     |    |           |           |            |     |    |            |           |            |     |    |           |           |            |     |    |           |           |            |     |    |            |            |            |     |    |           |            |            |     |    |            |           |            |      |    |           |           |            |      |     |           |            |            |      |    |           |           |            |      |    |           |            |            |      |     |           |            |            |      |     |            |            |            |      |    |           |            |            |      |    |           |            |            |      |    |           |            |            |      |    |            |            |            |      |     |            |            |            |      |     |            |            |            |      |     |            |            |            |      |    |            |            |           |      |     |           |            |           |      |    |            |            |           |      |     |            |            |           |      |     |            |            |            |      |    |            |            |           |      |     |            |           |           |      |     |            |            |           |      |     |            |           |            |      |     |            |            |           |      |     |            |           |           |
| 17 C                                                                                | C6                                                                                                                                                                                                                                                                                                                                                                                                                                                                                                                                                                                                                                                                                                                                                                                                                                                                                                                                                                                                                                                                                                                                                                                                                                                                                                                                                                                                                                                                                                                                                                                                                                                                                                                                                                                                                                                                                                                                                                                                                                                                                                                                                                                                                                                                                                                                                                                                                                                                                                                                                                                                                                                                                                                                                                                                                                                                                                                                                                                                                                                                                                                 | 0.5465718  | -3.5386506 | -0.9089435 |            |            |     |    |            |           |            |     |    |           |           |            |     |    |            |           |            |     |    |           |           |            |     |    |           |           |            |     |    |            |            |            |     |    |           |            |            |     |    |            |           |            |      |    |           |           |            |      |     |           |            |            |      |    |           |           |            |      |    |           |            |            |      |     |           |            |            |      |     |            |            |            |      |    |           |            |            |      |    |           |            |            |      |    |           |            |            |      |    |            |            |            |      |     |            |            |            |      |     |            |            |            |      |     |            |            |            |      |    |            |            |           |      |     |           |            |           |      |    |            |            |           |      |     |            |            |           |      |     |            |            |            |      |    |            |            |           |      |     |            |           |           |      |     |            |            |           |      |     |            |           |            |      |     |            |            |           |      |     |            |           |           |
| 18 O                                                                                | O2                                                                                                                                                                                                                                                                                                                                                                                                                                                                                                                                                                                                                                                                                                                                                                                                                                                                                                                                                                                                                                                                                                                                                                                                                                                                                                                                                                                                                                                                                                                                                                                                                                                                                                                                                                                                                                                                                                                                                                                                                                                                                                                                                                                                                                                                                                                                                                                                                                                                                                                                                                                                                                                                                                                                                                                                                                                                                                                                                                                                                                                                                                                 | 1.2265778  | -4.5195267 | -1.1060219 |            |            |     |    |            |           |            |     |    |           |           |            |     |    |            |           |            |     |    |           |           |            |     |    |           |           |            |     |    |            |            |            |     |    |           |            |            |     |    |            |           |            |      |    |           |           |            |      |     |           |            |            |      |    |           |           |            |      |    |           |            |            |      |     |           |            |            |      |     |            |            |            |      |    |           |            |            |      |    |           |            |            |      |    |           |            |            |      |    |            |            |            |      |     |            |            |            |      |     |            |            |            |      |     |            |            |            |      |    |            |            |           |      |     |           |            |           |      |    |            |            |           |      |     |            |            |           |      |     |            |            |            |      |    |            |            |           |      |     |            |           |           |      |     |            |            |           |      |     |            |           |            |      |     |            |            |           |      |     |            |           |           |
| 19 C                                                                                | C7                                                                                                                                                                                                                                                                                                                                                                                                                                                                                                                                                                                                                                                                                                                                                                                                                                                                                                                                                                                                                                                                                                                                                                                                                                                                                                                                                                                                                                                                                                                                                                                                                                                                                                                                                                                                                                                                                                                                                                                                                                                                                                                                                                                                                                                                                                                                                                                                                                                                                                                                                                                                                                                                                                                                                                                                                                                                                                                                                                                                                                                                                                                 | -0.9182475 | -3.5983055 | -0.5583617 |            |            |     |    |            |           |            |     |    |           |           |            |     |    |            |           |            |     |    |           |           |            |     |    |           |           |            |     |    |            |            |            |     |    |           |            |            |     |    |            |           |            |      |    |           |           |            |      |     |           |            |            |      |    |           |           |            |      |    |           |            |            |      |     |           |            |            |      |     |            |            |            |      |    |           |            |            |      |    |           |            |            |      |    |           |            |            |      |    |            |            |            |      |     |            |            |            |      |     |            |            |            |      |     |            |            |            |      |    |            |            |           |      |     |           |            |           |      |    |            |            |           |      |     |            |            |           |      |     |            |            |            |      |    |            |            |           |      |     |            |           |           |      |     |            |            |           |      |     |            |           |            |      |     |            |            |           |      |     |            |           |           |
| 20 H                                                                                | H10                                                                                                                                                                                                                                                                                                                                                                                                                                                                                                                                                                                                                                                                                                                                                                                                                                                                                                                                                                                                                                                                                                                                                                                                                                                                                                                                                                                                                                                                                                                                                                                                                                                                                                                                                                                                                                                                                                                                                                                                                                                                                                                                                                                                                                                                                                                                                                                                                                                                                                                                                                                                                                                                                                                                                                                                                                                                                                                                                                                                                                                                                                                | -1.1360204 | -3.0438241 | 0.3586261  |            |            |     |    |            |           |            |     |    |           |           |            |     |    |            |           |            |     |    |           |           |            |     |    |           |           |            |     |    |            |            |            |     |    |           |            |            |     |    |            |           |            |      |    |           |           |            |      |     |           |            |            |      |    |           |           |            |      |    |           |            |            |      |     |           |            |            |      |     |            |            |            |      |    |           |            |            |      |    |           |            |            |      |    |           |            |            |      |    |            |            |            |      |     |            |            |            |      |     |            |            |            |      |     |            |            |            |      |    |            |            |           |      |     |           |            |           |      |    |            |            |           |      |     |            |            |           |      |     |            |            |            |      |    |            |            |           |      |     |            |           |           |      |     |            |            |           |      |     |            |           |            |      |     |            |            |           |      |     |            |           |           |
| 21 H                                                                                | H13                                                                                                                                                                                                                                                                                                                                                                                                                                                                                                                                                                                                                                                                                                                                                                                                                                                                                                                                                                                                                                                                                                                                                                                                                                                                                                                                                                                                                                                                                                                                                                                                                                                                                                                                                                                                                                                                                                                                                                                                                                                                                                                                                                                                                                                                                                                                                                                                                                                                                                                                                                                                                                                                                                                                                                                                                                                                                                                                                                                                                                                                                                                | -1.1937392 | -4.6443834 | -0.4280675 |            |            |     |    |            |           |            |     |    |           |           |            |     |    |            |           |            |     |    |           |           |            |     |    |           |           |            |     |    |            |            |            |     |    |           |            |            |     |    |            |           |            |      |    |           |           |            |      |     |           |            |            |      |    |           |           |            |      |    |           |            |            |      |     |           |            |            |      |     |            |            |            |      |    |           |            |            |      |    |           |            |            |      |    |           |            |            |      |    |            |            |            |      |     |            |            |            |      |     |            |            |            |      |     |            |            |            |      |    |            |            |           |      |     |           |            |           |      |    |            |            |           |      |     |            |            |           |      |     |            |            |            |      |    |            |            |           |      |     |            |           |           |      |     |            |            |           |      |     |            |           |            |      |     |            |            |           |      |     |            |           |           |
| 22 H                                                                                | H14                                                                                                                                                                                                                                                                                                                                                                                                                                                                                                                                                                                                                                                                                                                                                                                                                                                                                                                                                                                                                                                                                                                                                                                                                                                                                                                                                                                                                                                                                                                                                                                                                                                                                                                                                                                                                                                                                                                                                                                                                                                                                                                                                                                                                                                                                                                                                                                                                                                                                                                                                                                                                                                                                                                                                                                                                                                                                                                                                                                                                                                                                                                | -1.5208167 | -3.1670806 | -1.3645509 |            |            |     |    |            |           |            |     |    |           |           |            |     |    |            |           |            |     |    |           |           |            |     |    |           |           |            |     |    |            |            |            |     |    |           |            |            |     |    |            |           |            |      |    |           |           |            |      |     |           |            |            |      |    |           |           |            |      |    |           |            |            |      |     |           |            |            |      |     |            |            |            |      |    |           |            |            |      |    |           |            |            |      |    |           |            |            |      |    |            |            |            |      |     |            |            |            |      |     |            |            |            |      |     |            |            |            |      |    |            |            |           |      |     |           |            |           |      |    |            |            |           |      |     |            |            |           |      |     |            |            |            |      |    |            |            |           |      |     |            |           |           |      |     |            |            |           |      |     |            |           |            |      |     |            |            |           |      |     |            |           |           |
| 23 C                                                                                | C8                                                                                                                                                                                                                                                                                                                                                                                                                                                                                                                                                                                                                                                                                                                                                                                                                                                                                                                                                                                                                                                                                                                                                                                                                                                                                                                                                                                                                                                                                                                                                                                                                                                                                                                                                                                                                                                                                                                                                                                                                                                                                                                                                                                                                                                                                                                                                                                                                                                                                                                                                                                                                                                                                                                                                                                                                                                                                                                                                                                                                                                                                                                 | 0.5098995  | -0.8331446 | 0.7210121  |            |            |     |    |            |           |            |     |    |           |           |            |     |    |            |           |            |     |    |           |           |            |     |    |           |           |            |     |    |            |            |            |     |    |           |            |            |     |    |            |           |            |      |    |           |           |            |      |     |           |            |            |      |    |           |           |            |      |    |           |            |            |      |     |           |            |            |      |     |            |            |            |      |    |           |            |            |      |    |           |            |            |      |    |           |            |            |      |    |            |            |            |      |     |            |            |            |      |     |            |            |            |      |     |            |            |            |      |    |            |            |           |      |     |           |            |           |      |    |            |            |           |      |     |            |            |           |      |     |            |            |            |      |    |            |            |           |      |     |            |           |           |      |     |            |            |           |      |     |            |           |            |      |     |            |            |           |      |     |            |           |           |
| 24 H                                                                                | H15                                                                                                                                                                                                                                                                                                                                                                                                                                                                                                                                                                                                                                                                                                                                                                                                                                                                                                                                                                                                                                                                                                                                                                                                                                                                                                                                                                                                                                                                                                                                                                                                                                                                                                                                                                                                                                                                                                                                                                                                                                                                                                                                                                                                                                                                                                                                                                                                                                                                                                                                                                                                                                                                                                                                                                                                                                                                                                                                                                                                                                                                                                                | 1.5017405  | -0.9144394 | 1.1781213  |            |            |     |    |            |           |            |     |    |           |           |            |     |    |            |           |            |     |    |           |           |            |     |    |           |           |            |     |    |            |            |            |     |    |           |            |            |     |    |            |           |            |      |    |           |           |            |      |     |           |            |            |      |    |           |           |            |      |    |           |            |            |      |     |           |            |            |      |     |            |            |            |      |    |           |            |            |      |    |           |            |            |      |    |           |            |            |      |    |            |            |            |      |     |            |            |            |      |     |            |            |            |      |     |            |            |            |      |    |            |            |           |      |     |           |            |           |      |    |            |            |           |      |     |            |            |           |      |     |            |            |            |      |    |            |            |           |      |     |            |           |           |      |     |            |            |           |      |     |            |           |            |      |     |            |            |           |      |     |            |           |           |
| 25 C                                                                                | C9                                                                                                                                                                                                                                                                                                                                                                                                                                                                                                                                                                                                                                                                                                                                                                                                                                                                                                                                                                                                                                                                                                                                                                                                                                                                                                                                                                                                                                                                                                                                                                                                                                                                                                                                                                                                                                                                                                                                                                                                                                                                                                                                                                                                                                                                                                                                                                                                                                                                                                                                                                                                                                                                                                                                                                                                                                                                                                                                                                                                                                                                                                                 | -0.5261389 | -0.4859438 | 1.4554877  |            |            |     |    |            |           |            |     |    |           |           |            |     |    |            |           |            |     |    |           |           |            |     |    |           |           |            |     |    |            |            |            |     |    |           |            |            |     |    |            |           |            |      |    |           |           |            |      |     |           |            |            |      |    |           |           |            |      |    |           |            |            |      |     |           |            |            |      |     |            |            |            |      |    |           |            |            |      |    |           |            |            |      |    |           |            |            |      |    |            |            |            |      |     |            |            |            |      |     |            |            |            |      |     |            |            |            |      |    |            |            |           |      |     |           |            |           |      |    |            |            |           |      |     |            |            |           |      |     |            |            |            |      |    |            |            |           |      |     |            |           |           |      |     |            |            |           |      |     |            |           |            |      |     |            |            |           |      |     |            |           |           |
| 26 C                                                                                | C10                                                                                                                                                                                                                                                                                                                                                                                                                                                                                                                                                                                                                                                                                                                                                                                                                                                                                                                                                                                                                                                                                                                                                                                                                                                                                                                                                                                                                                                                                                                                                                                                                                                                                                                                                                                                                                                                                                                                                                                                                                                                                                                                                                                                                                                                                                                                                                                                                                                                                                                                                                                                                                                                                                                                                                                                                                                                                                                                                                                                                                                                                                                | -0.6679891 | -0.1451041 | 2.8762613  |            |            |     |    |            |           |            |     |    |           |           |            |     |    |            |           |            |     |    |           |           |            |     |    |           |           |            |     |    |            |            |            |     |    |           |            |            |     |    |            |           |            |      |    |           |           |            |      |     |           |            |            |      |    |           |           |            |      |    |           |            |            |      |     |           |            |            |      |     |            |            |            |      |    |           |            |            |      |    |           |            |            |      |    |           |            |            |      |    |            |            |            |      |     |            |            |            |      |     |            |            |            |      |     |            |            |            |      |    |            |            |           |      |     |           |            |           |      |    |            |            |           |      |     |            |            |           |      |     |            |            |            |      |    |            |            |           |      |     |            |           |           |      |     |            |            |           |      |     |            |           |            |      |     |            |            |           |      |     |            |           |           |
| 27 O                                                                                | O3                                                                                                                                                                                                                                                                                                                                                                                                                                                                                                                                                                                                                                                                                                                                                                                                                                                                                                                                                                                                                                                                                                                                                                                                                                                                                                                                                                                                                                                                                                                                                                                                                                                                                                                                                                                                                                                                                                                                                                                                                                                                                                                                                                                                                                                                                                                                                                                                                                                                                                                                                                                                                                                                                                                                                                                                                                                                                                                                                                                                                                                                                                                 | 0.2589015  | -0.1562581 | 3.6604410  |            |            |     |    |            |           |            |     |    |           |           |            |     |    |            |           |            |     |    |           |           |            |     |    |           |           |            |     |    |            |            |            |     |    |           |            |            |     |    |            |           |            |      |    |           |           |            |      |     |           |            |            |      |    |           |           |            |      |    |           |            |            |      |     |           |            |            |      |     |            |            |            |      |    |           |            |            |      |    |           |            |            |      |    |           |            |            |      |    |            |            |            |      |     |            |            |            |      |     |            |            |            |      |     |            |            |            |      |    |            |            |           |      |     |           |            |           |      |    |            |            |           |      |     |            |            |           |      |     |            |            |            |      |    |            |            |           |      |     |            |           |           |      |     |            |            |           |      |     |            |           |            |      |     |            |            |           |      |     |            |           |           |
| 28 O                                                                                | O4                                                                                                                                                                                                                                                                                                                                                                                                                                                                                                                                                                                                                                                                                                                                                                                                                                                                                                                                                                                                                                                                                                                                                                                                                                                                                                                                                                                                                                                                                                                                                                                                                                                                                                                                                                                                                                                                                                                                                                                                                                                                                                                                                                                                                                                                                                                                                                                                                                                                                                                                                                                                                                                                                                                                                                                                                                                                                                                                                                                                                                                                                                                 | -1.9214113 | 0.1710802  | 3.1877305  |            |            |     |    |            |           |            |     |    |           |           |            |     |    |            |           |            |     |    |           |           |            |     |    |           |           |            |     |    |            |            |            |     |    |           |            |            |     |    |            |           |            |      |    |           |           |            |      |     |           |            |            |      |    |           |           |            |      |    |           |            |            |      |     |           |            |            |      |     |            |            |            |      |    |           |            |            |      |    |           |            |            |      |    |           |            |            |      |    |            |            |            |      |     |            |            |            |      |     |            |            |            |      |     |            |            |            |      |    |            |            |           |      |     |           |            |           |      |    |            |            |           |      |     |            |            |           |      |     |            |            |            |      |    |            |            |           |      |     |            |           |           |      |     |            |            |           |      |     |            |           |            |      |     |            |            |           |      |     |            |           |           |
| 29 C                                                                                | C11                                                                                                                                                                                                                                                                                                                                                                                                                                                                                                                                                                                                                                                                                                                                                                                                                                                                                                                                                                                                                                                                                                                                                                                                                                                                                                                                                                                                                                                                                                                                                                                                                                                                                                                                                                                                                                                                                                                                                                                                                                                                                                                                                                                                                                                                                                                                                                                                                                                                                                                                                                                                                                                                                                                                                                                                                                                                                                                                                                                                                                                                                                                | -2.1572481 | 0.5189058  | 4.5601041  |            |            |     |    |            |           |            |     |    |           |           |            |     |    |            |           |            |     |    |           |           |            |     |    |           |           |            |     |    |            |            |            |     |    |           |            |            |     |    |            |           |            |      |    |           |           |            |      |     |           |            |            |      |    |           |           |            |      |    |           |            |            |      |     |           |            |            |      |     |            |            |            |      |    |           |            |            |      |    |           |            |            |      |    |           |            |            |      |    |            |            |            |      |     |            |            |            |      |     |            |            |            |      |     |            |            |            |      |    |            |            |           |      |     |           |            |           |      |    |            |            |           |      |     |            |            |           |      |     |            |            |            |      |    |            |            |           |      |     |            |           |           |      |     |            |            |           |      |     |            |           |            |      |     |            |            |           |      |     |            |           |           |
| 30 H                                                                                | H12                                                                                                                                                                                                                                                                                                                                                                                                                                                                                                                                                                                                                                                                                                                                                                                                                                                                                                                                                                                                                                                                                                                                                                                                                                                                                                                                                                                                                                                                                                                                                                                                                                                                                                                                                                                                                                                                                                                                                                                                                                                                                                                                                                                                                                                                                                                                                                                                                                                                                                                                                                                                                                                                                                                                                                                                                                                                                                                                                                                                                                                                                                                | -1.9027916 | -0.3200451 | 5.2112269  |            |            |     |    |            |           |            |     |    |           |           |            |     |    |            |           |            |     |    |           |           |            |     |    |           |           |            |     |    |            |            |            |     |    |           |            |            |     |    |            |           |            |      |    |           |           |            |      |     |           |            |            |      |    |           |           |            |      |    |           |            |            |      |     |           |            |            |      |     |            |            |            |      |    |           |            |            |      |    |           |            |            |      |    |           |            |            |      |    |            |            |            |      |     |            |            |            |      |     |            |            |            |      |     |            |            |            |      |    |            |            |           |      |     |           |            |           |      |    |            |            |           |      |     |            |            |           |      |     |            |            |            |      |    |            |            |           |      |     |            |           |           |      |     |            |            |           |      |     |            |           |            |      |     |            |            |           |      |     |            |           |           |
| 31 H                                                                                | H16                                                                                                                                                                                                                                                                                                                                                                                                                                                                                                                                                                                                                                                                                                                                                                                                                                                                                                                                                                                                                                                                                                                                                                                                                                                                                                                                                                                                                                                                                                                                                                                                                                                                                                                                                                                                                                                                                                                                                                                                                                                                                                                                                                                                                                                                                                                                                                                                                                                                                                                                                                                                                                                                                                                                                                                                                                                                                                                                                                                                                                                                                                                | -3.2204428 | 0.7434962  | 4.6232020  |            |            |     |    |            |           |            |     |    |           |           |            |     |    |            |           |            |     |    |           |           |            |     |    |           |           |            |     |    |            |            |            |     |    |           |            |            |     |    |            |           |            |      |    |           |           |            |      |     |           |            |            |      |    |           |           |            |      |    |           |            |            |      |     |           |            |            |      |     |            |            |            |      |    |           |            |            |      |    |           |            |            |      |    |           |            |            |      |    |            |            |            |      |     |            |            |            |      |     |            |            |            |      |     |            |            |            |      |    |            |            |           |      |     |           |            |           |      |    |            |            |           |      |     |            |            |           |      |     |            |            |            |      |    |            |            |           |      |     |            |           |           |      |     |            |            |           |      |     |            |           |            |      |     |            |            |           |      |     |            |           |           |
| 32 H                                                                                | H17                                                                                                                                                                                                                                                                                                                                                                                                                                                                                                                                                                                                                                                                                                                                                                                                                                                                                                                                                                                                                                                                                                                                                                                                                                                                                                                                                                                                                                                                                                                                                                                                                                                                                                                                                                                                                                                                                                                                                                                                                                                                                                                                                                                                                                                                                                                                                                                                                                                                                                                                                                                                                                                                                                                                                                                                                                                                                                                                                                                                                                                                                                                | -1.5633718 | 1.3930252  | 4.8357384  |            |            |     |    |            |           |            |     |    |           |           |            |     |    |            |           |            |     |    |           |           |            |     |    |           |           |            |     |    |            |            |            |     |    |           |            |            |     |    |            |           |            |      |    |           |           |            |      |     |           |            |            |      |    |           |           |            |      |    |           |            |            |      |     |           |            |            |      |     |            |            |            |      |    |           |            |            |      |    |           |            |            |      |    |           |            |            |      |    |            |            |            |      |     |            |            |            |      |     |            |            |            |      |     |            |            |            |      |    |            |            |           |      |     |           |            |           |      |    |            |            |           |      |     |            |            |           |      |     |            |            |            |      |    |            |            |           |      |     |            |           |           |      |     |            |            |           |      |     |            |           |            |      |     |            |            |           |      |     |            |           |           |
|   | <table border="1"> <tbody> <tr><td>1 C</td><td>C1</td><td>-0.1075981</td><td>-0.2415801</td><td>-0.7434049</td></tr> <tr><td>2 H</td><td>H3</td><td>-1.0630557</td><td>0.1136256</td><td>-1.1270605</td></tr> <tr><td>3 C</td><td>C2</td><td>0.6030822</td><td>0.9210031</td><td>-0.0464761</td></tr> <tr><td>4 H</td><td>H5</td><td>-0.0821208</td><td>1.3048097</td><td>0.7168253</td></tr> <tr><td>5 H</td><td>H6</td><td>0.7353509</td><td>1.7132466</td><td>-0.7934097</td></tr> <tr><td>6 C</td><td>C3</td><td>1.9496375</td><td>0.5693672</td><td>0.5863307</td></tr> <tr><td>7 H</td><td>H4</td><td>1.8082614</td><td>-0.1969520</td><td>1.3608824</td></tr> <tr><td>8 H</td><td>H8</td><td>2.6121070</td><td>0.1339662</td><td>-0.1719277</td></tr> <tr><td>9 C</td><td>C4</td><td>2.6245030</td><td>1.7900076</td><td>1.2127664</td></tr> <tr><td>10 H</td><td>H9</td><td>1.9522674</td><td>2.2279989</td><td>1.9626303</td></tr> <tr><td>11 H</td><td>H10</td><td>2.7702498</td><td>2.5576368</td><td>0.4410408</td></tr> <tr><td>12 C</td><td>C5</td><td>3.9661453</td><td>1.4531058</td><td>1.8608102</td></tr> <tr><td>13 H</td><td>H7</td><td>3.8410080</td><td>0.7081945</td><td>2.6554228</td></tr> <tr><td>14 H</td><td>H11</td><td>4.4292284</td><td>2.3417959</td><td>2.3022164</td></tr> <tr><td>15 H</td><td>H12</td><td>4.6642498</td><td>1.0401146</td><td>1.1233239</td></tr> <tr><td>16 O</td><td>O1</td><td>0.7348245</td><td>-0.6455925</td><td>-1.8386510</td></tr> <tr><td>17 C</td><td>C6</td><td>0.2542187</td><td>-1.3329414</td><td>-2.8964163</td></tr> <tr><td>18 O</td><td>O2</td><td>1.0392089</td><td>-1.6533544</td><td>-3.7588516</td></tr> <tr><td>19 C</td><td>C7</td><td>-1.2201195</td><td>-1.6439009</td><td>-2.9539283</td></tr> <tr><td>20 H</td><td>H1</td><td>-1.5533545</td><td>-2.1830926</td><td>-2.0624910</td></tr> <tr><td>21 H</td><td>H13</td><td>-1.4048206</td><td>-2.2531964</td><td>-3.8379749</td></tr> <tr><td>22 H</td><td>H14</td><td>-1.8049300</td><td>-0.7210941</td><td>-3.0264015</td></tr> <tr><td>23 C</td><td>C8</td><td>-0.2855593</td><td>-1.4288356</td><td>0.1726218</td></tr> <tr><td>24 H</td><td>H15</td><td>0.5750142</td><td>-2.0934612</td><td>0.1865152</td></tr> <tr><td>25 C</td><td>C9</td><td>-1.3394890</td><td>-1.7348943</td><td>0.9356581</td></tr> <tr><td>26 I</td><td>I1</td><td>-1.2965257</td><td>-3.4955033</td><td>2.0989127</td></tr> <tr><td>27 C</td><td>C10</td><td>-2.6319246</td><td>-0.9852886</td><td>1.0247695</td></tr> <tr><td>28 O</td><td>O3</td><td>-3.6765061</td><td>-1.4665875</td><td>1.3997712</td></tr> <tr><td>29 O</td><td>O4</td><td>-2.4929034</td><td>0.2846837</td><td>0.6430080</td></tr> <tr><td>30 C</td><td>C11</td><td>-3.6900115</td><td>1.0771354</td><td>0.6460746</td></tr> <tr><td>31 H</td><td>H2</td><td>-4.4248509</td><td>0.6520822</td><td>-0.0403435</td></tr> <tr><td>32 H</td><td>H16</td><td>-3.3795328</td><td>2.0659078</td><td>0.3135146</td></tr> <tr><td>33 H</td><td>H17</td><td>-4.1060543</td><td>1.1215933</td><td>1.6542424</td></tr> </tbody> </table> | 1 C        | C1         | -0.1075981 | -0.2415801 | -0.7434049 | 2 H | H3 | -1.0630557 | 0.1136256 | -1.1270605 | 3 C | C2 | 0.6030822 | 0.9210031 | -0.0464761 | 4 H | H5 | -0.0821208 | 1.3048097 | 0.7168253  | 5 H | H6 | 0.7353509 | 1.7132466 | -0.7934097 | 6 C | C3 | 1.9496375 | 0.5693672 | 0.5863307  | 7 H | H4 | 1.8082614  | -0.1969520 | 1.3608824  | 8 H | H8 | 2.6121070 | 0.1339662  | -0.1719277 | 9 C | C4 | 2.6245030  | 1.7900076 | 1.2127664  | 10 H | H9 | 1.9522674 | 2.2279989 | 1.9626303  | 11 H | H10 | 2.7702498 | 2.5576368  | 0.4410408  | 12 C | C5 | 3.9661453 | 1.4531058 | 1.8608102  | 13 H | H7 | 3.8410080 | 0.7081945  | 2.6554228  | 14 H | H11 | 4.4292284 | 2.3417959  | 2.3022164  | 15 H | H12 | 4.6642498  | 1.0401146  | 1.1233239  | 16 O | O1 | 0.7348245 | -0.6455925 | -1.8386510 | 17 C | C6 | 0.2542187 | -1.3329414 | -2.8964163 | 18 O | O2 | 1.0392089 | -1.6533544 | -3.7588516 | 19 C | C7 | -1.2201195 | -1.6439009 | -2.9539283 | 20 H | H1  | -1.5533545 | -2.1830926 | -2.0624910 | 21 H | H13 | -1.4048206 | -2.2531964 | -3.8379749 | 22 H | H14 | -1.8049300 | -0.7210941 | -3.0264015 | 23 C | C8 | -0.2855593 | -1.4288356 | 0.1726218 | 24 H | H15 | 0.5750142 | -2.0934612 | 0.1865152 | 25 C | C9 | -1.3394890 | -1.7348943 | 0.9356581 | 26 I | I1  | -1.2965257 | -3.4955033 | 2.0989127 | 27 C | C10 | -2.6319246 | -0.9852886 | 1.0247695  | 28 O | O3 | -3.6765061 | -1.4665875 | 1.3997712 | 29 O | O4  | -2.4929034 | 0.2846837 | 0.6430080 | 30 C | C11 | -3.6900115 | 1.0771354  | 0.6460746 | 31 H | H2  | -4.4248509 | 0.6520822 | -0.0403435 | 32 H | H16 | -3.3795328 | 2.0659078  | 0.3135146 | 33 H | H17 | -4.1060543 | 1.1215933 | 1.6542424 |
| 1 C                                                                                 | C1                                                                                                                                                                                                                                                                                                                                                                                                                                                                                                                                                                                                                                                                                                                                                                                                                                                                                                                                                                                                                                                                                                                                                                                                                                                                                                                                                                                                                                                                                                                                                                                                                                                                                                                                                                                                                                                                                                                                                                                                                                                                                                                                                                                                                                                                                                                                                                                                                                                                                                                                                                                                                                                                                                                                                                                                                                                                                                                                                                                                                                                                                                                 | -0.1075981 | -0.2415801 | -0.7434049 |            |            |     |    |            |           |            |     |    |           |           |            |     |    |            |           |            |     |    |           |           |            |     |    |           |           |            |     |    |            |            |            |     |    |           |            |            |     |    |            |           |            |      |    |           |           |            |      |     |           |            |            |      |    |           |           |            |      |    |           |            |            |      |     |           |            |            |      |     |            |            |            |      |    |           |            |            |      |    |           |            |            |      |    |           |            |            |      |    |            |            |            |      |     |            |            |            |      |     |            |            |            |      |     |            |            |            |      |    |            |            |           |      |     |           |            |           |      |    |            |            |           |      |     |            |            |           |      |     |            |            |            |      |    |            |            |           |      |     |            |           |           |      |     |            |            |           |      |     |            |           |            |      |     |            |            |           |      |     |            |           |           |
| 2 H                                                                                 | H3                                                                                                                                                                                                                                                                                                                                                                                                                                                                                                                                                                                                                                                                                                                                                                                                                                                                                                                                                                                                                                                                                                                                                                                                                                                                                                                                                                                                                                                                                                                                                                                                                                                                                                                                                                                                                                                                                                                                                                                                                                                                                                                                                                                                                                                                                                                                                                                                                                                                                                                                                                                                                                                                                                                                                                                                                                                                                                                                                                                                                                                                                                                 | -1.0630557 | 0.1136256  | -1.1270605 |            |            |     |    |            |           |            |     |    |           |           |            |     |    |            |           |            |     |    |           |           |            |     |    |           |           |            |     |    |            |            |            |     |    |           |            |            |     |    |            |           |            |      |    |           |           |            |      |     |           |            |            |      |    |           |           |            |      |    |           |            |            |      |     |           |            |            |      |     |            |            |            |      |    |           |            |            |      |    |           |            |            |      |    |           |            |            |      |    |            |            |            |      |     |            |            |            |      |     |            |            |            |      |     |            |            |            |      |    |            |            |           |      |     |           |            |           |      |    |            |            |           |      |     |            |            |           |      |     |            |            |            |      |    |            |            |           |      |     |            |           |           |      |     |            |            |           |      |     |            |           |            |      |     |            |            |           |      |     |            |           |           |
| 3 C                                                                                 | C2                                                                                                                                                                                                                                                                                                                                                                                                                                                                                                                                                                                                                                                                                                                                                                                                                                                                                                                                                                                                                                                                                                                                                                                                                                                                                                                                                                                                                                                                                                                                                                                                                                                                                                                                                                                                                                                                                                                                                                                                                                                                                                                                                                                                                                                                                                                                                                                                                                                                                                                                                                                                                                                                                                                                                                                                                                                                                                                                                                                                                                                                                                                 | 0.6030822  | 0.9210031  | -0.0464761 |            |            |     |    |            |           |            |     |    |           |           |            |     |    |            |           |            |     |    |           |           |            |     |    |           |           |            |     |    |            |            |            |     |    |           |            |            |     |    |            |           |            |      |    |           |           |            |      |     |           |            |            |      |    |           |           |            |      |    |           |            |            |      |     |           |            |            |      |     |            |            |            |      |    |           |            |            |      |    |           |            |            |      |    |           |            |            |      |    |            |            |            |      |     |            |            |            |      |     |            |            |            |      |     |            |            |            |      |    |            |            |           |      |     |           |            |           |      |    |            |            |           |      |     |            |            |           |      |     |            |            |            |      |    |            |            |           |      |     |            |           |           |      |     |            |            |           |      |     |            |           |            |      |     |            |            |           |      |     |            |           |           |
| 4 H                                                                                 | H5                                                                                                                                                                                                                                                                                                                                                                                                                                                                                                                                                                                                                                                                                                                                                                                                                                                                                                                                                                                                                                                                                                                                                                                                                                                                                                                                                                                                                                                                                                                                                                                                                                                                                                                                                                                                                                                                                                                                                                                                                                                                                                                                                                                                                                                                                                                                                                                                                                                                                                                                                                                                                                                                                                                                                                                                                                                                                                                                                                                                                                                                                                                 | -0.0821208 | 1.3048097  | 0.7168253  |            |            |     |    |            |           |            |     |    |           |           |            |     |    |            |           |            |     |    |           |           |            |     |    |           |           |            |     |    |            |            |            |     |    |           |            |            |     |    |            |           |            |      |    |           |           |            |      |     |           |            |            |      |    |           |           |            |      |    |           |            |            |      |     |           |            |            |      |     |            |            |            |      |    |           |            |            |      |    |           |            |            |      |    |           |            |            |      |    |            |            |            |      |     |            |            |            |      |     |            |            |            |      |     |            |            |            |      |    |            |            |           |      |     |           |            |           |      |    |            |            |           |      |     |            |            |           |      |     |            |            |            |      |    |            |            |           |      |     |            |           |           |      |     |            |            |           |      |     |            |           |            |      |     |            |            |           |      |     |            |           |           |
| 5 H                                                                                 | H6                                                                                                                                                                                                                                                                                                                                                                                                                                                                                                                                                                                                                                                                                                                                                                                                                                                                                                                                                                                                                                                                                                                                                                                                                                                                                                                                                                                                                                                                                                                                                                                                                                                                                                                                                                                                                                                                                                                                                                                                                                                                                                                                                                                                                                                                                                                                                                                                                                                                                                                                                                                                                                                                                                                                                                                                                                                                                                                                                                                                                                                                                                                 | 0.7353509  | 1.7132466  | -0.7934097 |            |            |     |    |            |           |            |     |    |           |           |            |     |    |            |           |            |     |    |           |           |            |     |    |           |           |            |     |    |            |            |            |     |    |           |            |            |     |    |            |           |            |      |    |           |           |            |      |     |           |            |            |      |    |           |           |            |      |    |           |            |            |      |     |           |            |            |      |     |            |            |            |      |    |           |            |            |      |    |           |            |            |      |    |           |            |            |      |    |            |            |            |      |     |            |            |            |      |     |            |            |            |      |     |            |            |            |      |    |            |            |           |      |     |           |            |           |      |    |            |            |           |      |     |            |            |           |      |     |            |            |            |      |    |            |            |           |      |     |            |           |           |      |     |            |            |           |      |     |            |           |            |      |     |            |            |           |      |     |            |           |           |
| 6 C                                                                                 | C3                                                                                                                                                                                                                                                                                                                                                                                                                                                                                                                                                                                                                                                                                                                                                                                                                                                                                                                                                                                                                                                                                                                                                                                                                                                                                                                                                                                                                                                                                                                                                                                                                                                                                                                                                                                                                                                                                                                                                                                                                                                                                                                                                                                                                                                                                                                                                                                                                                                                                                                                                                                                                                                                                                                                                                                                                                                                                                                                                                                                                                                                                                                 | 1.9496375  | 0.5693672  | 0.5863307  |            |            |     |    |            |           |            |     |    |           |           |            |     |    |            |           |            |     |    |           |           |            |     |    |           |           |            |     |    |            |            |            |     |    |           |            |            |     |    |            |           |            |      |    |           |           |            |      |     |           |            |            |      |    |           |           |            |      |    |           |            |            |      |     |           |            |            |      |     |            |            |            |      |    |           |            |            |      |    |           |            |            |      |    |           |            |            |      |    |            |            |            |      |     |            |            |            |      |     |            |            |            |      |     |            |            |            |      |    |            |            |           |      |     |           |            |           |      |    |            |            |           |      |     |            |            |           |      |     |            |            |            |      |    |            |            |           |      |     |            |           |           |      |     |            |            |           |      |     |            |           |            |      |     |            |            |           |      |     |            |           |           |
| 7 H                                                                                 | H4                                                                                                                                                                                                                                                                                                                                                                                                                                                                                                                                                                                                                                                                                                                                                                                                                                                                                                                                                                                                                                                                                                                                                                                                                                                                                                                                                                                                                                                                                                                                                                                                                                                                                                                                                                                                                                                                                                                                                                                                                                                                                                                                                                                                                                                                                                                                                                                                                                                                                                                                                                                                                                                                                                                                                                                                                                                                                                                                                                                                                                                                                                                 | 1.8082614  | -0.1969520 | 1.3608824  |            |            |     |    |            |           |            |     |    |           |           |            |     |    |            |           |            |     |    |           |           |            |     |    |           |           |            |     |    |            |            |            |     |    |           |            |            |     |    |            |           |            |      |    |           |           |            |      |     |           |            |            |      |    |           |           |            |      |    |           |            |            |      |     |           |            |            |      |     |            |            |            |      |    |           |            |            |      |    |           |            |            |      |    |           |            |            |      |    |            |            |            |      |     |            |            |            |      |     |            |            |            |      |     |            |            |            |      |    |            |            |           |      |     |           |            |           |      |    |            |            |           |      |     |            |            |           |      |     |            |            |            |      |    |            |            |           |      |     |            |           |           |      |     |            |            |           |      |     |            |           |            |      |     |            |            |           |      |     |            |           |           |
| 8 H                                                                                 | H8                                                                                                                                                                                                                                                                                                                                                                                                                                                                                                                                                                                                                                                                                                                                                                                                                                                                                                                                                                                                                                                                                                                                                                                                                                                                                                                                                                                                                                                                                                                                                                                                                                                                                                                                                                                                                                                                                                                                                                                                                                                                                                                                                                                                                                                                                                                                                                                                                                                                                                                                                                                                                                                                                                                                                                                                                                                                                                                                                                                                                                                                                                                 | 2.6121070  | 0.1339662  | -0.1719277 |            |            |     |    |            |           |            |     |    |           |           |            |     |    |            |           |            |     |    |           |           |            |     |    |           |           |            |     |    |            |            |            |     |    |           |            |            |     |    |            |           |            |      |    |           |           |            |      |     |           |            |            |      |    |           |           |            |      |    |           |            |            |      |     |           |            |            |      |     |            |            |            |      |    |           |            |            |      |    |           |            |            |      |    |           |            |            |      |    |            |            |            |      |     |            |            |            |      |     |            |            |            |      |     |            |            |            |      |    |            |            |           |      |     |           |            |           |      |    |            |            |           |      |     |            |            |           |      |     |            |            |            |      |    |            |            |           |      |     |            |           |           |      |     |            |            |           |      |     |            |           |            |      |     |            |            |           |      |     |            |           |           |
| 9 C                                                                                 | C4                                                                                                                                                                                                                                                                                                                                                                                                                                                                                                                                                                                                                                                                                                                                                                                                                                                                                                                                                                                                                                                                                                                                                                                                                                                                                                                                                                                                                                                                                                                                                                                                                                                                                                                                                                                                                                                                                                                                                                                                                                                                                                                                                                                                                                                                                                                                                                                                                                                                                                                                                                                                                                                                                                                                                                                                                                                                                                                                                                                                                                                                                                                 | 2.6245030  | 1.7900076  | 1.2127664  |            |            |     |    |            |           |            |     |    |           |           |            |     |    |            |           |            |     |    |           |           |            |     |    |           |           |            |     |    |            |            |            |     |    |           |            |            |     |    |            |           |            |      |    |           |           |            |      |     |           |            |            |      |    |           |           |            |      |    |           |            |            |      |     |           |            |            |      |     |            |            |            |      |    |           |            |            |      |    |           |            |            |      |    |           |            |            |      |    |            |            |            |      |     |            |            |            |      |     |            |            |            |      |     |            |            |            |      |    |            |            |           |      |     |           |            |           |      |    |            |            |           |      |     |            |            |           |      |     |            |            |            |      |    |            |            |           |      |     |            |           |           |      |     |            |            |           |      |     |            |           |            |      |     |            |            |           |      |     |            |           |           |
| 10 H                                                                                | H9                                                                                                                                                                                                                                                                                                                                                                                                                                                                                                                                                                                                                                                                                                                                                                                                                                                                                                                                                                                                                                                                                                                                                                                                                                                                                                                                                                                                                                                                                                                                                                                                                                                                                                                                                                                                                                                                                                                                                                                                                                                                                                                                                                                                                                                                                                                                                                                                                                                                                                                                                                                                                                                                                                                                                                                                                                                                                                                                                                                                                                                                                                                 | 1.9522674  | 2.2279989  | 1.9626303  |            |            |     |    |            |           |            |     |    |           |           |            |     |    |            |           |            |     |    |           |           |            |     |    |           |           |            |     |    |            |            |            |     |    |           |            |            |     |    |            |           |            |      |    |           |           |            |      |     |           |            |            |      |    |           |           |            |      |    |           |            |            |      |     |           |            |            |      |     |            |            |            |      |    |           |            |            |      |    |           |            |            |      |    |           |            |            |      |    |            |            |            |      |     |            |            |            |      |     |            |            |            |      |     |            |            |            |      |    |            |            |           |      |     |           |            |           |      |    |            |            |           |      |     |            |            |           |      |     |            |            |            |      |    |            |            |           |      |     |            |           |           |      |     |            |            |           |      |     |            |           |            |      |     |            |            |           |      |     |            |           |           |
| 11 H                                                                                | H10                                                                                                                                                                                                                                                                                                                                                                                                                                                                                                                                                                                                                                                                                                                                                                                                                                                                                                                                                                                                                                                                                                                                                                                                                                                                                                                                                                                                                                                                                                                                                                                                                                                                                                                                                                                                                                                                                                                                                                                                                                                                                                                                                                                                                                                                                                                                                                                                                                                                                                                                                                                                                                                                                                                                                                                                                                                                                                                                                                                                                                                                                                                | 2.7702498  | 2.5576368  | 0.4410408  |            |            |     |    |            |           |            |     |    |           |           |            |     |    |            |           |            |     |    |           |           |            |     |    |           |           |            |     |    |            |            |            |     |    |           |            |            |     |    |            |           |            |      |    |           |           |            |      |     |           |            |            |      |    |           |           |            |      |    |           |            |            |      |     |           |            |            |      |     |            |            |            |      |    |           |            |            |      |    |           |            |            |      |    |           |            |            |      |    |            |            |            |      |     |            |            |            |      |     |            |            |            |      |     |            |            |            |      |    |            |            |           |      |     |           |            |           |      |    |            |            |           |      |     |            |            |           |      |     |            |            |            |      |    |            |            |           |      |     |            |           |           |      |     |            |            |           |      |     |            |           |            |      |     |            |            |           |      |     |            |           |           |
| 12 C                                                                                | C5                                                                                                                                                                                                                                                                                                                                                                                                                                                                                                                                                                                                                                                                                                                                                                                                                                                                                                                                                                                                                                                                                                                                                                                                                                                                                                                                                                                                                                                                                                                                                                                                                                                                                                                                                                                                                                                                                                                                                                                                                                                                                                                                                                                                                                                                                                                                                                                                                                                                                                                                                                                                                                                                                                                                                                                                                                                                                                                                                                                                                                                                                                                 | 3.9661453  | 1.4531058  | 1.8608102  |            |            |     |    |            |           |            |     |    |           |           |            |     |    |            |           |            |     |    |           |           |            |     |    |           |           |            |     |    |            |            |            |     |    |           |            |            |     |    |            |           |            |      |    |           |           |            |      |     |           |            |            |      |    |           |           |            |      |    |           |            |            |      |     |           |            |            |      |     |            |            |            |      |    |           |            |            |      |    |           |            |            |      |    |           |            |            |      |    |            |            |            |      |     |            |            |            |      |     |            |            |            |      |     |            |            |            |      |    |            |            |           |      |     |           |            |           |      |    |            |            |           |      |     |            |            |           |      |     |            |            |            |      |    |            |            |           |      |     |            |           |           |      |     |            |            |           |      |     |            |           |            |      |     |            |            |           |      |     |            |           |           |
| 13 H                                                                                | H7                                                                                                                                                                                                                                                                                                                                                                                                                                                                                                                                                                                                                                                                                                                                                                                                                                                                                                                                                                                                                                                                                                                                                                                                                                                                                                                                                                                                                                                                                                                                                                                                                                                                                                                                                                                                                                                                                                                                                                                                                                                                                                                                                                                                                                                                                                                                                                                                                                                                                                                                                                                                                                                                                                                                                                                                                                                                                                                                                                                                                                                                                                                 | 3.8410080  | 0.7081945  | 2.6554228  |            |            |     |    |            |           |            |     |    |           |           |            |     |    |            |           |            |     |    |           |           |            |     |    |           |           |            |     |    |            |            |            |     |    |           |            |            |     |    |            |           |            |      |    |           |           |            |      |     |           |            |            |      |    |           |           |            |      |    |           |            |            |      |     |           |            |            |      |     |            |            |            |      |    |           |            |            |      |    |           |            |            |      |    |           |            |            |      |    |            |            |            |      |     |            |            |            |      |     |            |            |            |      |     |            |            |            |      |    |            |            |           |      |     |           |            |           |      |    |            |            |           |      |     |            |            |           |      |     |            |            |            |      |    |            |            |           |      |     |            |           |           |      |     |            |            |           |      |     |            |           |            |      |     |            |            |           |      |     |            |           |           |
| 14 H                                                                                | H11                                                                                                                                                                                                                                                                                                                                                                                                                                                                                                                                                                                                                                                                                                                                                                                                                                                                                                                                                                                                                                                                                                                                                                                                                                                                                                                                                                                                                                                                                                                                                                                                                                                                                                                                                                                                                                                                                                                                                                                                                                                                                                                                                                                                                                                                                                                                                                                                                                                                                                                                                                                                                                                                                                                                                                                                                                                                                                                                                                                                                                                                                                                | 4.4292284  | 2.3417959  | 2.3022164  |            |            |     |    |            |           |            |     |    |           |           |            |     |    |            |           |            |     |    |           |           |            |     |    |           |           |            |     |    |            |            |            |     |    |           |            |            |     |    |            |           |            |      |    |           |           |            |      |     |           |            |            |      |    |           |           |            |      |    |           |            |            |      |     |           |            |            |      |     |            |            |            |      |    |           |            |            |      |    |           |            |            |      |    |           |            |            |      |    |            |            |            |      |     |            |            |            |      |     |            |            |            |      |     |            |            |            |      |    |            |            |           |      |     |           |            |           |      |    |            |            |           |      |     |            |            |           |      |     |            |            |            |      |    |            |            |           |      |     |            |           |           |      |     |            |            |           |      |     |            |           |            |      |     |            |            |           |      |     |            |           |           |
| 15 H                                                                                | H12                                                                                                                                                                                                                                                                                                                                                                                                                                                                                                                                                                                                                                                                                                                                                                                                                                                                                                                                                                                                                                                                                                                                                                                                                                                                                                                                                                                                                                                                                                                                                                                                                                                                                                                                                                                                                                                                                                                                                                                                                                                                                                                                                                                                                                                                                                                                                                                                                                                                                                                                                                                                                                                                                                                                                                                                                                                                                                                                                                                                                                                                                                                | 4.6642498  | 1.0401146  | 1.1233239  |            |            |     |    |            |           |            |     |    |           |           |            |     |    |            |           |            |     |    |           |           |            |     |    |           |           |            |     |    |            |            |            |     |    |           |            |            |     |    |            |           |            |      |    |           |           |            |      |     |           |            |            |      |    |           |           |            |      |    |           |            |            |      |     |           |            |            |      |     |            |            |            |      |    |           |            |            |      |    |           |            |            |      |    |           |            |            |      |    |            |            |            |      |     |            |            |            |      |     |            |            |            |      |     |            |            |            |      |    |            |            |           |      |     |           |            |           |      |    |            |            |           |      |     |            |            |           |      |     |            |            |            |      |    |            |            |           |      |     |            |           |           |      |     |            |            |           |      |     |            |           |            |      |     |            |            |           |      |     |            |           |           |
| 16 O                                                                                | O1                                                                                                                                                                                                                                                                                                                                                                                                                                                                                                                                                                                                                                                                                                                                                                                                                                                                                                                                                                                                                                                                                                                                                                                                                                                                                                                                                                                                                                                                                                                                                                                                                                                                                                                                                                                                                                                                                                                                                                                                                                                                                                                                                                                                                                                                                                                                                                                                                                                                                                                                                                                                                                                                                                                                                                                                                                                                                                                                                                                                                                                                                                                 | 0.7348245  | -0.6455925 | -1.8386510 |            |            |     |    |            |           |            |     |    |           |           |            |     |    |            |           |            |     |    |           |           |            |     |    |           |           |            |     |    |            |            |            |     |    |           |            |            |     |    |            |           |            |      |    |           |           |            |      |     |           |            |            |      |    |           |           |            |      |    |           |            |            |      |     |           |            |            |      |     |            |            |            |      |    |           |            |            |      |    |           |            |            |      |    |           |            |            |      |    |            |            |            |      |     |            |            |            |      |     |            |            |            |      |     |            |            |            |      |    |            |            |           |      |     |           |            |           |      |    |            |            |           |      |     |            |            |           |      |     |            |            |            |      |    |            |            |           |      |     |            |           |           |      |     |            |            |           |      |     |            |           |            |      |     |            |            |           |      |     |            |           |           |
| 17 C                                                                                | C6                                                                                                                                                                                                                                                                                                                                                                                                                                                                                                                                                                                                                                                                                                                                                                                                                                                                                                                                                                                                                                                                                                                                                                                                                                                                                                                                                                                                                                                                                                                                                                                                                                                                                                                                                                                                                                                                                                                                                                                                                                                                                                                                                                                                                                                                                                                                                                                                                                                                                                                                                                                                                                                                                                                                                                                                                                                                                                                                                                                                                                                                                                                 | 0.2542187  | -1.3329414 | -2.8964163 |            |            |     |    |            |           |            |     |    |           |           |            |     |    |            |           |            |     |    |           |           |            |     |    |           |           |            |     |    |            |            |            |     |    |           |            |            |     |    |            |           |            |      |    |           |           |            |      |     |           |            |            |      |    |           |           |            |      |    |           |            |            |      |     |           |            |            |      |     |            |            |            |      |    |           |            |            |      |    |           |            |            |      |    |           |            |            |      |    |            |            |            |      |     |            |            |            |      |     |            |            |            |      |     |            |            |            |      |    |            |            |           |      |     |           |            |           |      |    |            |            |           |      |     |            |            |           |      |     |            |            |            |      |    |            |            |           |      |     |            |           |           |      |     |            |            |           |      |     |            |           |            |      |     |            |            |           |      |     |            |           |           |
| 18 O                                                                                | O2                                                                                                                                                                                                                                                                                                                                                                                                                                                                                                                                                                                                                                                                                                                                                                                                                                                                                                                                                                                                                                                                                                                                                                                                                                                                                                                                                                                                                                                                                                                                                                                                                                                                                                                                                                                                                                                                                                                                                                                                                                                                                                                                                                                                                                                                                                                                                                                                                                                                                                                                                                                                                                                                                                                                                                                                                                                                                                                                                                                                                                                                                                                 | 1.0392089  | -1.6533544 | -3.7588516 |            |            |     |    |            |           |            |     |    |           |           |            |     |    |            |           |            |     |    |           |           |            |     |    |           |           |            |     |    |            |            |            |     |    |           |            |            |     |    |            |           |            |      |    |           |           |            |      |     |           |            |            |      |    |           |           |            |      |    |           |            |            |      |     |           |            |            |      |     |            |            |            |      |    |           |            |            |      |    |           |            |            |      |    |           |            |            |      |    |            |            |            |      |     |            |            |            |      |     |            |            |            |      |     |            |            |            |      |    |            |            |           |      |     |           |            |           |      |    |            |            |           |      |     |            |            |           |      |     |            |            |            |      |    |            |            |           |      |     |            |           |           |      |     |            |            |           |      |     |            |           |            |      |     |            |            |           |      |     |            |           |           |
| 19 C                                                                                | C7                                                                                                                                                                                                                                                                                                                                                                                                                                                                                                                                                                                                                                                                                                                                                                                                                                                                                                                                                                                                                                                                                                                                                                                                                                                                                                                                                                                                                                                                                                                                                                                                                                                                                                                                                                                                                                                                                                                                                                                                                                                                                                                                                                                                                                                                                                                                                                                                                                                                                                                                                                                                                                                                                                                                                                                                                                                                                                                                                                                                                                                                                                                 | -1.2201195 | -1.6439009 | -2.9539283 |            |            |     |    |            |           |            |     |    |           |           |            |     |    |            |           |            |     |    |           |           |            |     |    |           |           |            |     |    |            |            |            |     |    |           |            |            |     |    |            |           |            |      |    |           |           |            |      |     |           |            |            |      |    |           |           |            |      |    |           |            |            |      |     |           |            |            |      |     |            |            |            |      |    |           |            |            |      |    |           |            |            |      |    |           |            |            |      |    |            |            |            |      |     |            |            |            |      |     |            |            |            |      |     |            |            |            |      |    |            |            |           |      |     |           |            |           |      |    |            |            |           |      |     |            |            |           |      |     |            |            |            |      |    |            |            |           |      |     |            |           |           |      |     |            |            |           |      |     |            |           |            |      |     |            |            |           |      |     |            |           |           |
| 20 H                                                                                | H1                                                                                                                                                                                                                                                                                                                                                                                                                                                                                                                                                                                                                                                                                                                                                                                                                                                                                                                                                                                                                                                                                                                                                                                                                                                                                                                                                                                                                                                                                                                                                                                                                                                                                                                                                                                                                                                                                                                                                                                                                                                                                                                                                                                                                                                                                                                                                                                                                                                                                                                                                                                                                                                                                                                                                                                                                                                                                                                                                                                                                                                                                                                 | -1.5533545 | -2.1830926 | -2.0624910 |            |            |     |    |            |           |            |     |    |           |           |            |     |    |            |           |            |     |    |           |           |            |     |    |           |           |            |     |    |            |            |            |     |    |           |            |            |     |    |            |           |            |      |    |           |           |            |      |     |           |            |            |      |    |           |           |            |      |    |           |            |            |      |     |           |            |            |      |     |            |            |            |      |    |           |            |            |      |    |           |            |            |      |    |           |            |            |      |    |            |            |            |      |     |            |            |            |      |     |            |            |            |      |     |            |            |            |      |    |            |            |           |      |     |           |            |           |      |    |            |            |           |      |     |            |            |           |      |     |            |            |            |      |    |            |            |           |      |     |            |           |           |      |     |            |            |           |      |     |            |           |            |      |     |            |            |           |      |     |            |           |           |
| 21 H                                                                                | H13                                                                                                                                                                                                                                                                                                                                                                                                                                                                                                                                                                                                                                                                                                                                                                                                                                                                                                                                                                                                                                                                                                                                                                                                                                                                                                                                                                                                                                                                                                                                                                                                                                                                                                                                                                                                                                                                                                                                                                                                                                                                                                                                                                                                                                                                                                                                                                                                                                                                                                                                                                                                                                                                                                                                                                                                                                                                                                                                                                                                                                                                                                                | -1.4048206 | -2.2531964 | -3.8379749 |            |            |     |    |            |           |            |     |    |           |           |            |     |    |            |           |            |     |    |           |           |            |     |    |           |           |            |     |    |            |            |            |     |    |           |            |            |     |    |            |           |            |      |    |           |           |            |      |     |           |            |            |      |    |           |           |            |      |    |           |            |            |      |     |           |            |            |      |     |            |            |            |      |    |           |            |            |      |    |           |            |            |      |    |           |            |            |      |    |            |            |            |      |     |            |            |            |      |     |            |            |            |      |     |            |            |            |      |    |            |            |           |      |     |           |            |           |      |    |            |            |           |      |     |            |            |           |      |     |            |            |            |      |    |            |            |           |      |     |            |           |           |      |     |            |            |           |      |     |            |           |            |      |     |            |            |           |      |     |            |           |           |
| 22 H                                                                                | H14                                                                                                                                                                                                                                                                                                                                                                                                                                                                                                                                                                                                                                                                                                                                                                                                                                                                                                                                                                                                                                                                                                                                                                                                                                                                                                                                                                                                                                                                                                                                                                                                                                                                                                                                                                                                                                                                                                                                                                                                                                                                                                                                                                                                                                                                                                                                                                                                                                                                                                                                                                                                                                                                                                                                                                                                                                                                                                                                                                                                                                                                                                                | -1.8049300 | -0.7210941 | -3.0264015 |            |            |     |    |            |           |            |     |    |           |           |            |     |    |            |           |            |     |    |           |           |            |     |    |           |           |            |     |    |            |            |            |     |    |           |            |            |     |    |            |           |            |      |    |           |           |            |      |     |           |            |            |      |    |           |           |            |      |    |           |            |            |      |     |           |            |            |      |     |            |            |            |      |    |           |            |            |      |    |           |            |            |      |    |           |            |            |      |    |            |            |            |      |     |            |            |            |      |     |            |            |            |      |     |            |            |            |      |    |            |            |           |      |     |           |            |           |      |    |            |            |           |      |     |            |            |           |      |     |            |            |            |      |    |            |            |           |      |     |            |           |           |      |     |            |            |           |      |     |            |           |            |      |     |            |            |           |      |     |            |           |           |
| 23 C                                                                                | C8                                                                                                                                                                                                                                                                                                                                                                                                                                                                                                                                                                                                                                                                                                                                                                                                                                                                                                                                                                                                                                                                                                                                                                                                                                                                                                                                                                                                                                                                                                                                                                                                                                                                                                                                                                                                                                                                                                                                                                                                                                                                                                                                                                                                                                                                                                                                                                                                                                                                                                                                                                                                                                                                                                                                                                                                                                                                                                                                                                                                                                                                                                                 | -0.2855593 | -1.4288356 | 0.1726218  |            |            |     |    |            |           |            |     |    |           |           |            |     |    |            |           |            |     |    |           |           |            |     |    |           |           |            |     |    |            |            |            |     |    |           |            |            |     |    |            |           |            |      |    |           |           |            |      |     |           |            |            |      |    |           |           |            |      |    |           |            |            |      |     |           |            |            |      |     |            |            |            |      |    |           |            |            |      |    |           |            |            |      |    |           |            |            |      |    |            |            |            |      |     |            |            |            |      |     |            |            |            |      |     |            |            |            |      |    |            |            |           |      |     |           |            |           |      |    |            |            |           |      |     |            |            |           |      |     |            |            |            |      |    |            |            |           |      |     |            |           |           |      |     |            |            |           |      |     |            |           |            |      |     |            |            |           |      |     |            |           |           |
| 24 H                                                                                | H15                                                                                                                                                                                                                                                                                                                                                                                                                                                                                                                                                                                                                                                                                                                                                                                                                                                                                                                                                                                                                                                                                                                                                                                                                                                                                                                                                                                                                                                                                                                                                                                                                                                                                                                                                                                                                                                                                                                                                                                                                                                                                                                                                                                                                                                                                                                                                                                                                                                                                                                                                                                                                                                                                                                                                                                                                                                                                                                                                                                                                                                                                                                | 0.5750142  | -2.0934612 | 0.1865152  |            |            |     |    |            |           |            |     |    |           |           |            |     |    |            |           |            |     |    |           |           |            |     |    |           |           |            |     |    |            |            |            |     |    |           |            |            |     |    |            |           |            |      |    |           |           |            |      |     |           |            |            |      |    |           |           |            |      |    |           |            |            |      |     |           |            |            |      |     |            |            |            |      |    |           |            |            |      |    |           |            |            |      |    |           |            |            |      |    |            |            |            |      |     |            |            |            |      |     |            |            |            |      |     |            |            |            |      |    |            |            |           |      |     |           |            |           |      |    |            |            |           |      |     |            |            |           |      |     |            |            |            |      |    |            |            |           |      |     |            |           |           |      |     |            |            |           |      |     |            |           |            |      |     |            |            |           |      |     |            |           |           |
| 25 C                                                                                | C9                                                                                                                                                                                                                                                                                                                                                                                                                                                                                                                                                                                                                                                                                                                                                                                                                                                                                                                                                                                                                                                                                                                                                                                                                                                                                                                                                                                                                                                                                                                                                                                                                                                                                                                                                                                                                                                                                                                                                                                                                                                                                                                                                                                                                                                                                                                                                                                                                                                                                                                                                                                                                                                                                                                                                                                                                                                                                                                                                                                                                                                                                                                 | -1.3394890 | -1.7348943 | 0.9356581  |            |            |     |    |            |           |            |     |    |           |           |            |     |    |            |           |            |     |    |           |           |            |     |    |           |           |            |     |    |            |            |            |     |    |           |            |            |     |    |            |           |            |      |    |           |           |            |      |     |           |            |            |      |    |           |           |            |      |    |           |            |            |      |     |           |            |            |      |     |            |            |            |      |    |           |            |            |      |    |           |            |            |      |    |           |            |            |      |    |            |            |            |      |     |            |            |            |      |     |            |            |            |      |     |            |            |            |      |    |            |            |           |      |     |           |            |           |      |    |            |            |           |      |     |            |            |           |      |     |            |            |            |      |    |            |            |           |      |     |            |           |           |      |     |            |            |           |      |     |            |           |            |      |     |            |            |           |      |     |            |           |           |
| 26 I                                                                                | I1                                                                                                                                                                                                                                                                                                                                                                                                                                                                                                                                                                                                                                                                                                                                                                                                                                                                                                                                                                                                                                                                                                                                                                                                                                                                                                                                                                                                                                                                                                                                                                                                                                                                                                                                                                                                                                                                                                                                                                                                                                                                                                                                                                                                                                                                                                                                                                                                                                                                                                                                                                                                                                                                                                                                                                                                                                                                                                                                                                                                                                                                                                                 | -1.2965257 | -3.4955033 | 2.0989127  |            |            |     |    |            |           |            |     |    |           |           |            |     |    |            |           |            |     |    |           |           |            |     |    |           |           |            |     |    |            |            |            |     |    |           |            |            |     |    |            |           |            |      |    |           |           |            |      |     |           |            |            |      |    |           |           |            |      |    |           |            |            |      |     |           |            |            |      |     |            |            |            |      |    |           |            |            |      |    |           |            |            |      |    |           |            |            |      |    |            |            |            |      |     |            |            |            |      |     |            |            |            |      |     |            |            |            |      |    |            |            |           |      |     |           |            |           |      |    |            |            |           |      |     |            |            |           |      |     |            |            |            |      |    |            |            |           |      |     |            |           |           |      |     |            |            |           |      |     |            |           |            |      |     |            |            |           |      |     |            |           |           |
| 27 C                                                                                | C10                                                                                                                                                                                                                                                                                                                                                                                                                                                                                                                                                                                                                                                                                                                                                                                                                                                                                                                                                                                                                                                                                                                                                                                                                                                                                                                                                                                                                                                                                                                                                                                                                                                                                                                                                                                                                                                                                                                                                                                                                                                                                                                                                                                                                                                                                                                                                                                                                                                                                                                                                                                                                                                                                                                                                                                                                                                                                                                                                                                                                                                                                                                | -2.6319246 | -0.9852886 | 1.0247695  |            |            |     |    |            |           |            |     |    |           |           |            |     |    |            |           |            |     |    |           |           |            |     |    |           |           |            |     |    |            |            |            |     |    |           |            |            |     |    |            |           |            |      |    |           |           |            |      |     |           |            |            |      |    |           |           |            |      |    |           |            |            |      |     |           |            |            |      |     |            |            |            |      |    |           |            |            |      |    |           |            |            |      |    |           |            |            |      |    |            |            |            |      |     |            |            |            |      |     |            |            |            |      |     |            |            |            |      |    |            |            |           |      |     |           |            |           |      |    |            |            |           |      |     |            |            |           |      |     |            |            |            |      |    |            |            |           |      |     |            |           |           |      |     |            |            |           |      |     |            |           |            |      |     |            |            |           |      |     |            |           |           |
| 28 O                                                                                | O3                                                                                                                                                                                                                                                                                                                                                                                                                                                                                                                                                                                                                                                                                                                                                                                                                                                                                                                                                                                                                                                                                                                                                                                                                                                                                                                                                                                                                                                                                                                                                                                                                                                                                                                                                                                                                                                                                                                                                                                                                                                                                                                                                                                                                                                                                                                                                                                                                                                                                                                                                                                                                                                                                                                                                                                                                                                                                                                                                                                                                                                                                                                 | -3.6765061 | -1.4665875 | 1.3997712  |            |            |     |    |            |           |            |     |    |           |           |            |     |    |            |           |            |     |    |           |           |            |     |    |           |           |            |     |    |            |            |            |     |    |           |            |            |     |    |            |           |            |      |    |           |           |            |      |     |           |            |            |      |    |           |           |            |      |    |           |            |            |      |     |           |            |            |      |     |            |            |            |      |    |           |            |            |      |    |           |            |            |      |    |           |            |            |      |    |            |            |            |      |     |            |            |            |      |     |            |            |            |      |     |            |            |            |      |    |            |            |           |      |     |           |            |           |      |    |            |            |           |      |     |            |            |           |      |     |            |            |            |      |    |            |            |           |      |     |            |           |           |      |     |            |            |           |      |     |            |           |            |      |     |            |            |           |      |     |            |           |           |
| 29 O                                                                                | O4                                                                                                                                                                                                                                                                                                                                                                                                                                                                                                                                                                                                                                                                                                                                                                                                                                                                                                                                                                                                                                                                                                                                                                                                                                                                                                                                                                                                                                                                                                                                                                                                                                                                                                                                                                                                                                                                                                                                                                                                                                                                                                                                                                                                                                                                                                                                                                                                                                                                                                                                                                                                                                                                                                                                                                                                                                                                                                                                                                                                                                                                                                                 | -2.4929034 | 0.2846837  | 0.6430080  |            |            |     |    |            |           |            |     |    |           |           |            |     |    |            |           |            |     |    |           |           |            |     |    |           |           |            |     |    |            |            |            |     |    |           |            |            |     |    |            |           |            |      |    |           |           |            |      |     |           |            |            |      |    |           |           |            |      |    |           |            |            |      |     |           |            |            |      |     |            |            |            |      |    |           |            |            |      |    |           |            |            |      |    |           |            |            |      |    |            |            |            |      |     |            |            |            |      |     |            |            |            |      |     |            |            |            |      |    |            |            |           |      |     |           |            |           |      |    |            |            |           |      |     |            |            |           |      |     |            |            |            |      |    |            |            |           |      |     |            |           |           |      |     |            |            |           |      |     |            |           |            |      |     |            |            |           |      |     |            |           |           |
| 30 C                                                                                | C11                                                                                                                                                                                                                                                                                                                                                                                                                                                                                                                                                                                                                                                                                                                                                                                                                                                                                                                                                                                                                                                                                                                                                                                                                                                                                                                                                                                                                                                                                                                                                                                                                                                                                                                                                                                                                                                                                                                                                                                                                                                                                                                                                                                                                                                                                                                                                                                                                                                                                                                                                                                                                                                                                                                                                                                                                                                                                                                                                                                                                                                                                                                | -3.6900115 | 1.0771354  | 0.6460746  |            |            |     |    |            |           |            |     |    |           |           |            |     |    |            |           |            |     |    |           |           |            |     |    |           |           |            |     |    |            |            |            |     |    |           |            |            |     |    |            |           |            |      |    |           |           |            |      |     |           |            |            |      |    |           |           |            |      |    |           |            |            |      |     |           |            |            |      |     |            |            |            |      |    |           |            |            |      |    |           |            |            |      |    |           |            |            |      |    |            |            |            |      |     |            |            |            |      |     |            |            |            |      |     |            |            |            |      |    |            |            |           |      |     |           |            |           |      |    |            |            |           |      |     |            |            |           |      |     |            |            |            |      |    |            |            |           |      |     |            |           |           |      |     |            |            |           |      |     |            |           |            |      |     |            |            |           |      |     |            |           |           |
| 31 H                                                                                | H2                                                                                                                                                                                                                                                                                                                                                                                                                                                                                                                                                                                                                                                                                                                                                                                                                                                                                                                                                                                                                                                                                                                                                                                                                                                                                                                                                                                                                                                                                                                                                                                                                                                                                                                                                                                                                                                                                                                                                                                                                                                                                                                                                                                                                                                                                                                                                                                                                                                                                                                                                                                                                                                                                                                                                                                                                                                                                                                                                                                                                                                                                                                 | -4.4248509 | 0.6520822  | -0.0403435 |            |            |     |    |            |           |            |     |    |           |           |            |     |    |            |           |            |     |    |           |           |            |     |    |           |           |            |     |    |            |            |            |     |    |           |            |            |     |    |            |           |            |      |    |           |           |            |      |     |           |            |            |      |    |           |           |            |      |    |           |            |            |      |     |           |            |            |      |     |            |            |            |      |    |           |            |            |      |    |           |            |            |      |    |           |            |            |      |    |            |            |            |      |     |            |            |            |      |     |            |            |            |      |     |            |            |            |      |    |            |            |           |      |     |           |            |           |      |    |            |            |           |      |     |            |            |           |      |     |            |            |            |      |    |            |            |           |      |     |            |           |           |      |     |            |            |           |      |     |            |           |            |      |     |            |            |           |      |     |            |           |           |
| 32 H                                                                                | H16                                                                                                                                                                                                                                                                                                                                                                                                                                                                                                                                                                                                                                                                                                                                                                                                                                                                                                                                                                                                                                                                                                                                                                                                                                                                                                                                                                                                                                                                                                                                                                                                                                                                                                                                                                                                                                                                                                                                                                                                                                                                                                                                                                                                                                                                                                                                                                                                                                                                                                                                                                                                                                                                                                                                                                                                                                                                                                                                                                                                                                                                                                                | -3.3795328 | 2.0659078  | 0.3135146  |            |            |     |    |            |           |            |     |    |           |           |            |     |    |            |           |            |     |    |           |           |            |     |    |           |           |            |     |    |            |            |            |     |    |           |            |            |     |    |            |           |            |      |    |           |           |            |      |     |           |            |            |      |    |           |           |            |      |    |           |            |            |      |     |           |            |            |      |     |            |            |            |      |    |           |            |            |      |    |           |            |            |      |    |           |            |            |      |    |            |            |            |      |     |            |            |            |      |     |            |            |            |      |     |            |            |            |      |    |            |            |           |      |     |           |            |           |      |    |            |            |           |      |     |            |            |           |      |     |            |            |            |      |    |            |            |           |      |     |            |           |           |      |     |            |            |           |      |     |            |           |            |      |     |            |            |           |      |     |            |           |           |
| 33 H                                                                                | H17                                                                                                                                                                                                                                                                                                                                                                                                                                                                                                                                                                                                                                                                                                                                                                                                                                                                                                                                                                                                                                                                                                                                                                                                                                                                                                                                                                                                                                                                                                                                                                                                                                                                                                                                                                                                                                                                                                                                                                                                                                                                                                                                                                                                                                                                                                                                                                                                                                                                                                                                                                                                                                                                                                                                                                                                                                                                                                                                                                                                                                                                                                                | -4.1060543 | 1.1215933  | 1.6542424  |            |            |     |    |            |           |            |     |    |           |           |            |     |    |            |           |            |     |    |           |           |            |     |    |           |           |            |     |    |            |            |            |     |    |           |            |            |     |    |            |           |            |      |    |           |           |            |      |     |           |            |            |      |    |           |           |            |      |    |           |            |            |      |     |           |            |            |      |     |            |            |            |      |    |           |            |            |      |    |           |            |            |      |    |           |            |            |      |    |            |            |            |      |     |            |            |            |      |     |            |            |            |      |     |            |            |            |      |    |            |            |           |      |     |           |            |           |      |    |            |            |           |      |     |            |            |           |      |     |            |            |            |      |    |            |            |           |      |     |            |           |           |      |     |            |            |           |      |     |            |           |            |      |     |            |            |           |      |     |            |           |           |
|  | <table border="1"> <tbody> <tr><td>1 C</td><td>C1</td><td>0.0603401</td><td>-0.2855638</td><td>-0.7319777</td></tr> <tr><td>2 H</td><td>H3</td><td>-0.7959895</td><td>0.1116896</td><td>-1.2817228</td></tr> <tr><td>3 C</td><td>C2</td><td>0.9035816</td><td>0.8841214</td><td>-0.2263777</td></tr> <tr><td>4 H</td><td>H5</td><td>0.2457137</td><td>1.5214088</td><td>0.3770932</td></tr> <tr><td>5 H</td><td>H6</td><td>1.2024531</td><td>1.4704501</td><td>-1.1042918</td></tr> <tr><td>6 C</td><td>C3</td><td>2.1402549</td><td>0.4933951</td><td>0.5829139</td></tr> <tr><td>7 H</td><td>H4</td><td>1.8375483</td><td>-0.0428954</td><td>1.4921217</td></tr> <tr><td>8 H</td><td>H8</td><td>2.7577636</td><td>-0.1992144</td><td>-0.0020727</td></tr> <tr><td>9 C</td><td>C4</td><td>2.9776569</td><td>1.7101927</td><td>0.9791483</td></tr> <tr><td>10 H</td><td>H9</td><td>2.3542195</td><td>2.4053323</td><td>1.5572341</td></tr> <tr><td>11 H</td><td>H10</td><td>3.2837900</td><td>2.2488143</td><td>0.0725951</td></tr> <tr><td>12 C</td><td>C5</td><td>4.2138297</td><td>1.3308953</td><td>1.7927602</td></tr> <tr><td>13 H</td><td>H7</td><td>3.9308807</td><td>0.8151995</td><td>2.7178767</td></tr> <tr><td>14 H</td><td>H11</td><td>4.7985207</td><td>2.2157419</td><td>2.0656364</td></tr> <tr><td>15 H</td><td>H12</td><td>4.8654122</td><td>0.6588881</td><td>1.2222077</td></tr> <tr><td>16 O</td><td>O1</td><td>0.8953951</td><td>-1.0574631</td><td>-1.6096387</td></tr> <tr><td>17 C</td><td>C6</td><td>0.3903927</td><td>-1.8423899</td><td>-2.5854715</td></tr> <tr><td>18 O</td><td>O2</td><td>1.1707055</td><td>-2.5185937</td><td>-3.2157957</td></tr> <tr><td>19 C</td><td>C7</td><td>-1.0903599</td><td>-1.8037915</td><td>-2.8601831</td></tr> <tr><td>20 H</td><td>H1</td><td>-1.6851073</td><td>-1.9781012</td><td>-1.9601215</td></tr> <tr><td>21 H</td><td>H13</td><td>-1.3160321</td><td>-2.5652016</td><td>-3.6062167</td></tr> <tr><td>22 H</td><td>H14</td><td>-1.3719720</td><td>-0.8220467</td><td>-3.2561781</td></tr> <tr><td>23 C</td><td>C8</td><td>-0.4244438</td><td>-1.1879020</td><td>0.3931041</td></tr> <tr><td>24 H</td><td>H15</td><td>0.3257319</td><td>-1.8477161</td><td>0.8295784</td></tr> <tr><td>25 C</td><td>C9</td><td>-1.6497170</td><td>-1.1713932</td><td>0.8544154</td></tr> <tr><td>26 C</td><td>C10</td><td>-2.9439190</td><td>-0.5718993</td><td>0.5724538</td></tr> <tr><td>27 O</td><td>O3</td><td>-3.4574197</td><td>-0.5813495</td><td>-0.5322841</td></tr> <tr><td>28 O</td><td>O4</td><td>-3.5041429</td><td>-0.0493025</td><td>1.6617359</td></tr> <tr><td>29 C</td><td>C11</td><td>-4.7935960</td><td>0.5524270</td><td>1.4737172</td></tr> <tr><td>30 H</td><td>H2</td><td>-4.7207030</td><td>1.3925970</td><td>0.7797529</td></tr> <tr><td>31 H</td><td>H16</td><td>-5.0983772</td><td>0.8970765</td><td>2.4602198</td></tr> <tr><td>32 H</td><td>H17</td><td>-5.5024109</td><td>-0.1834051</td><td>1.0877672</td></tr> </tbody> </table>                                                                                          | 1 C        | C1         | 0.0603401  | -0.2855638 | -0.7319777 | 2 H | H3 | -0.7959895 | 0.1116896 | -1.2817228 | 3 C | C2 | 0.9035816 | 0.8841214 | -0.2263777 | 4 H | H5 | 0.2457137  | 1.5214088 | 0.3770932  | 5 H | H6 | 1.2024531 | 1.4704501 | -1.1042918 | 6 C | C3 | 2.1402549 | 0.4933951 | 0.5829139  | 7 H | H4 | 1.8375483  | -0.0428954 | 1.4921217  | 8 H | H8 | 2.7577636 | -0.1992144 | -0.0020727 | 9 C | C4 | 2.9776569  | 1.7101927 | 0.9791483  | 10 H | H9 | 2.3542195 | 2.4053323 | 1.5572341  | 11 H | H10 | 3.2837900 | 2.2488143  | 0.0725951  | 12 C | C5 | 4.2138297 | 1.3308953 | 1.7927602  | 13 H | H7 | 3.9308807 | 0.8151995  | 2.7178767  | 14 H | H11 | 4.7985207 | 2.2157419  | 2.0656364  | 15 H | H12 | 4.8654122  | 0.6588881  | 1.2222077  | 16 O | O1 | 0.8953951 | -1.0574631 | -1.6096387 | 17 C | C6 | 0.3903927 | -1.8423899 | -2.5854715 | 18 O | O2 | 1.1707055 | -2.5185937 | -3.2157957 | 19 C | C7 | -1.0903599 | -1.8037915 | -2.8601831 | 20 H | H1  | -1.6851073 | -1.9781012 | -1.9601215 | 21 H | H13 | -1.3160321 | -2.5652016 | -3.6062167 | 22 H | H14 | -1.3719720 | -0.8220467 | -3.2561781 | 23 C | C8 | -0.4244438 | -1.1879020 | 0.3931041 | 24 H | H15 | 0.3257319 | -1.8477161 | 0.8295784 | 25 C | C9 | -1.6497170 | -1.1713932 | 0.8544154 | 26 C | C10 | -2.9439190 | -0.5718993 | 0.5724538 | 27 O | O3  | -3.4574197 | -0.5813495 | -0.5322841 | 28 O | O4 | -3.5041429 | -0.0493025 | 1.6617359 | 29 C | C11 | -4.7935960 | 0.5524270 | 1.4737172 | 30 H | H2  | -4.7207030 | 1.3925970  | 0.7797529 | 31 H | H16 | -5.0983772 | 0.8970765 | 2.4602198  | 32 H | H17 | -5.5024109 | -0.1834051 | 1.0877672 |      |     |            |           |           |
| 1 C                                                                                 | C1                                                                                                                                                                                                                                                                                                                                                                                                                                                                                                                                                                                                                                                                                                                                                                                                                                                                                                                                                                                                                                                                                                                                                                                                                                                                                                                                                                                                                                                                                                                                                                                                                                                                                                                                                                                                                                                                                                                                                                                                                                                                                                                                                                                                                                                                                                                                                                                                                                                                                                                                                                                                                                                                                                                                                                                                                                                                                                                                                                                                                                                                                                                 | 0.0603401  | -0.2855638 | -0.7319777 |            |            |     |    |            |           |            |     |    |           |           |            |     |    |            |           |            |     |    |           |           |            |     |    |           |           |            |     |    |            |            |            |     |    |           |            |            |     |    |            |           |            |      |    |           |           |            |      |     |           |            |            |      |    |           |           |            |      |    |           |            |            |      |     |           |            |            |      |     |            |            |            |      |    |           |            |            |      |    |           |            |            |      |    |           |            |            |      |    |            |            |            |      |     |            |            |            |      |     |            |            |            |      |     |            |            |            |      |    |            |            |           |      |     |           |            |           |      |    |            |            |           |      |     |            |            |           |      |     |            |            |            |      |    |            |            |           |      |     |            |           |           |      |     |            |            |           |      |     |            |           |            |      |     |            |            |           |      |     |            |           |           |
| 2 H                                                                                 | H3                                                                                                                                                                                                                                                                                                                                                                                                                                                                                                                                                                                                                                                                                                                                                                                                                                                                                                                                                                                                                                                                                                                                                                                                                                                                                                                                                                                                                                                                                                                                                                                                                                                                                                                                                                                                                                                                                                                                                                                                                                                                                                                                                                                                                                                                                                                                                                                                                                                                                                                                                                                                                                                                                                                                                                                                                                                                                                                                                                                                                                                                                                                 | -0.7959895 | 0.1116896  | -1.2817228 |            |            |     |    |            |           |            |     |    |           |           |            |     |    |            |           |            |     |    |           |           |            |     |    |           |           |            |     |    |            |            |            |     |    |           |            |            |     |    |            |           |            |      |    |           |           |            |      |     |           |            |            |      |    |           |           |            |      |    |           |            |            |      |     |           |            |            |      |     |            |            |            |      |    |           |            |            |      |    |           |            |            |      |    |           |            |            |      |    |            |            |            |      |     |            |            |            |      |     |            |            |            |      |     |            |            |            |      |    |            |            |           |      |     |           |            |           |      |    |            |            |           |      |     |            |            |           |      |     |            |            |            |      |    |            |            |           |      |     |            |           |           |      |     |            |            |           |      |     |            |           |            |      |     |            |            |           |      |     |            |           |           |
| 3 C                                                                                 | C2                                                                                                                                                                                                                                                                                                                                                                                                                                                                                                                                                                                                                                                                                                                                                                                                                                                                                                                                                                                                                                                                                                                                                                                                                                                                                                                                                                                                                                                                                                                                                                                                                                                                                                                                                                                                                                                                                                                                                                                                                                                                                                                                                                                                                                                                                                                                                                                                                                                                                                                                                                                                                                                                                                                                                                                                                                                                                                                                                                                                                                                                                                                 | 0.9035816  | 0.8841214  | -0.2263777 |            |            |     |    |            |           |            |     |    |           |           |            |     |    |            |           |            |     |    |           |           |            |     |    |           |           |            |     |    |            |            |            |     |    |           |            |            |     |    |            |           |            |      |    |           |           |            |      |     |           |            |            |      |    |           |           |            |      |    |           |            |            |      |     |           |            |            |      |     |            |            |            |      |    |           |            |            |      |    |           |            |            |      |    |           |            |            |      |    |            |            |            |      |     |            |            |            |      |     |            |            |            |      |     |            |            |            |      |    |            |            |           |      |     |           |            |           |      |    |            |            |           |      |     |            |            |           |      |     |            |            |            |      |    |            |            |           |      |     |            |           |           |      |     |            |            |           |      |     |            |           |            |      |     |            |            |           |      |     |            |           |           |
| 4 H                                                                                 | H5                                                                                                                                                                                                                                                                                                                                                                                                                                                                                                                                                                                                                                                                                                                                                                                                                                                                                                                                                                                                                                                                                                                                                                                                                                                                                                                                                                                                                                                                                                                                                                                                                                                                                                                                                                                                                                                                                                                                                                                                                                                                                                                                                                                                                                                                                                                                                                                                                                                                                                                                                                                                                                                                                                                                                                                                                                                                                                                                                                                                                                                                                                                 | 0.2457137  | 1.5214088  | 0.3770932  |            |            |     |    |            |           |            |     |    |           |           |            |     |    |            |           |            |     |    |           |           |            |     |    |           |           |            |     |    |            |            |            |     |    |           |            |            |     |    |            |           |            |      |    |           |           |            |      |     |           |            |            |      |    |           |           |            |      |    |           |            |            |      |     |           |            |            |      |     |            |            |            |      |    |           |            |            |      |    |           |            |            |      |    |           |            |            |      |    |            |            |            |      |     |            |            |            |      |     |            |            |            |      |     |            |            |            |      |    |            |            |           |      |     |           |            |           |      |    |            |            |           |      |     |            |            |           |      |     |            |            |            |      |    |            |            |           |      |     |            |           |           |      |     |            |            |           |      |     |            |           |            |      |     |            |            |           |      |     |            |           |           |
| 5 H                                                                                 | H6                                                                                                                                                                                                                                                                                                                                                                                                                                                                                                                                                                                                                                                                                                                                                                                                                                                                                                                                                                                                                                                                                                                                                                                                                                                                                                                                                                                                                                                                                                                                                                                                                                                                                                                                                                                                                                                                                                                                                                                                                                                                                                                                                                                                                                                                                                                                                                                                                                                                                                                                                                                                                                                                                                                                                                                                                                                                                                                                                                                                                                                                                                                 | 1.2024531  | 1.4704501  | -1.1042918 |            |            |     |    |            |           |            |     |    |           |           |            |     |    |            |           |            |     |    |           |           |            |     |    |           |           |            |     |    |            |            |            |     |    |           |            |            |     |    |            |           |            |      |    |           |           |            |      |     |           |            |            |      |    |           |           |            |      |    |           |            |            |      |     |           |            |            |      |     |            |            |            |      |    |           |            |            |      |    |           |            |            |      |    |           |            |            |      |    |            |            |            |      |     |            |            |            |      |     |            |            |            |      |     |            |            |            |      |    |            |            |           |      |     |           |            |           |      |    |            |            |           |      |     |            |            |           |      |     |            |            |            |      |    |            |            |           |      |     |            |           |           |      |     |            |            |           |      |     |            |           |            |      |     |            |            |           |      |     |            |           |           |
| 6 C                                                                                 | C3                                                                                                                                                                                                                                                                                                                                                                                                                                                                                                                                                                                                                                                                                                                                                                                                                                                                                                                                                                                                                                                                                                                                                                                                                                                                                                                                                                                                                                                                                                                                                                                                                                                                                                                                                                                                                                                                                                                                                                                                                                                                                                                                                                                                                                                                                                                                                                                                                                                                                                                                                                                                                                                                                                                                                                                                                                                                                                                                                                                                                                                                                                                 | 2.1402549  | 0.4933951  | 0.5829139  |            |            |     |    |            |           |            |     |    |           |           |            |     |    |            |           |            |     |    |           |           |            |     |    |           |           |            |     |    |            |            |            |     |    |           |            |            |     |    |            |           |            |      |    |           |           |            |      |     |           |            |            |      |    |           |           |            |      |    |           |            |            |      |     |           |            |            |      |     |            |            |            |      |    |           |            |            |      |    |           |            |            |      |    |           |            |            |      |    |            |            |            |      |     |            |            |            |      |     |            |            |            |      |     |            |            |            |      |    |            |            |           |      |     |           |            |           |      |    |            |            |           |      |     |            |            |           |      |     |            |            |            |      |    |            |            |           |      |     |            |           |           |      |     |            |            |           |      |     |            |           |            |      |     |            |            |           |      |     |            |           |           |
| 7 H                                                                                 | H4                                                                                                                                                                                                                                                                                                                                                                                                                                                                                                                                                                                                                                                                                                                                                                                                                                                                                                                                                                                                                                                                                                                                                                                                                                                                                                                                                                                                                                                                                                                                                                                                                                                                                                                                                                                                                                                                                                                                                                                                                                                                                                                                                                                                                                                                                                                                                                                                                                                                                                                                                                                                                                                                                                                                                                                                                                                                                                                                                                                                                                                                                                                 | 1.8375483  | -0.0428954 | 1.4921217  |            |            |     |    |            |           |            |     |    |           |           |            |     |    |            |           |            |     |    |           |           |            |     |    |           |           |            |     |    |            |            |            |     |    |           |            |            |     |    |            |           |            |      |    |           |           |            |      |     |           |            |            |      |    |           |           |            |      |    |           |            |            |      |     |           |            |            |      |     |            |            |            |      |    |           |            |            |      |    |           |            |            |      |    |           |            |            |      |    |            |            |            |      |     |            |            |            |      |     |            |            |            |      |     |            |            |            |      |    |            |            |           |      |     |           |            |           |      |    |            |            |           |      |     |            |            |           |      |     |            |            |            |      |    |            |            |           |      |     |            |           |           |      |     |            |            |           |      |     |            |           |            |      |     |            |            |           |      |     |            |           |           |
| 8 H                                                                                 | H8                                                                                                                                                                                                                                                                                                                                                                                                                                                                                                                                                                                                                                                                                                                                                                                                                                                                                                                                                                                                                                                                                                                                                                                                                                                                                                                                                                                                                                                                                                                                                                                                                                                                                                                                                                                                                                                                                                                                                                                                                                                                                                                                                                                                                                                                                                                                                                                                                                                                                                                                                                                                                                                                                                                                                                                                                                                                                                                                                                                                                                                                                                                 | 2.7577636  | -0.1992144 | -0.0020727 |            |            |     |    |            |           |            |     |    |           |           |            |     |    |            |           |            |     |    |           |           |            |     |    |           |           |            |     |    |            |            |            |     |    |           |            |            |     |    |            |           |            |      |    |           |           |            |      |     |           |            |            |      |    |           |           |            |      |    |           |            |            |      |     |           |            |            |      |     |            |            |            |      |    |           |            |            |      |    |           |            |            |      |    |           |            |            |      |    |            |            |            |      |     |            |            |            |      |     |            |            |            |      |     |            |            |            |      |    |            |            |           |      |     |           |            |           |      |    |            |            |           |      |     |            |            |           |      |     |            |            |            |      |    |            |            |           |      |     |            |           |           |      |     |            |            |           |      |     |            |           |            |      |     |            |            |           |      |     |            |           |           |
| 9 C                                                                                 | C4                                                                                                                                                                                                                                                                                                                                                                                                                                                                                                                                                                                                                                                                                                                                                                                                                                                                                                                                                                                                                                                                                                                                                                                                                                                                                                                                                                                                                                                                                                                                                                                                                                                                                                                                                                                                                                                                                                                                                                                                                                                                                                                                                                                                                                                                                                                                                                                                                                                                                                                                                                                                                                                                                                                                                                                                                                                                                                                                                                                                                                                                                                                 | 2.9776569  | 1.7101927  | 0.9791483  |            |            |     |    |            |           |            |     |    |           |           |            |     |    |            |           |            |     |    |           |           |            |     |    |           |           |            |     |    |            |            |            |     |    |           |            |            |     |    |            |           |            |      |    |           |           |            |      |     |           |            |            |      |    |           |           |            |      |    |           |            |            |      |     |           |            |            |      |     |            |            |            |      |    |           |            |            |      |    |           |            |            |      |    |           |            |            |      |    |            |            |            |      |     |            |            |            |      |     |            |            |            |      |     |            |            |            |      |    |            |            |           |      |     |           |            |           |      |    |            |            |           |      |     |            |            |           |      |     |            |            |            |      |    |            |            |           |      |     |            |           |           |      |     |            |            |           |      |     |            |           |            |      |     |            |            |           |      |     |            |           |           |
| 10 H                                                                                | H9                                                                                                                                                                                                                                                                                                                                                                                                                                                                                                                                                                                                                                                                                                                                                                                                                                                                                                                                                                                                                                                                                                                                                                                                                                                                                                                                                                                                                                                                                                                                                                                                                                                                                                                                                                                                                                                                                                                                                                                                                                                                                                                                                                                                                                                                                                                                                                                                                                                                                                                                                                                                                                                                                                                                                                                                                                                                                                                                                                                                                                                                                                                 | 2.3542195  | 2.4053323  | 1.5572341  |            |            |     |    |            |           |            |     |    |           |           |            |     |    |            |           |            |     |    |           |           |            |     |    |           |           |            |     |    |            |            |            |     |    |           |            |            |     |    |            |           |            |      |    |           |           |            |      |     |           |            |            |      |    |           |           |            |      |    |           |            |            |      |     |           |            |            |      |     |            |            |            |      |    |           |            |            |      |    |           |            |            |      |    |           |            |            |      |    |            |            |            |      |     |            |            |            |      |     |            |            |            |      |     |            |            |            |      |    |            |            |           |      |     |           |            |           |      |    |            |            |           |      |     |            |            |           |      |     |            |            |            |      |    |            |            |           |      |     |            |           |           |      |     |            |            |           |      |     |            |           |            |      |     |            |            |           |      |     |            |           |           |
| 11 H                                                                                | H10                                                                                                                                                                                                                                                                                                                                                                                                                                                                                                                                                                                                                                                                                                                                                                                                                                                                                                                                                                                                                                                                                                                                                                                                                                                                                                                                                                                                                                                                                                                                                                                                                                                                                                                                                                                                                                                                                                                                                                                                                                                                                                                                                                                                                                                                                                                                                                                                                                                                                                                                                                                                                                                                                                                                                                                                                                                                                                                                                                                                                                                                                                                | 3.2837900  | 2.2488143  | 0.0725951  |            |            |     |    |            |           |            |     |    |           |           |            |     |    |            |           |            |     |    |           |           |            |     |    |           |           |            |     |    |            |            |            |     |    |           |            |            |     |    |            |           |            |      |    |           |           |            |      |     |           |            |            |      |    |           |           |            |      |    |           |            |            |      |     |           |            |            |      |     |            |            |            |      |    |           |            |            |      |    |           |            |            |      |    |           |            |            |      |    |            |            |            |      |     |            |            |            |      |     |            |            |            |      |     |            |            |            |      |    |            |            |           |      |     |           |            |           |      |    |            |            |           |      |     |            |            |           |      |     |            |            |            |      |    |            |            |           |      |     |            |           |           |      |     |            |            |           |      |     |            |           |            |      |     |            |            |           |      |     |            |           |           |
| 12 C                                                                                | C5                                                                                                                                                                                                                                                                                                                                                                                                                                                                                                                                                                                                                                                                                                                                                                                                                                                                                                                                                                                                                                                                                                                                                                                                                                                                                                                                                                                                                                                                                                                                                                                                                                                                                                                                                                                                                                                                                                                                                                                                                                                                                                                                                                                                                                                                                                                                                                                                                                                                                                                                                                                                                                                                                                                                                                                                                                                                                                                                                                                                                                                                                                                 | 4.2138297  | 1.3308953  | 1.7927602  |            |            |     |    |            |           |            |     |    |           |           |            |     |    |            |           |            |     |    |           |           |            |     |    |           |           |            |     |    |            |            |            |     |    |           |            |            |     |    |            |           |            |      |    |           |           |            |      |     |           |            |            |      |    |           |           |            |      |    |           |            |            |      |     |           |            |            |      |     |            |            |            |      |    |           |            |            |      |    |           |            |            |      |    |           |            |            |      |    |            |            |            |      |     |            |            |            |      |     |            |            |            |      |     |            |            |            |      |    |            |            |           |      |     |           |            |           |      |    |            |            |           |      |     |            |            |           |      |     |            |            |            |      |    |            |            |           |      |     |            |           |           |      |     |            |            |           |      |     |            |           |            |      |     |            |            |           |      |     |            |           |           |
| 13 H                                                                                | H7                                                                                                                                                                                                                                                                                                                                                                                                                                                                                                                                                                                                                                                                                                                                                                                                                                                                                                                                                                                                                                                                                                                                                                                                                                                                                                                                                                                                                                                                                                                                                                                                                                                                                                                                                                                                                                                                                                                                                                                                                                                                                                                                                                                                                                                                                                                                                                                                                                                                                                                                                                                                                                                                                                                                                                                                                                                                                                                                                                                                                                                                                                                 | 3.9308807  | 0.8151995  | 2.7178767  |            |            |     |    |            |           |            |     |    |           |           |            |     |    |            |           |            |     |    |           |           |            |     |    |           |           |            |     |    |            |            |            |     |    |           |            |            |     |    |            |           |            |      |    |           |           |            |      |     |           |            |            |      |    |           |           |            |      |    |           |            |            |      |     |           |            |            |      |     |            |            |            |      |    |           |            |            |      |    |           |            |            |      |    |           |            |            |      |    |            |            |            |      |     |            |            |            |      |     |            |            |            |      |     |            |            |            |      |    |            |            |           |      |     |           |            |           |      |    |            |            |           |      |     |            |            |           |      |     |            |            |            |      |    |            |            |           |      |     |            |           |           |      |     |            |            |           |      |     |            |           |            |      |     |            |            |           |      |     |            |           |           |
| 14 H                                                                                | H11                                                                                                                                                                                                                                                                                                                                                                                                                                                                                                                                                                                                                                                                                                                                                                                                                                                                                                                                                                                                                                                                                                                                                                                                                                                                                                                                                                                                                                                                                                                                                                                                                                                                                                                                                                                                                                                                                                                                                                                                                                                                                                                                                                                                                                                                                                                                                                                                                                                                                                                                                                                                                                                                                                                                                                                                                                                                                                                                                                                                                                                                                                                | 4.7985207  | 2.2157419  | 2.0656364  |            |            |     |    |            |           |            |     |    |           |           |            |     |    |            |           |            |     |    |           |           |            |     |    |           |           |            |     |    |            |            |            |     |    |           |            |            |     |    |            |           |            |      |    |           |           |            |      |     |           |            |            |      |    |           |           |            |      |    |           |            |            |      |     |           |            |            |      |     |            |            |            |      |    |           |            |            |      |    |           |            |            |      |    |           |            |            |      |    |            |            |            |      |     |            |            |            |      |     |            |            |            |      |     |            |            |            |      |    |            |            |           |      |     |           |            |           |      |    |            |            |           |      |     |            |            |           |      |     |            |            |            |      |    |            |            |           |      |     |            |           |           |      |     |            |            |           |      |     |            |           |            |      |     |            |            |           |      |     |            |           |           |
| 15 H                                                                                | H12                                                                                                                                                                                                                                                                                                                                                                                                                                                                                                                                                                                                                                                                                                                                                                                                                                                                                                                                                                                                                                                                                                                                                                                                                                                                                                                                                                                                                                                                                                                                                                                                                                                                                                                                                                                                                                                                                                                                                                                                                                                                                                                                                                                                                                                                                                                                                                                                                                                                                                                                                                                                                                                                                                                                                                                                                                                                                                                                                                                                                                                                                                                | 4.8654122  | 0.6588881  | 1.2222077  |            |            |     |    |            |           |            |     |    |           |           |            |     |    |            |           |            |     |    |           |           |            |     |    |           |           |            |     |    |            |            |            |     |    |           |            |            |     |    |            |           |            |      |    |           |           |            |      |     |           |            |            |      |    |           |           |            |      |    |           |            |            |      |     |           |            |            |      |     |            |            |            |      |    |           |            |            |      |    |           |            |            |      |    |           |            |            |      |    |            |            |            |      |     |            |            |            |      |     |            |            |            |      |     |            |            |            |      |    |            |            |           |      |     |           |            |           |      |    |            |            |           |      |     |            |            |           |      |     |            |            |            |      |    |            |            |           |      |     |            |           |           |      |     |            |            |           |      |     |            |           |            |      |     |            |            |           |      |     |            |           |           |
| 16 O                                                                                | O1                                                                                                                                                                                                                                                                                                                                                                                                                                                                                                                                                                                                                                                                                                                                                                                                                                                                                                                                                                                                                                                                                                                                                                                                                                                                                                                                                                                                                                                                                                                                                                                                                                                                                                                                                                                                                                                                                                                                                                                                                                                                                                                                                                                                                                                                                                                                                                                                                                                                                                                                                                                                                                                                                                                                                                                                                                                                                                                                                                                                                                                                                                                 | 0.8953951  | -1.0574631 | -1.6096387 |            |            |     |    |            |           |            |     |    |           |           |            |     |    |            |           |            |     |    |           |           |            |     |    |           |           |            |     |    |            |            |            |     |    |           |            |            |     |    |            |           |            |      |    |           |           |            |      |     |           |            |            |      |    |           |           |            |      |    |           |            |            |      |     |           |            |            |      |     |            |            |            |      |    |           |            |            |      |    |           |            |            |      |    |           |            |            |      |    |            |            |            |      |     |            |            |            |      |     |            |            |            |      |     |            |            |            |      |    |            |            |           |      |     |           |            |           |      |    |            |            |           |      |     |            |            |           |      |     |            |            |            |      |    |            |            |           |      |     |            |           |           |      |     |            |            |           |      |     |            |           |            |      |     |            |            |           |      |     |            |           |           |
| 17 C                                                                                | C6                                                                                                                                                                                                                                                                                                                                                                                                                                                                                                                                                                                                                                                                                                                                                                                                                                                                                                                                                                                                                                                                                                                                                                                                                                                                                                                                                                                                                                                                                                                                                                                                                                                                                                                                                                                                                                                                                                                                                                                                                                                                                                                                                                                                                                                                                                                                                                                                                                                                                                                                                                                                                                                                                                                                                                                                                                                                                                                                                                                                                                                                                                                 | 0.3903927  | -1.8423899 | -2.5854715 |            |            |     |    |            |           |            |     |    |           |           |            |     |    |            |           |            |     |    |           |           |            |     |    |           |           |            |     |    |            |            |            |     |    |           |            |            |     |    |            |           |            |      |    |           |           |            |      |     |           |            |            |      |    |           |           |            |      |    |           |            |            |      |     |           |            |            |      |     |            |            |            |      |    |           |            |            |      |    |           |            |            |      |    |           |            |            |      |    |            |            |            |      |     |            |            |            |      |     |            |            |            |      |     |            |            |            |      |    |            |            |           |      |     |           |            |           |      |    |            |            |           |      |     |            |            |           |      |     |            |            |            |      |    |            |            |           |      |     |            |           |           |      |     |            |            |           |      |     |            |           |            |      |     |            |            |           |      |     |            |           |           |
| 18 O                                                                                | O2                                                                                                                                                                                                                                                                                                                                                                                                                                                                                                                                                                                                                                                                                                                                                                                                                                                                                                                                                                                                                                                                                                                                                                                                                                                                                                                                                                                                                                                                                                                                                                                                                                                                                                                                                                                                                                                                                                                                                                                                                                                                                                                                                                                                                                                                                                                                                                                                                                                                                                                                                                                                                                                                                                                                                                                                                                                                                                                                                                                                                                                                                                                 | 1.1707055  | -2.5185937 | -3.2157957 |            |            |     |    |            |           |            |     |    |           |           |            |     |    |            |           |            |     |    |           |           |            |     |    |           |           |            |     |    |            |            |            |     |    |           |            |            |     |    |            |           |            |      |    |           |           |            |      |     |           |            |            |      |    |           |           |            |      |    |           |            |            |      |     |           |            |            |      |     |            |            |            |      |    |           |            |            |      |    |           |            |            |      |    |           |            |            |      |    |            |            |            |      |     |            |            |            |      |     |            |            |            |      |     |            |            |            |      |    |            |            |           |      |     |           |            |           |      |    |            |            |           |      |     |            |            |           |      |     |            |            |            |      |    |            |            |           |      |     |            |           |           |      |     |            |            |           |      |     |            |           |            |      |     |            |            |           |      |     |            |           |           |
| 19 C                                                                                | C7                                                                                                                                                                                                                                                                                                                                                                                                                                                                                                                                                                                                                                                                                                                                                                                                                                                                                                                                                                                                                                                                                                                                                                                                                                                                                                                                                                                                                                                                                                                                                                                                                                                                                                                                                                                                                                                                                                                                                                                                                                                                                                                                                                                                                                                                                                                                                                                                                                                                                                                                                                                                                                                                                                                                                                                                                                                                                                                                                                                                                                                                                                                 | -1.0903599 | -1.8037915 | -2.8601831 |            |            |     |    |            |           |            |     |    |           |           |            |     |    |            |           |            |     |    |           |           |            |     |    |           |           |            |     |    |            |            |            |     |    |           |            |            |     |    |            |           |            |      |    |           |           |            |      |     |           |            |            |      |    |           |           |            |      |    |           |            |            |      |     |           |            |            |      |     |            |            |            |      |    |           |            |            |      |    |           |            |            |      |    |           |            |            |      |    |            |            |            |      |     |            |            |            |      |     |            |            |            |      |     |            |            |            |      |    |            |            |           |      |     |           |            |           |      |    |            |            |           |      |     |            |            |           |      |     |            |            |            |      |    |            |            |           |      |     |            |           |           |      |     |            |            |           |      |     |            |           |            |      |     |            |            |           |      |     |            |           |           |
| 20 H                                                                                | H1                                                                                                                                                                                                                                                                                                                                                                                                                                                                                                                                                                                                                                                                                                                                                                                                                                                                                                                                                                                                                                                                                                                                                                                                                                                                                                                                                                                                                                                                                                                                                                                                                                                                                                                                                                                                                                                                                                                                                                                                                                                                                                                                                                                                                                                                                                                                                                                                                                                                                                                                                                                                                                                                                                                                                                                                                                                                                                                                                                                                                                                                                                                 | -1.6851073 | -1.9781012 | -1.9601215 |            |            |     |    |            |           |            |     |    |           |           |            |     |    |            |           |            |     |    |           |           |            |     |    |           |           |            |     |    |            |            |            |     |    |           |            |            |     |    |            |           |            |      |    |           |           |            |      |     |           |            |            |      |    |           |           |            |      |    |           |            |            |      |     |           |            |            |      |     |            |            |            |      |    |           |            |            |      |    |           |            |            |      |    |           |            |            |      |    |            |            |            |      |     |            |            |            |      |     |            |            |            |      |     |            |            |            |      |    |            |            |           |      |     |           |            |           |      |    |            |            |           |      |     |            |            |           |      |     |            |            |            |      |    |            |            |           |      |     |            |           |           |      |     |            |            |           |      |     |            |           |            |      |     |            |            |           |      |     |            |           |           |
| 21 H                                                                                | H13                                                                                                                                                                                                                                                                                                                                                                                                                                                                                                                                                                                                                                                                                                                                                                                                                                                                                                                                                                                                                                                                                                                                                                                                                                                                                                                                                                                                                                                                                                                                                                                                                                                                                                                                                                                                                                                                                                                                                                                                                                                                                                                                                                                                                                                                                                                                                                                                                                                                                                                                                                                                                                                                                                                                                                                                                                                                                                                                                                                                                                                                                                                | -1.3160321 | -2.5652016 | -3.6062167 |            |            |     |    |            |           |            |     |    |           |           |            |     |    |            |           |            |     |    |           |           |            |     |    |           |           |            |     |    |            |            |            |     |    |           |            |            |     |    |            |           |            |      |    |           |           |            |      |     |           |            |            |      |    |           |           |            |      |    |           |            |            |      |     |           |            |            |      |     |            |            |            |      |    |           |            |            |      |    |           |            |            |      |    |           |            |            |      |    |            |            |            |      |     |            |            |            |      |     |            |            |            |      |     |            |            |            |      |    |            |            |           |      |     |           |            |           |      |    |            |            |           |      |     |            |            |           |      |     |            |            |            |      |    |            |            |           |      |     |            |           |           |      |     |            |            |           |      |     |            |           |            |      |     |            |            |           |      |     |            |           |           |
| 22 H                                                                                | H14                                                                                                                                                                                                                                                                                                                                                                                                                                                                                                                                                                                                                                                                                                                                                                                                                                                                                                                                                                                                                                                                                                                                                                                                                                                                                                                                                                                                                                                                                                                                                                                                                                                                                                                                                                                                                                                                                                                                                                                                                                                                                                                                                                                                                                                                                                                                                                                                                                                                                                                                                                                                                                                                                                                                                                                                                                                                                                                                                                                                                                                                                                                | -1.3719720 | -0.8220467 | -3.2561781 |            |            |     |    |            |           |            |     |    |           |           |            |     |    |            |           |            |     |    |           |           |            |     |    |           |           |            |     |    |            |            |            |     |    |           |            |            |     |    |            |           |            |      |    |           |           |            |      |     |           |            |            |      |    |           |           |            |      |    |           |            |            |      |     |           |            |            |      |     |            |            |            |      |    |           |            |            |      |    |           |            |            |      |    |           |            |            |      |    |            |            |            |      |     |            |            |            |      |     |            |            |            |      |     |            |            |            |      |    |            |            |           |      |     |           |            |           |      |    |            |            |           |      |     |            |            |           |      |     |            |            |            |      |    |            |            |           |      |     |            |           |           |      |     |            |            |           |      |     |            |           |            |      |     |            |            |           |      |     |            |           |           |
| 23 C                                                                                | C8                                                                                                                                                                                                                                                                                                                                                                                                                                                                                                                                                                                                                                                                                                                                                                                                                                                                                                                                                                                                                                                                                                                                                                                                                                                                                                                                                                                                                                                                                                                                                                                                                                                                                                                                                                                                                                                                                                                                                                                                                                                                                                                                                                                                                                                                                                                                                                                                                                                                                                                                                                                                                                                                                                                                                                                                                                                                                                                                                                                                                                                                                                                 | -0.4244438 | -1.1879020 | 0.3931041  |            |            |     |    |            |           |            |     |    |           |           |            |     |    |            |           |            |     |    |           |           |            |     |    |           |           |            |     |    |            |            |            |     |    |           |            |            |     |    |            |           |            |      |    |           |           |            |      |     |           |            |            |      |    |           |           |            |      |    |           |            |            |      |     |           |            |            |      |     |            |            |            |      |    |           |            |            |      |    |           |            |            |      |    |           |            |            |      |    |            |            |            |      |     |            |            |            |      |     |            |            |            |      |     |            |            |            |      |    |            |            |           |      |     |           |            |           |      |    |            |            |           |      |     |            |            |           |      |     |            |            |            |      |    |            |            |           |      |     |            |           |           |      |     |            |            |           |      |     |            |           |            |      |     |            |            |           |      |     |            |           |           |
| 24 H                                                                                | H15                                                                                                                                                                                                                                                                                                                                                                                                                                                                                                                                                                                                                                                                                                                                                                                                                                                                                                                                                                                                                                                                                                                                                                                                                                                                                                                                                                                                                                                                                                                                                                                                                                                                                                                                                                                                                                                                                                                                                                                                                                                                                                                                                                                                                                                                                                                                                                                                                                                                                                                                                                                                                                                                                                                                                                                                                                                                                                                                                                                                                                                                                                                | 0.3257319  | -1.8477161 | 0.8295784  |            |            |     |    |            |           |            |     |    |           |           |            |     |    |            |           |            |     |    |           |           |            |     |    |           |           |            |     |    |            |            |            |     |    |           |            |            |     |    |            |           |            |      |    |           |           |            |      |     |           |            |            |      |    |           |           |            |      |    |           |            |            |      |     |           |            |            |      |     |            |            |            |      |    |           |            |            |      |    |           |            |            |      |    |           |            |            |      |    |            |            |            |      |     |            |            |            |      |     |            |            |            |      |     |            |            |            |      |    |            |            |           |      |     |           |            |           |      |    |            |            |           |      |     |            |            |           |      |     |            |            |            |      |    |            |            |           |      |     |            |           |           |      |     |            |            |           |      |     |            |           |            |      |     |            |            |           |      |     |            |           |           |
| 25 C                                                                                | C9                                                                                                                                                                                                                                                                                                                                                                                                                                                                                                                                                                                                                                                                                                                                                                                                                                                                                                                                                                                                                                                                                                                                                                                                                                                                                                                                                                                                                                                                                                                                                                                                                                                                                                                                                                                                                                                                                                                                                                                                                                                                                                                                                                                                                                                                                                                                                                                                                                                                                                                                                                                                                                                                                                                                                                                                                                                                                                                                                                                                                                                                                                                 | -1.6497170 | -1.1713932 | 0.8544154  |            |            |     |    |            |           |            |     |    |           |           |            |     |    |            |           |            |     |    |           |           |            |     |    |           |           |            |     |    |            |            |            |     |    |           |            |            |     |    |            |           |            |      |    |           |           |            |      |     |           |            |            |      |    |           |           |            |      |    |           |            |            |      |     |           |            |            |      |     |            |            |            |      |    |           |            |            |      |    |           |            |            |      |    |           |            |            |      |    |            |            |            |      |     |            |            |            |      |     |            |            |            |      |     |            |            |            |      |    |            |            |           |      |     |           |            |           |      |    |            |            |           |      |     |            |            |           |      |     |            |            |            |      |    |            |            |           |      |     |            |           |           |      |     |            |            |           |      |     |            |           |            |      |     |            |            |           |      |     |            |           |           |
| 26 C                                                                                | C10                                                                                                                                                                                                                                                                                                                                                                                                                                                                                                                                                                                                                                                                                                                                                                                                                                                                                                                                                                                                                                                                                                                                                                                                                                                                                                                                                                                                                                                                                                                                                                                                                                                                                                                                                                                                                                                                                                                                                                                                                                                                                                                                                                                                                                                                                                                                                                                                                                                                                                                                                                                                                                                                                                                                                                                                                                                                                                                                                                                                                                                                                                                | -2.9439190 | -0.5718993 | 0.5724538  |            |            |     |    |            |           |            |     |    |           |           |            |     |    |            |           |            |     |    |           |           |            |     |    |           |           |            |     |    |            |            |            |     |    |           |            |            |     |    |            |           |            |      |    |           |           |            |      |     |           |            |            |      |    |           |           |            |      |    |           |            |            |      |     |           |            |            |      |     |            |            |            |      |    |           |            |            |      |    |           |            |            |      |    |           |            |            |      |    |            |            |            |      |     |            |            |            |      |     |            |            |            |      |     |            |            |            |      |    |            |            |           |      |     |           |            |           |      |    |            |            |           |      |     |            |            |           |      |     |            |            |            |      |    |            |            |           |      |     |            |           |           |      |     |            |            |           |      |     |            |           |            |      |     |            |            |           |      |     |            |           |           |
| 27 O                                                                                | O3                                                                                                                                                                                                                                                                                                                                                                                                                                                                                                                                                                                                                                                                                                                                                                                                                                                                                                                                                                                                                                                                                                                                                                                                                                                                                                                                                                                                                                                                                                                                                                                                                                                                                                                                                                                                                                                                                                                                                                                                                                                                                                                                                                                                                                                                                                                                                                                                                                                                                                                                                                                                                                                                                                                                                                                                                                                                                                                                                                                                                                                                                                                 | -3.4574197 | -0.5813495 | -0.5322841 |            |            |     |    |            |           |            |     |    |           |           |            |     |    |            |           |            |     |    |           |           |            |     |    |           |           |            |     |    |            |            |            |     |    |           |            |            |     |    |            |           |            |      |    |           |           |            |      |     |           |            |            |      |    |           |           |            |      |    |           |            |            |      |     |           |            |            |      |     |            |            |            |      |    |           |            |            |      |    |           |            |            |      |    |           |            |            |      |    |            |            |            |      |     |            |            |            |      |     |            |            |            |      |     |            |            |            |      |    |            |            |           |      |     |           |            |           |      |    |            |            |           |      |     |            |            |           |      |     |            |            |            |      |    |            |            |           |      |     |            |           |           |      |     |            |            |           |      |     |            |           |            |      |     |            |            |           |      |     |            |           |           |
| 28 O                                                                                | O4                                                                                                                                                                                                                                                                                                                                                                                                                                                                                                                                                                                                                                                                                                                                                                                                                                                                                                                                                                                                                                                                                                                                                                                                                                                                                                                                                                                                                                                                                                                                                                                                                                                                                                                                                                                                                                                                                                                                                                                                                                                                                                                                                                                                                                                                                                                                                                                                                                                                                                                                                                                                                                                                                                                                                                                                                                                                                                                                                                                                                                                                                                                 | -3.5041429 | -0.0493025 | 1.6617359  |            |            |     |    |            |           |            |     |    |           |           |            |     |    |            |           |            |     |    |           |           |            |     |    |           |           |            |     |    |            |            |            |     |    |           |            |            |     |    |            |           |            |      |    |           |           |            |      |     |           |            |            |      |    |           |           |            |      |    |           |            |            |      |     |           |            |            |      |     |            |            |            |      |    |           |            |            |      |    |           |            |            |      |    |           |            |            |      |    |            |            |            |      |     |            |            |            |      |     |            |            |            |      |     |            |            |            |      |    |            |            |           |      |     |           |            |           |      |    |            |            |           |      |     |            |            |           |      |     |            |            |            |      |    |            |            |           |      |     |            |           |           |      |     |            |            |           |      |     |            |           |            |      |     |            |            |           |      |     |            |           |           |
| 29 C                                                                                | C11                                                                                                                                                                                                                                                                                                                                                                                                                                                                                                                                                                                                                                                                                                                                                                                                                                                                                                                                                                                                                                                                                                                                                                                                                                                                                                                                                                                                                                                                                                                                                                                                                                                                                                                                                                                                                                                                                                                                                                                                                                                                                                                                                                                                                                                                                                                                                                                                                                                                                                                                                                                                                                                                                                                                                                                                                                                                                                                                                                                                                                                                                                                | -4.7935960 | 0.5524270  | 1.4737172  |            |            |     |    |            |           |            |     |    |           |           |            |     |    |            |           |            |     |    |           |           |            |     |    |           |           |            |     |    |            |            |            |     |    |           |            |            |     |    |            |           |            |      |    |           |           |            |      |     |           |            |            |      |    |           |           |            |      |    |           |            |            |      |     |           |            |            |      |     |            |            |            |      |    |           |            |            |      |    |           |            |            |      |    |           |            |            |      |    |            |            |            |      |     |            |            |            |      |     |            |            |            |      |     |            |            |            |      |    |            |            |           |      |     |           |            |           |      |    |            |            |           |      |     |            |            |           |      |     |            |            |            |      |    |            |            |           |      |     |            |           |           |      |     |            |            |           |      |     |            |           |            |      |     |            |            |           |      |     |            |           |           |
| 30 H                                                                                | H2                                                                                                                                                                                                                                                                                                                                                                                                                                                                                                                                                                                                                                                                                                                                                                                                                                                                                                                                                                                                                                                                                                                                                                                                                                                                                                                                                                                                                                                                                                                                                                                                                                                                                                                                                                                                                                                                                                                                                                                                                                                                                                                                                                                                                                                                                                                                                                                                                                                                                                                                                                                                                                                                                                                                                                                                                                                                                                                                                                                                                                                                                                                 | -4.7207030 | 1.3925970  | 0.7797529  |            |            |     |    |            |           |            |     |    |           |           |            |     |    |            |           |            |     |    |           |           |            |     |    |           |           |            |     |    |            |            |            |     |    |           |            |            |     |    |            |           |            |      |    |           |           |            |      |     |           |            |            |      |    |           |           |            |      |    |           |            |            |      |     |           |            |            |      |     |            |            |            |      |    |           |            |            |      |    |           |            |            |      |    |           |            |            |      |    |            |            |            |      |     |            |            |            |      |     |            |            |            |      |     |            |            |            |      |    |            |            |           |      |     |           |            |           |      |    |            |            |           |      |     |            |            |           |      |     |            |            |            |      |    |            |            |           |      |     |            |           |           |      |     |            |            |           |      |     |            |           |            |      |     |            |            |           |      |     |            |           |           |
| 31 H                                                                                | H16                                                                                                                                                                                                                                                                                                                                                                                                                                                                                                                                                                                                                                                                                                                                                                                                                                                                                                                                                                                                                                                                                                                                                                                                                                                                                                                                                                                                                                                                                                                                                                                                                                                                                                                                                                                                                                                                                                                                                                                                                                                                                                                                                                                                                                                                                                                                                                                                                                                                                                                                                                                                                                                                                                                                                                                                                                                                                                                                                                                                                                                                                                                | -5.0983772 | 0.8970765  | 2.4602198  |            |            |     |    |            |           |            |     |    |           |           |            |     |    |            |           |            |     |    |           |           |            |     |    |           |           |            |     |    |            |            |            |     |    |           |            |            |     |    |            |           |            |      |    |           |           |            |      |     |           |            |            |      |    |           |           |            |      |    |           |            |            |      |     |           |            |            |      |     |            |            |            |      |    |           |            |            |      |    |           |            |            |      |    |           |            |            |      |    |            |            |            |      |     |            |            |            |      |     |            |            |            |      |     |            |            |            |      |    |            |            |           |      |     |           |            |           |      |    |            |            |           |      |     |            |            |           |      |     |            |            |            |      |    |            |            |           |      |     |            |           |           |      |     |            |            |           |      |     |            |           |            |      |     |            |            |           |      |     |            |           |           |
| 32 H                                                                                | H17                                                                                                                                                                                                                                                                                                                                                                                                                                                                                                                                                                                                                                                                                                                                                                                                                                                                                                                                                                                                                                                                                                                                                                                                                                                                                                                                                                                                                                                                                                                                                                                                                                                                                                                                                                                                                                                                                                                                                                                                                                                                                                                                                                                                                                                                                                                                                                                                                                                                                                                                                                                                                                                                                                                                                                                                                                                                                                                                                                                                                                                                                                                | -5.5024109 | -0.1834051 | 1.0877672  |            |            |     |    |            |           |            |     |    |           |           |            |     |    |            |           |            |     |    |           |           |            |     |    |           |           |            |     |    |            |            |            |     |    |           |            |            |     |    |            |           |            |      |    |           |           |            |      |     |           |            |            |      |    |           |           |            |      |    |           |            |            |      |     |           |            |            |      |     |            |            |            |      |    |           |            |            |      |    |           |            |            |      |    |           |            |            |      |    |            |            |            |      |     |            |            |            |      |     |            |            |            |      |     |            |            |            |      |    |            |            |           |      |     |           |            |           |      |    |            |            |           |      |     |            |            |           |      |     |            |            |            |      |    |            |            |           |      |     |            |           |           |      |     |            |            |           |      |     |            |           |            |      |     |            |            |           |      |     |            |           |           |
|  | <table border="1"> <tbody> <tr><td>1 H</td><td>H1</td><td>1.5894546</td><td>2.3934859</td><td>-4.3797290</td></tr> <tr><td>2 C</td><td>C1</td><td>1.5047202</td><td>2.5998007</td><td>-3.3047210</td></tr> <tr><td>3 H</td><td>H2</td><td>2.5183236</td><td>2.5150621</td><td>-2.8910451</td></tr> <tr><td>4 C</td><td>C2</td><td>0.9800022</td><td>4.0186758</td><td>-3.0917641</td></tr> <tr><td>5 H</td><td>H4</td><td>1.6374809</td><td>4.7612952</td><td>-3.5557324</td></tr> <tr><td>6 H</td><td>H5</td><td>0.9090806</td><td>4.2518311</td><td>-2.0226910</td></tr> <tr><td>7 H</td><td>H6</td><td>-0.0201160</td><td>4.1357357</td><td>-3.5252690</td></tr> <tr><td>8 C</td><td>C3</td><td>0.6083490</td><td>1.5458528</td><td>-2.6546892</td></tr> <tr><td>9 H</td><td>H7</td><td>-0.4053353</td><td>1.6223965</td><td>-3.0705023</td></tr> <tr><td>10 H</td><td>H8</td><td>0.5218580</td><td>1.7633347</td><td>-1.5817447</td></tr> <tr><td>11 C</td><td>C4</td><td>1.1368090</td><td>0.1260516</td><td>-2.8525459</td></tr> </tbody> </table>                                                                                                                                                                                                                                                                                                                                                                                                                                                                                                                                                                                                                                                                                                                                                                                                                                                                                                                                                                                                                                                                                                                                                                                                                                                                                                                                                                                                                                                                                                                                                                                                                                                                                                                                                                                                                                                                                                                                                                                                                                                           | 1 H        | H1         | 1.5894546  | 2.3934859  | -4.3797290 | 2 C | C1 | 1.5047202  | 2.5998007 | -3.3047210 | 3 H | H2 | 2.5183236 | 2.5150621 | -2.8910451 | 4 C | C2 | 0.9800022  | 4.0186758 | -3.0917641 | 5 H | H4 | 1.6374809 | 4.7612952 | -3.5557324 | 6 H | H5 | 0.9090806 | 4.2518311 | -2.0226910 | 7 H | H6 | -0.0201160 | 4.1357357  | -3.5252690 | 8 C | C3 | 0.6083490 | 1.5458528  | -2.6546892 | 9 H | H7 | -0.4053353 | 1.6223965 | -3.0705023 | 10 H | H8 | 0.5218580 | 1.7633347 | -1.5817447 | 11 C | C4  | 1.1368090 | 0.1260516  | -2.8525459 |      |    |           |           |            |      |    |           |            |            |      |     |           |            |            |      |     |            |            |            |      |    |           |            |            |      |    |           |            |            |      |    |           |            |            |      |    |            |            |            |      |     |            |            |            |      |     |            |            |            |      |     |            |            |            |      |    |            |            |           |      |     |           |            |           |      |    |            |            |           |      |     |            |            |           |      |     |            |            |            |      |    |            |            |           |      |     |            |           |           |      |     |            |            |           |      |     |            |           |            |      |     |            |            |           |      |     |            |           |           |
| 1 H                                                                                 | H1                                                                                                                                                                                                                                                                                                                                                                                                                                                                                                                                                                                                                                                                                                                                                                                                                                                                                                                                                                                                                                                                                                                                                                                                                                                                                                                                                                                                                                                                                                                                                                                                                                                                                                                                                                                                                                                                                                                                                                                                                                                                                                                                                                                                                                                                                                                                                                                                                                                                                                                                                                                                                                                                                                                                                                                                                                                                                                                                                                                                                                                                                                                 | 1.5894546  | 2.3934859  | -4.3797290 |            |            |     |    |            |           |            |     |    |           |           |            |     |    |            |           |            |     |    |           |           |            |     |    |           |           |            |     |    |            |            |            |     |    |           |            |            |     |    |            |           |            |      |    |           |           |            |      |     |           |            |            |      |    |           |           |            |      |    |           |            |            |      |     |           |            |            |      |     |            |            |            |      |    |           |            |            |      |    |           |            |            |      |    |           |            |            |      |    |            |            |            |      |     |            |            |            |      |     |            |            |            |      |     |            |            |            |      |    |            |            |           |      |     |           |            |           |      |    |            |            |           |      |     |            |            |           |      |     |            |            |            |      |    |            |            |           |      |     |            |           |           |      |     |            |            |           |      |     |            |           |            |      |     |            |            |           |      |     |            |           |           |
| 2 C                                                                                 | C1                                                                                                                                                                                                                                                                                                                                                                                                                                                                                                                                                                                                                                                                                                                                                                                                                                                                                                                                                                                                                                                                                                                                                                                                                                                                                                                                                                                                                                                                                                                                                                                                                                                                                                                                                                                                                                                                                                                                                                                                                                                                                                                                                                                                                                                                                                                                                                                                                                                                                                                                                                                                                                                                                                                                                                                                                                                                                                                                                                                                                                                                                                                 | 1.5047202  | 2.5998007  | -3.3047210 |            |            |     |    |            |           |            |     |    |           |           |            |     |    |            |           |            |     |    |           |           |            |     |    |           |           |            |     |    |            |            |            |     |    |           |            |            |     |    |            |           |            |      |    |           |           |            |      |     |           |            |            |      |    |           |           |            |      |    |           |            |            |      |     |           |            |            |      |     |            |            |            |      |    |           |            |            |      |    |           |            |            |      |    |           |            |            |      |    |            |            |            |      |     |            |            |            |      |     |            |            |            |      |     |            |            |            |      |    |            |            |           |      |     |           |            |           |      |    |            |            |           |      |     |            |            |           |      |     |            |            |            |      |    |            |            |           |      |     |            |           |           |      |     |            |            |           |      |     |            |           |            |      |     |            |            |           |      |     |            |           |           |
| 3 H                                                                                 | H2                                                                                                                                                                                                                                                                                                                                                                                                                                                                                                                                                                                                                                                                                                                                                                                                                                                                                                                                                                                                                                                                                                                                                                                                                                                                                                                                                                                                                                                                                                                                                                                                                                                                                                                                                                                                                                                                                                                                                                                                                                                                                                                                                                                                                                                                                                                                                                                                                                                                                                                                                                                                                                                                                                                                                                                                                                                                                                                                                                                                                                                                                                                 | 2.5183236  | 2.5150621  | -2.8910451 |            |            |     |    |            |           |            |     |    |           |           |            |     |    |            |           |            |     |    |           |           |            |     |    |           |           |            |     |    |            |            |            |     |    |           |            |            |     |    |            |           |            |      |    |           |           |            |      |     |           |            |            |      |    |           |           |            |      |    |           |            |            |      |     |           |            |            |      |     |            |            |            |      |    |           |            |            |      |    |           |            |            |      |    |           |            |            |      |    |            |            |            |      |     |            |            |            |      |     |            |            |            |      |     |            |            |            |      |    |            |            |           |      |     |           |            |           |      |    |            |            |           |      |     |            |            |           |      |     |            |            |            |      |    |            |            |           |      |     |            |           |           |      |     |            |            |           |      |     |            |           |            |      |     |            |            |           |      |     |            |           |           |
| 4 C                                                                                 | C2                                                                                                                                                                                                                                                                                                                                                                                                                                                                                                                                                                                                                                                                                                                                                                                                                                                                                                                                                                                                                                                                                                                                                                                                                                                                                                                                                                                                                                                                                                                                                                                                                                                                                                                                                                                                                                                                                                                                                                                                                                                                                                                                                                                                                                                                                                                                                                                                                                                                                                                                                                                                                                                                                                                                                                                                                                                                                                                                                                                                                                                                                                                 | 0.9800022  | 4.0186758  | -3.0917641 |            |            |     |    |            |           |            |     |    |           |           |            |     |    |            |           |            |     |    |           |           |            |     |    |           |           |            |     |    |            |            |            |     |    |           |            |            |     |    |            |           |            |      |    |           |           |            |      |     |           |            |            |      |    |           |           |            |      |    |           |            |            |      |     |           |            |            |      |     |            |            |            |      |    |           |            |            |      |    |           |            |            |      |    |           |            |            |      |    |            |            |            |      |     |            |            |            |      |     |            |            |            |      |     |            |            |            |      |    |            |            |           |      |     |           |            |           |      |    |            |            |           |      |     |            |            |           |      |     |            |            |            |      |    |            |            |           |      |     |            |           |           |      |     |            |            |           |      |     |            |           |            |      |     |            |            |           |      |     |            |           |           |
| 5 H                                                                                 | H4                                                                                                                                                                                                                                                                                                                                                                                                                                                                                                                                                                                                                                                                                                                                                                                                                                                                                                                                                                                                                                                                                                                                                                                                                                                                                                                                                                                                                                                                                                                                                                                                                                                                                                                                                                                                                                                                                                                                                                                                                                                                                                                                                                                                                                                                                                                                                                                                                                                                                                                                                                                                                                                                                                                                                                                                                                                                                                                                                                                                                                                                                                                 | 1.6374809  | 4.7612952  | -3.5557324 |            |            |     |    |            |           |            |     |    |           |           |            |     |    |            |           |            |     |    |           |           |            |     |    |           |           |            |     |    |            |            |            |     |    |           |            |            |     |    |            |           |            |      |    |           |           |            |      |     |           |            |            |      |    |           |           |            |      |    |           |            |            |      |     |           |            |            |      |     |            |            |            |      |    |           |            |            |      |    |           |            |            |      |    |           |            |            |      |    |            |            |            |      |     |            |            |            |      |     |            |            |            |      |     |            |            |            |      |    |            |            |           |      |     |           |            |           |      |    |            |            |           |      |     |            |            |           |      |     |            |            |            |      |    |            |            |           |      |     |            |           |           |      |     |            |            |           |      |     |            |           |            |      |     |            |            |           |      |     |            |           |           |
| 6 H                                                                                 | H5                                                                                                                                                                                                                                                                                                                                                                                                                                                                                                                                                                                                                                                                                                                                                                                                                                                                                                                                                                                                                                                                                                                                                                                                                                                                                                                                                                                                                                                                                                                                                                                                                                                                                                                                                                                                                                                                                                                                                                                                                                                                                                                                                                                                                                                                                                                                                                                                                                                                                                                                                                                                                                                                                                                                                                                                                                                                                                                                                                                                                                                                                                                 | 0.9090806  | 4.2518311  | -2.0226910 |            |            |     |    |            |           |            |     |    |           |           |            |     |    |            |           |            |     |    |           |           |            |     |    |           |           |            |     |    |            |            |            |     |    |           |            |            |     |    |            |           |            |      |    |           |           |            |      |     |           |            |            |      |    |           |           |            |      |    |           |            |            |      |     |           |            |            |      |     |            |            |            |      |    |           |            |            |      |    |           |            |            |      |    |           |            |            |      |    |            |            |            |      |     |            |            |            |      |     |            |            |            |      |     |            |            |            |      |    |            |            |           |      |     |           |            |           |      |    |            |            |           |      |     |            |            |           |      |     |            |            |            |      |    |            |            |           |      |     |            |           |           |      |     |            |            |           |      |     |            |           |            |      |     |            |            |           |      |     |            |           |           |
| 7 H                                                                                 | H6                                                                                                                                                                                                                                                                                                                                                                                                                                                                                                                                                                                                                                                                                                                                                                                                                                                                                                                                                                                                                                                                                                                                                                                                                                                                                                                                                                                                                                                                                                                                                                                                                                                                                                                                                                                                                                                                                                                                                                                                                                                                                                                                                                                                                                                                                                                                                                                                                                                                                                                                                                                                                                                                                                                                                                                                                                                                                                                                                                                                                                                                                                                 | -0.0201160 | 4.1357357  | -3.5252690 |            |            |     |    |            |           |            |     |    |           |           |            |     |    |            |           |            |     |    |           |           |            |     |    |           |           |            |     |    |            |            |            |     |    |           |            |            |     |    |            |           |            |      |    |           |           |            |      |     |           |            |            |      |    |           |           |            |      |    |           |            |            |      |     |           |            |            |      |     |            |            |            |      |    |           |            |            |      |    |           |            |            |      |    |           |            |            |      |    |            |            |            |      |     |            |            |            |      |     |            |            |            |      |     |            |            |            |      |    |            |            |           |      |     |           |            |           |      |    |            |            |           |      |     |            |            |           |      |     |            |            |            |      |    |            |            |           |      |     |            |           |           |      |     |            |            |           |      |     |            |           |            |      |     |            |            |           |      |     |            |           |           |
| 8 C                                                                                 | C3                                                                                                                                                                                                                                                                                                                                                                                                                                                                                                                                                                                                                                                                                                                                                                                                                                                                                                                                                                                                                                                                                                                                                                                                                                                                                                                                                                                                                                                                                                                                                                                                                                                                                                                                                                                                                                                                                                                                                                                                                                                                                                                                                                                                                                                                                                                                                                                                                                                                                                                                                                                                                                                                                                                                                                                                                                                                                                                                                                                                                                                                                                                 | 0.6083490  | 1.5458528  | -2.6546892 |            |            |     |    |            |           |            |     |    |           |           |            |     |    |            |           |            |     |    |           |           |            |     |    |           |           |            |     |    |            |            |            |     |    |           |            |            |     |    |            |           |            |      |    |           |           |            |      |     |           |            |            |      |    |           |           |            |      |    |           |            |            |      |     |           |            |            |      |     |            |            |            |      |    |           |            |            |      |    |           |            |            |      |    |           |            |            |      |    |            |            |            |      |     |            |            |            |      |     |            |            |            |      |     |            |            |            |      |    |            |            |           |      |     |           |            |           |      |    |            |            |           |      |     |            |            |           |      |     |            |            |            |      |    |            |            |           |      |     |            |           |           |      |     |            |            |           |      |     |            |           |            |      |     |            |            |           |      |     |            |           |           |
| 9 H                                                                                 | H7                                                                                                                                                                                                                                                                                                                                                                                                                                                                                                                                                                                                                                                                                                                                                                                                                                                                                                                                                                                                                                                                                                                                                                                                                                                                                                                                                                                                                                                                                                                                                                                                                                                                                                                                                                                                                                                                                                                                                                                                                                                                                                                                                                                                                                                                                                                                                                                                                                                                                                                                                                                                                                                                                                                                                                                                                                                                                                                                                                                                                                                                                                                 | -0.4053353 | 1.6223965  | -3.0705023 |            |            |     |    |            |           |            |     |    |           |           |            |     |    |            |           |            |     |    |           |           |            |     |    |           |           |            |     |    |            |            |            |     |    |           |            |            |     |    |            |           |            |      |    |           |           |            |      |     |           |            |            |      |    |           |           |            |      |    |           |            |            |      |     |           |            |            |      |     |            |            |            |      |    |           |            |            |      |    |           |            |            |      |    |           |            |            |      |    |            |            |            |      |     |            |            |            |      |     |            |            |            |      |     |            |            |            |      |    |            |            |           |      |     |           |            |           |      |    |            |            |           |      |     |            |            |           |      |     |            |            |            |      |    |            |            |           |      |     |            |           |           |      |     |            |            |           |      |     |            |           |            |      |     |            |            |           |      |     |            |           |           |
| 10 H                                                                                | H8                                                                                                                                                                                                                                                                                                                                                                                                                                                                                                                                                                                                                                                                                                                                                                                                                                                                                                                                                                                                                                                                                                                                                                                                                                                                                                                                                                                                                                                                                                                                                                                                                                                                                                                                                                                                                                                                                                                                                                                                                                                                                                                                                                                                                                                                                                                                                                                                                                                                                                                                                                                                                                                                                                                                                                                                                                                                                                                                                                                                                                                                                                                 | 0.5218580  | 1.7633347  | -1.5817447 |            |            |     |    |            |           |            |     |    |           |           |            |     |    |            |           |            |     |    |           |           |            |     |    |           |           |            |     |    |            |            |            |     |    |           |            |            |     |    |            |           |            |      |    |           |           |            |      |     |           |            |            |      |    |           |           |            |      |    |           |            |            |      |     |           |            |            |      |     |            |            |            |      |    |           |            |            |      |    |           |            |            |      |    |           |            |            |      |    |            |            |            |      |     |            |            |            |      |     |            |            |            |      |     |            |            |            |      |    |            |            |           |      |     |           |            |           |      |    |            |            |           |      |     |            |            |           |      |     |            |            |            |      |    |            |            |           |      |     |            |           |           |      |     |            |            |           |      |     |            |           |            |      |     |            |            |           |      |     |            |           |           |
| 11 C                                                                                | C4                                                                                                                                                                                                                                                                                                                                                                                                                                                                                                                                                                                                                                                                                                                                                                                                                                                                                                                                                                                                                                                                                                                                                                                                                                                                                                                                                                                                                                                                                                                                                                                                                                                                                                                                                                                                                                                                                                                                                                                                                                                                                                                                                                                                                                                                                                                                                                                                                                                                                                                                                                                                                                                                                                                                                                                                                                                                                                                                                                                                                                                                                                                 | 1.1368090  | 0.1260516  | -2.8525459 |            |            |     |    |            |           |            |     |    |           |           |            |     |    |            |           |            |     |    |           |           |            |     |    |           |           |            |     |    |            |            |            |     |    |           |            |            |     |    |            |           |            |      |    |           |           |            |      |     |           |            |            |      |    |           |           |            |      |    |           |            |            |      |     |           |            |            |      |     |            |            |            |      |    |           |            |            |      |    |           |            |            |      |    |           |            |            |      |    |            |            |            |      |     |            |            |            |      |     |            |            |            |      |     |            |            |            |      |    |            |            |           |      |     |           |            |           |      |    |            |            |           |      |     |            |            |           |      |     |            |            |            |      |    |            |            |           |      |     |            |           |           |      |     |            |            |           |      |     |            |           |            |      |     |            |            |           |      |     |            |           |           |

|  |  |           |            |            |            |
|--|--|-----------|------------|------------|------------|
|  |  | 12 H H3   | 2.1566297  | 0.0445130  | -2.4552299 |
|  |  | 13 H H9   | 1.1861428  | -0.1106683 | -3.9219367 |
|  |  | 14 C C5   | 0.2703228  | -0.9434448 | -2.1851925 |
|  |  | 15 H H11  | -0.7475928 | -0.8903918 | -2.5814796 |
|  |  | 16 O O1   | 0.8709957  | -2.2038165 | -2.5475730 |
|  |  | 17 C C6   | 0.2157011  | -3.3765290 | -2.4321346 |
|  |  | 18 O O2   | 0.8248822  | -4.3869802 | -2.7023876 |
|  |  | 19 C C7   | -1.2270558 | -3.3661386 | -1.9972509 |
|  |  | 20 H H10  | -1.3386846 | -2.8933188 | -1.0170541 |
|  |  | 21 H H13  | -1.5767617 | -4.3968127 | -1.9479852 |
|  |  | 22 H H14  | -1.8435854 | -2.8085065 | -2.7093502 |
|  |  | 23 C C8   | 0.2874431  | -0.8047980 | -0.6892740 |
|  |  | 24 H H15  | 1.2373573  | -1.1142332 | -0.2477286 |
|  |  | 25 C C9   | -0.6355523 | -0.3312819 | 0.1509617  |
|  |  | 26 I I1   | -2.5439545 | 0.2995736  | -0.5822467 |
|  |  | 27 Si Si1 | -0.3092460 | -0.1091592 | 2.0111643  |
|  |  | 28 C C10  | 0.4280974  | 1.6072405  | 2.2811401  |
|  |  | 29 H H17  | 1.4321817  | 1.6143383  | 1.8362525  |
|  |  | 30 H H18  | 0.5759667  | 1.7347547  | 3.3625950  |
|  |  | 31 C C11  | -0.3948948 | 2.7771532  | 1.7246955  |
|  |  | 32 H H19  | 0.0687677  | 3.7402944  | 1.9657600  |
|  |  | 33 H H20  | -1.4110131 | 2.7870015  | 2.1355071  |
|  |  | 34 H H21  | -0.4826032 | 2.7165845  | 0.6339452  |
|  |  | 35 C C12  | -1.9103387 | -0.3329284 | 2.9815381  |
|  |  | 36 H H22  | -2.4160033 | -1.2430379 | 2.6333711  |
|  |  | 37 H H23  | -2.5895971 | 0.4979344  | 2.7538902  |
|  |  | 38 C C13  | -1.6770535 | -0.4120352 | 4.4982172  |
|  |  | 39 H H12  | -1.1741811 | 0.4862526  | 4.8747186  |
|  |  | 40 H H24  | -1.0542541 | -1.2741226 | 4.7626486  |
|  |  | 41 H H25  | -2.6238510 | -0.5102881 | 5.0406106  |
|  |  | 42 C C14  | 0.9442155  | -1.4250537 | 2.5208087  |
|  |  | 43 H H16  | 1.8822838  | -1.2741592 | 1.9710359  |
|  |  | 44 H H27  | 1.1886777  | -1.2416040 | 3.5762037  |
|  |  | 45 C C15  | 0.4491660  | -2.8668436 | 2.3429921  |
|  |  | 46 H H26  | 1.1964045  | -3.5924833 | 2.6827454  |
|  |  | 47 H H28  | 0.2291936  | -3.0850540 | 1.2916481  |
|  |  | 48 H H29  | -0.4688334 | -3.0454732 | 2.9148075  |
|  |  | 1 H H1    | -0.5508601 | 2.5551407  | -3.8134349 |
|  |  | 2 C C1    | 0.3376297  | 2.6421814  | -3.1745491 |
|  |  | 3 H H2    | 1.2074741  | 2.5805298  | -3.8416951 |
|  |  | 4 C C2    | 0.3309443  | 3.9940515  | -2.4620821 |
|  |  | 5 H H4    | 0.2853641  | 4.8230036  | -3.1760465 |
|  |  | 6 H H5    | 1.2355258  | 4.1202643  | -1.8556713 |
|  |  | 7 H H6    | -0.5325179 | 4.0774347  | -1.7915121 |
|  |  | 8 C C3    | 0.3713094  | 1.4736528  | -2.1909067 |
|  |  | 9 H H7    | -0.5129949 | 1.5247600  | -1.5392089 |
|  |  | 10 H H8   | 1.2424028  | 1.5812313  | -1.5339015 |
|  |  | 11 C C4   | 0.4235356  | 0.1096431  | -2.8753808 |
|  |  | 12 H H3   | 1.3591490  | 0.0026261  | -3.4382548 |
|  |  | 13 H H9   | -0.3997612 | 0.0159815  | -3.5939993 |
|  |  | 14 C C5   | 0.3041091  | -1.0458265 | -1.8842458 |
|  |  | 15 H H11  | -0.6439575 | -0.9590472 | -1.3465029 |
|  |  | 16 O O1   | 0.3101240  | -2.2493181 | -2.6804238 |
|  |  | 17 C C6   | -0.2294432 | -3.4048333 | -2.2497325 |
|  |  | 18 O O2   | -0.1118472 | -4.3797623 | -2.9584843 |
|  |  | 19 C C7   | -0.9683796 | -3.4204790 | -0.9359192 |
|  |  | 20 H H10  | -0.3413844 | -3.0425263 | -0.1242597 |
|  |  | 21 H H13  | -1.2659327 | -4.4466650 | -0.7219388 |
|  |  | 22 H H14  | -1.8627029 | -2.7908048 | -0.9907168 |
|  |  | 23 C C8   | 1.4633018  | -1.0847392 | -0.9032967 |
|  |  | 24 H H15  | 2.4204252  | -1.3640420 | -1.3571030 |
|  |  | 25 C C9   | 1.3630752  | -0.7604119 | 0.3654711  |
|  |  | 26 Si Si1 | 0.3862003  | -0.2349210 | 1.8455480  |
|  |  | 27 C C10  | 0.9976496  | 1.4453612  | 2.4481582  |
|  |  | 28 H H17  | 2.0741439  | 1.3755713  | 2.6511266  |
|  |  | 29 H H18  | 0.5186802  | 1.6337204  | 3.4192042  |
|  |  | 30 C C11  | 0.7148053  | 2.6140439  | 1.4950000  |
|  |  | 31 H H19  | 1.0604752  | 3.5660647  | 1.9135767  |
|  |  | 32 H H20  | -0.3575029 | 2.7132693  | 1.2901576  |
|  |  | 33 H H21  | 1.2199771  | 2.4735508  | 0.5335996  |
|  |  | 34 C C12  | -1.4413078 | -0.1221792 | 1.3573376  |
|  |  | 35 H H22  | -1.7706116 | -1.0973998 | 0.9756126  |
|  |  | 36 H H23  | -1.5380062 | 0.5817237  | 0.5203732  |
|  |  | 37 C C13  | -2.3420019 | 0.3176358  | 2.5209665  |
|  |  | 38 H H12  | -2.0384366 | 1.2951733  | 2.9133608  |
|  |  | 39 H H24  | -2.2999331 | -0.3983602 | 3.3495921  |
|  |  | 40 H H25  | -3.3892856 | 0.3988215  | 2.2082368  |
|  |  | 41 C C14  | 0.6235990  | -1.5231226 | 3.2040682  |
|  |  | 42 H H16  | 1.6720443  | -1.5028225 | 3.5281196  |
|  |  | 43 H H27  | 0.0317399  | -1.2009616 | 4.0717512  |
|  |  | 44 C C15  | 0.2234819  | -2.9479497 | 2.7998343  |
|  |  | 45 H H26  | 0.3453203  | -3.6528266 | 3.6299226  |
|  |  | 46 H H28  | 0.8381245  | -3.3091299 | 1.9672853  |
|  |  | 47 H H29  | -0.8241822 | -2.9919400 | 2.4796294  |
|  |  | 1 C C1    | 0.8359616  | 0.1449826  | -1.4126097 |
|  |  | 2 H H3    | -0.1344305 | 0.5660648  | -1.6878045 |
|  |  | 3 C C2    | 1.6803630  | 1.2420728  | -0.7595186 |
|  |  | 4 H H5    | 1.0842102  | 1.6961914  | 0.0369875  |
|  |  | 5 H H6    | 1.8426194  | 2.0186937  | -1.5167744 |
|  |  | 6 C C3    | 3.0183552  | 0.7723966  | -0.1907739 |
|  |  | 7 H H4    | 2.8432111  | 0.0134276  | 0.5839475  |
|  |  | 8 H H8    | 3.6069188  | 0.2880840  | -0.9801125 |
|  |  | 9 C C4    | 3.8196852  | 1.9239256  | 0.4162153  |
|  |  | 10 H H9   | 3.2211251  | 2.4014909  | 1.2037461  |
|  |  | 11 H H10  | 3.9910428  | 2.6905142  | -0.3512012 |
|  |  | 12 C C5   | 5.1578707  | 1.4666306  | 0.9938100  |
|  |  | 13 H H7   | 5.0089784  | 0.7195372  | 1.7822691  |
|  |  | 14 H H11  | 5.7132916  | 2.3056458  | 1.4257986  |
|  |  | 15 H H12  | 5.7837212  | 1.0117737  | 0.2172799  |
|  |  | 16 O O1   | 1.5546844  | -0.2222872 | -2.6101552 |
|  |  | 17 C C6   | 0.9886314  | -0.8803823 | -3.6404635 |
|  |  | 18 O O2   | 1.7007713  | -1.1823590 | -4.5712896 |
|  |  | 19 C C7   | -0.4862050 | -1.1783821 | -3.5902585 |
|  |  | 20 H H1   | -0.7544152 | -1.7058146 | -2.6713514 |
|  |  | 21 H H13  | -0.7444965 | -1.7899937 | -4.4541036 |
|  |  | 22 H H14  | -1.0623415 | -0.2477997 | -3.6256416 |
|  |  | 23 C C8   | 0.6918241  | -1.0878597 | -0.5480875 |
|  |  | 24 H H15  | 1.5407253  | -1.7633365 | -0.6448116 |
|  |  | 25 C C9   | -0.3187216 | -1.3674013 | 0.2822906  |
|  |  | 26 I I1   | -0.0864611 | -3.2138885 | 1.3543098  |
|  |  | 27 Si Si1 | -1.8941412 | -0.3425180 | 0.6641603  |

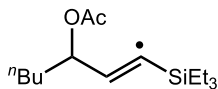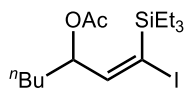

|  |       |     |            |            |            |
|--|-------|-----|------------|------------|------------|
|  | 28 C  | C10 | -2.8868309 | -0.1466425 | -0.9305925 |
|  | 29 H  | H18 | -2.2810313 | 0.3310795  | -1.7087231 |
|  | 30 H  | H19 | -3.6989291 | 0.5611153  | -0.7130285 |
|  | 31 C  | C11 | -3.4764720 | -1.4656522 | -1.4515010 |
|  | 32 H  | H16 | -2.6999325 | -2.2234639 | -1.6075947 |
|  | 33 H  | H20 | -3.9956161 | -1.3230819 | -2.4057029 |
|  | 34 H  | H21 | -4.1980629 | -1.8829735 | -0.7405876 |
|  | 35 C  | C12 | -1.3472997 | 1.3415720  | 1.3254079  |
|  | 36 H  | H22 | -2.2407302 | 1.8283301  | 1.7405662  |
|  | 37 H  | H23 | -1.0425839 | 1.9643553  | 0.4738531  |
|  | 38 C  | C13 | -0.2339415 | 1.3097192  | 2.3837320  |
|  | 39 H  | H2  | 0.6510882  | 0.7737566  | 2.0227386  |
|  | 40 H  | H24 | -0.5645454 | 0.8057023  | 3.2969864  |
|  | 41 H  | H25 | 0.0806227  | 2.3227226  | 2.6589011  |
|  | 42 C  | C14 | -3.0278452 | -1.2142836 | 1.8975183  |
|  | 43 H  | H17 | -3.1142637 | -2.2726521 | 1.6224744  |
|  | 44 H  | H26 | -4.0231351 | -0.7825458 | 1.7162189  |
|  | 45 C  | C15 | -2.6888055 | -1.0788528 | 3.3874822  |
|  | 46 H  | H27 | -1.6910014 | -1.4685912 | 3.6158406  |
|  | 47 H  | H28 | -3.4073614 | -1.6283566 | 4.0058679  |
|  | 48 H  | H29 | -2.7161012 | -0.0306658 | 3.7042847  |
|  | 1 C   | C1  | 0.8111619  | -0.3042043 | -1.6582618 |
|  | 2 H   | H3  | -0.1176523 | -0.0523664 | -2.1792618 |
|  | 3 C   | C2  | 1.4352580  | 0.9890024  | -1.1364297 |
|  | 4 H   | H5  | 0.6835685  | 1.4635519  | -0.4925009 |
|  | 5 H   | H6  | 1.5980523  | 1.6607515  | -1.9881920 |
|  | 6 C   | C3  | 2.7356170  | 0.8036654  | -0.3564736 |
|  | 7 H   | H4  | 2.5777276  | 0.0773740  | 0.4521924  |
|  | 8 H   | H8  | 3.5027999  | 0.3781214  | -1.0150979 |
|  | 9 C   | C4  | 3.2415501  | 2.1156341  | 0.2427147  |
|  | 10 H  | H9  | 2.4650735  | 2.5318921  | 0.8992142  |
|  | 11 H  | H10 | 3.3934798  | 2.8484982  | -0.5609339 |
|  | 12 C  | C5  | 4.5379174  | 1.9404273  | 1.0313580  |
|  | 13 H  | H7  | 4.3977402  | 1.2365589  | 1.8602191  |
|  | 14 H  | H11 | 4.8817996  | 2.8915033  | 1.4513596  |
|  | 15 H  | H12 | 5.3355151  | 1.5465628  | 0.3907120  |
|  | 16 O  | O1  | 1.7422956  | -0.8698754 | -2.5981401 |
|  | 17 C  | C6  | 1.3665680  | -1.7869062 | -3.5099815 |
|  | 18 O  | O2  | 2.2210054  | -2.2445431 | -4.2355275 |
|  | 19 C  | C7  | -0.0883875 | -2.1748241 | -3.5913215 |
|  | 20 H  | H1  | -0.4663421 | -2.5157446 | -2.6228960 |
|  | 21 H  | H13 | -0.1904696 | -2.9713830 | -4.3277055 |
|  | 22 H  | H14 | -0.6954943 | -1.3179910 | -3.9024939 |
|  | 23 C  | C8  | 0.5192533  | -1.2976320 | -0.5361763 |
|  | 24 H  | H15 | 1.2210517  | -2.1347800 | -0.4622712 |
|  | 25 C  | C9  | -0.4656046 | -1.1332817 | 0.3157411  |
|  | 26 Si | Si1 | -1.8789172 | -0.0931889 | 0.9080830  |
|  | 27 C  | C10 | -2.7518398 | 0.6315209  | -0.6066877 |
|  | 28 H  | H18 | -2.0501093 | 1.3052271  | -1.1168513 |
|  | 29 H  | H19 | -3.5738275 | 1.2663495  | -0.2469694 |
|  | 30 C  | C11 | -3.2869433 | -0.4139964 | -1.5935766 |
|  | 31 H  | H16 | -2.4774511 | -1.0463859 | -1.9764953 |
|  | 32 H  | H20 | -3.7749064 | 0.0572417  | -2.4543499 |
|  | 33 H  | H21 | -4.0210502 | -1.0740379 | -1.1178985 |
|  | 34 C  | C12 | -1.1773809 | 1.3091205  | 1.9710779  |
|  | 35 H  | H22 | -1.9768577 | 1.6445027  | 2.6463295  |
|  | 36 H  | H23 | -0.9668792 | 2.1585845  | 1.3072747  |
|  | 37 C  | C13 | 0.0828353  | 0.9697510  | 2.7791210  |
|  | 38 H  | H2  | 0.9081039  | 0.6845891  | 2.1172094  |
|  | 39 H  | H24 | -0.0889748 | 0.1332729  | 3.4653104  |
|  | 40 H  | H25 | 0.4151978  | 1.8265519  | 3.3764586  |
|  | 41 C  | C14 | -3.0732973 | -1.1775687 | 1.8853347  |
|  | 42 H  | H17 | -3.3848400 | -2.0132739 | 1.2450320  |
|  | 43 H  | H26 | -3.9800281 | -0.5874555 | 2.0778895  |
|  | 44 C  | C15 | -2.5077629 | -1.7121600 | 3.2082336  |
|  | 45 H  | H27 | -1.5893750 | -2.2877667 | 3.0442665  |
|  | 46 H  | H28 | -3.2242660 | -2.3674183 | 3.7163613  |
|  | 47 H  | H29 | -2.2649142 | -0.8934709 | 3.8950004  |

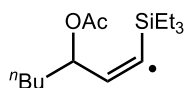

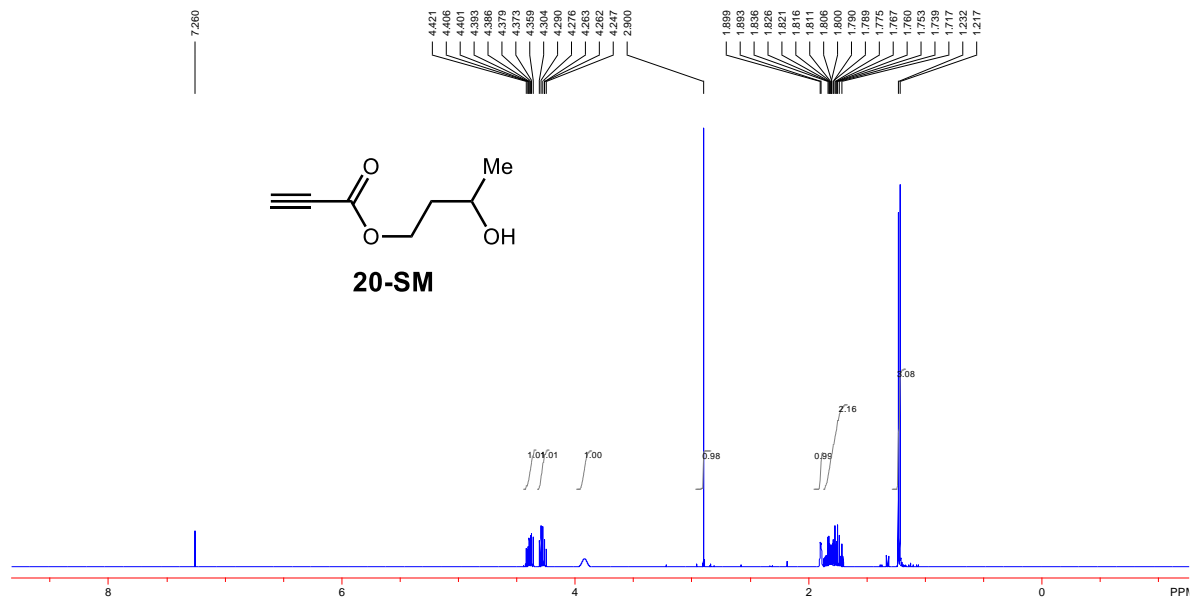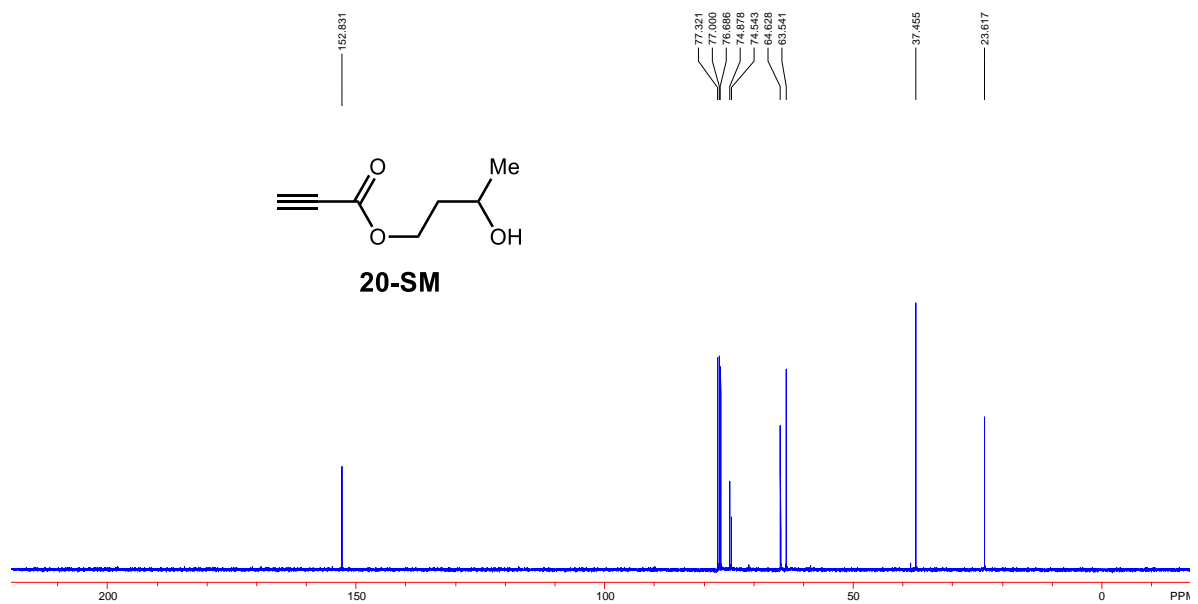

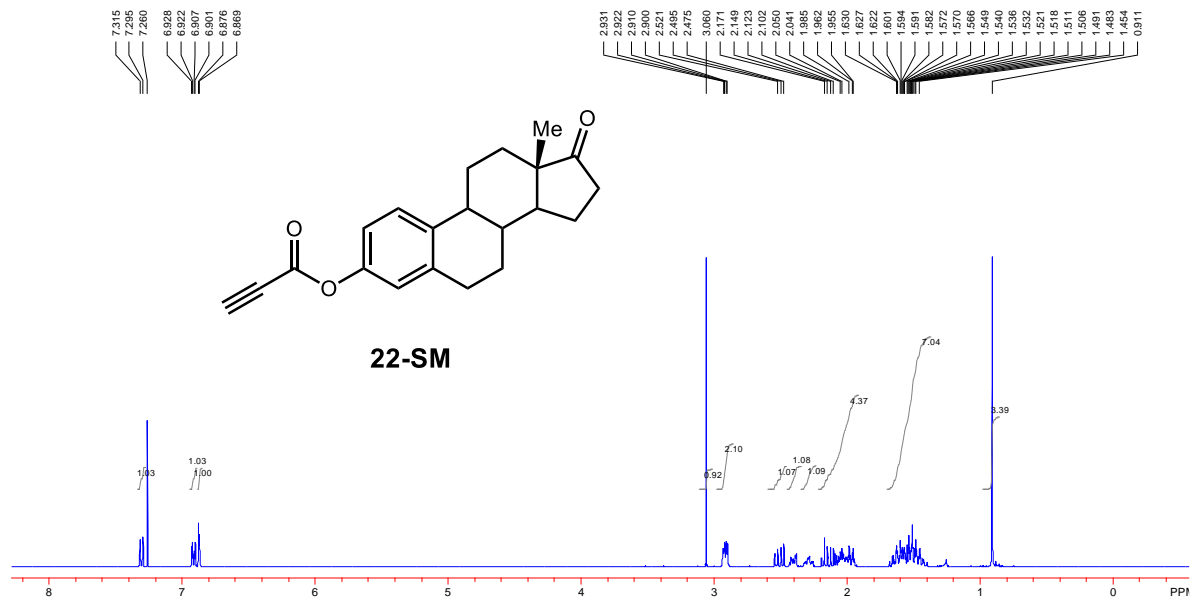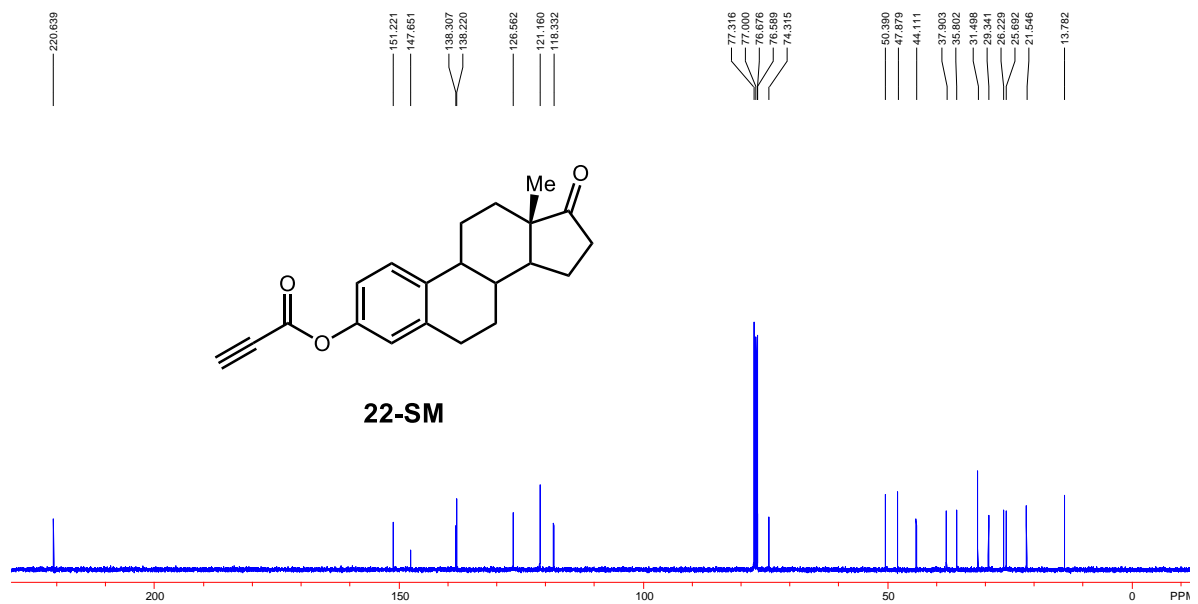

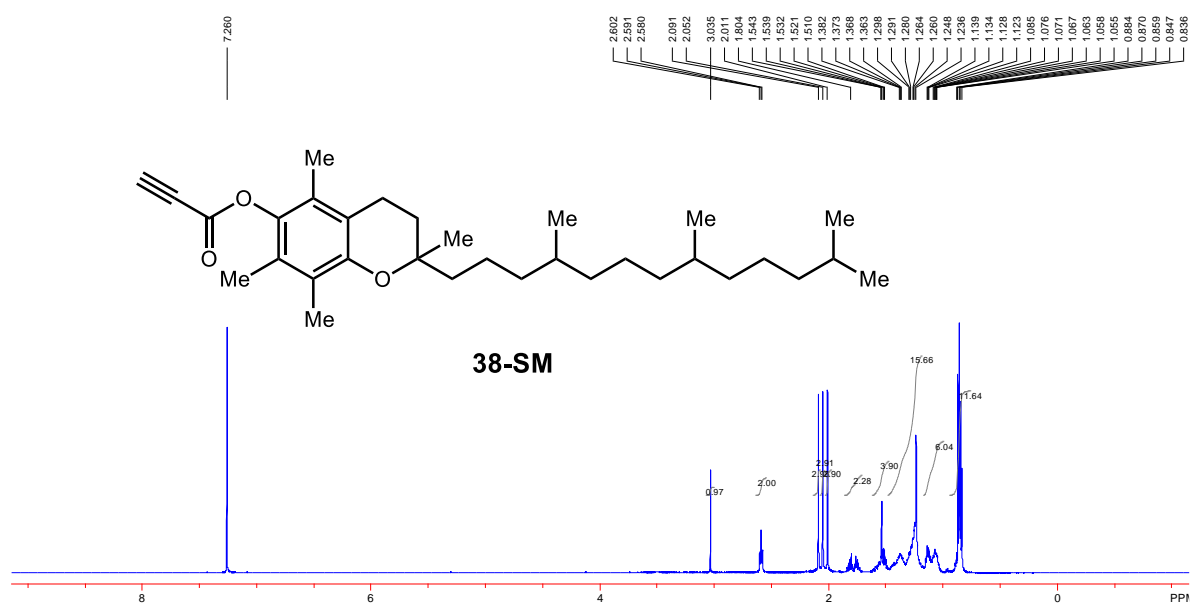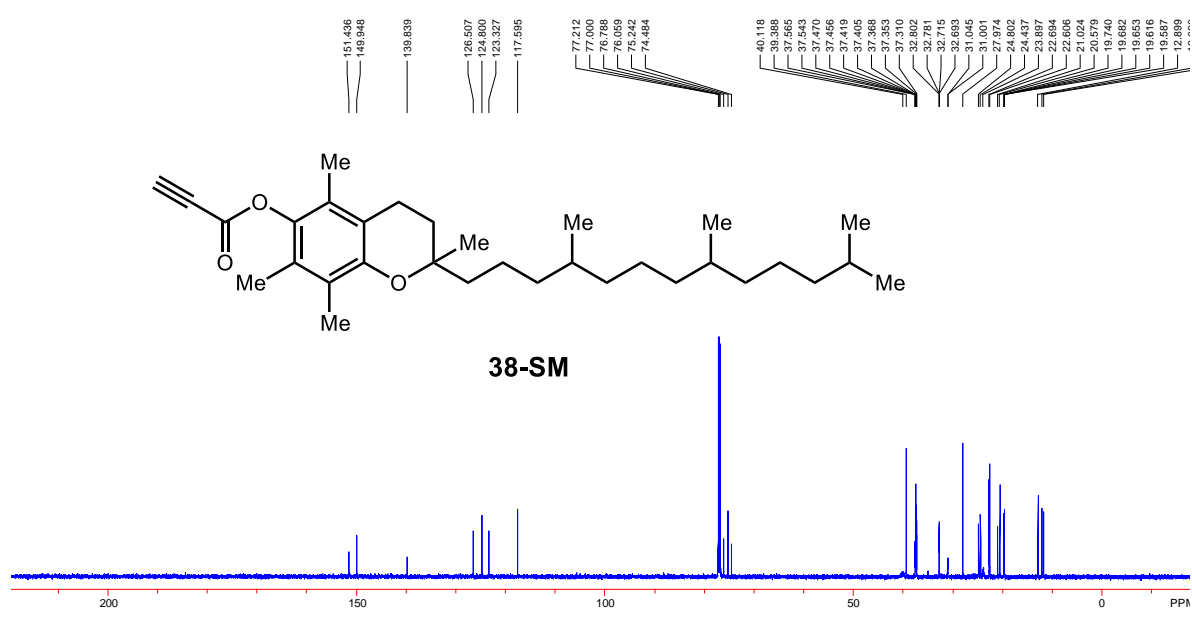

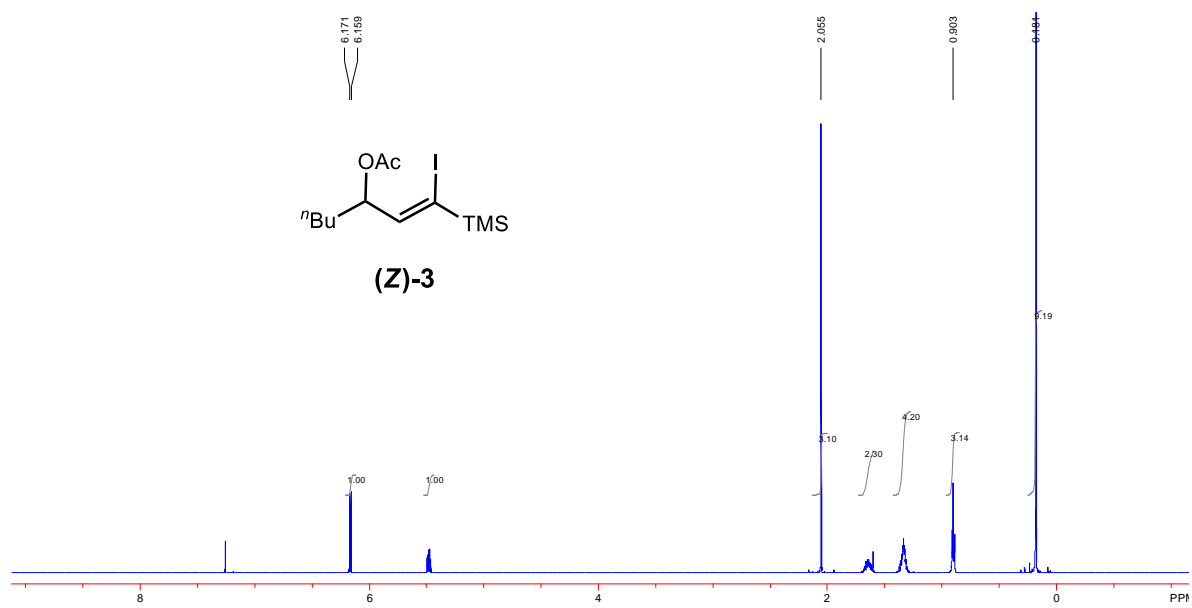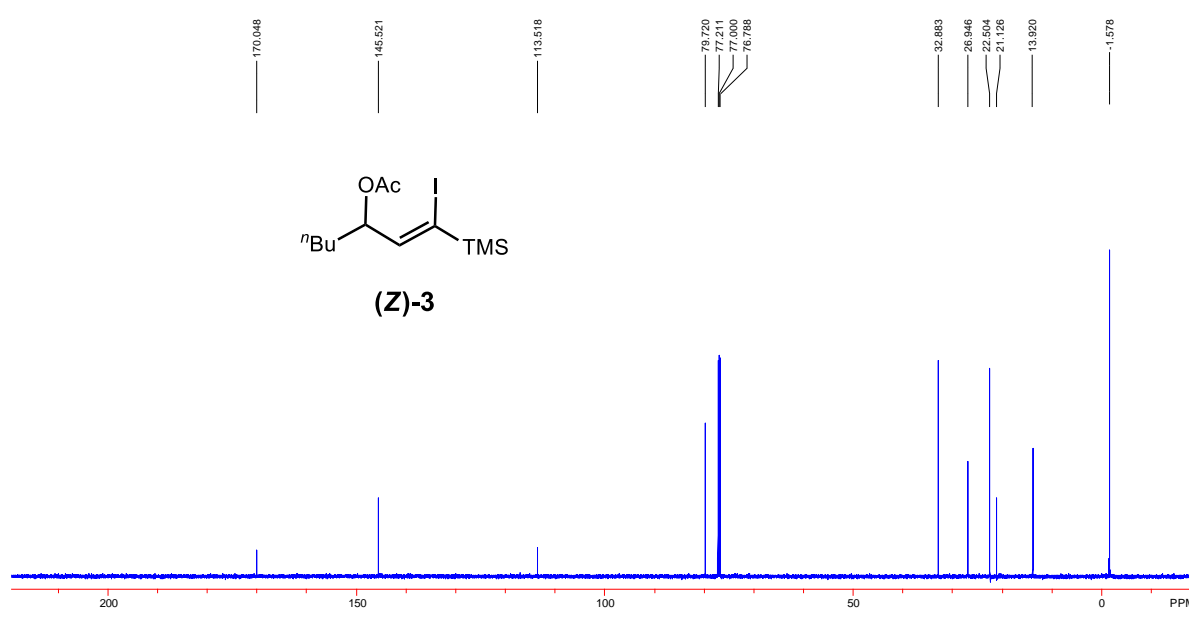

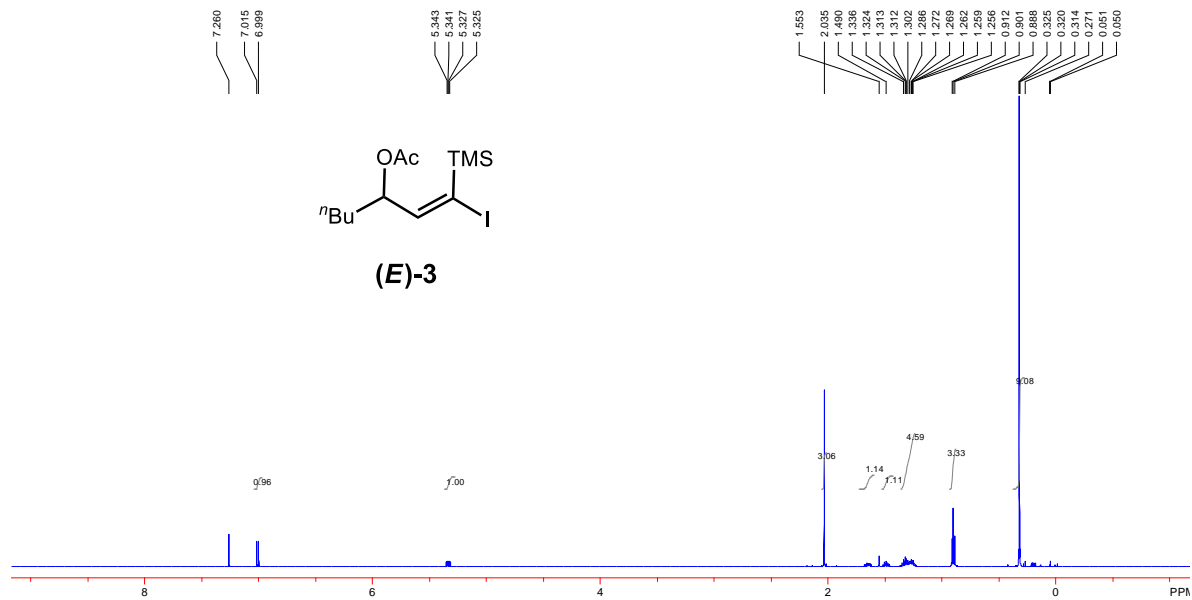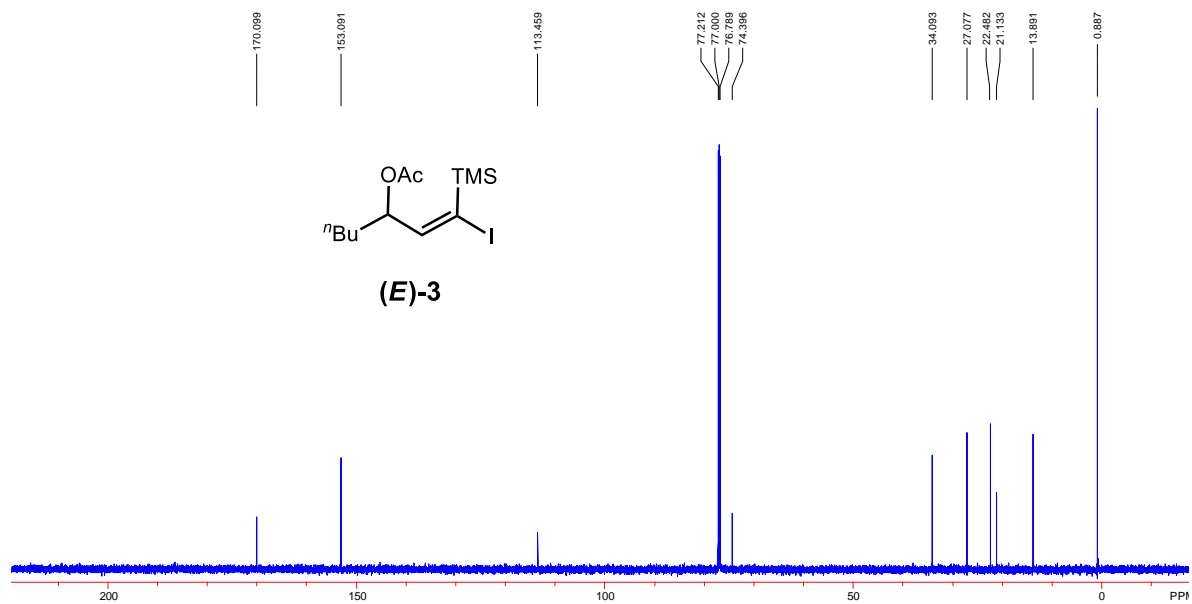



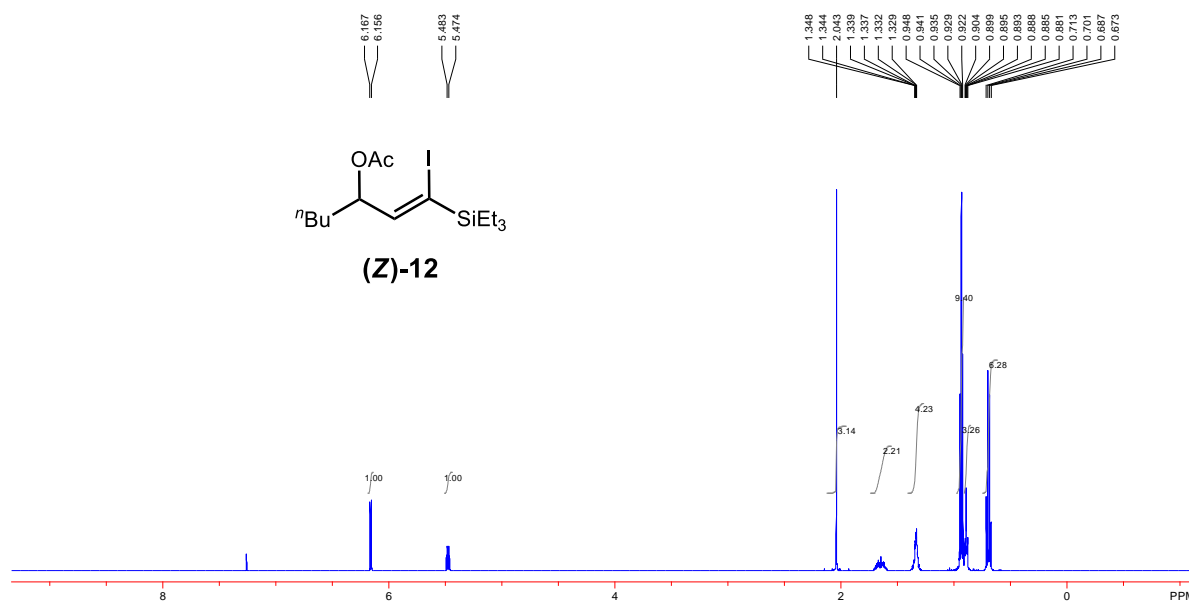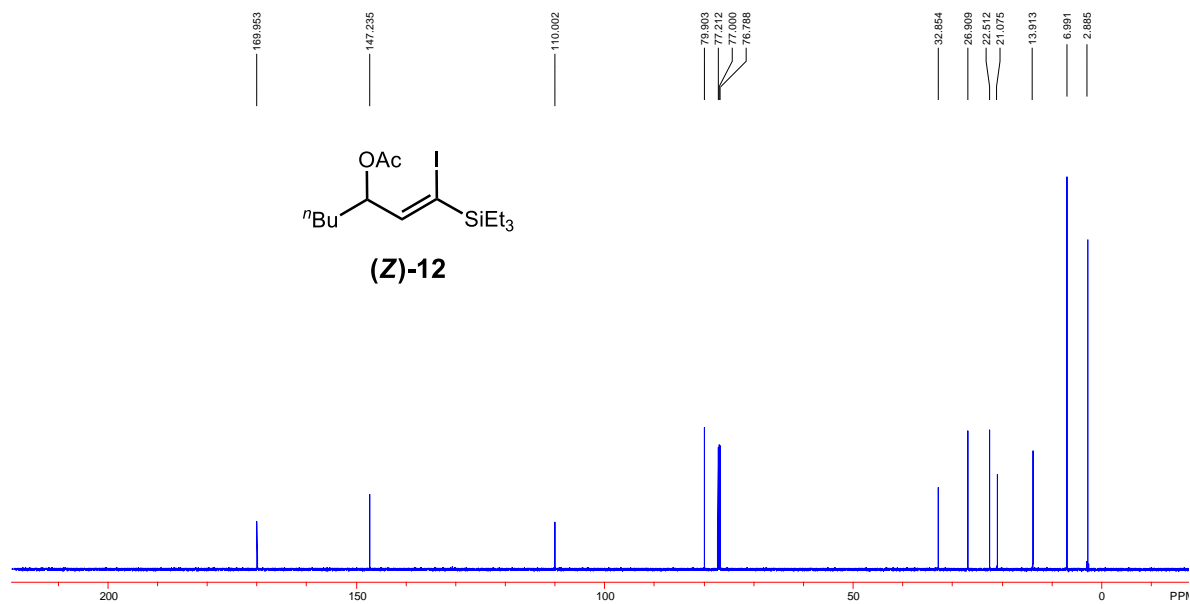

7.260  
7.148  
7.148

0.897  
2.033  
0.993  
0.975  
0.975  
0.915  
0.915  
0.897  
0.891  
0.880  
0.862  
0.862  
0.850  
0.835  
0.833  
0.815  
0.810  
0.795  
0.780  
0.778  
0.773  
0.758

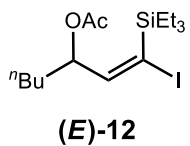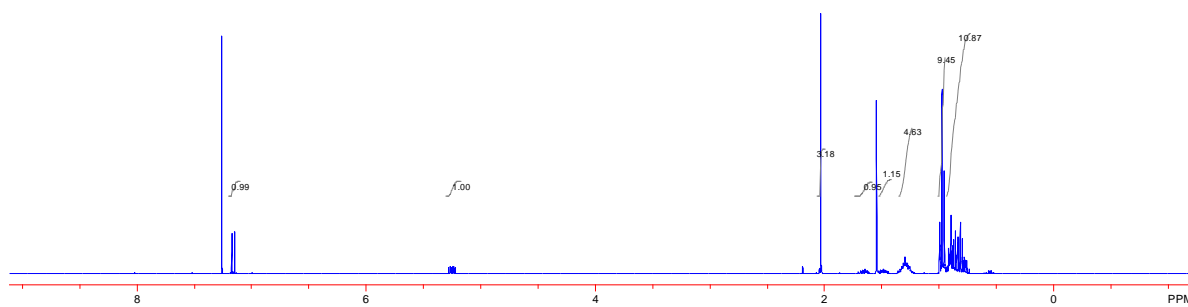

170.030

155.157

111.456

77.321

77.000

76.686

74.703

34.485

27.131

22.531

21.109

13.888

7.283

4.632

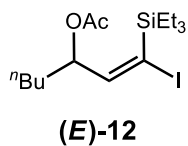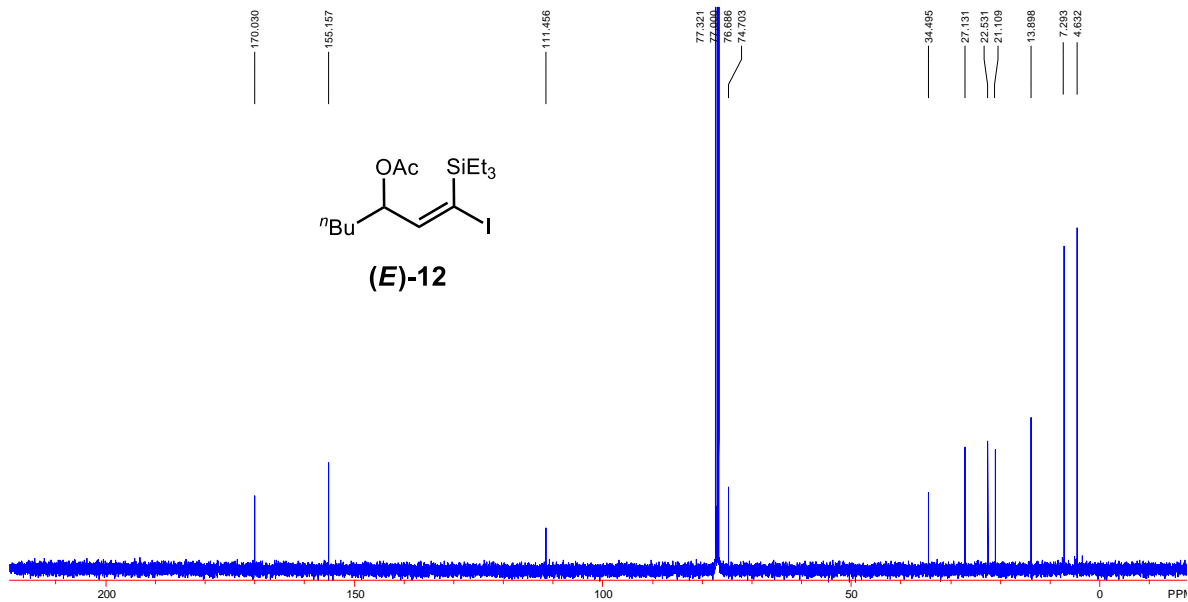

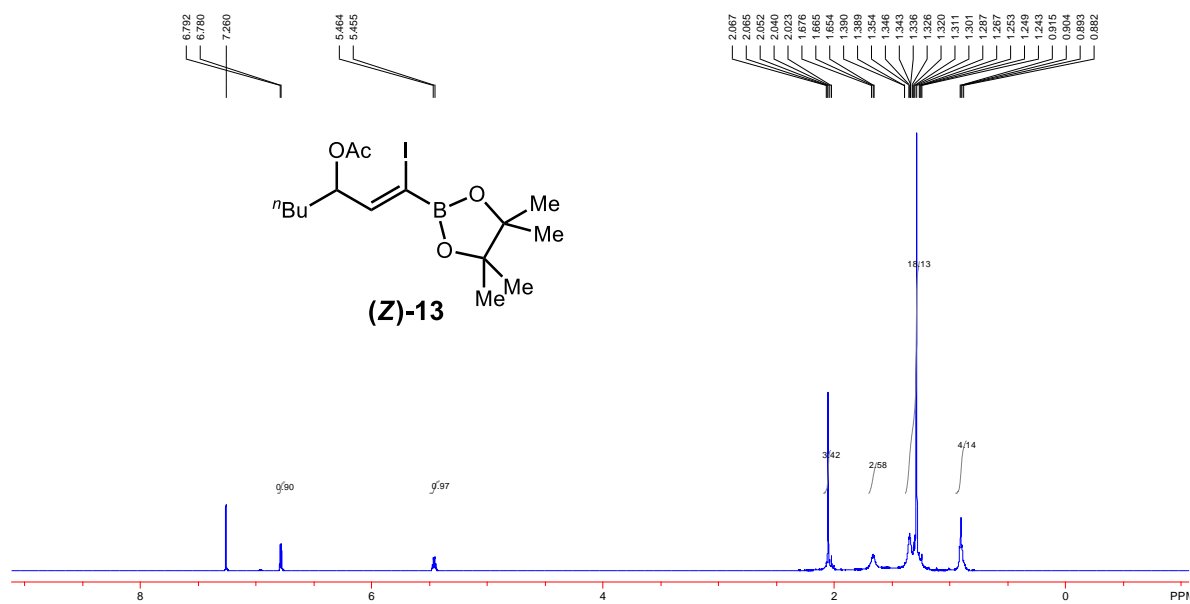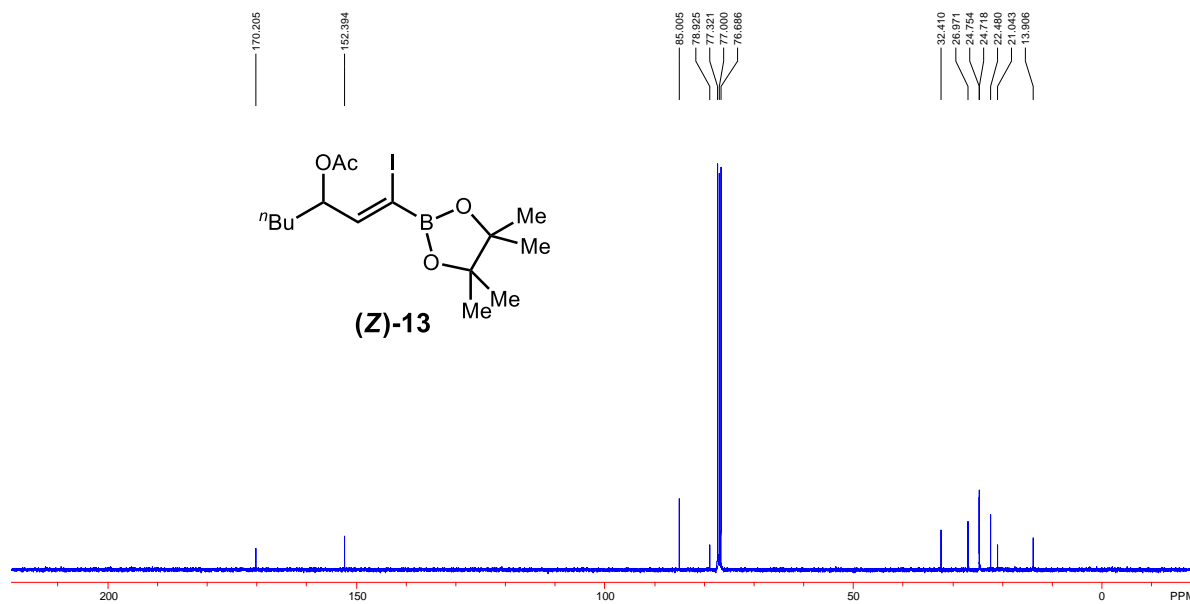

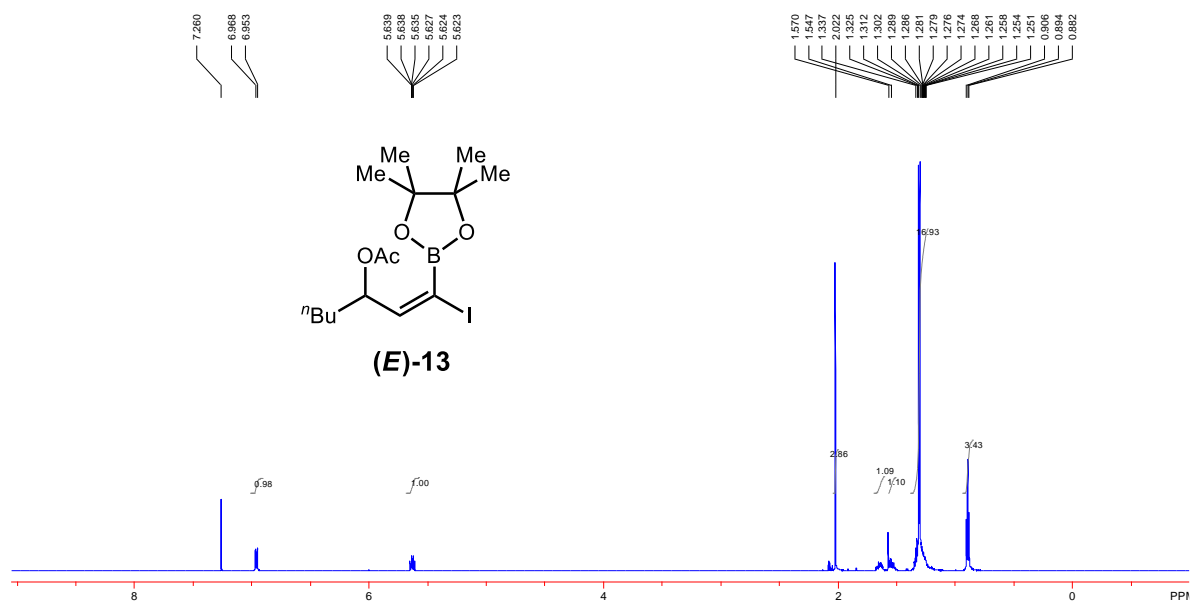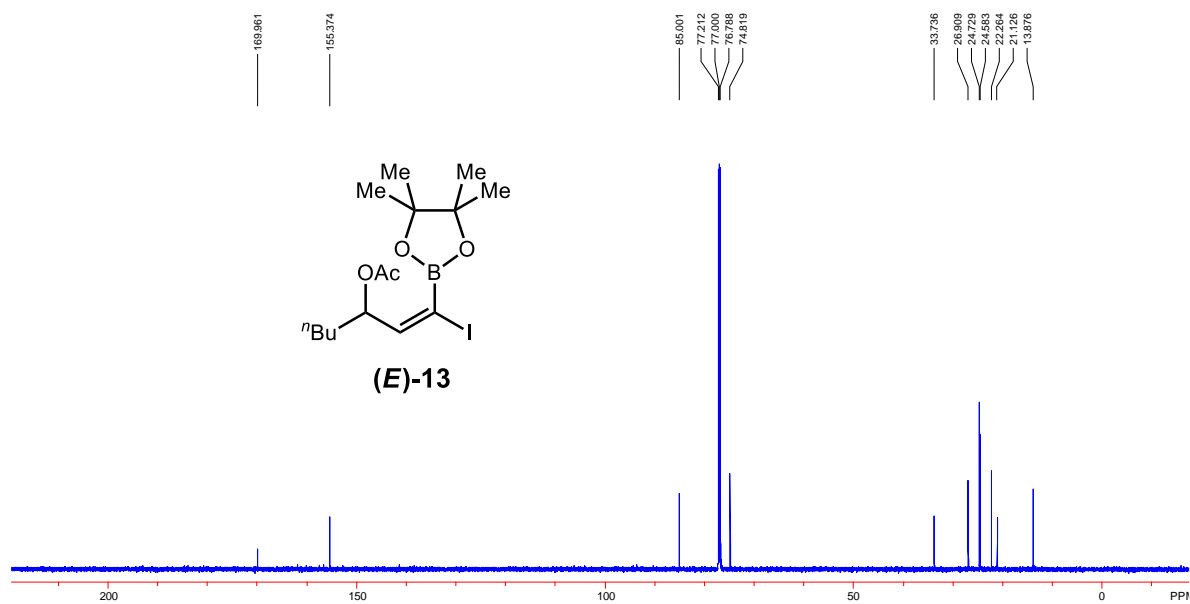

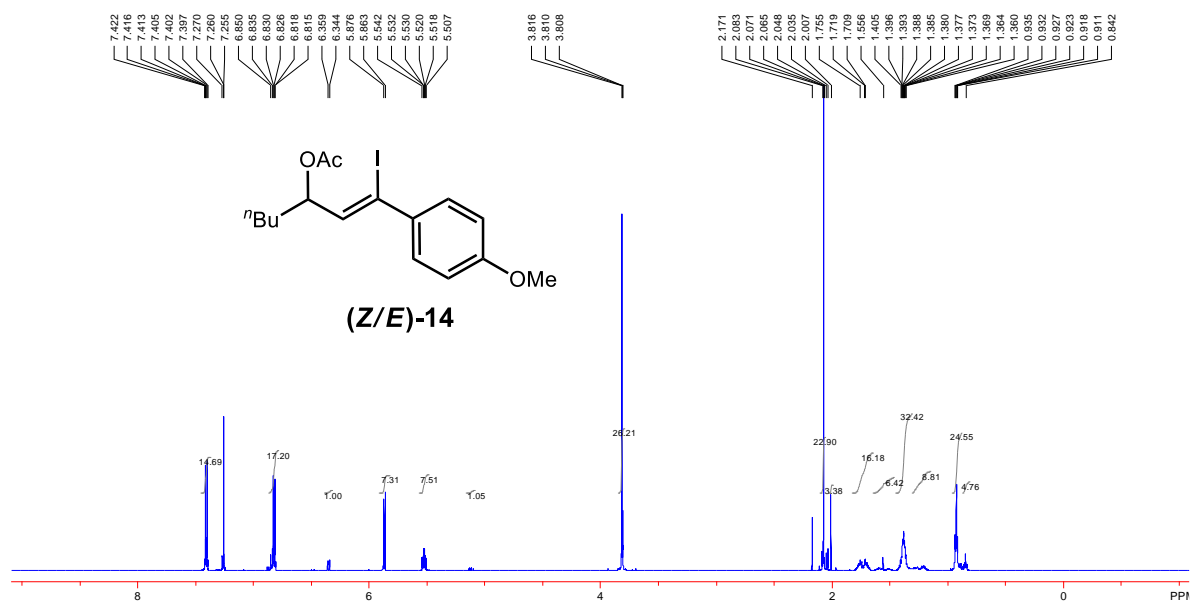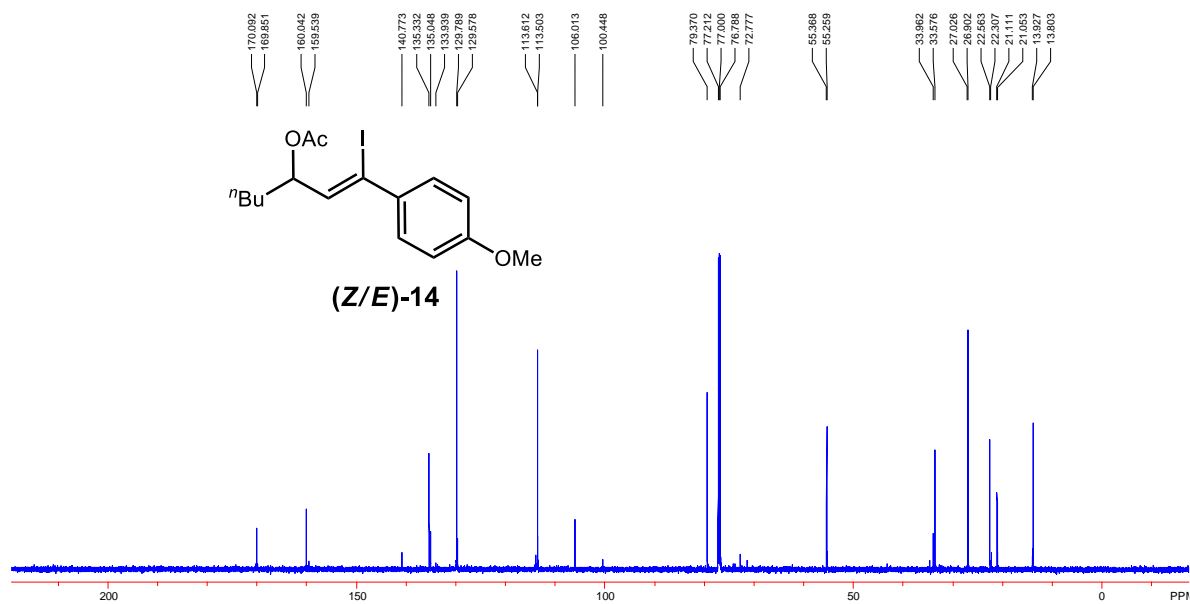

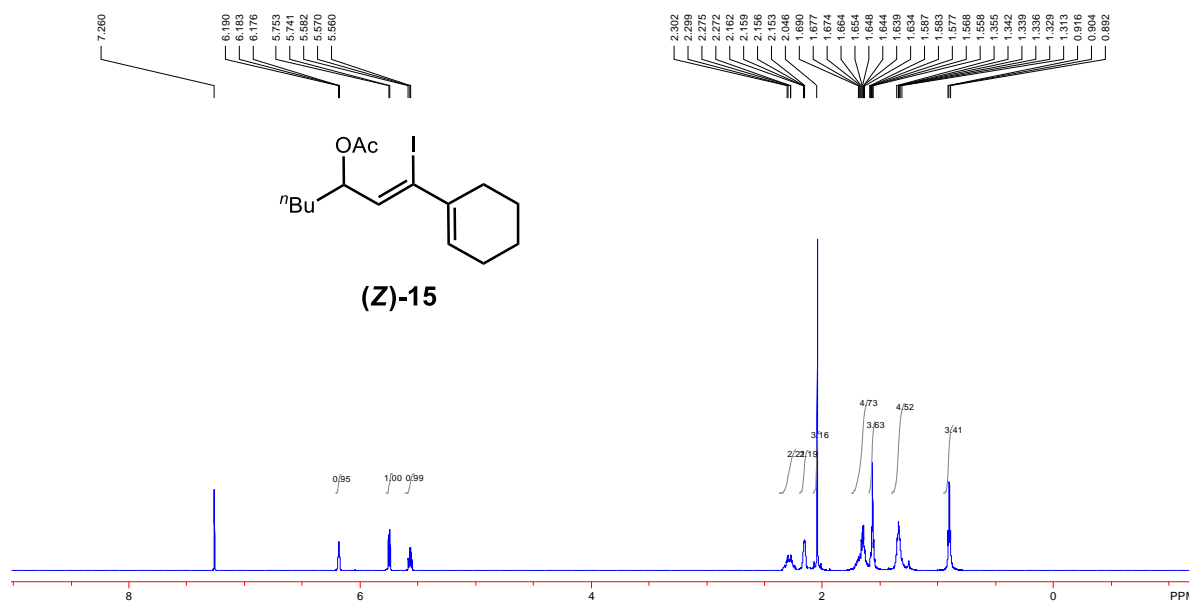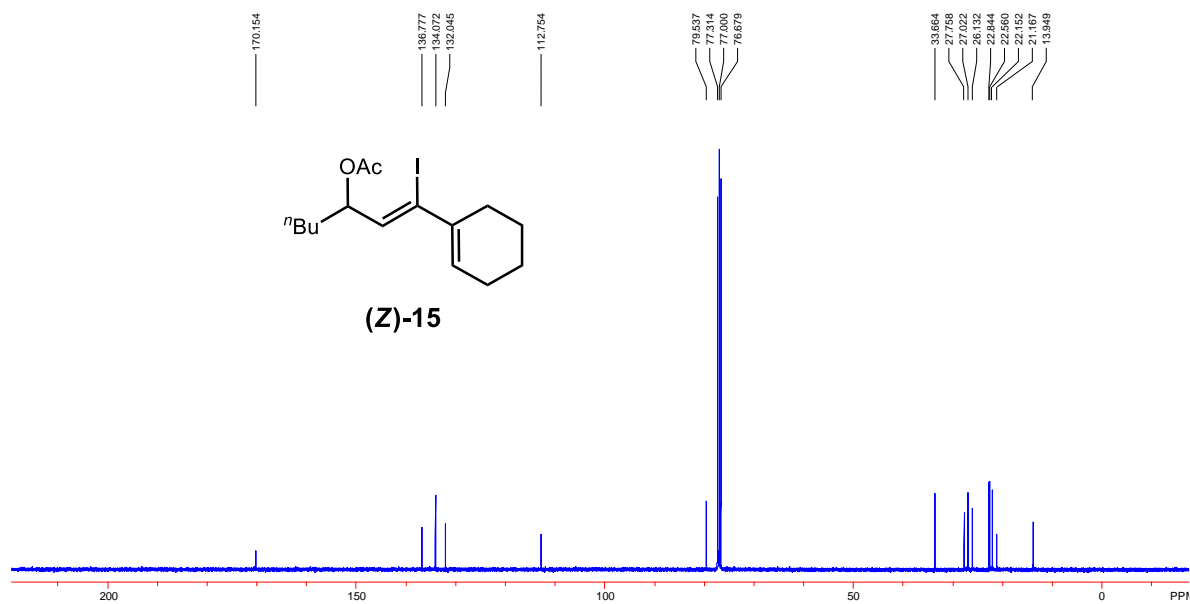

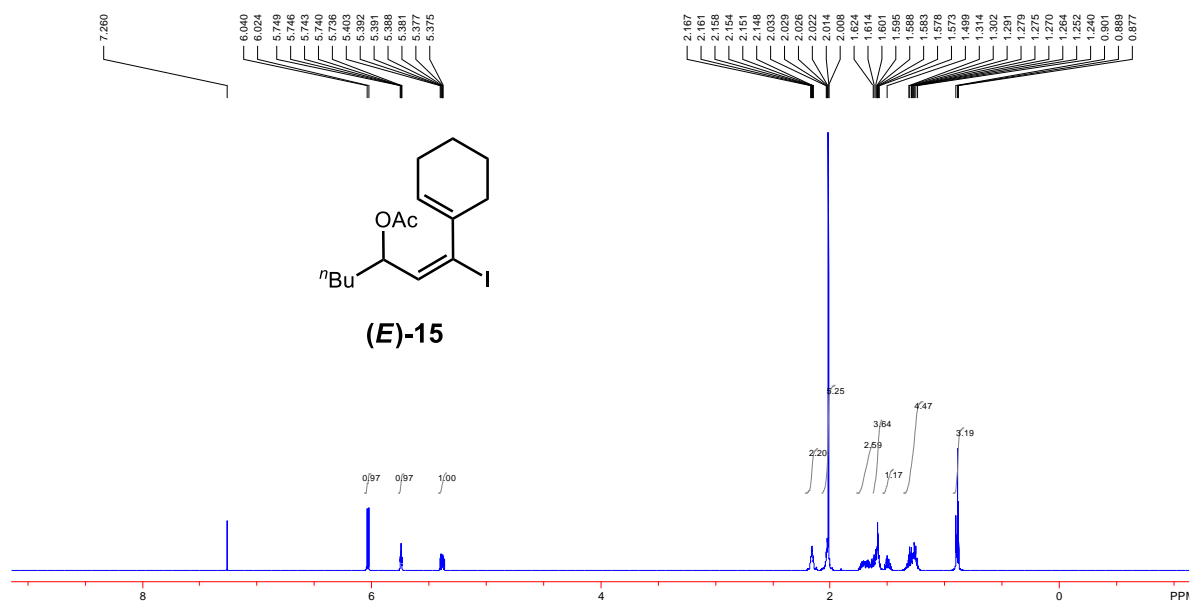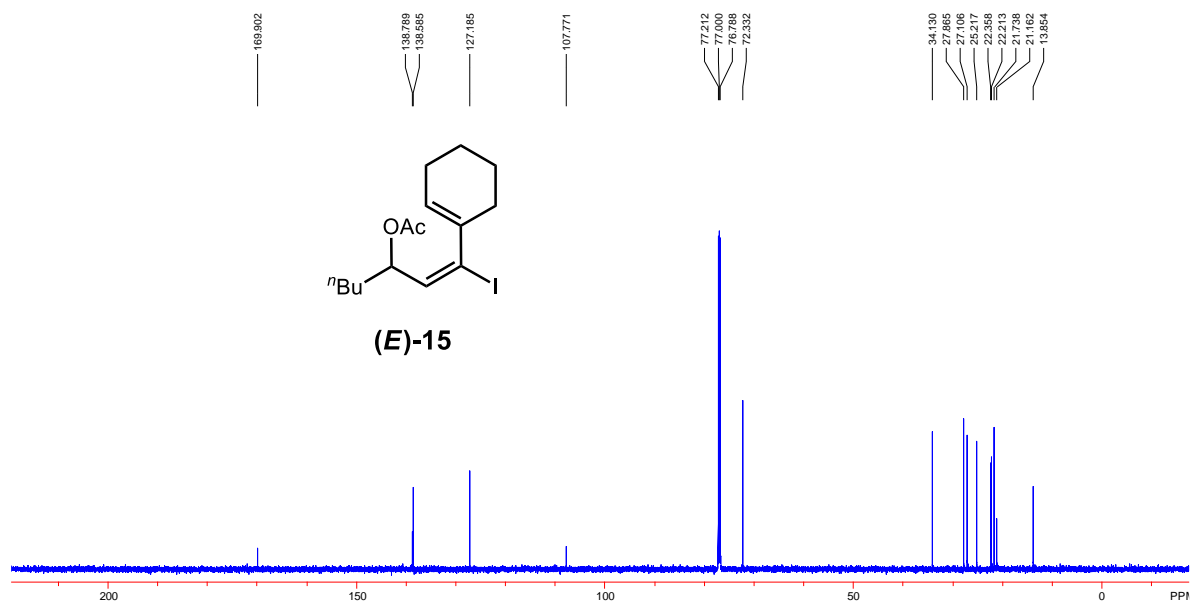

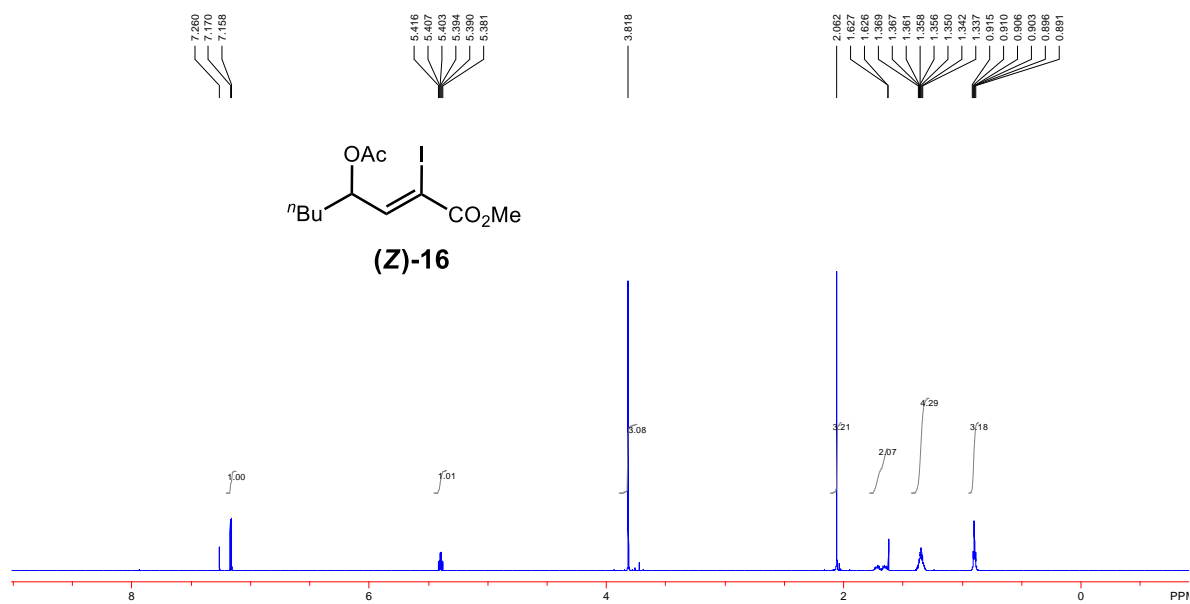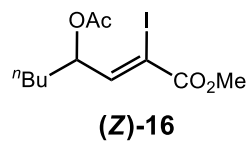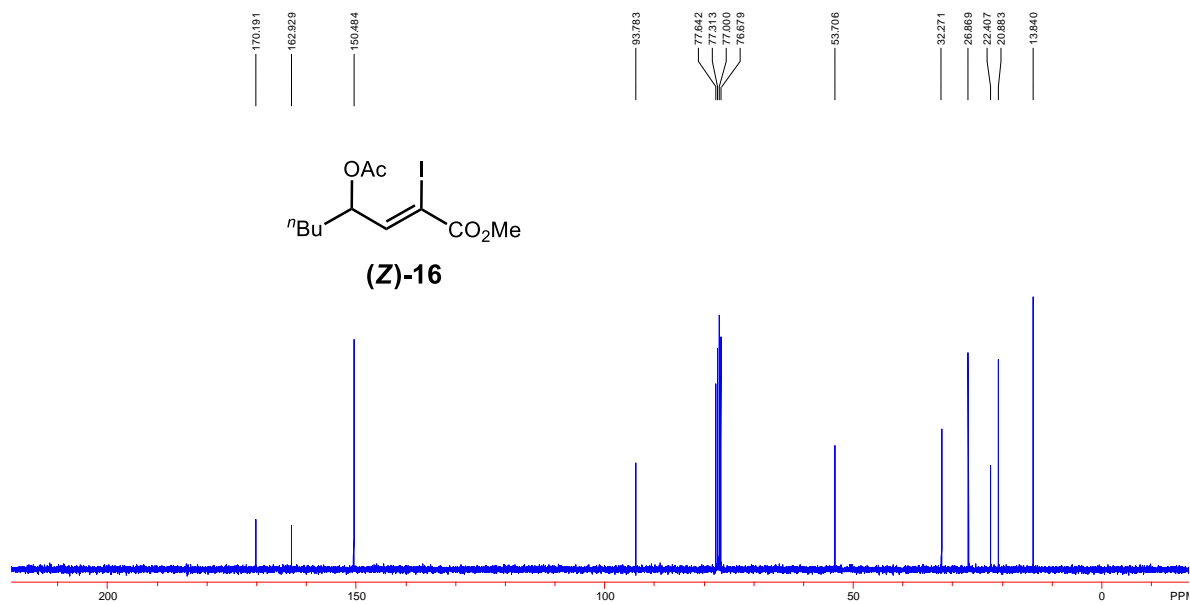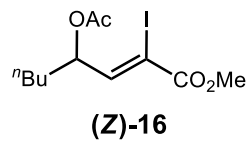



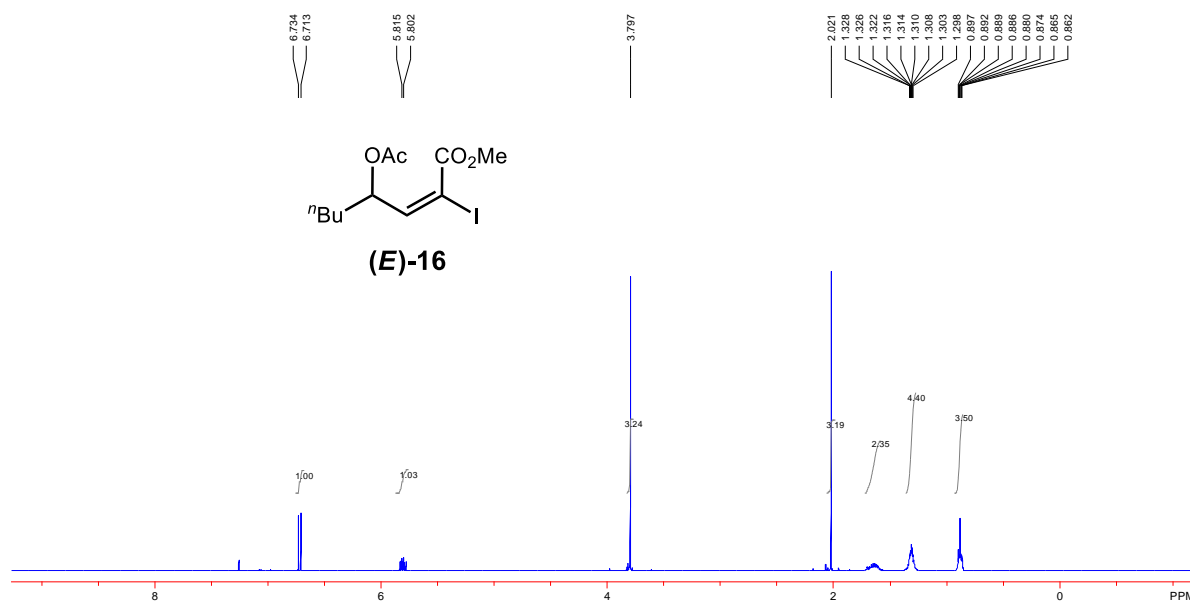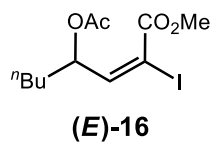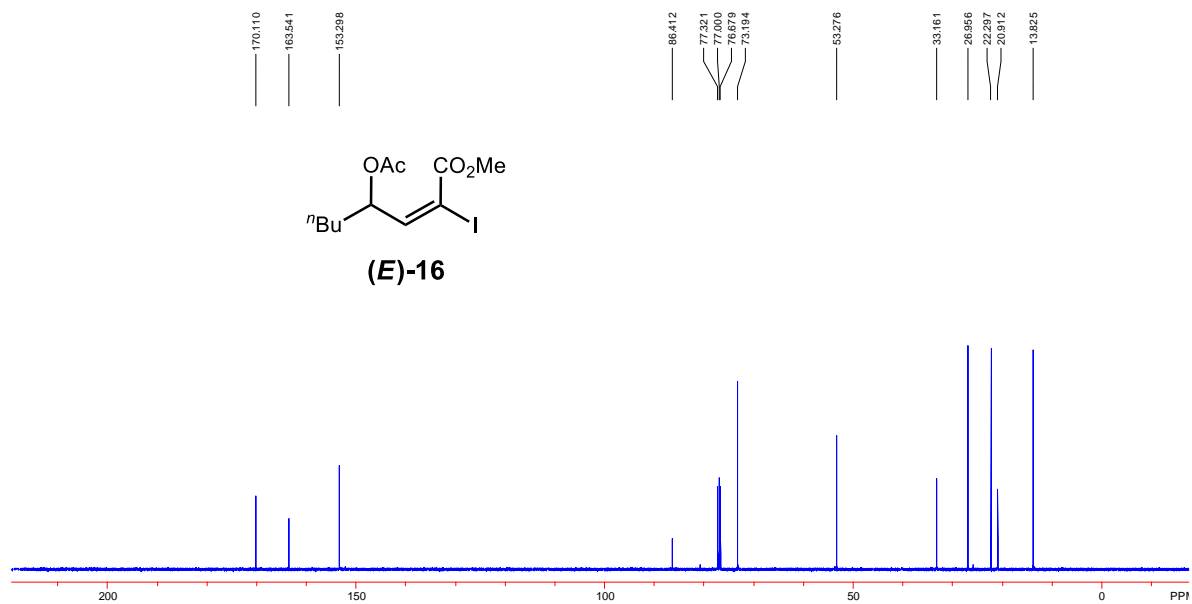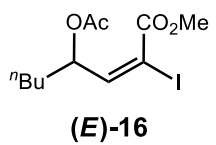

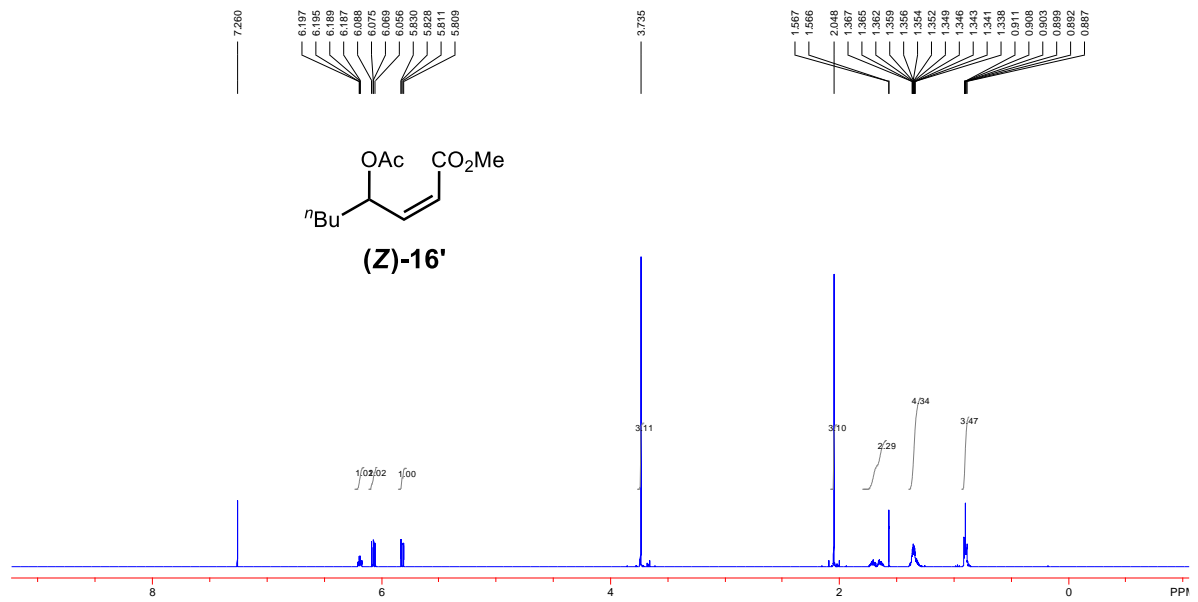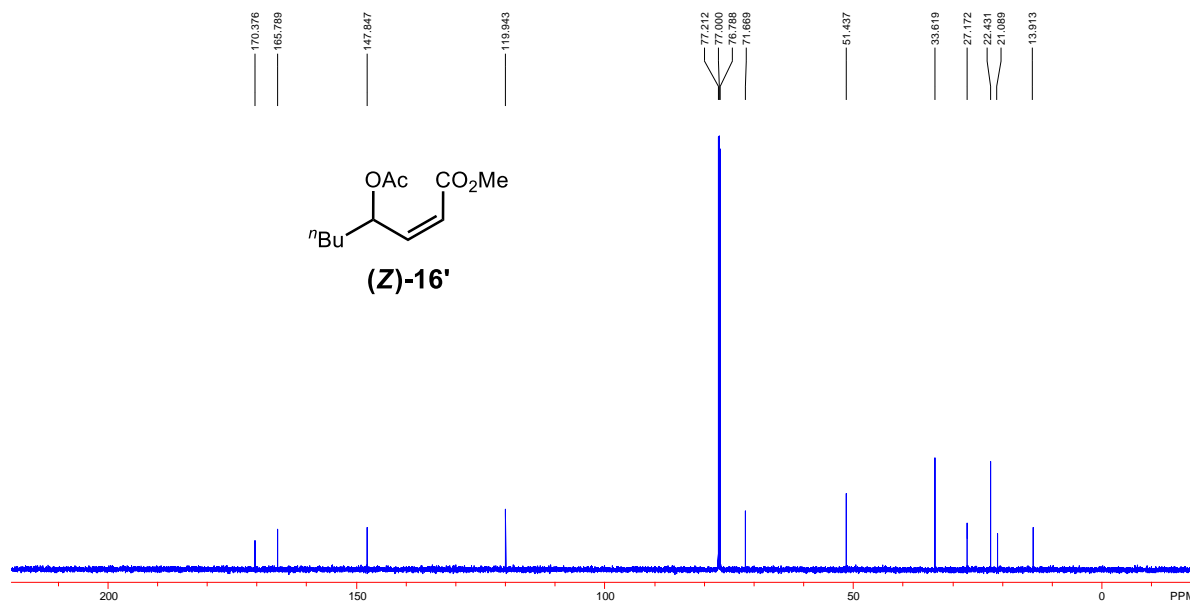

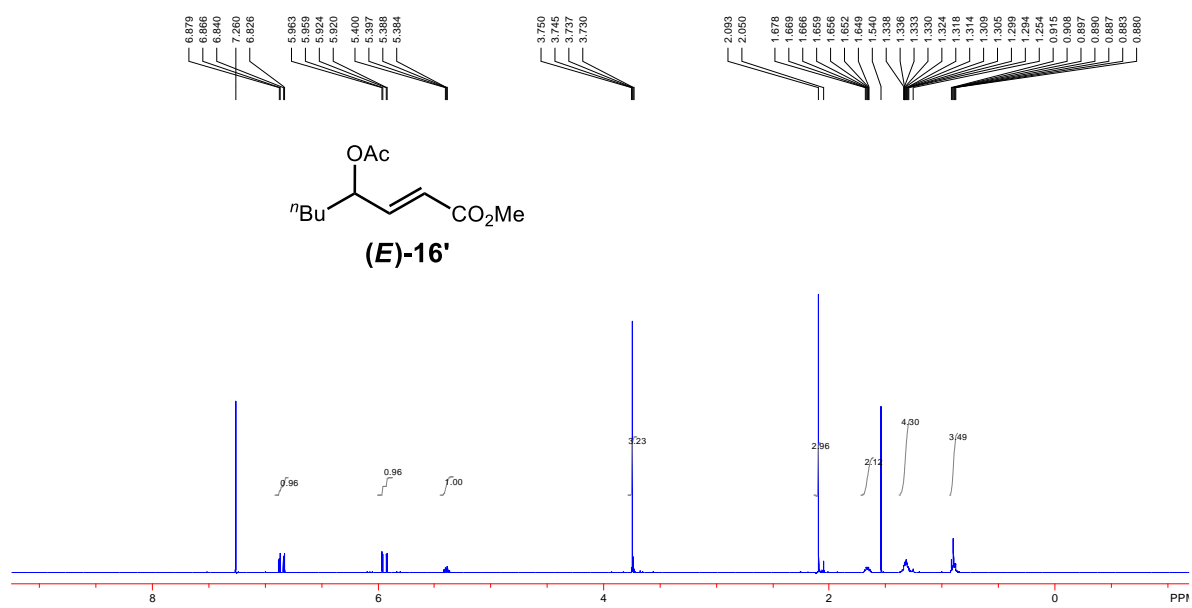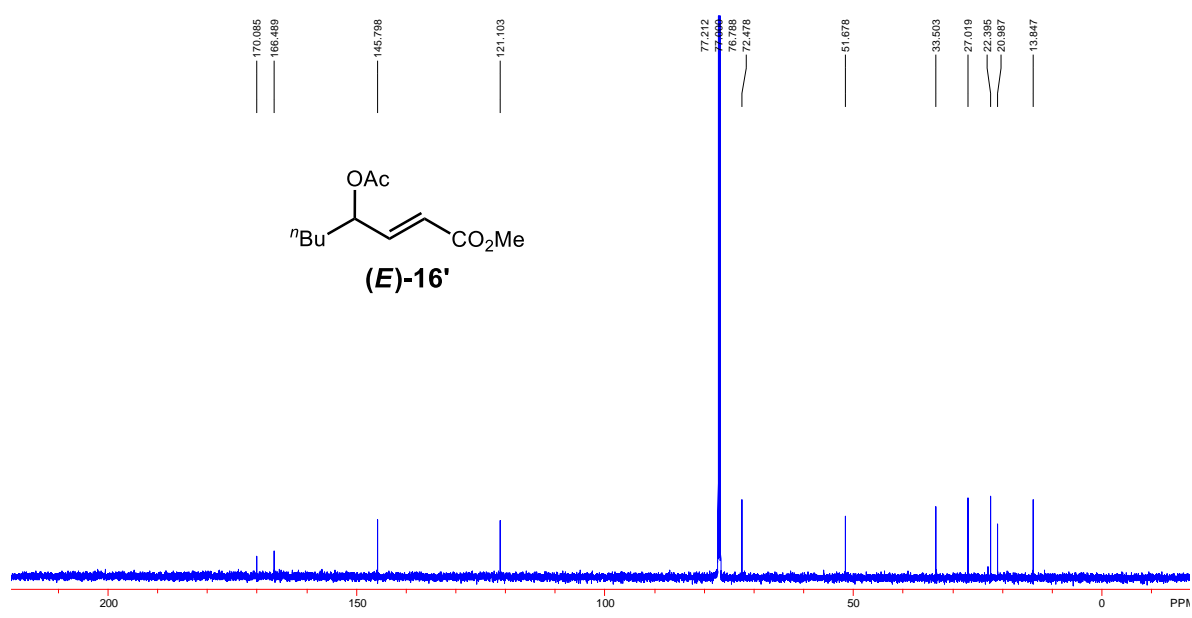

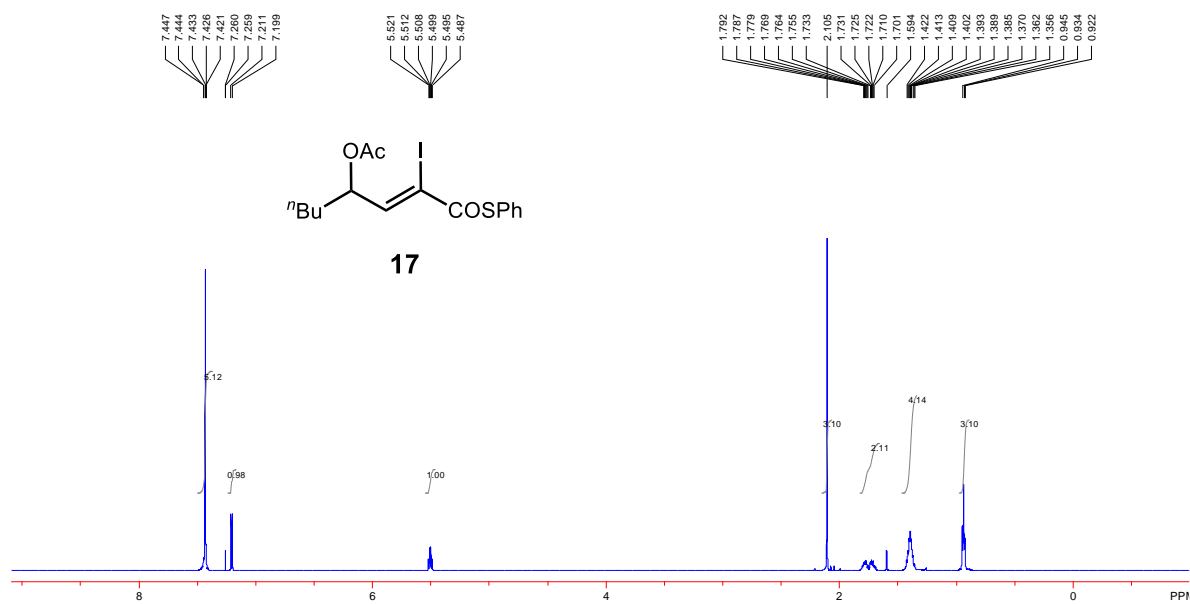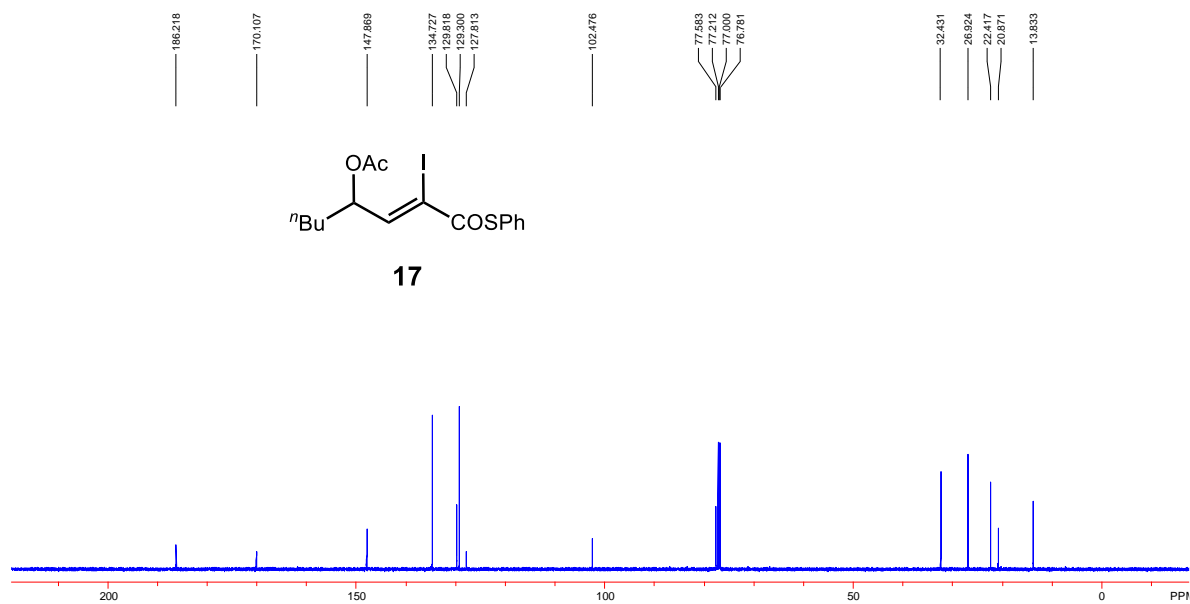

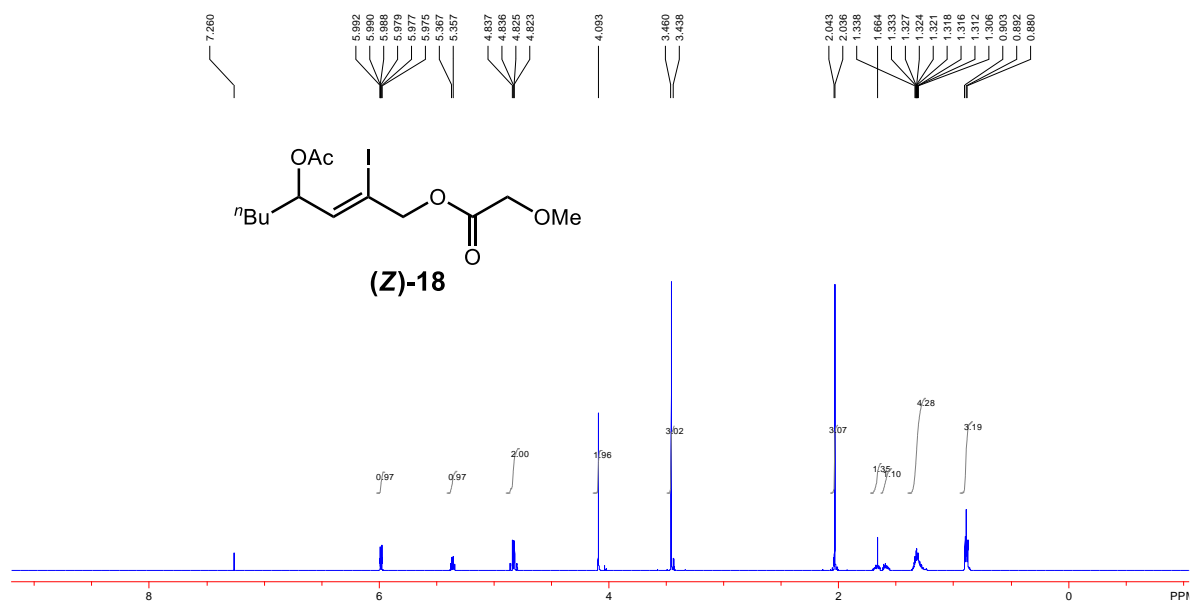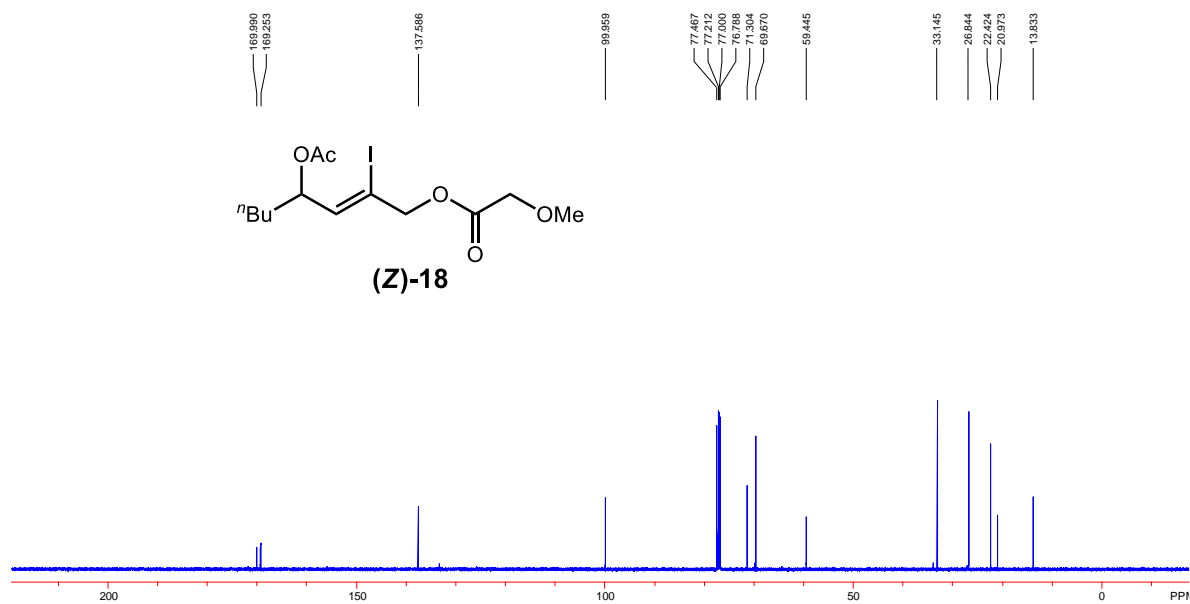

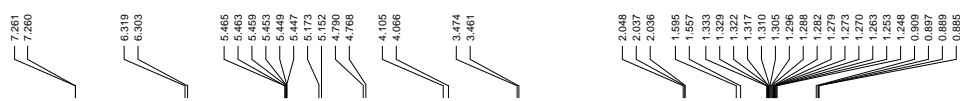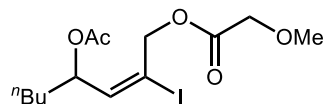

**(E)-18**

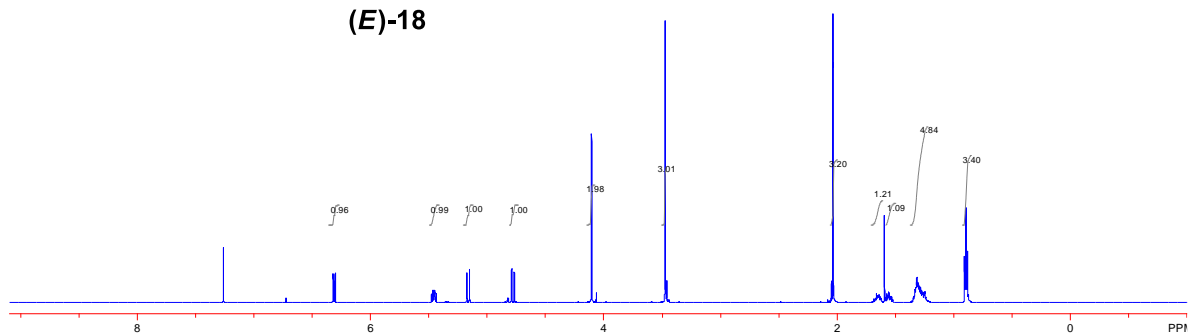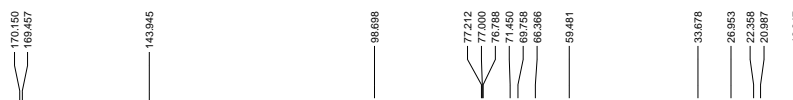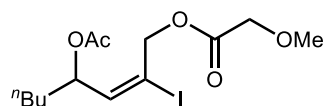

**(E)-18**

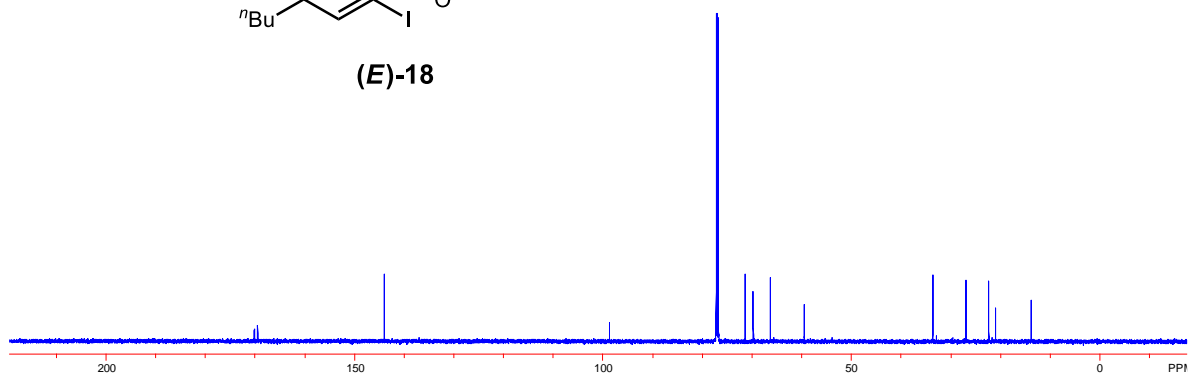

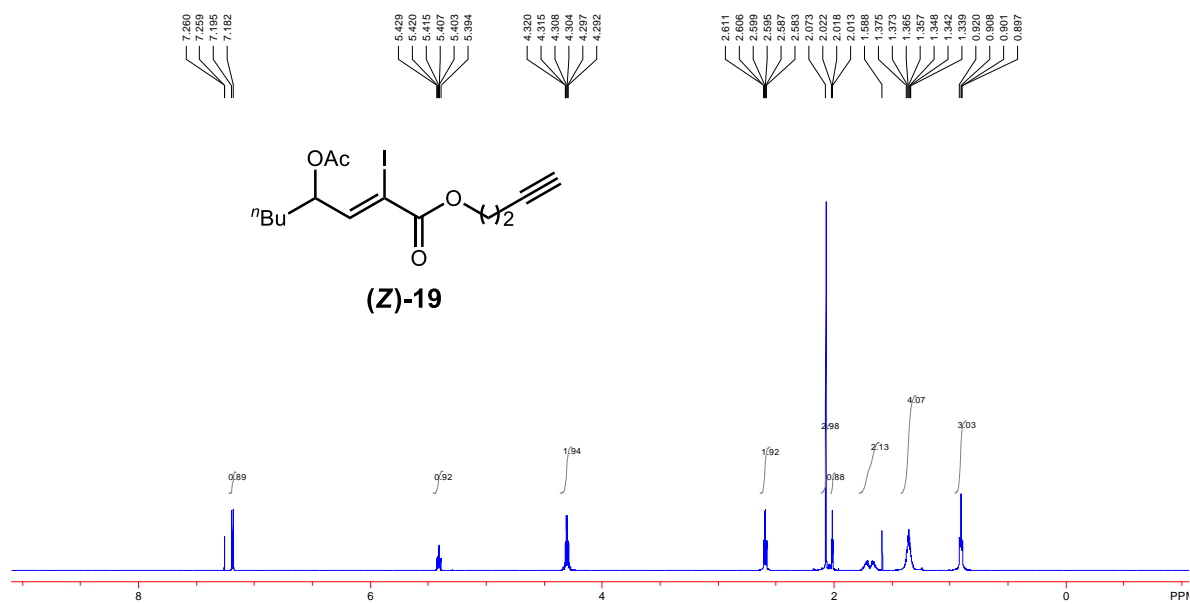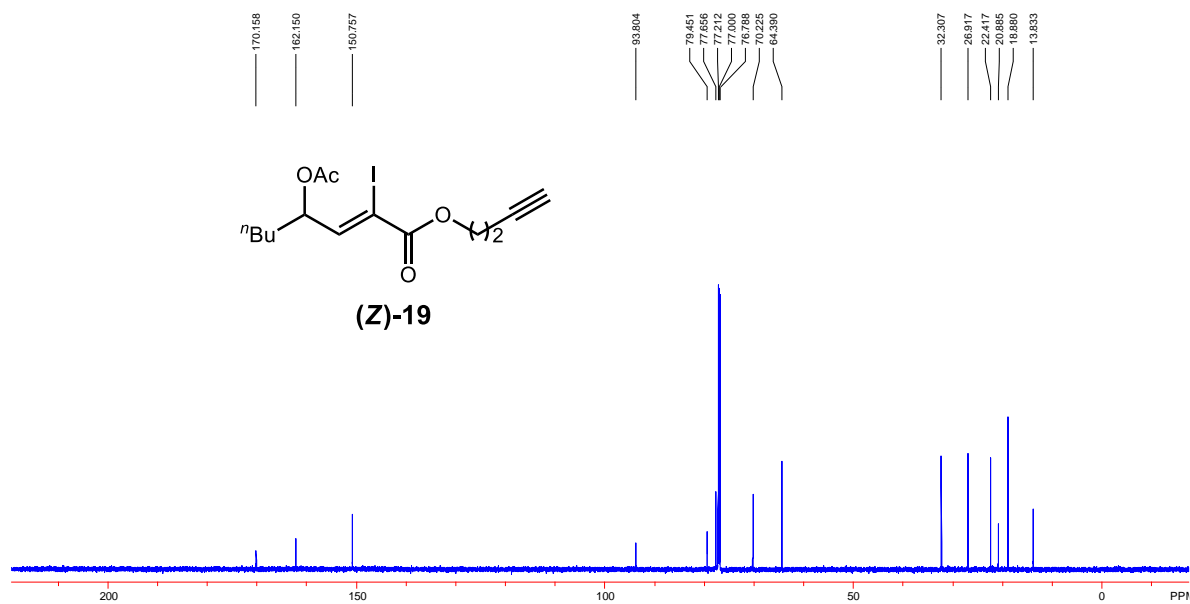

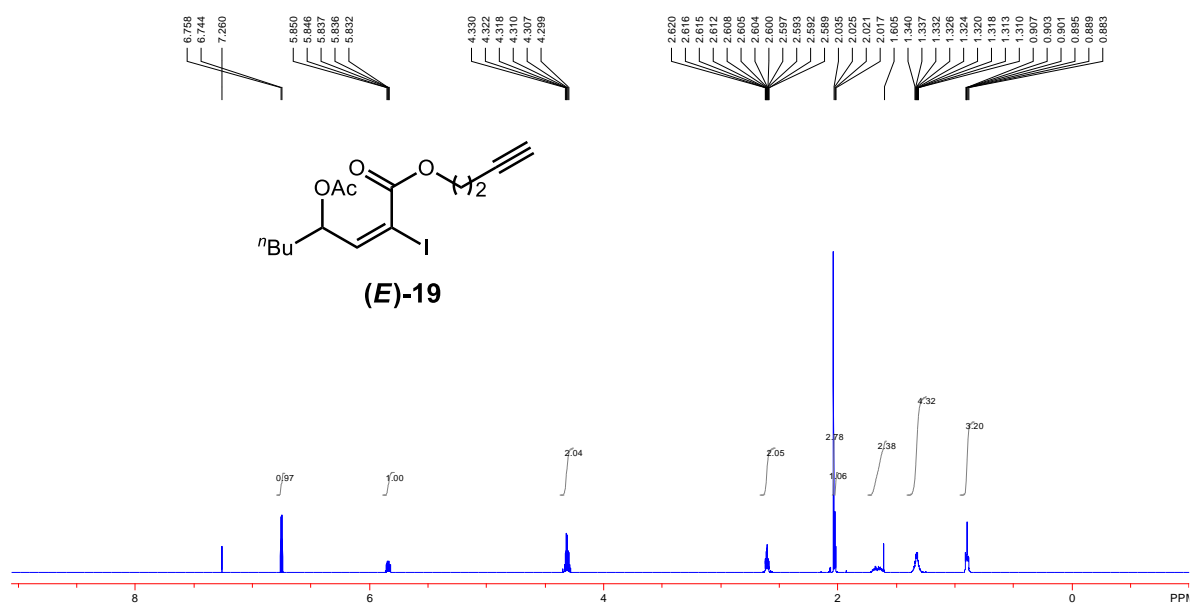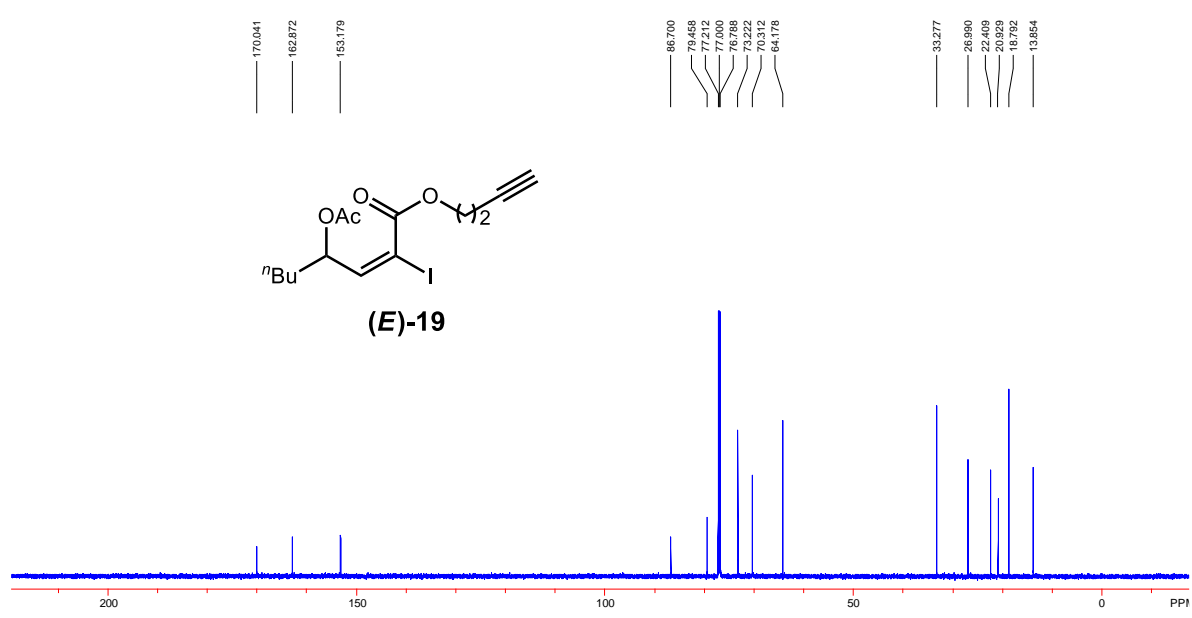



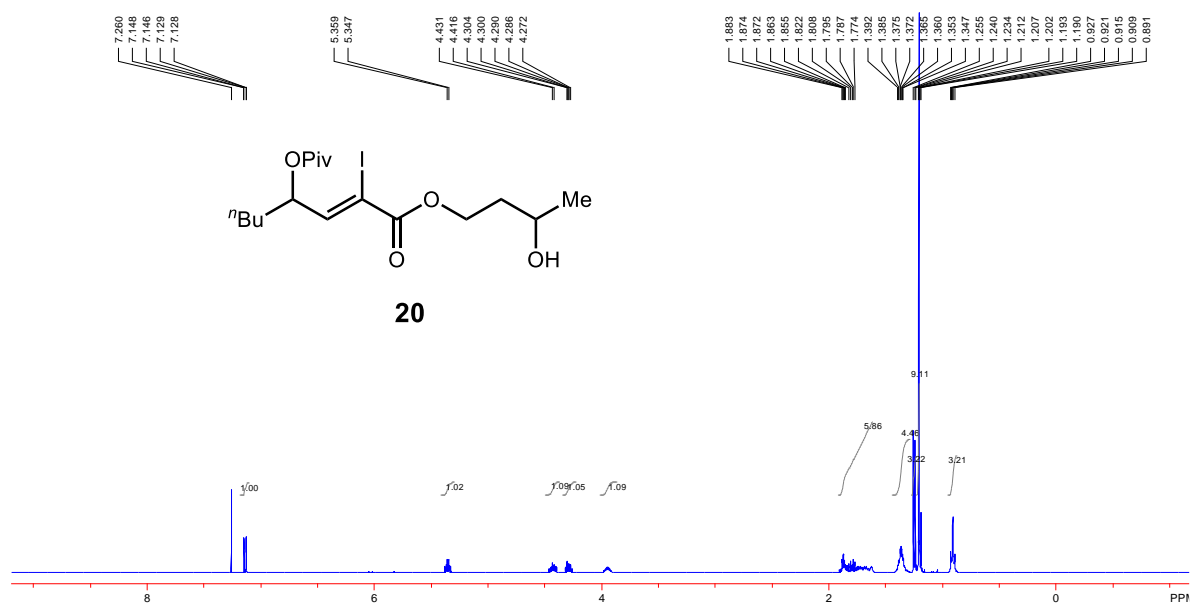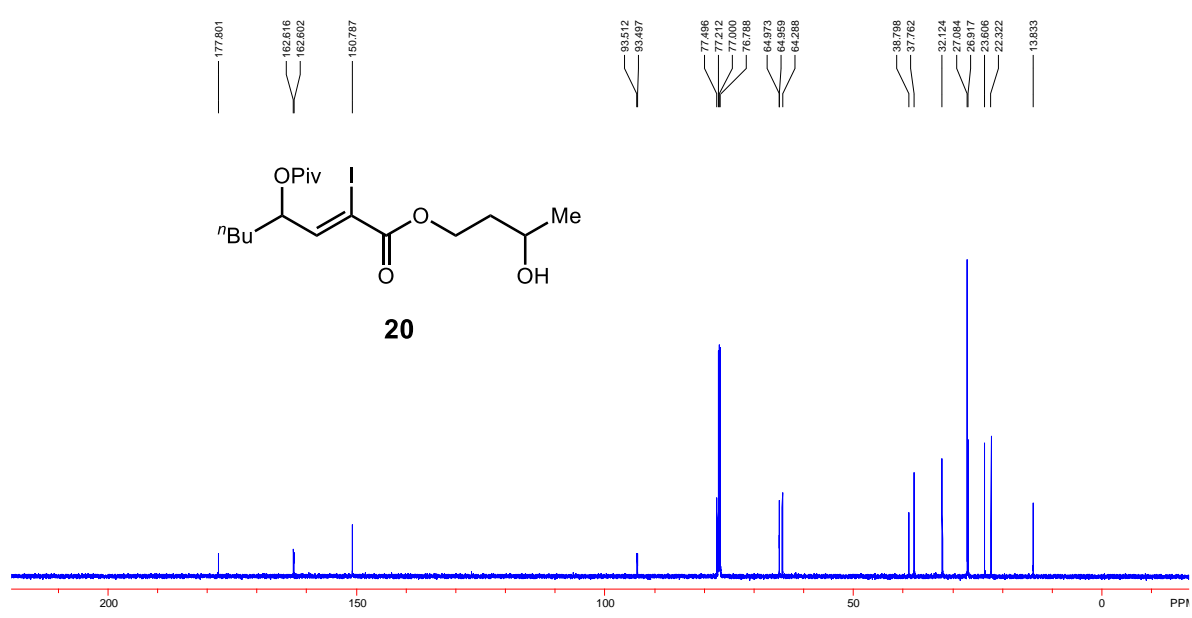

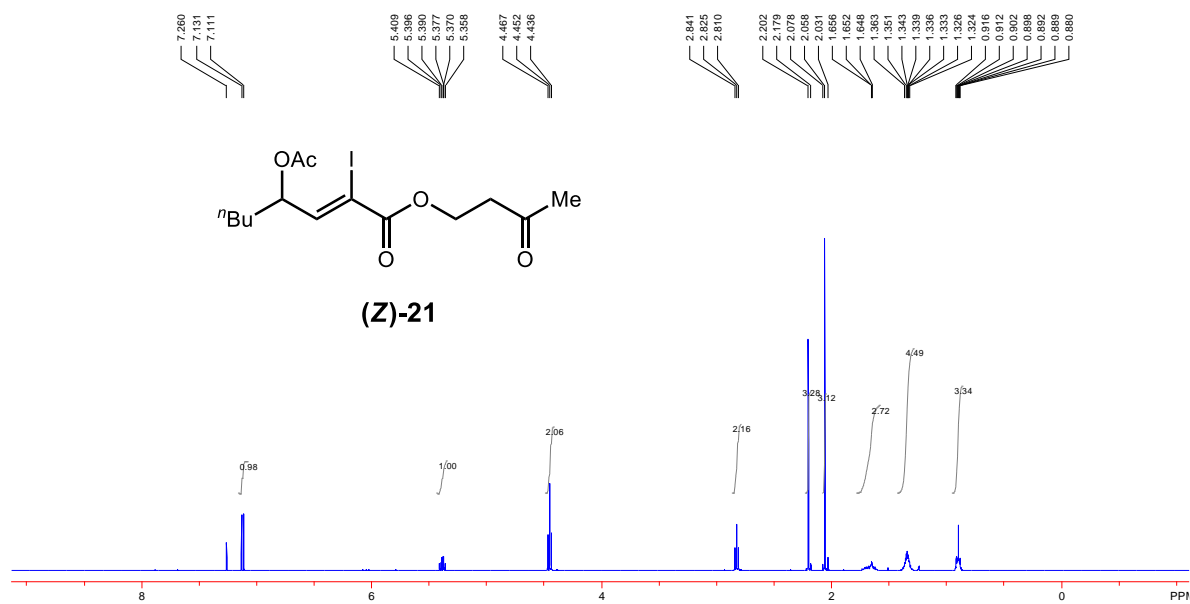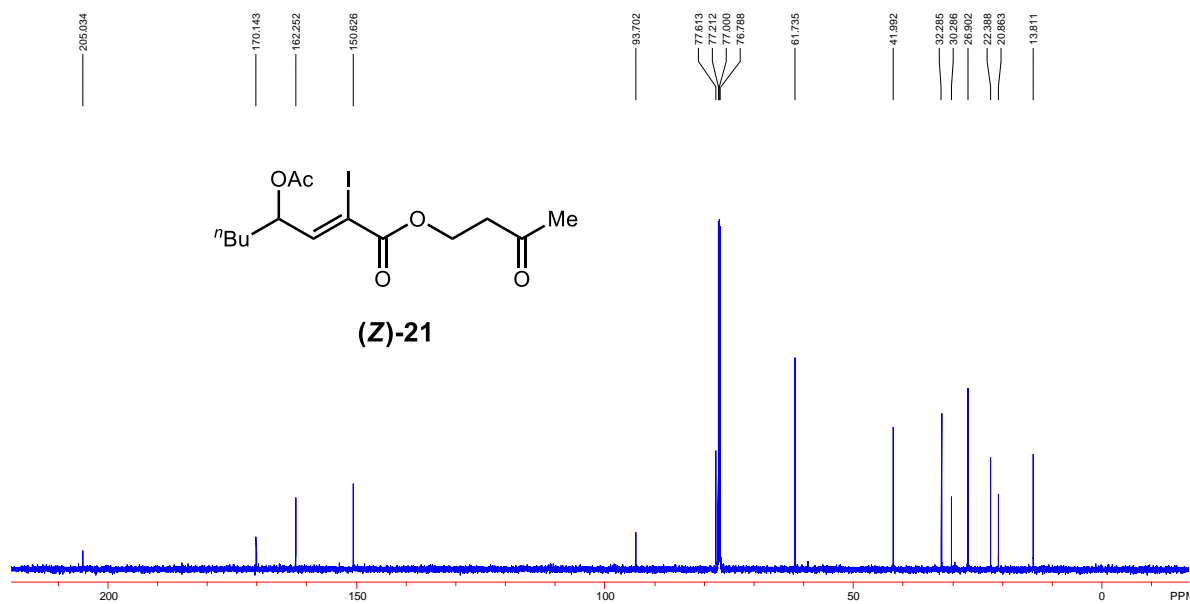

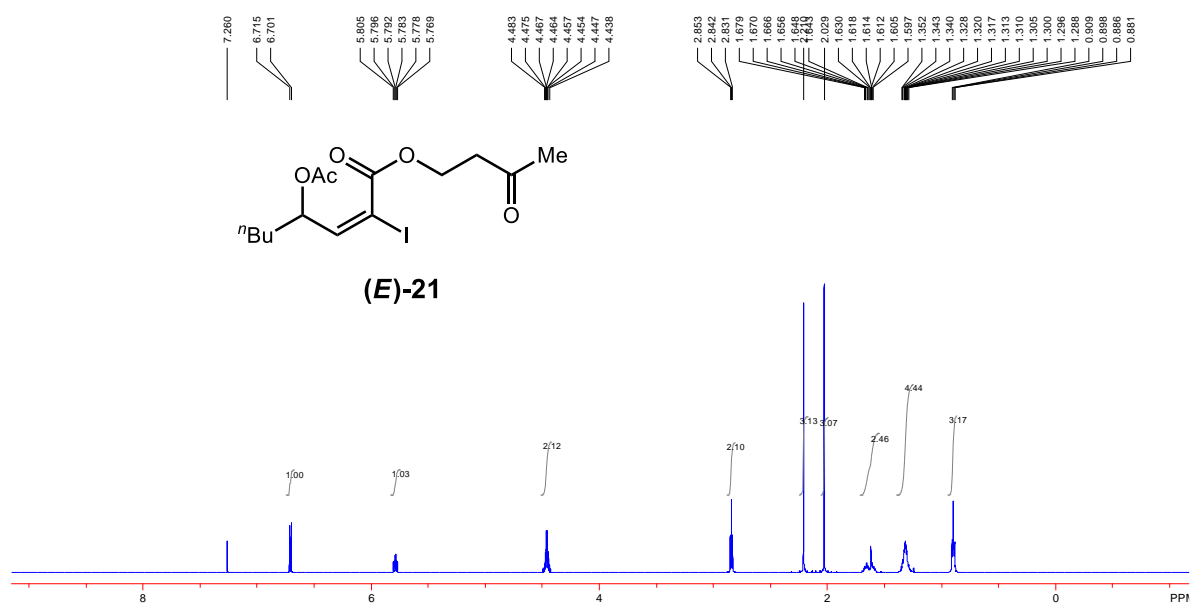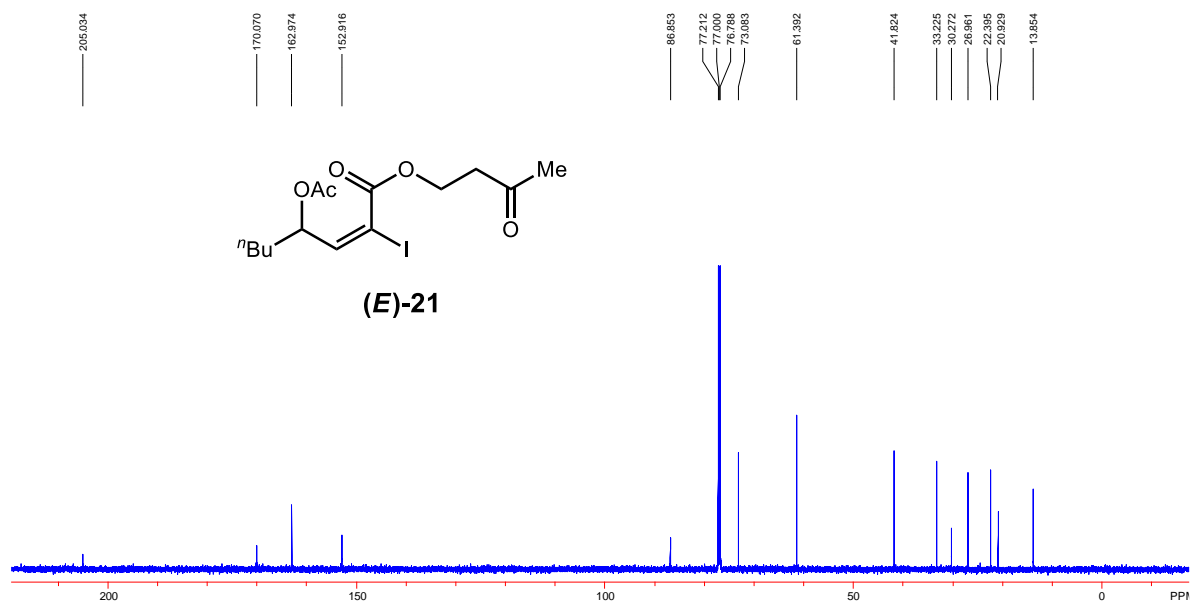

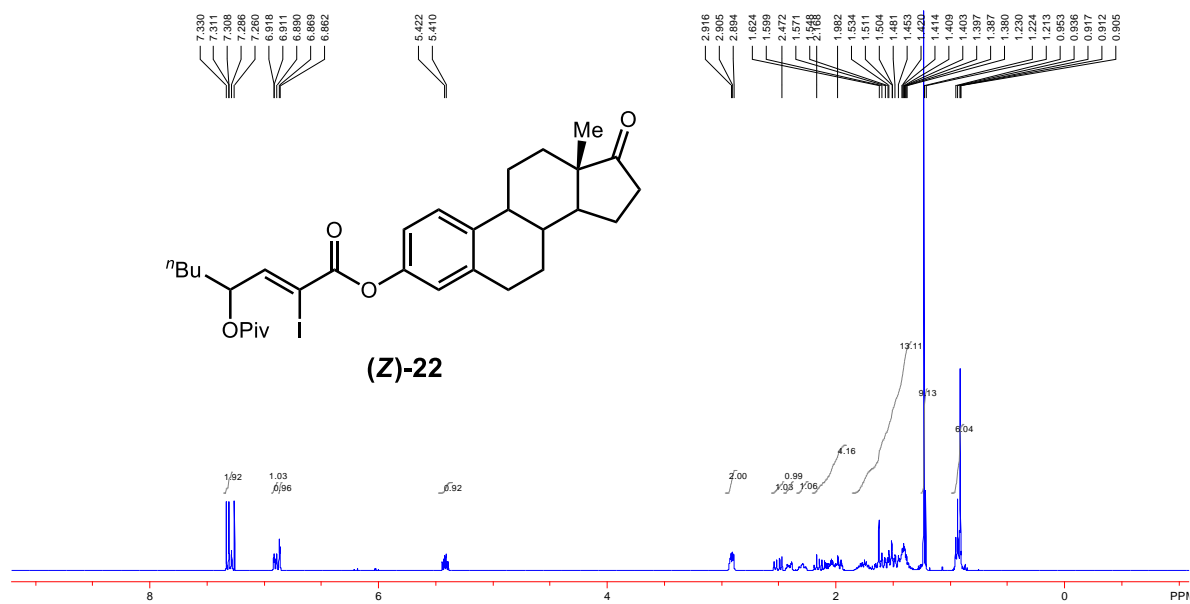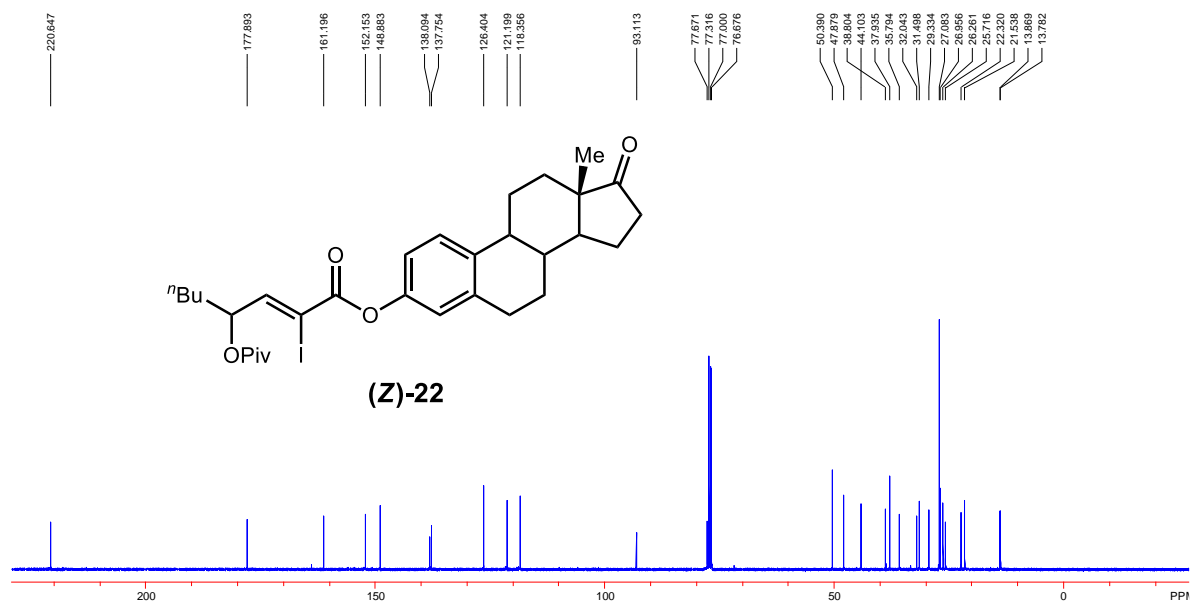

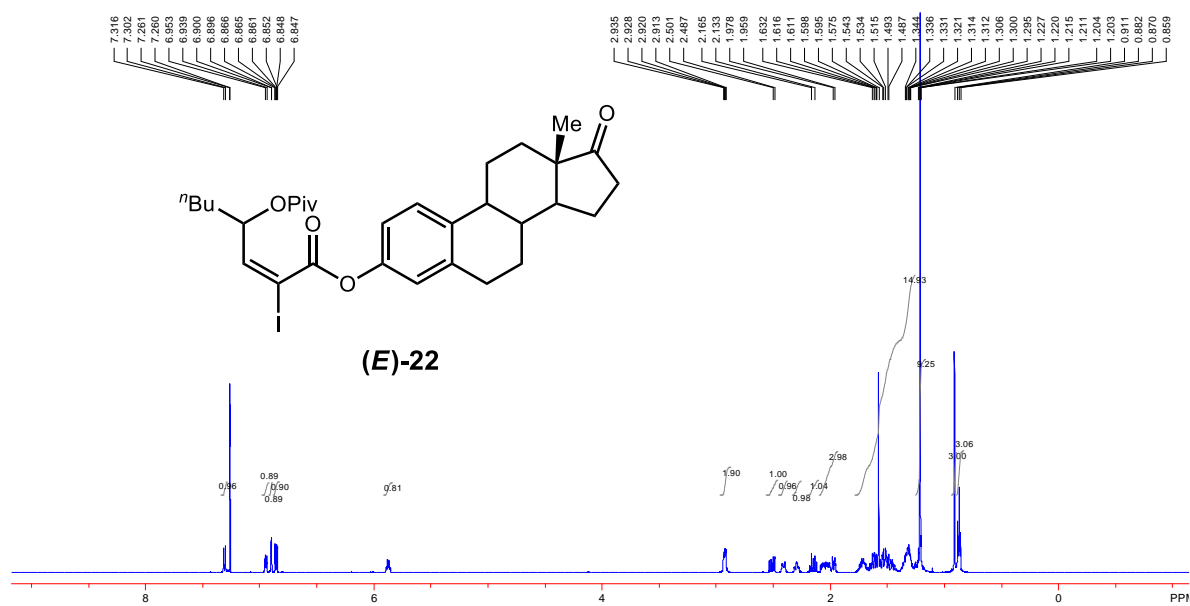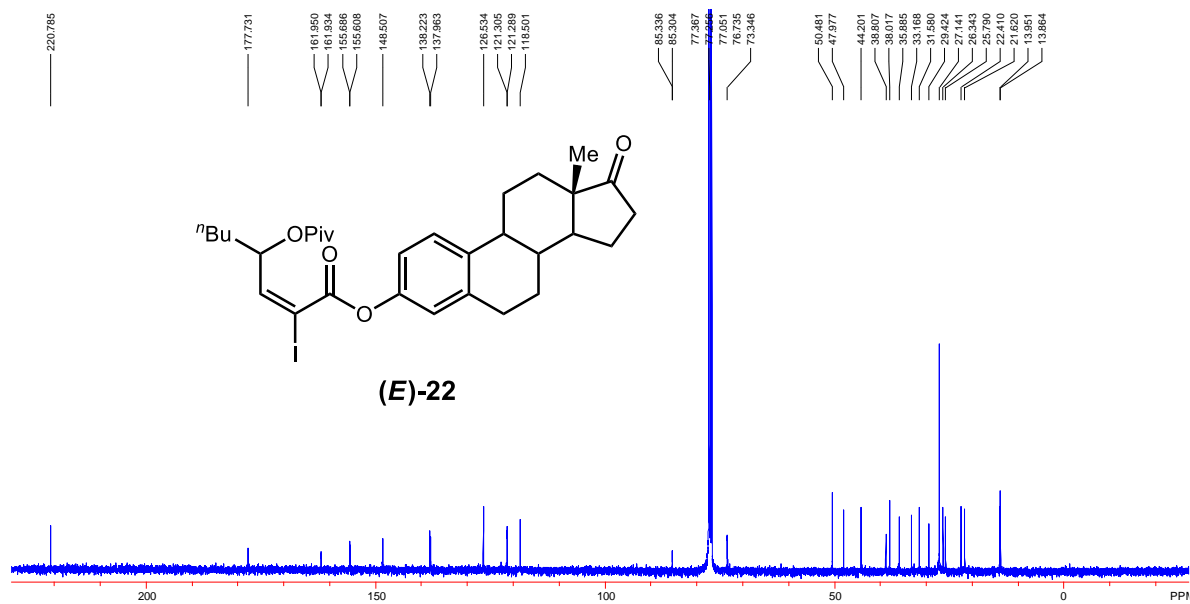

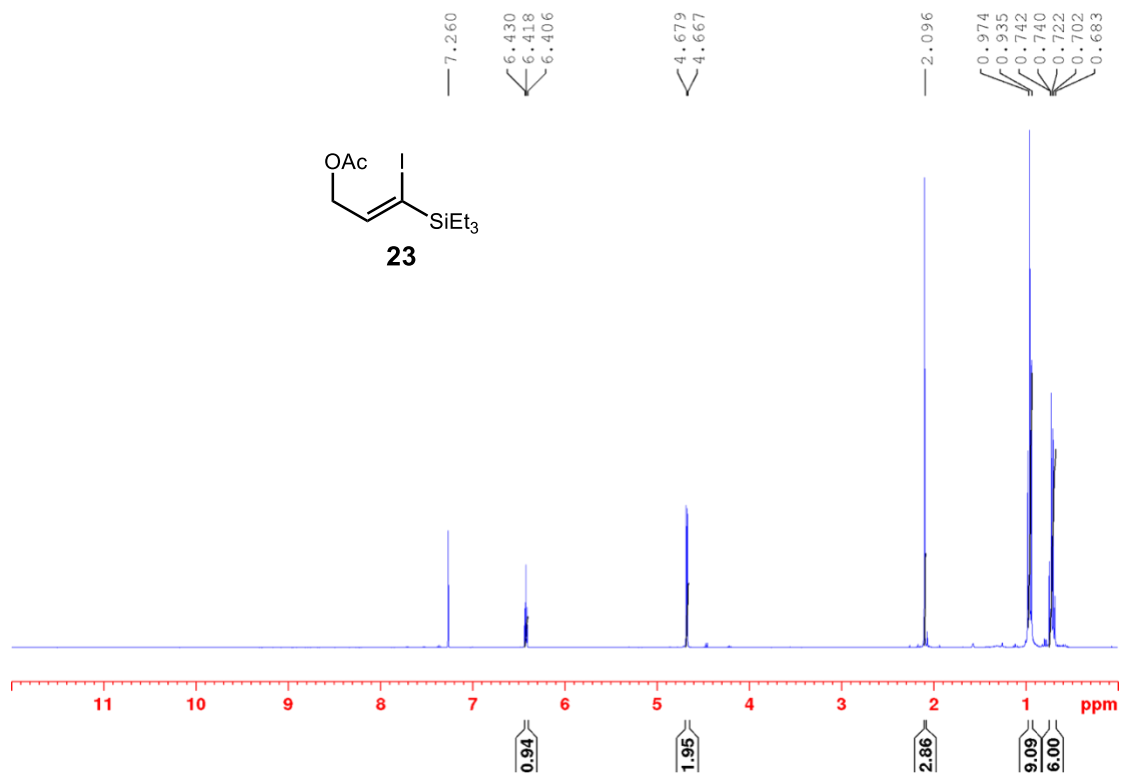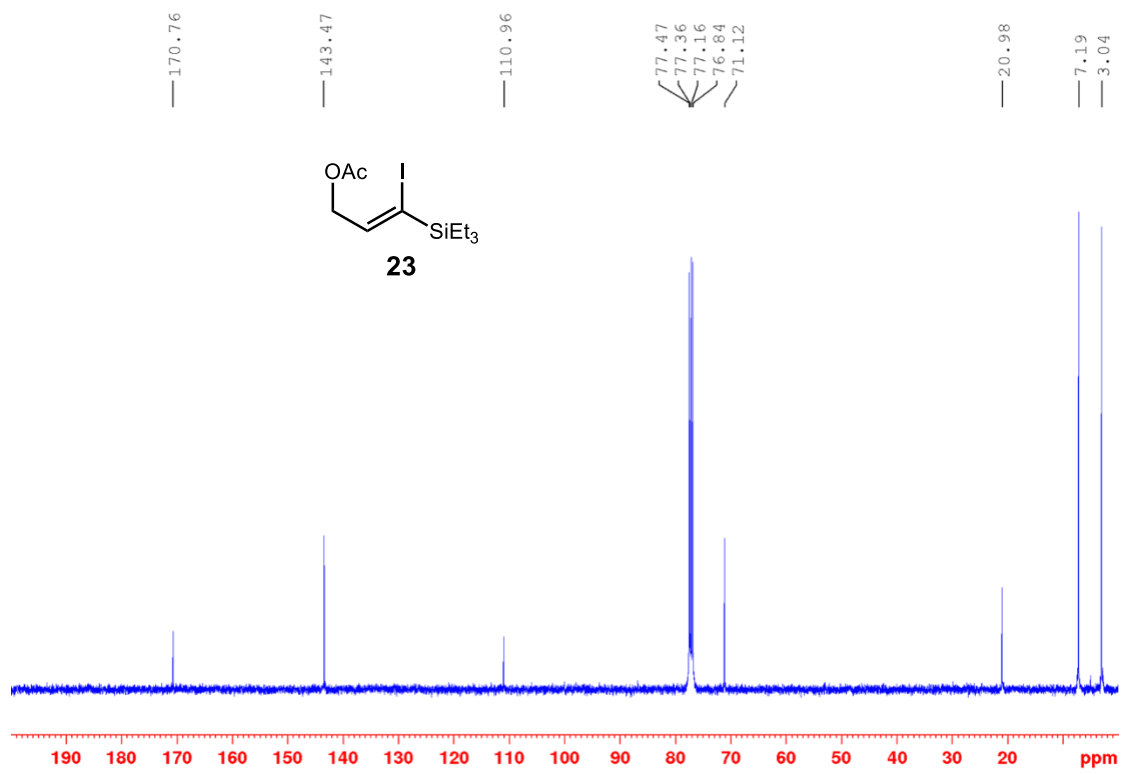

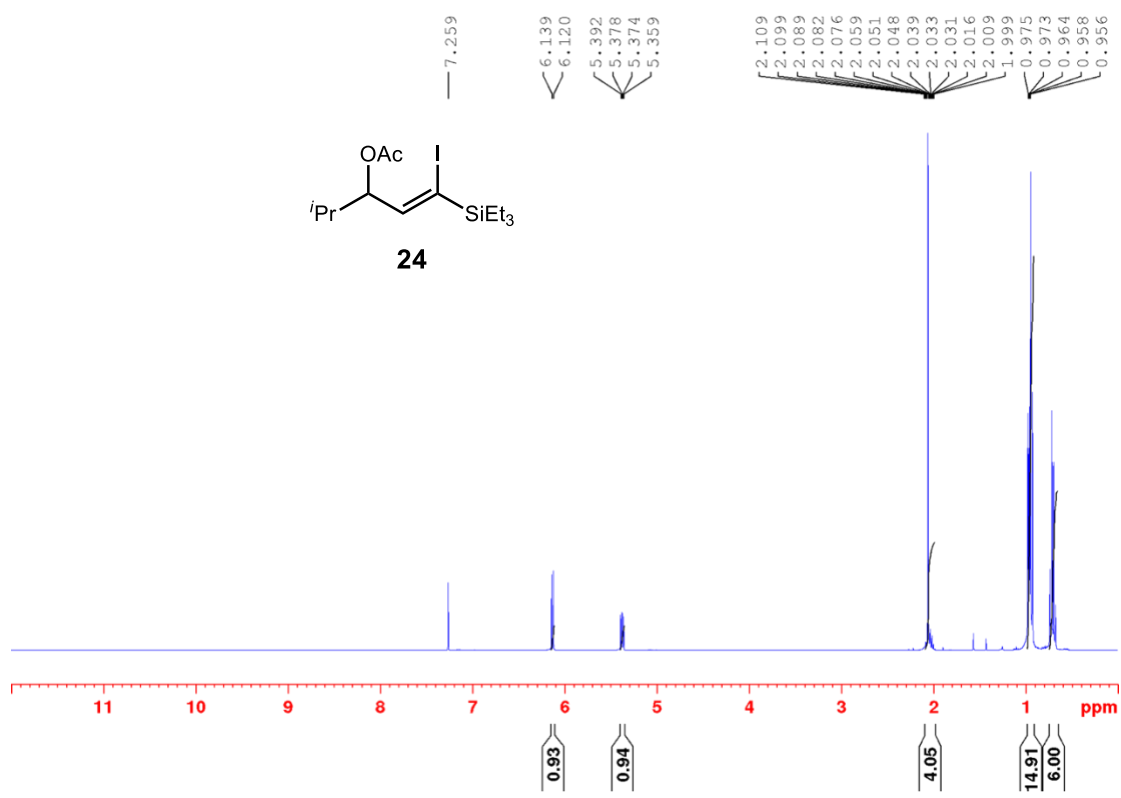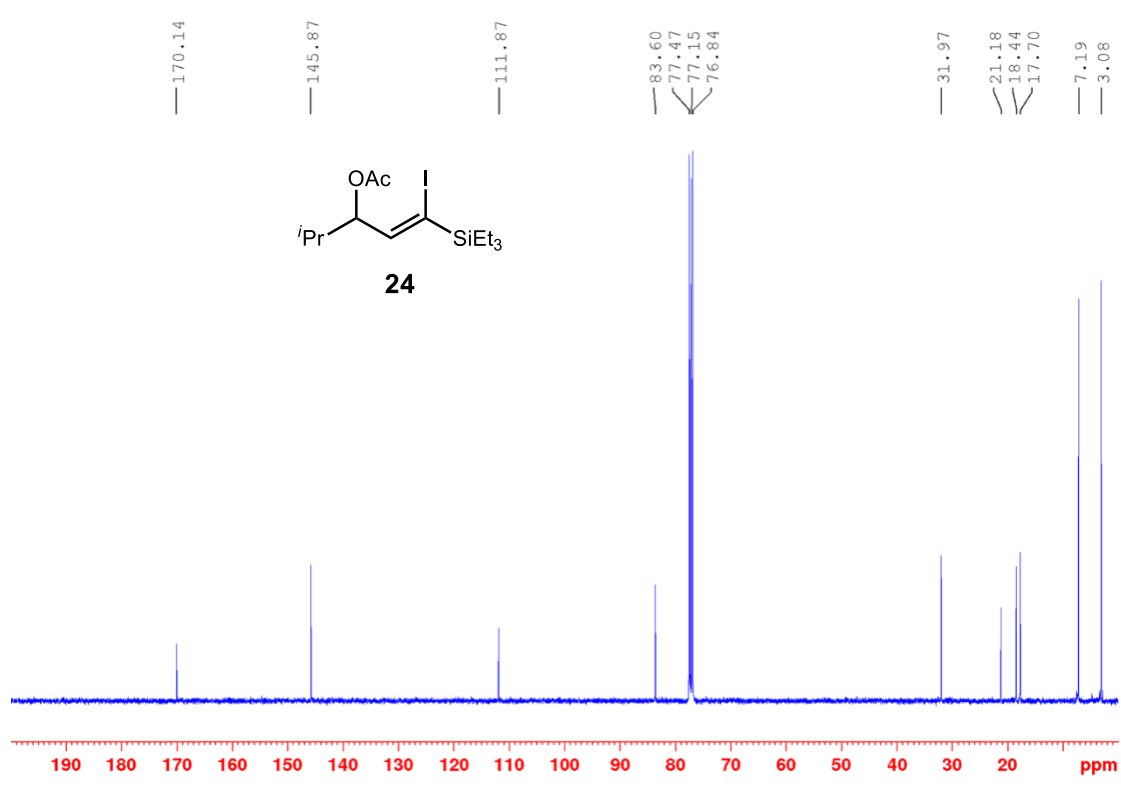

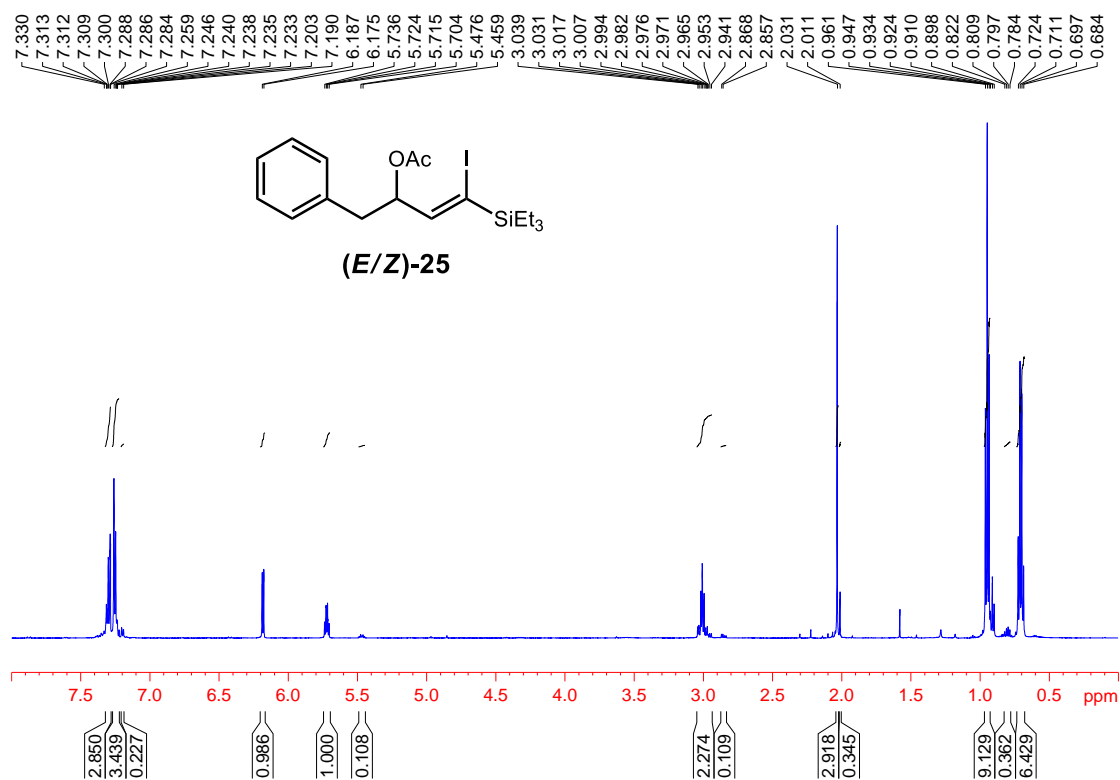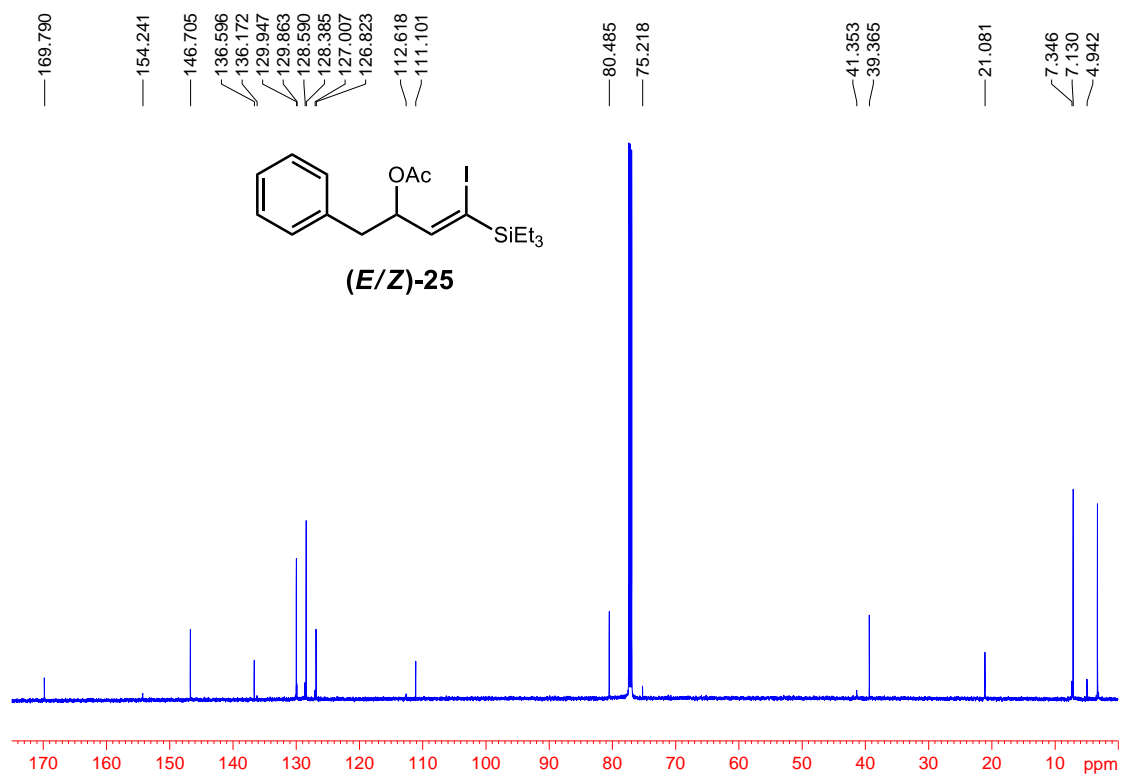



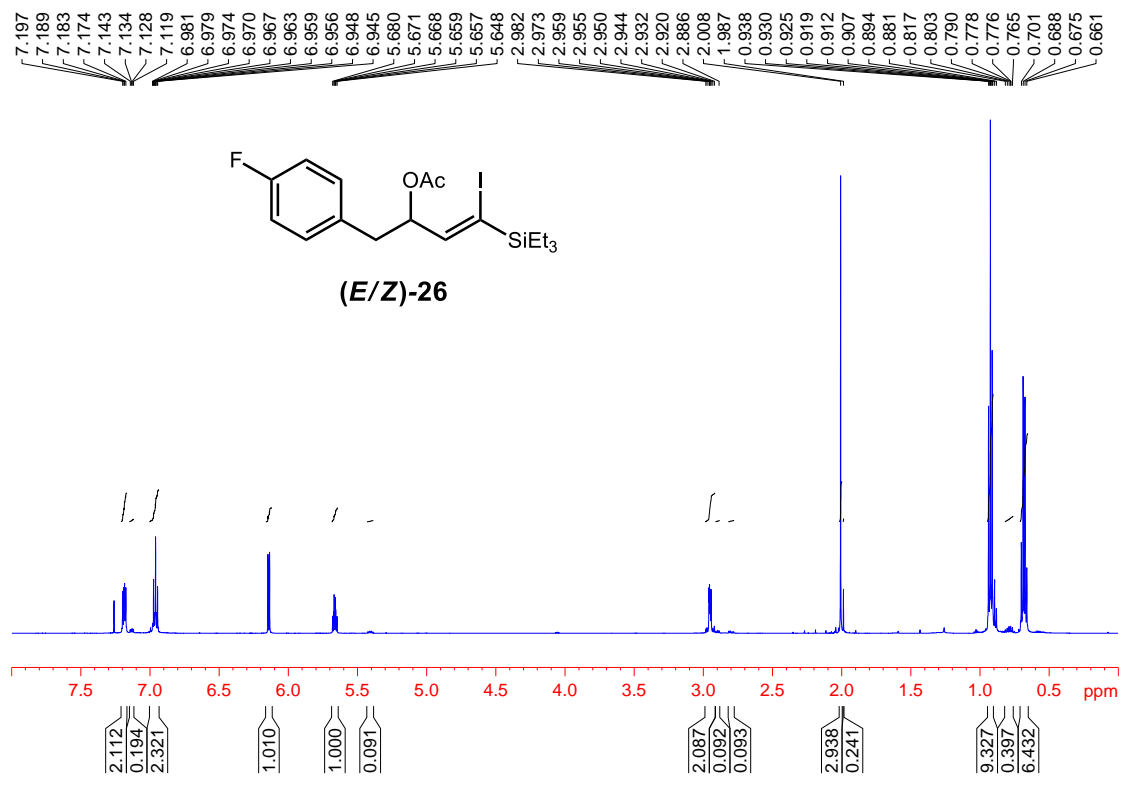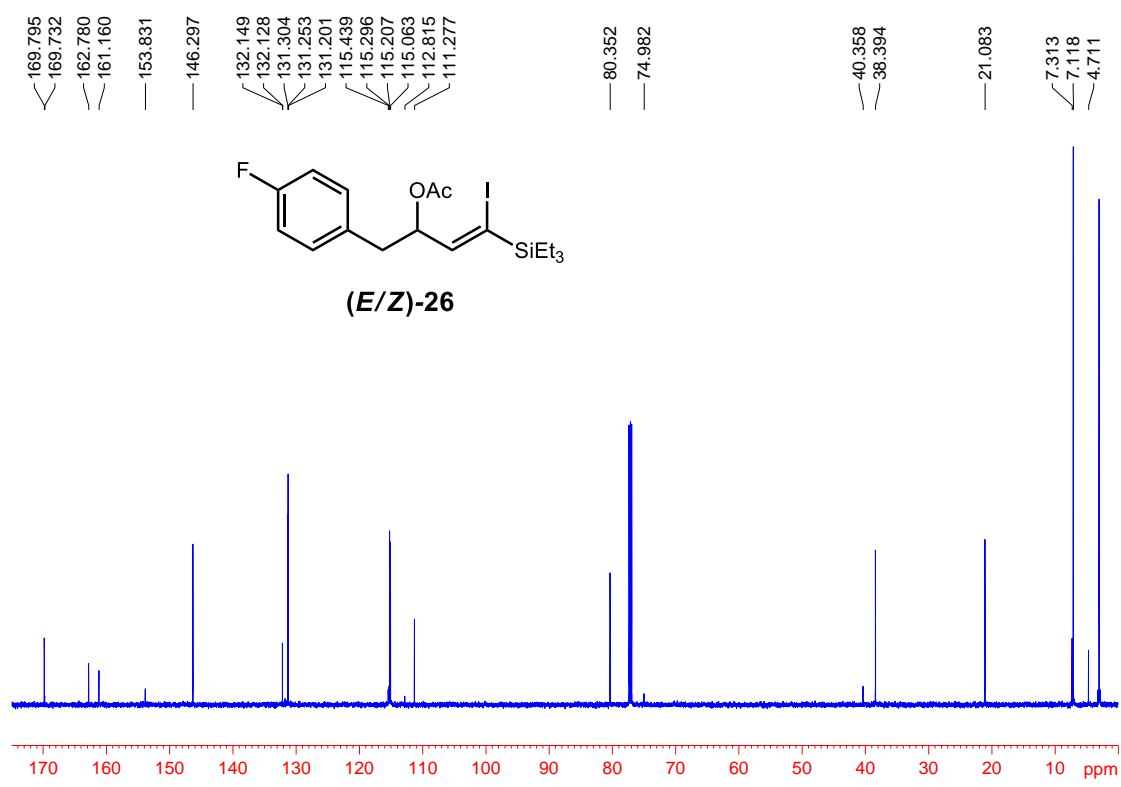

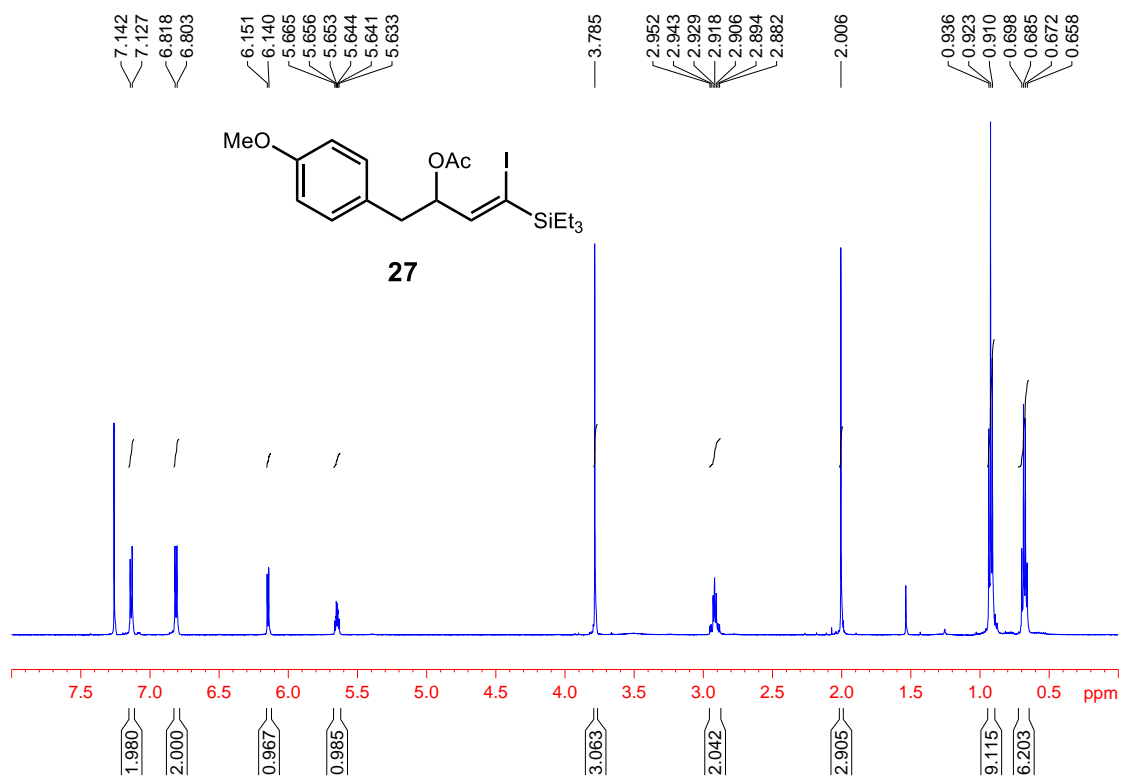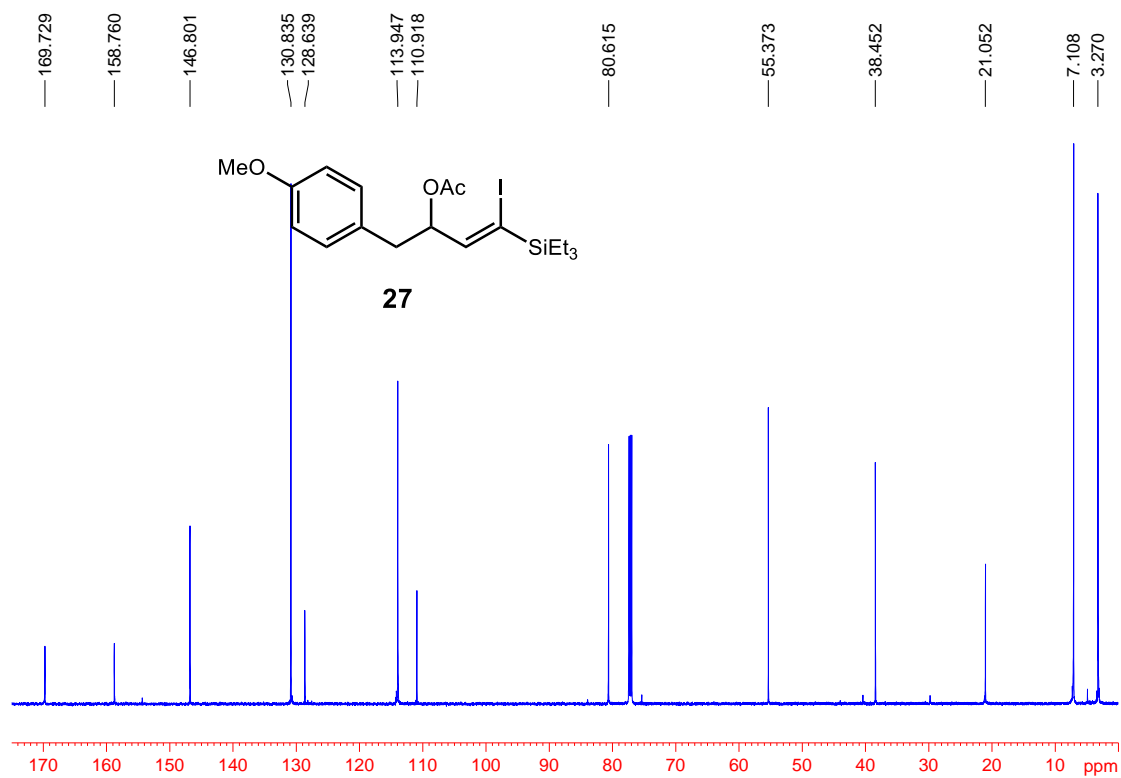

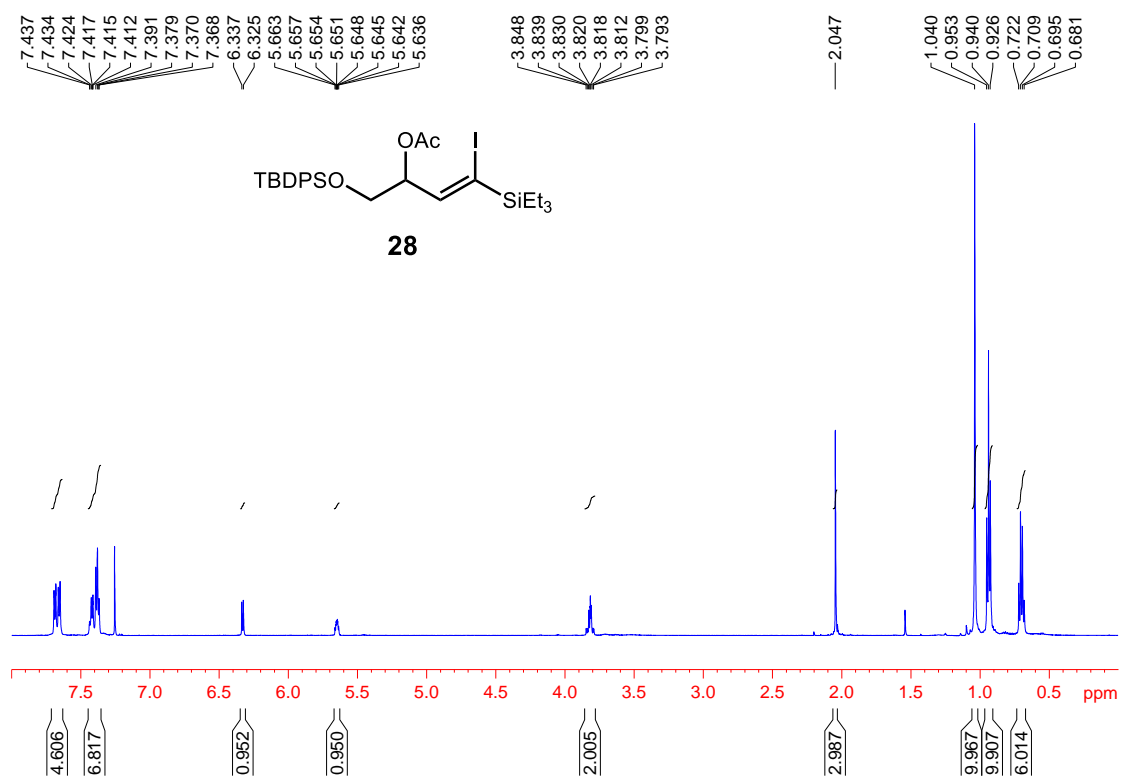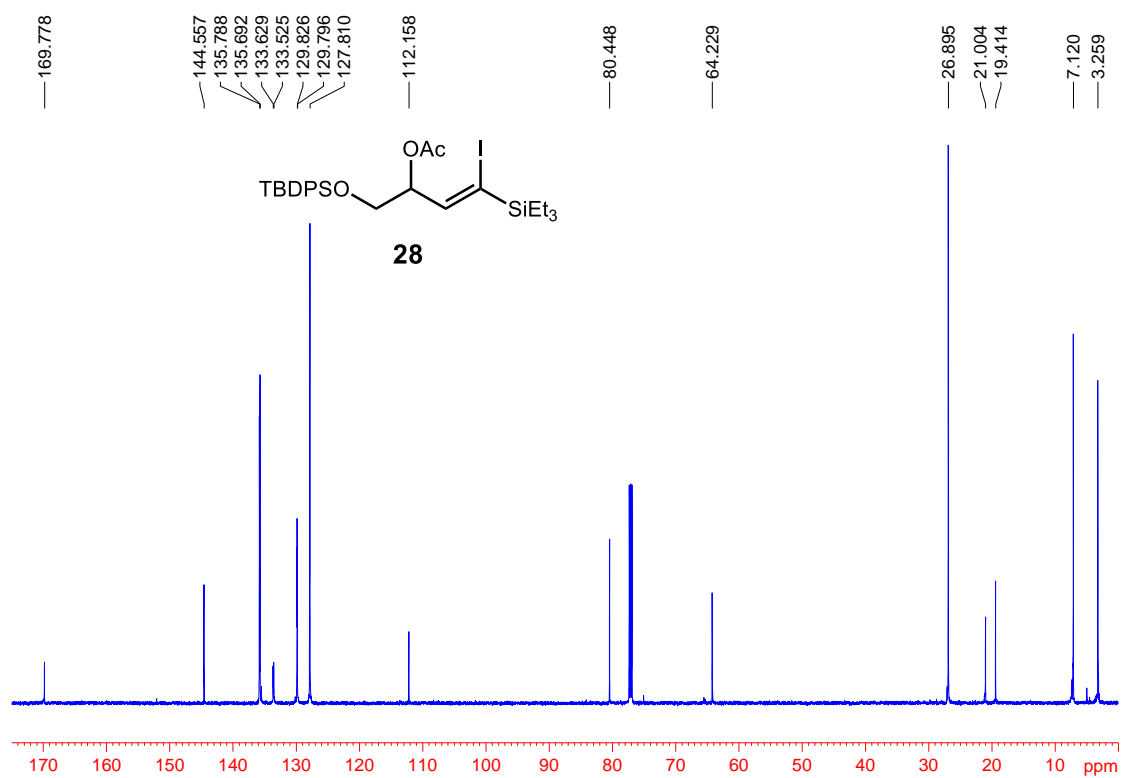

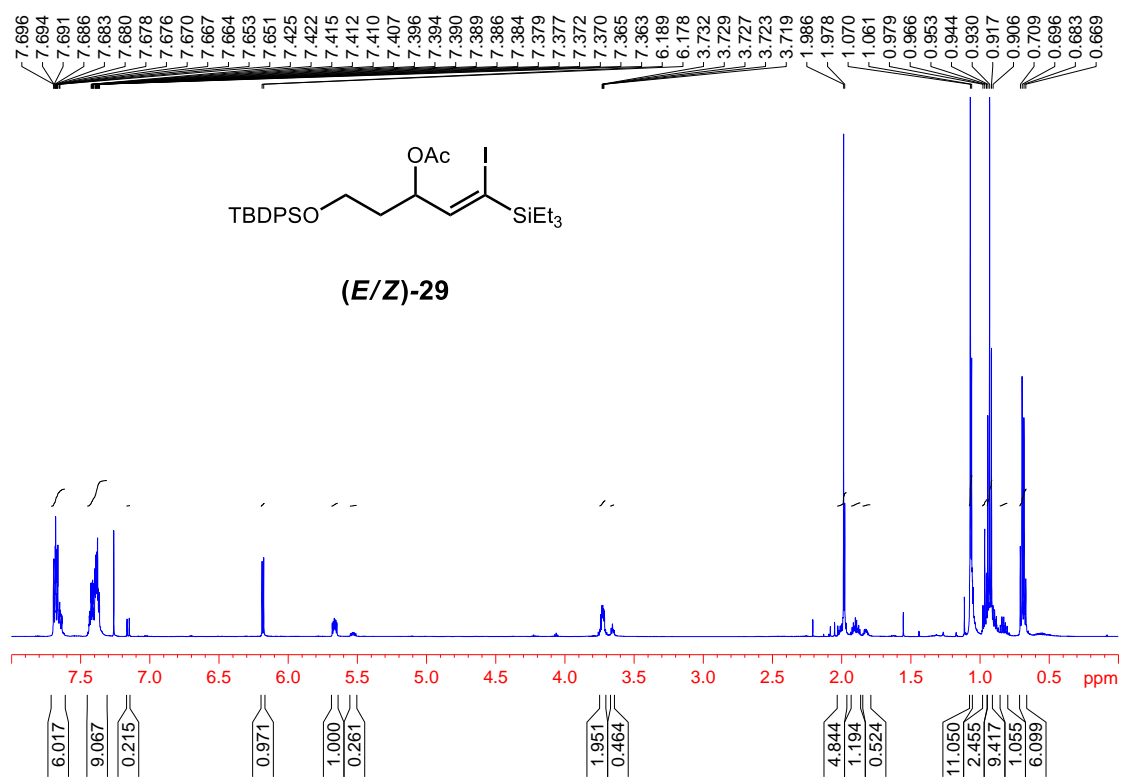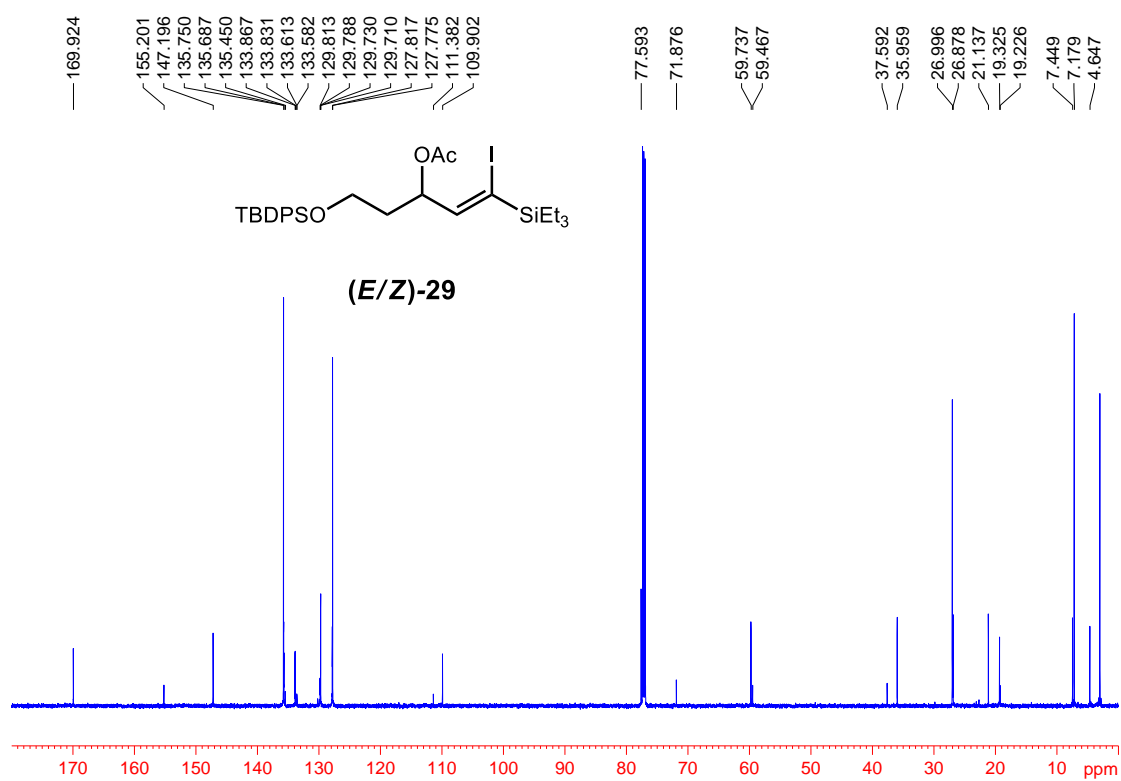

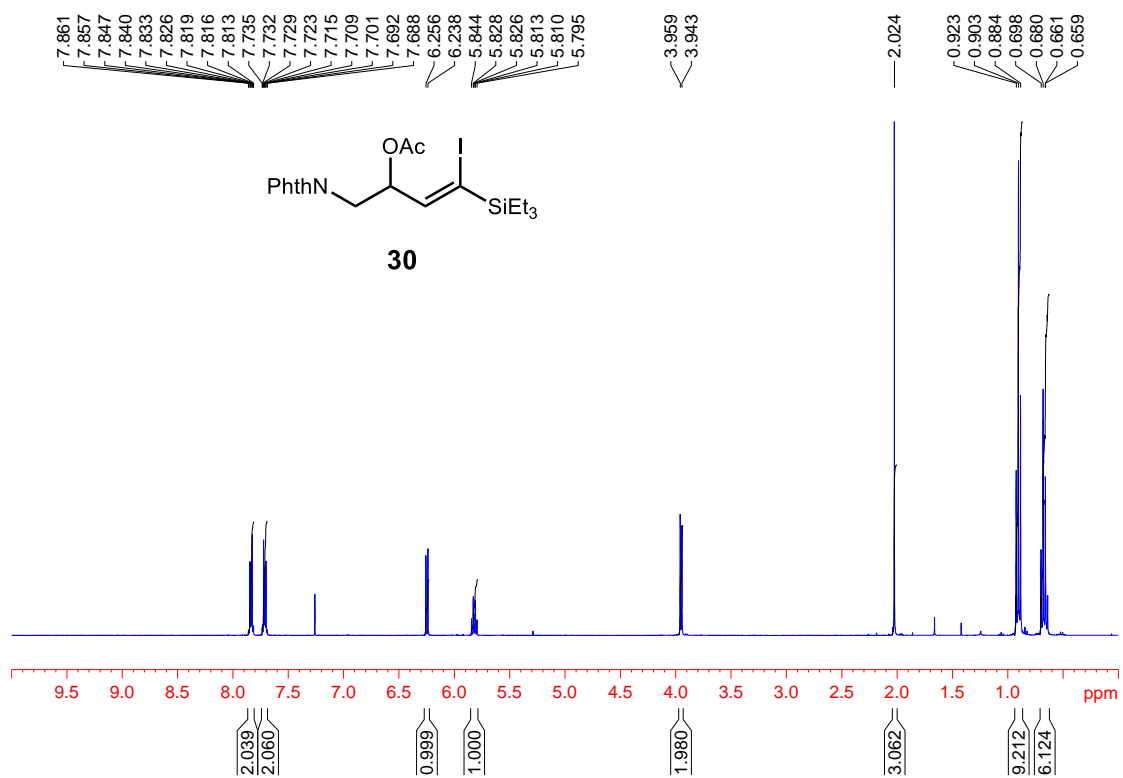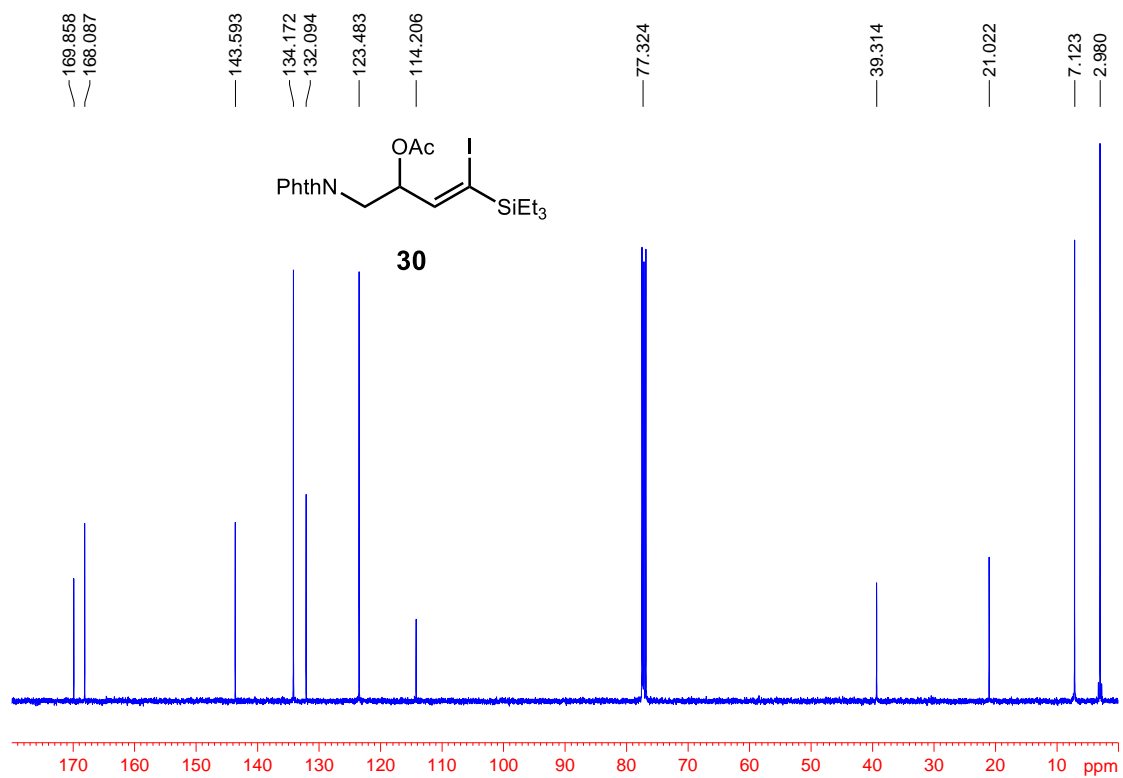

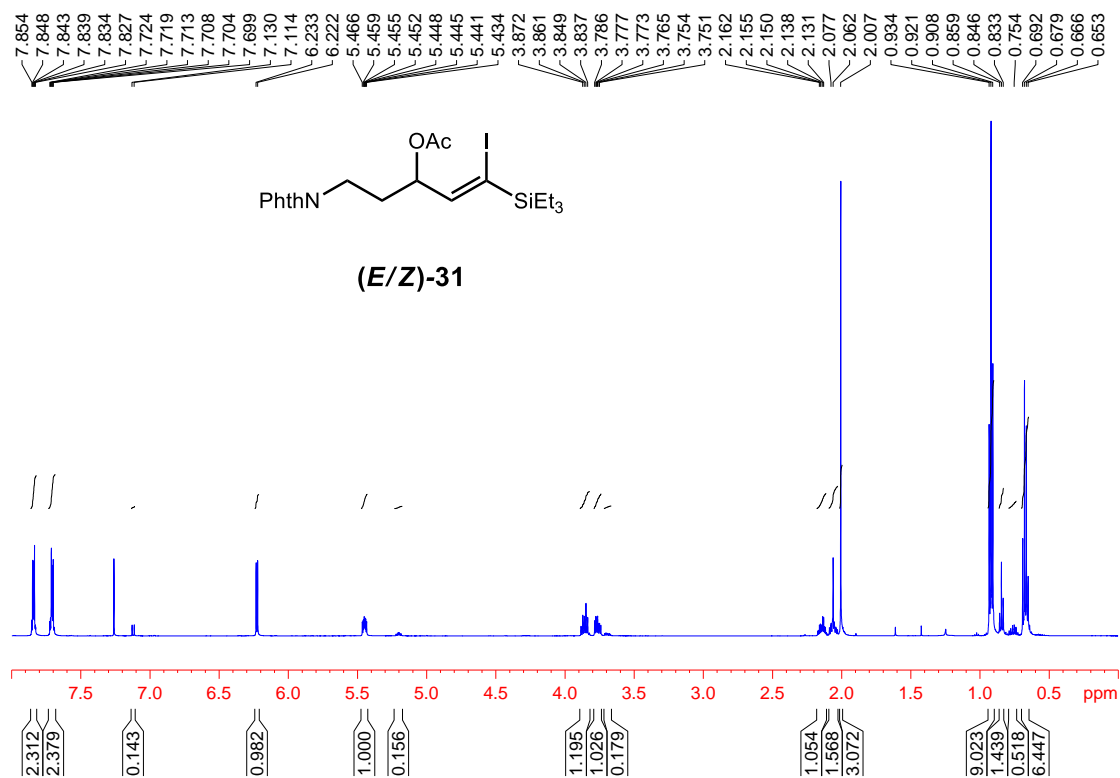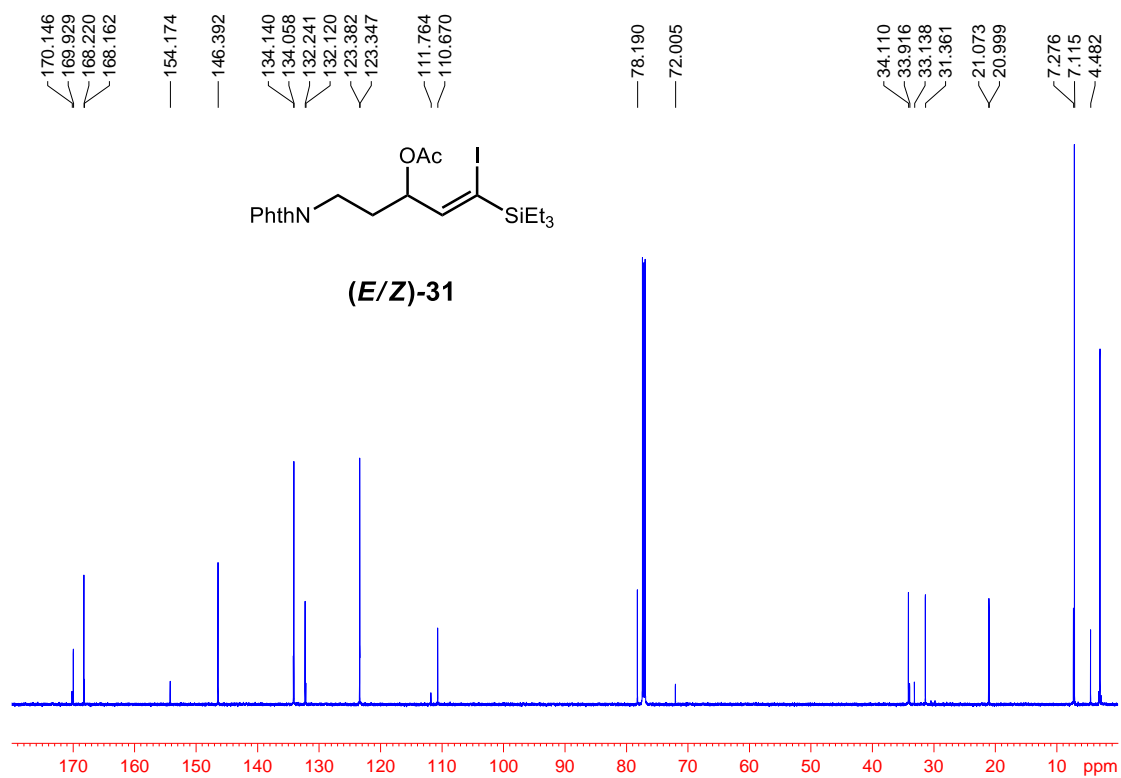

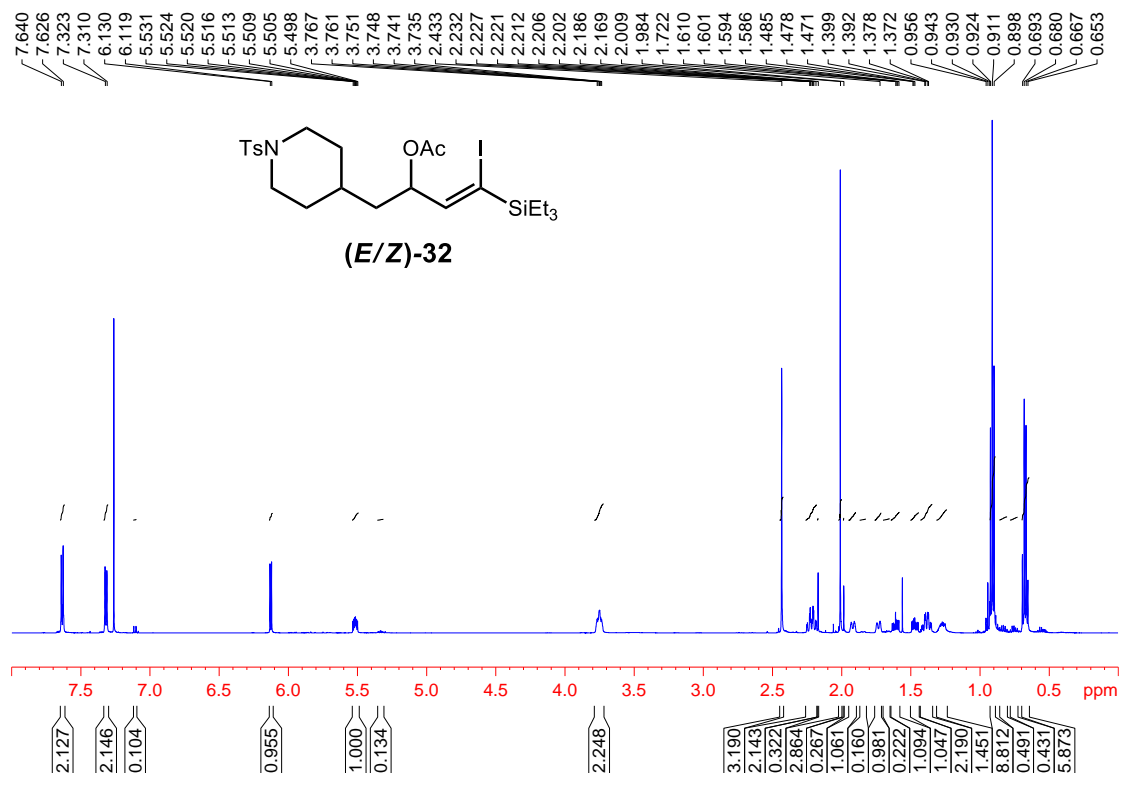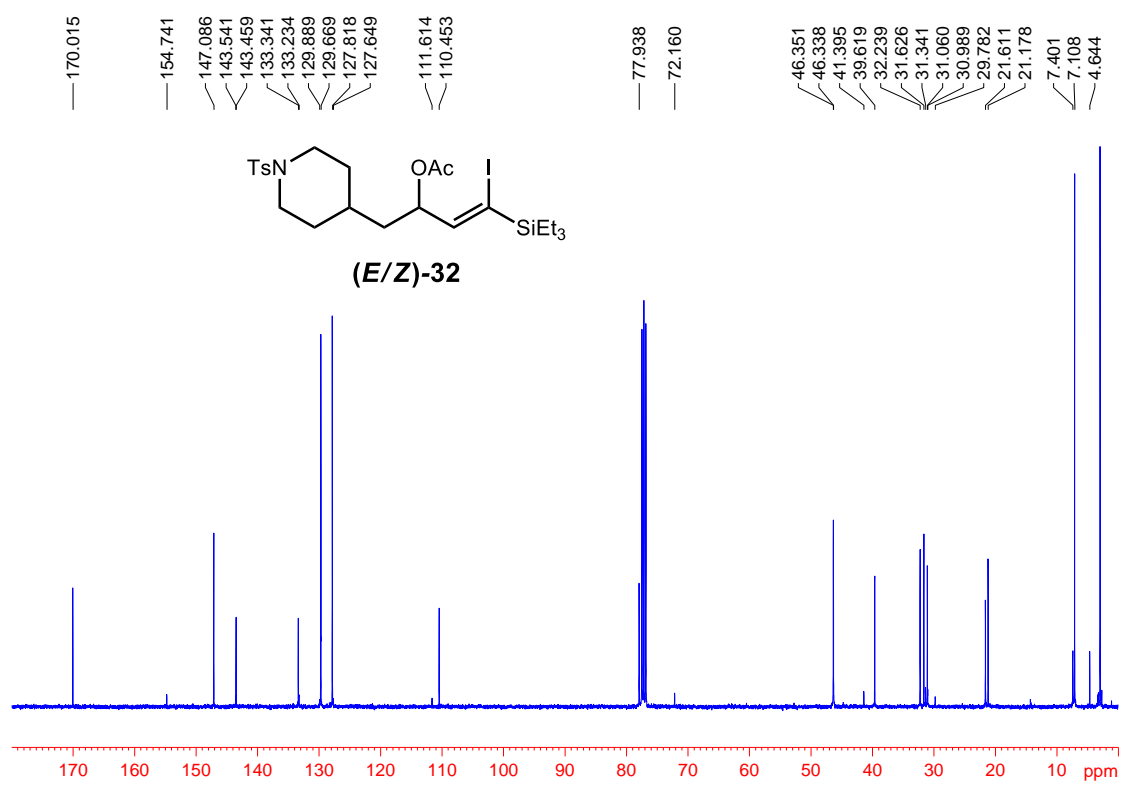

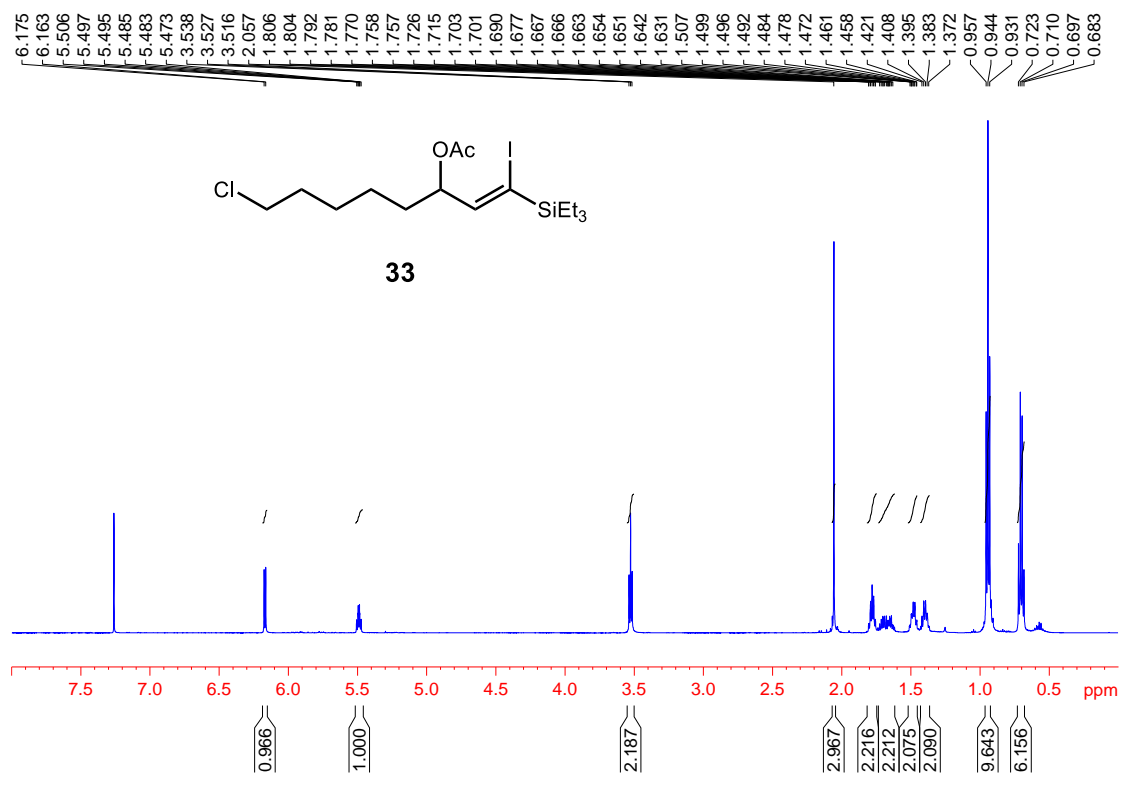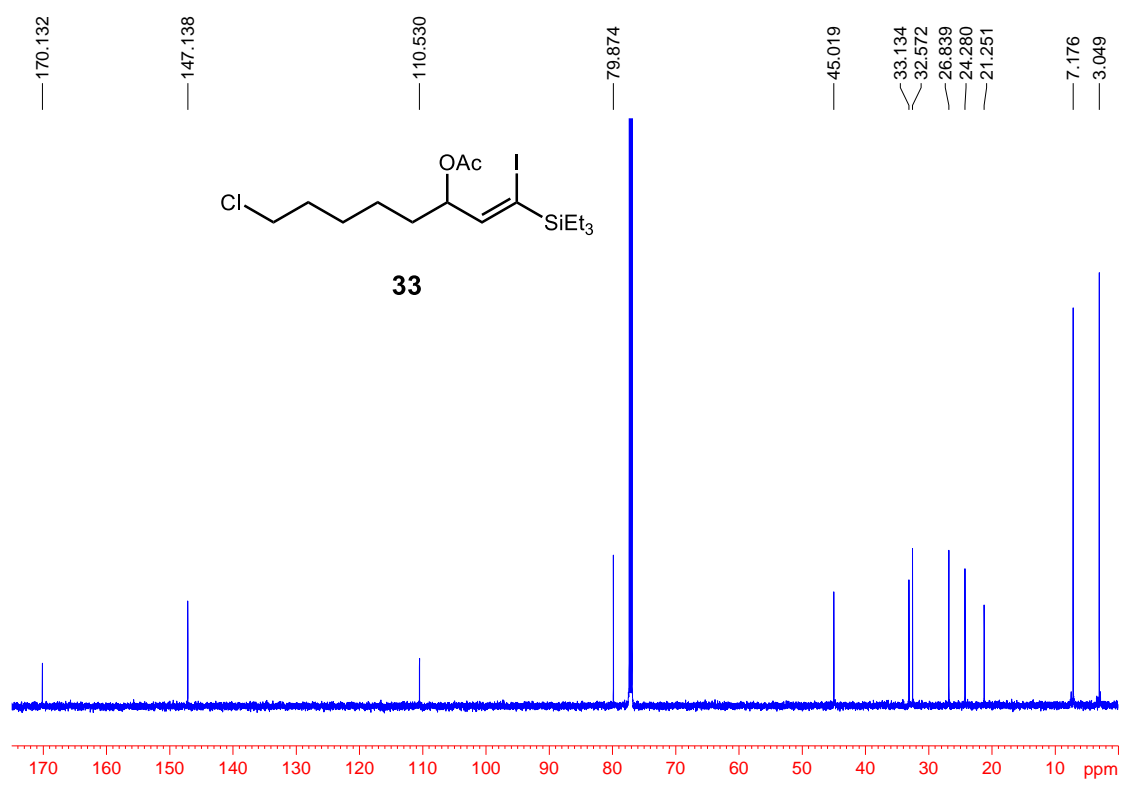



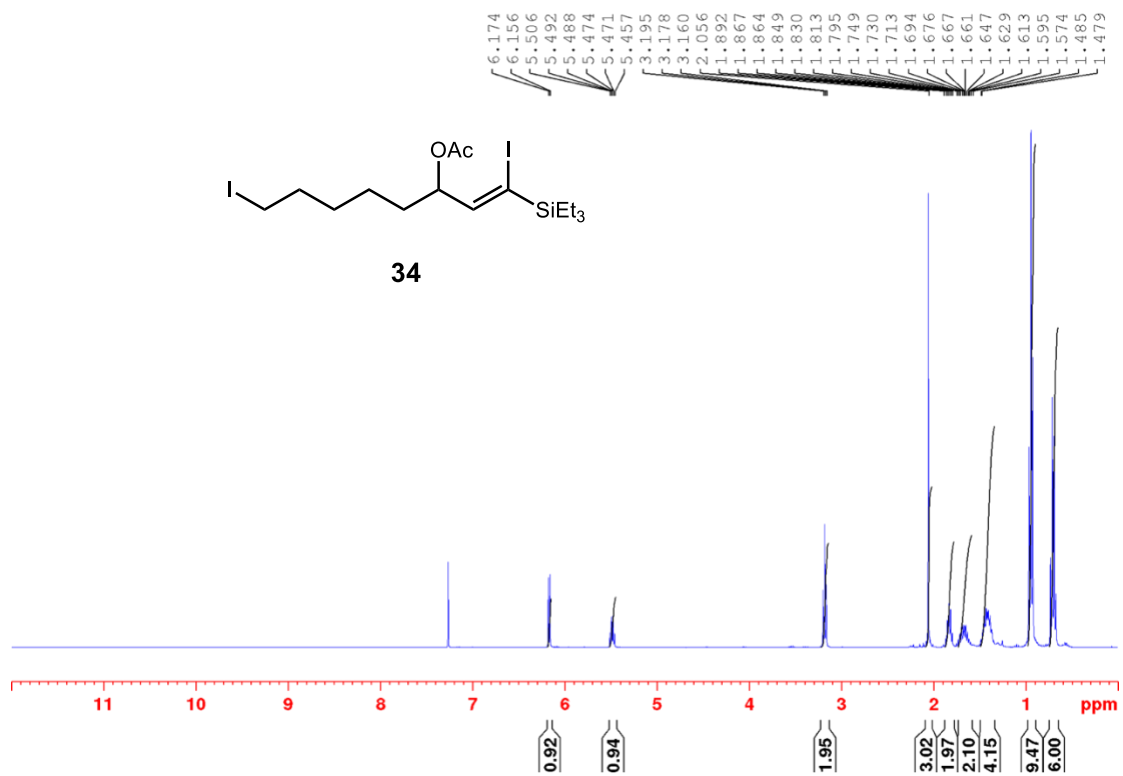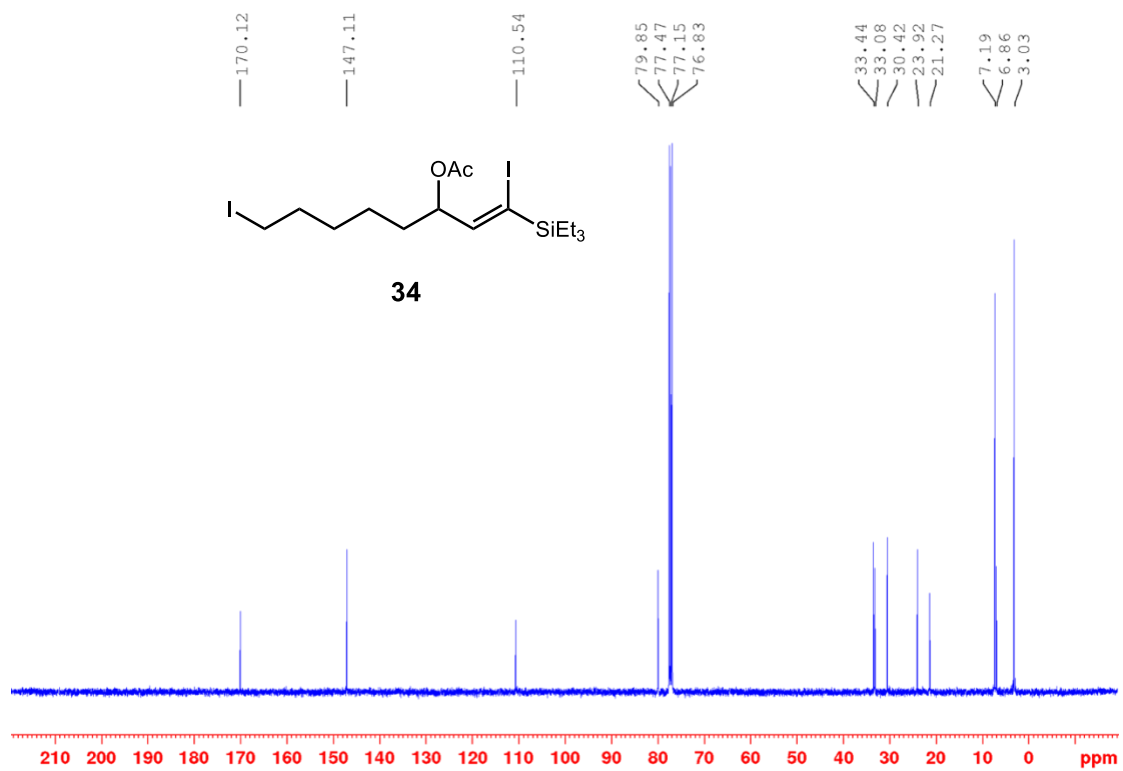

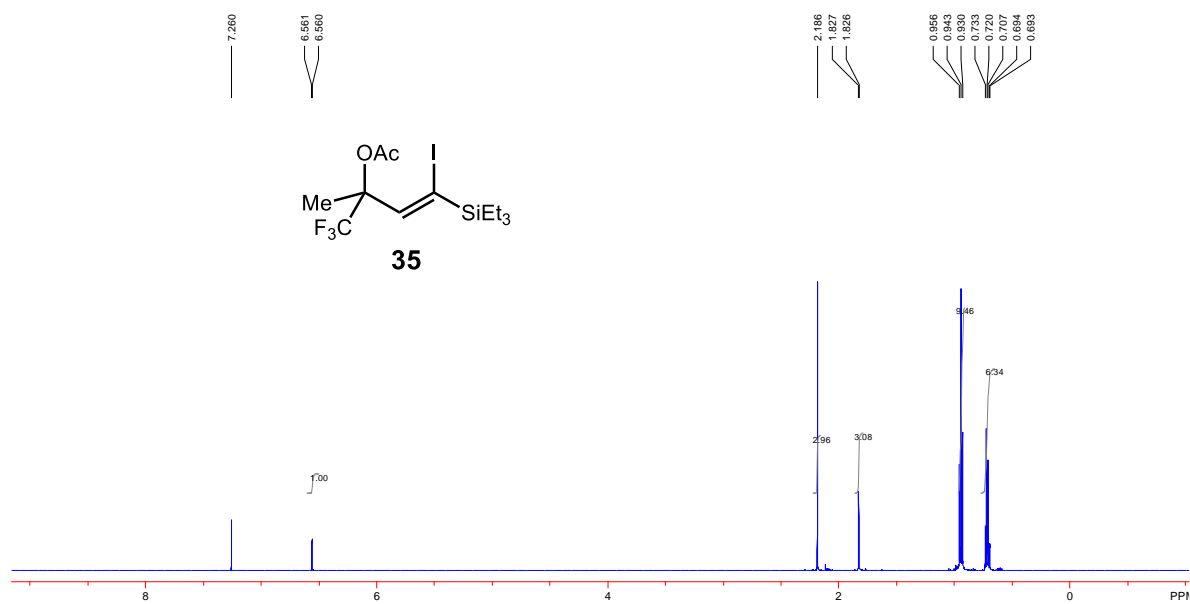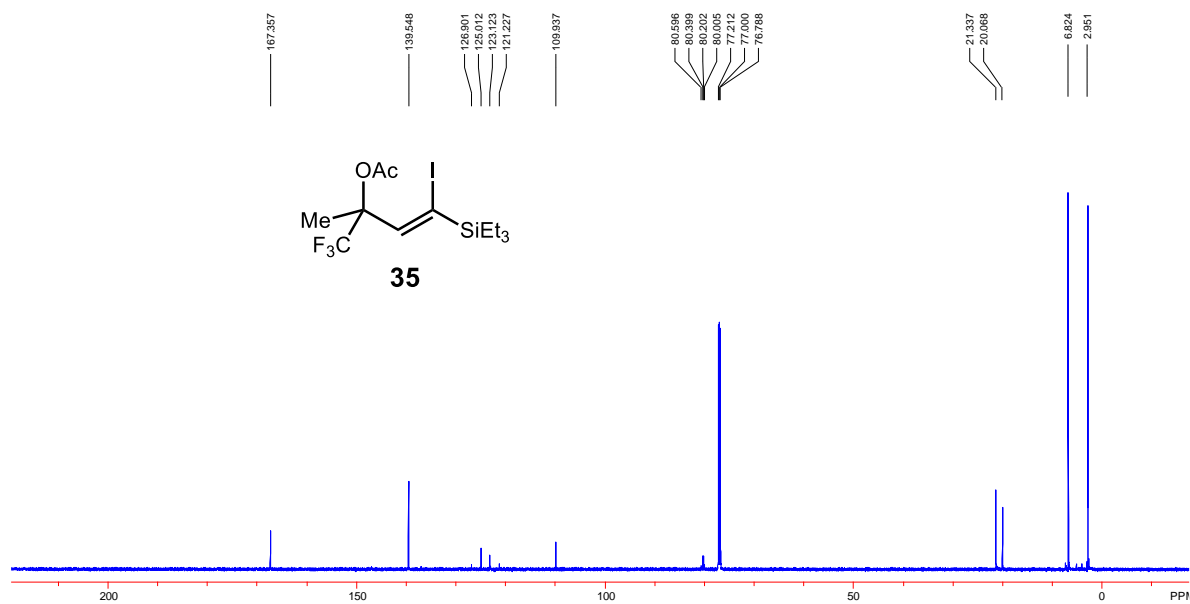

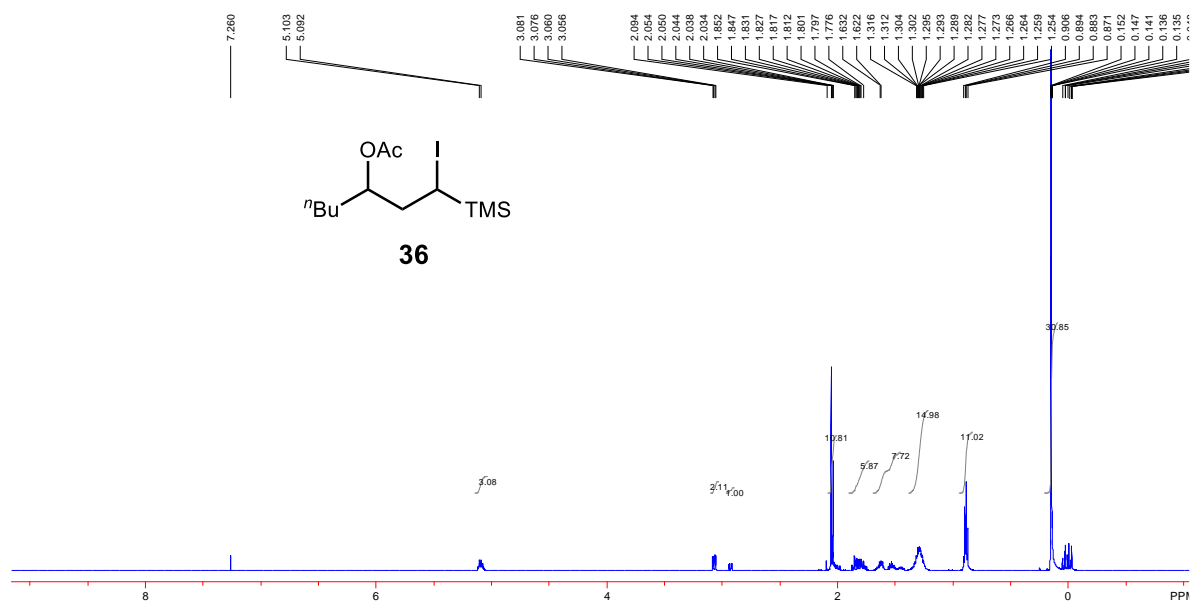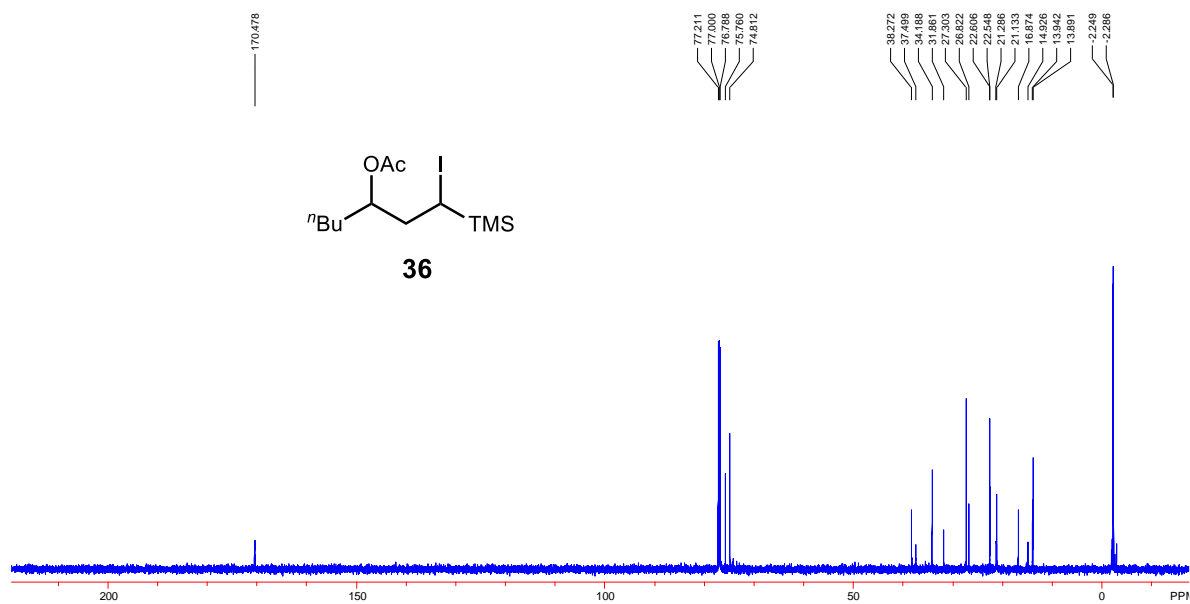

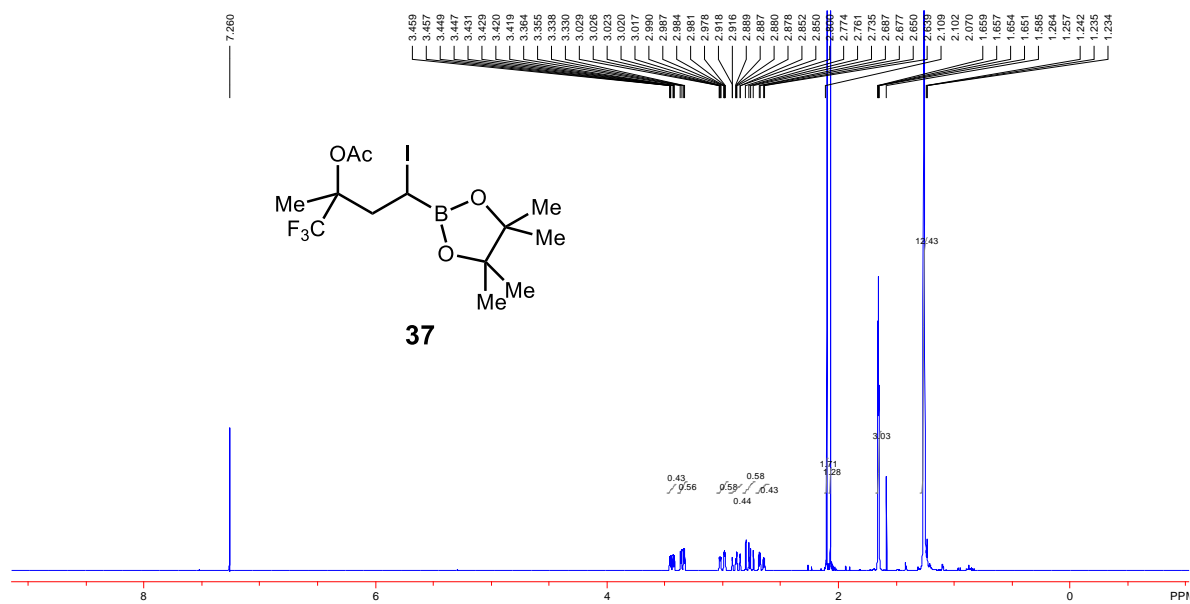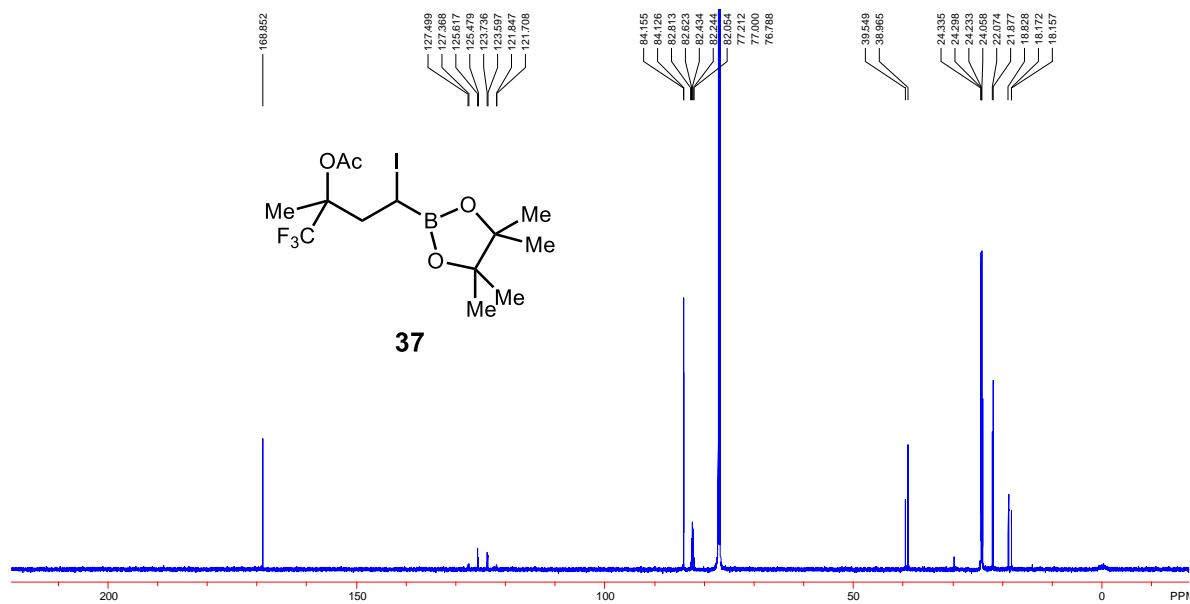

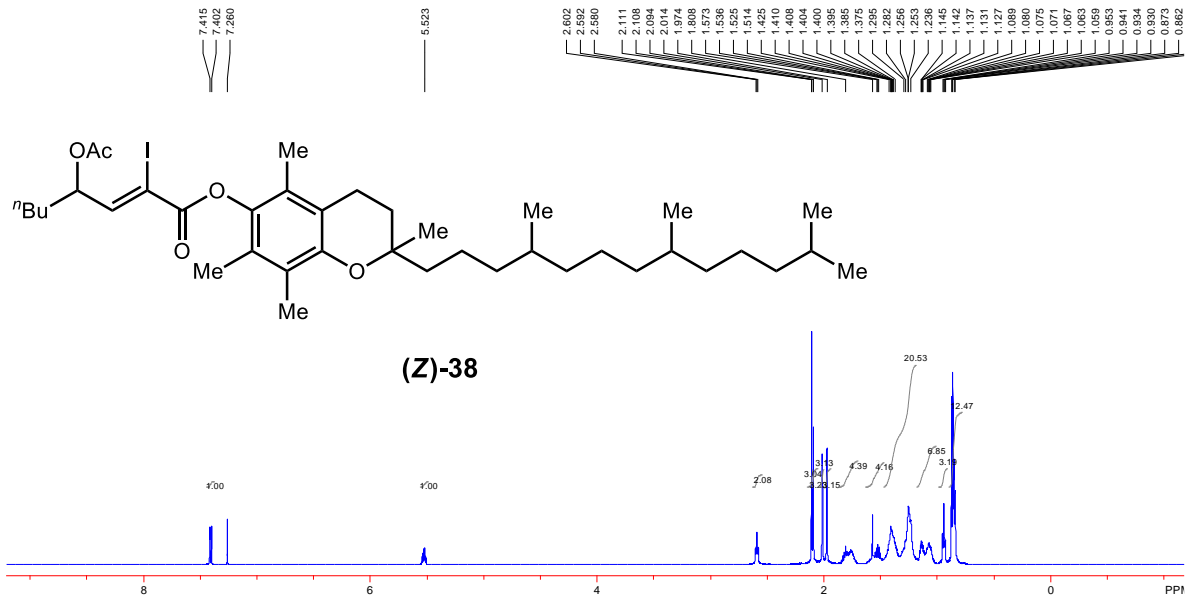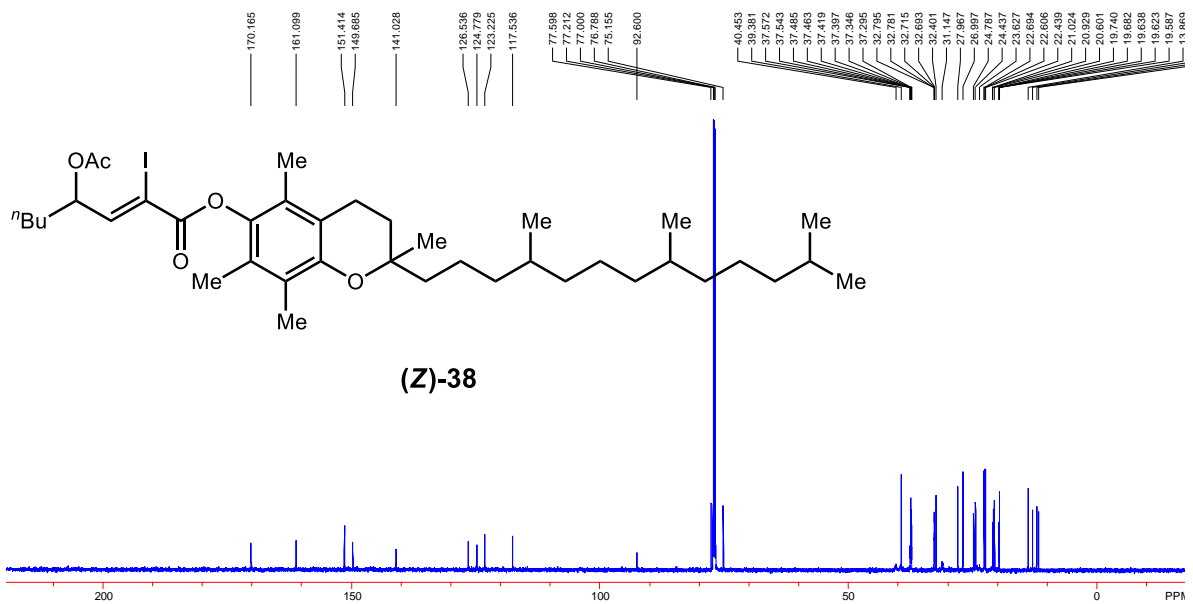

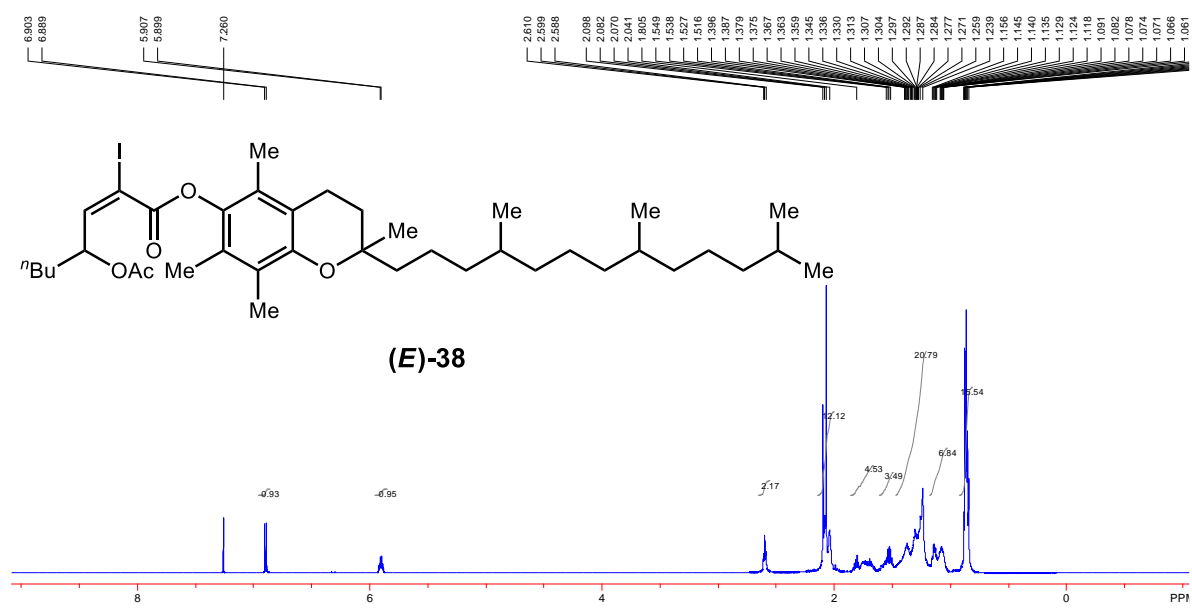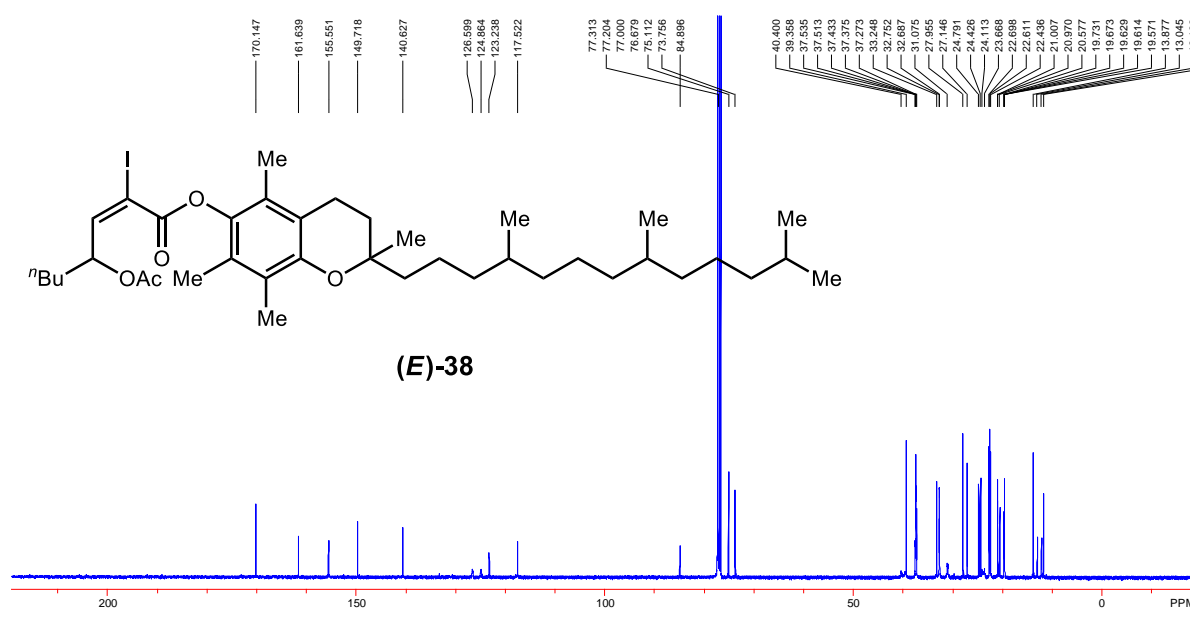

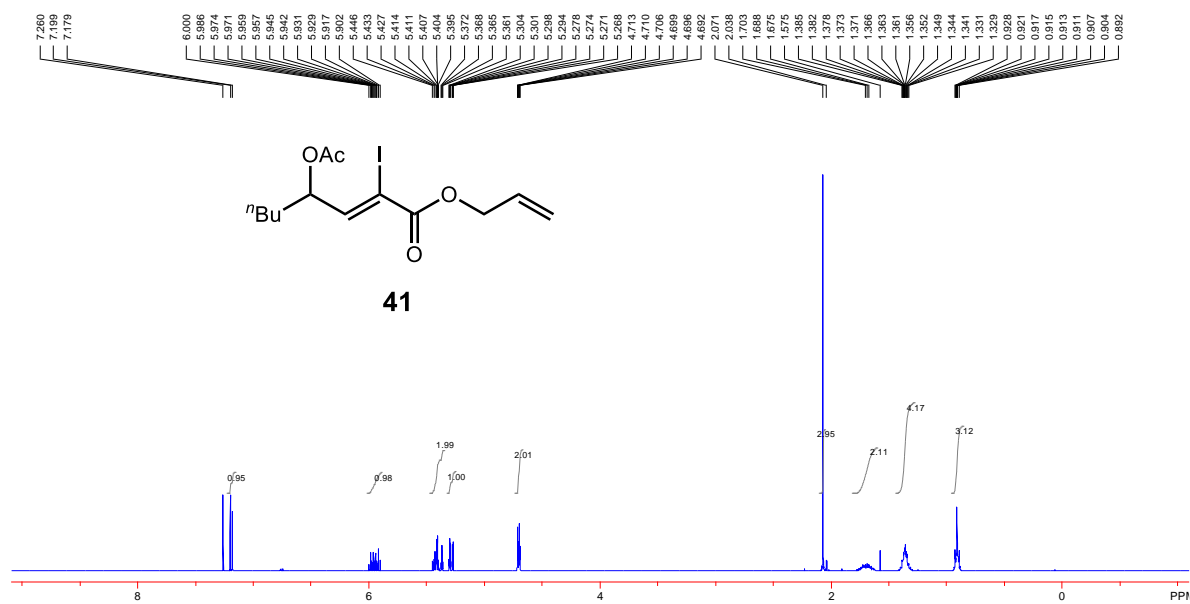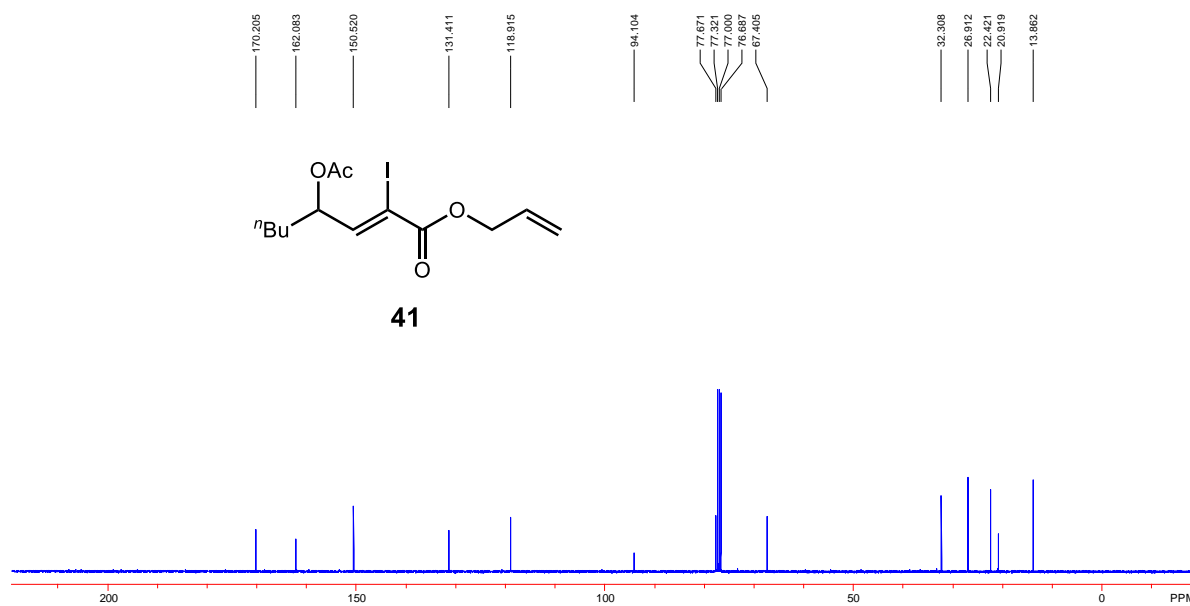

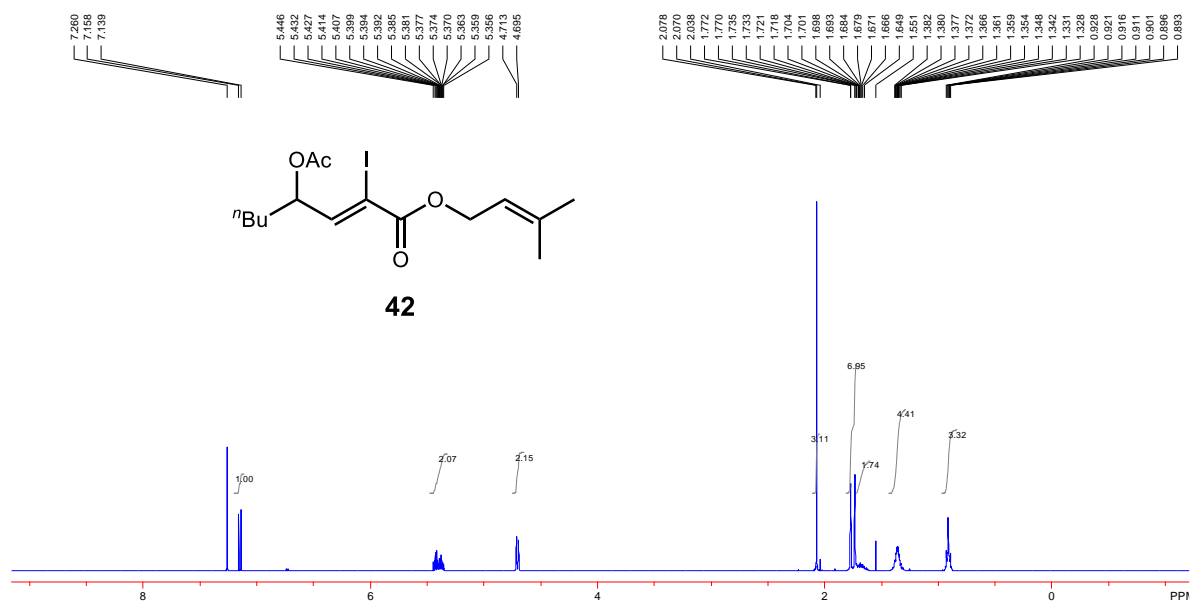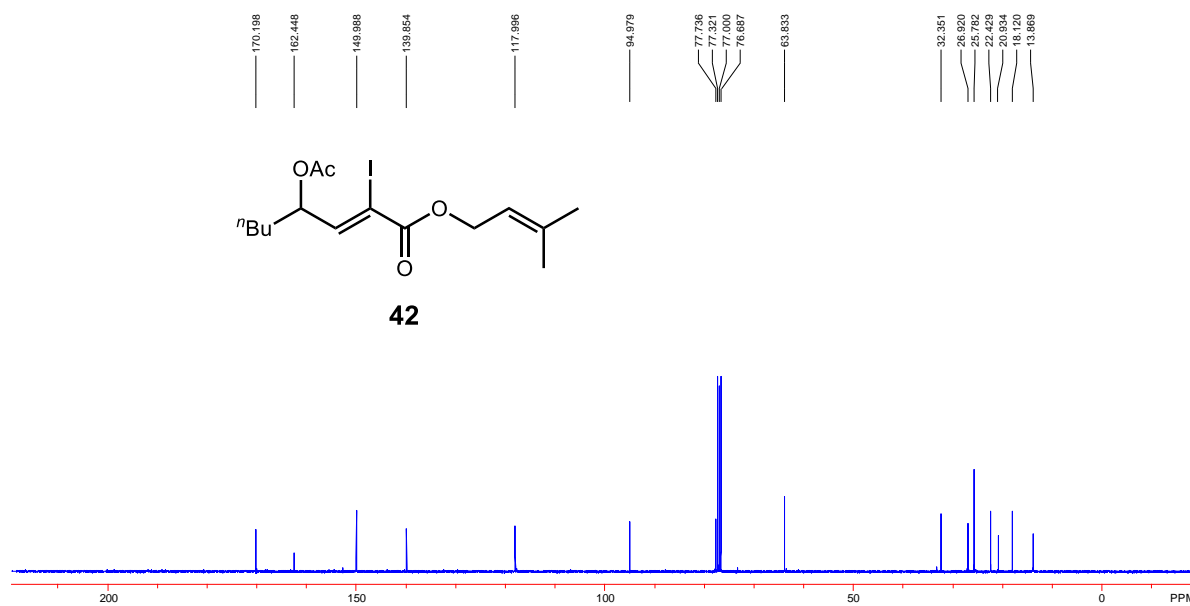



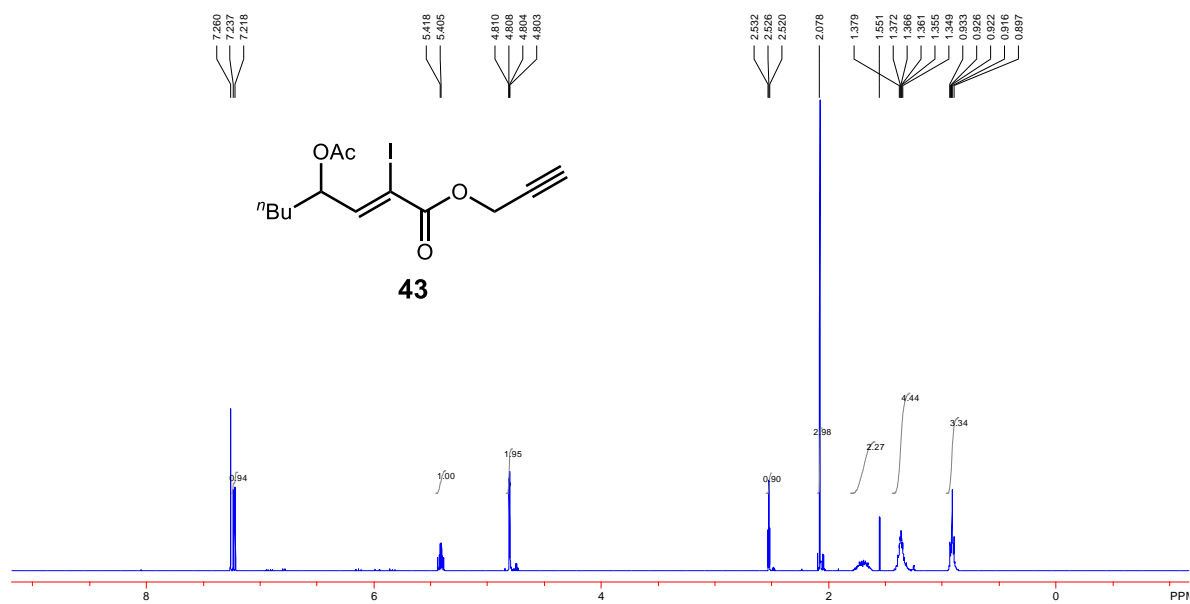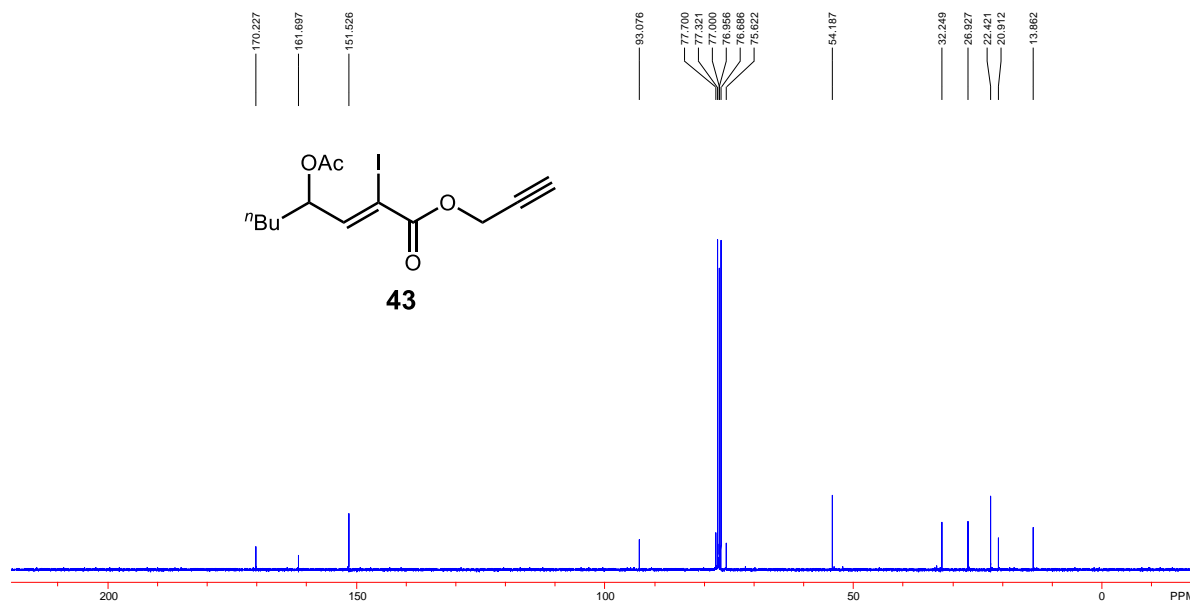

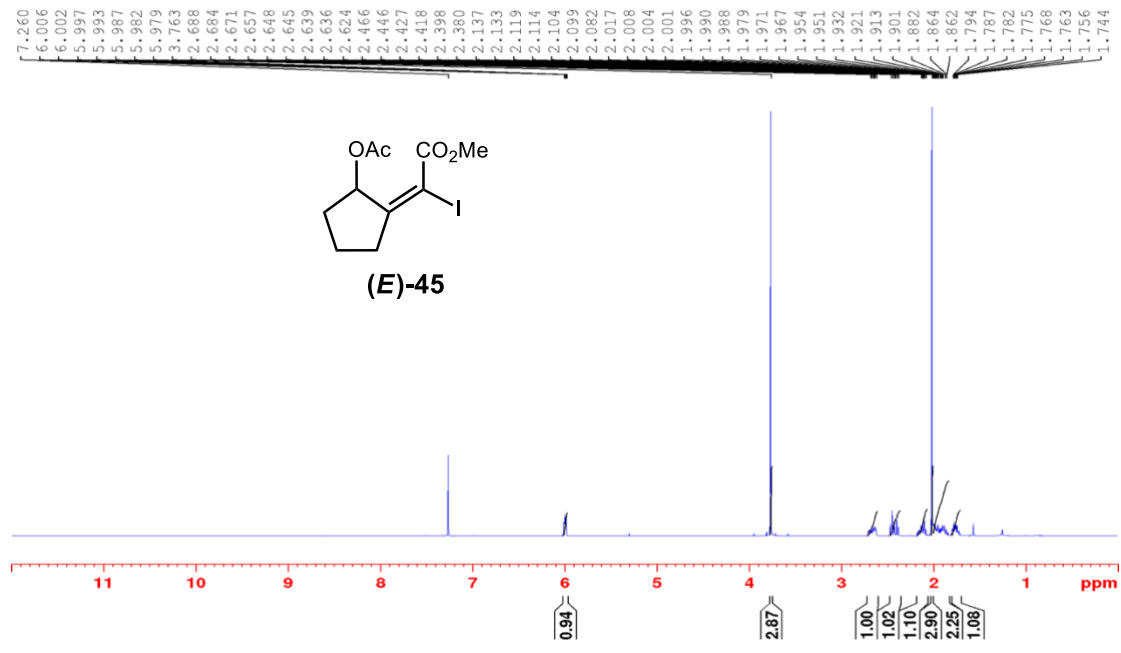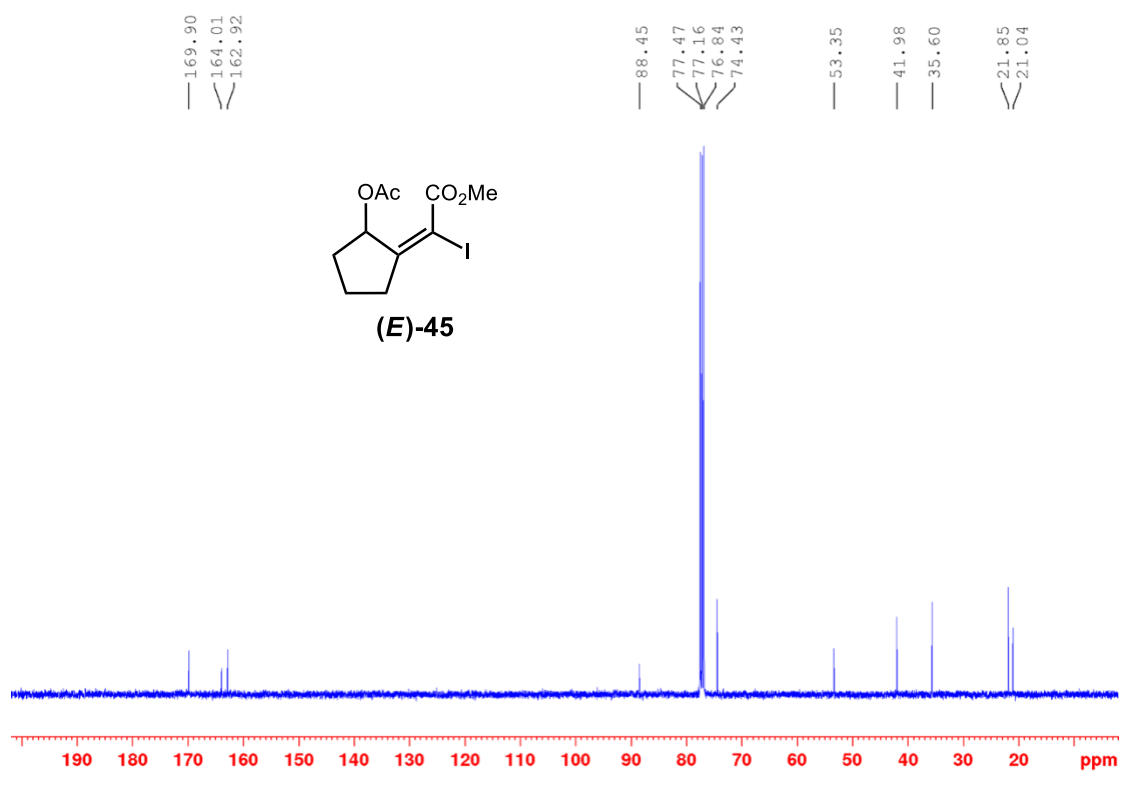

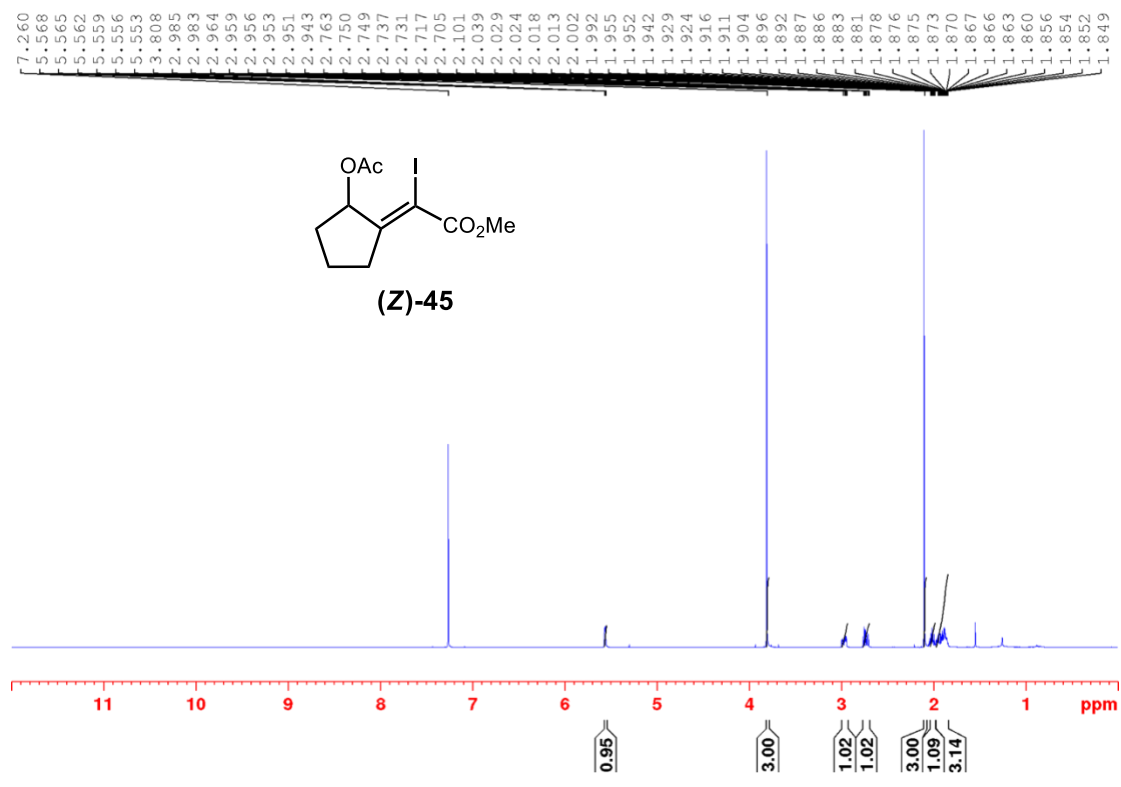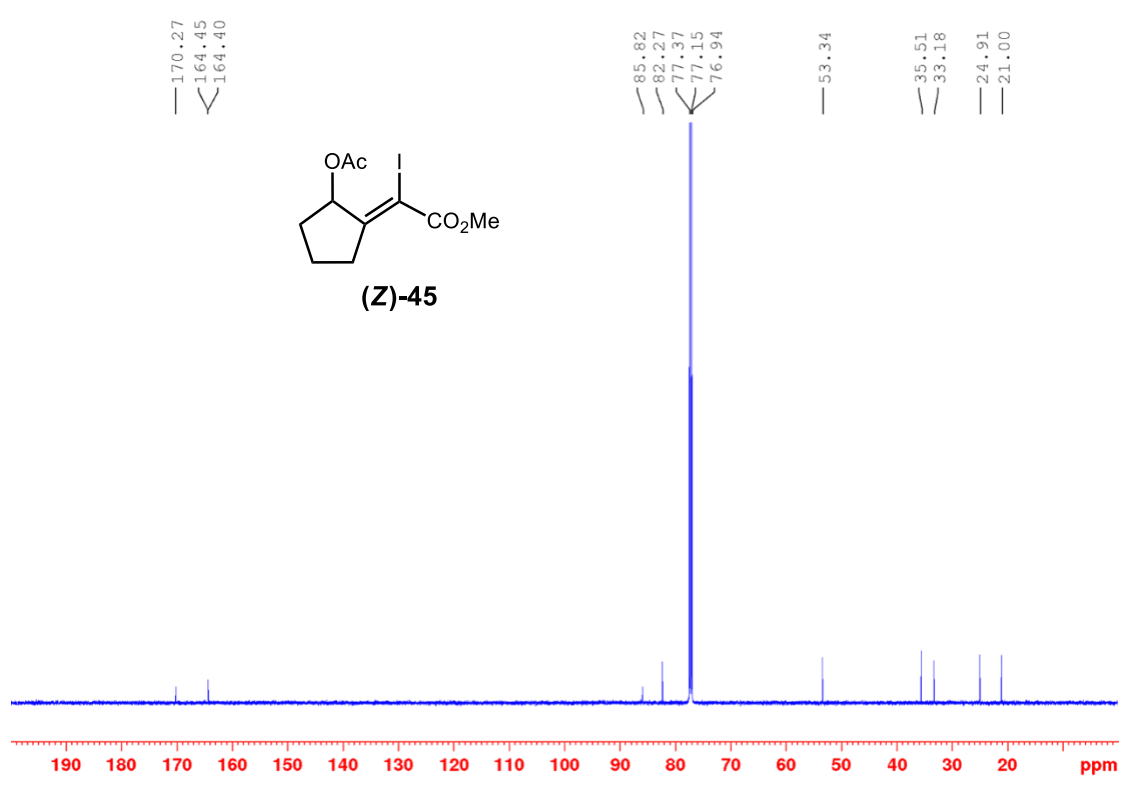

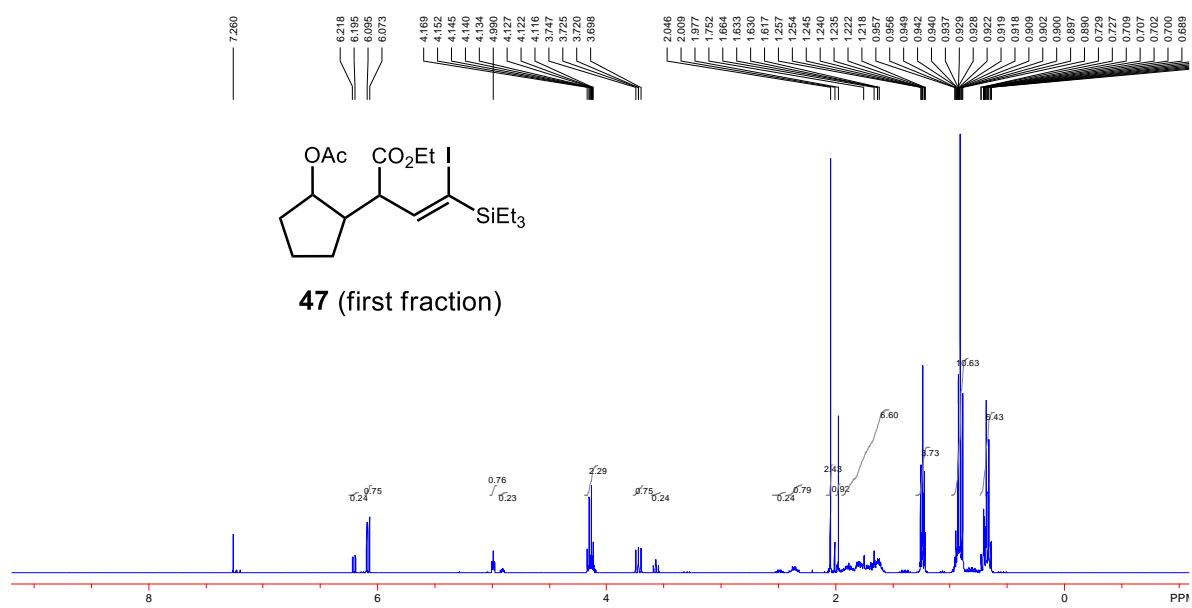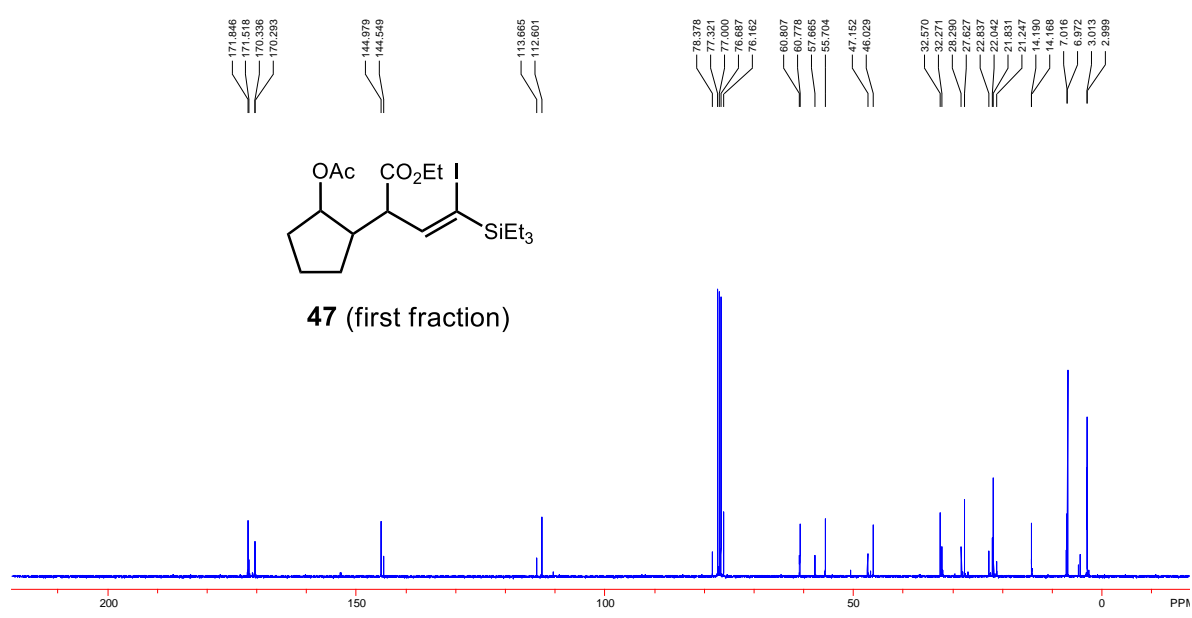

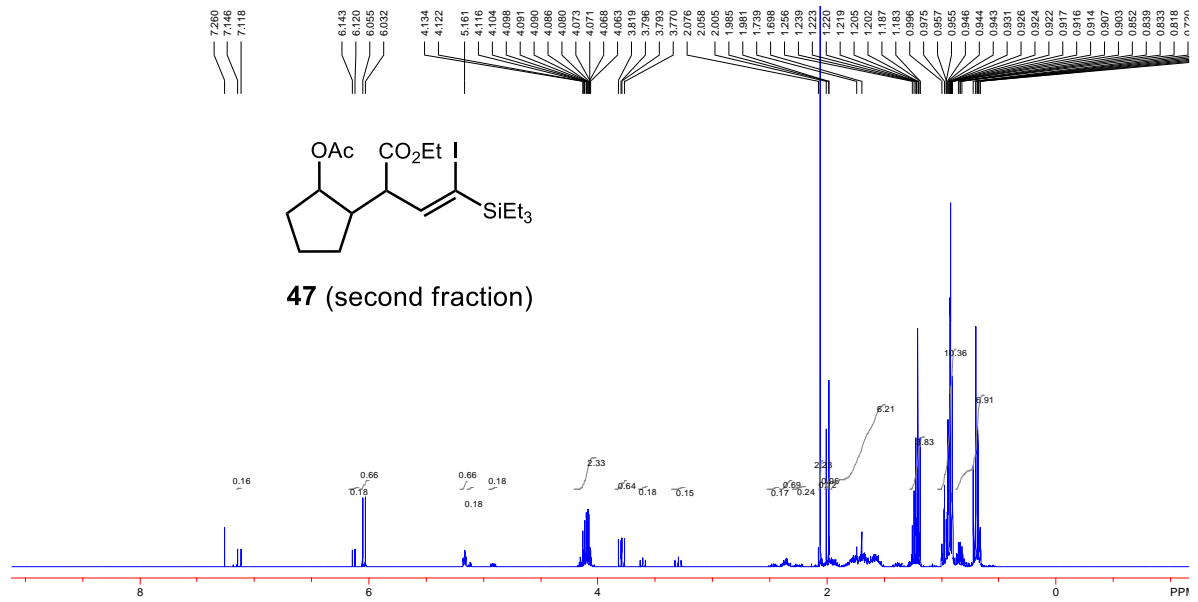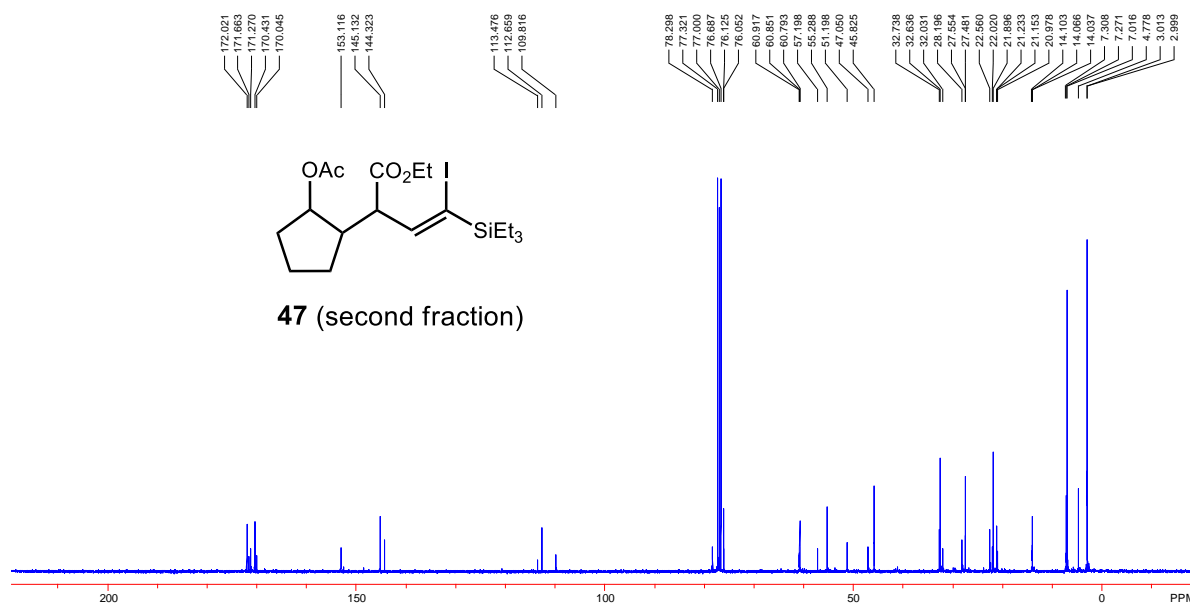

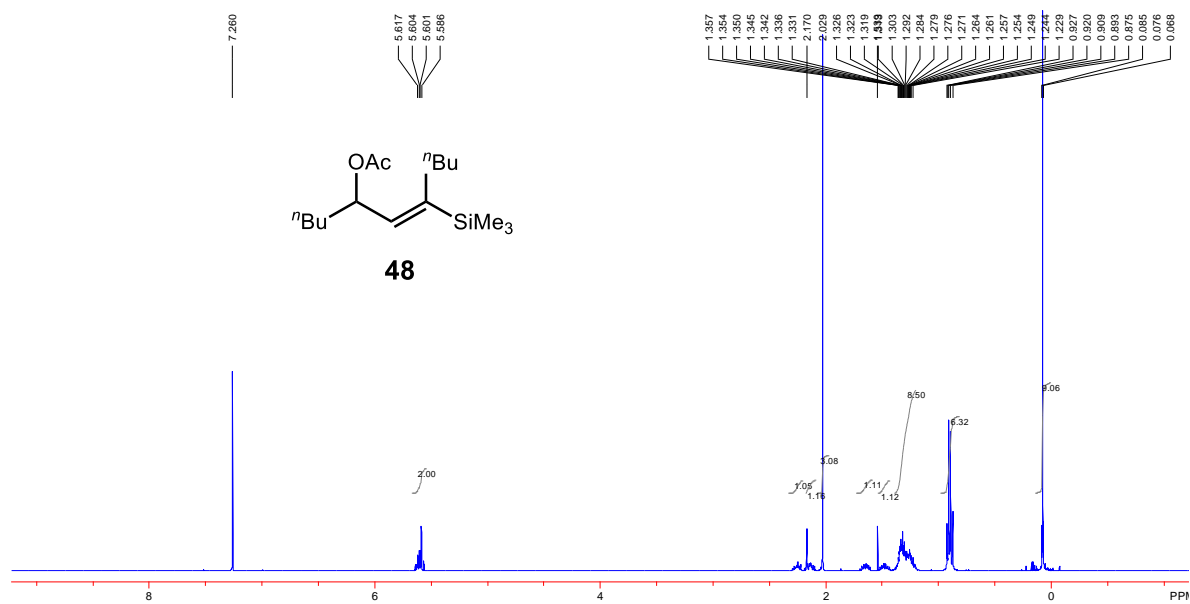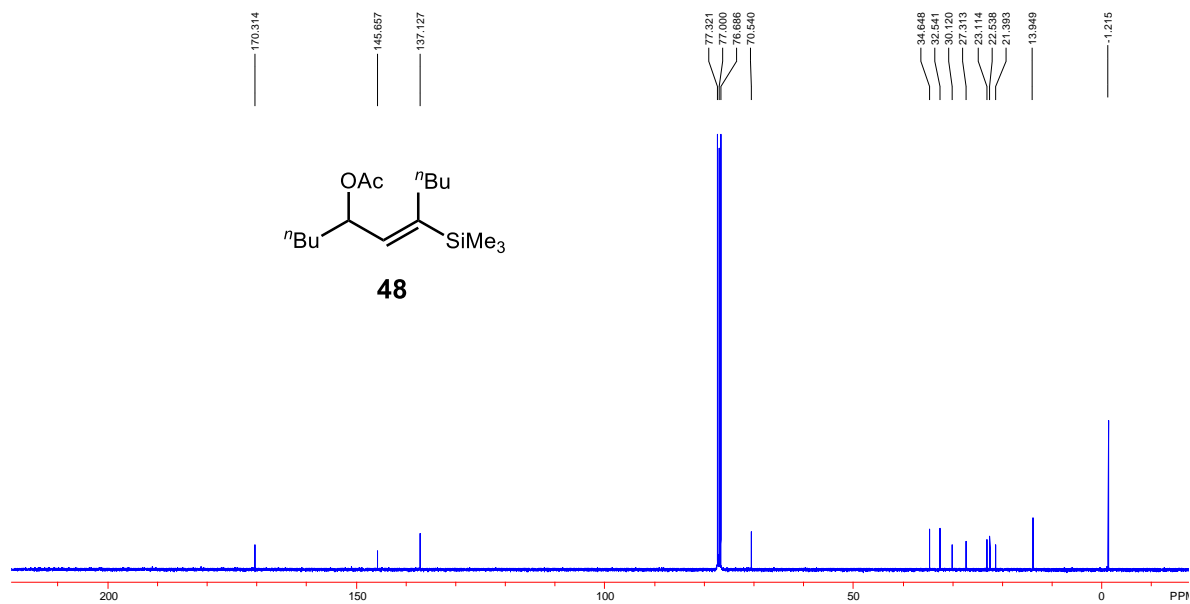

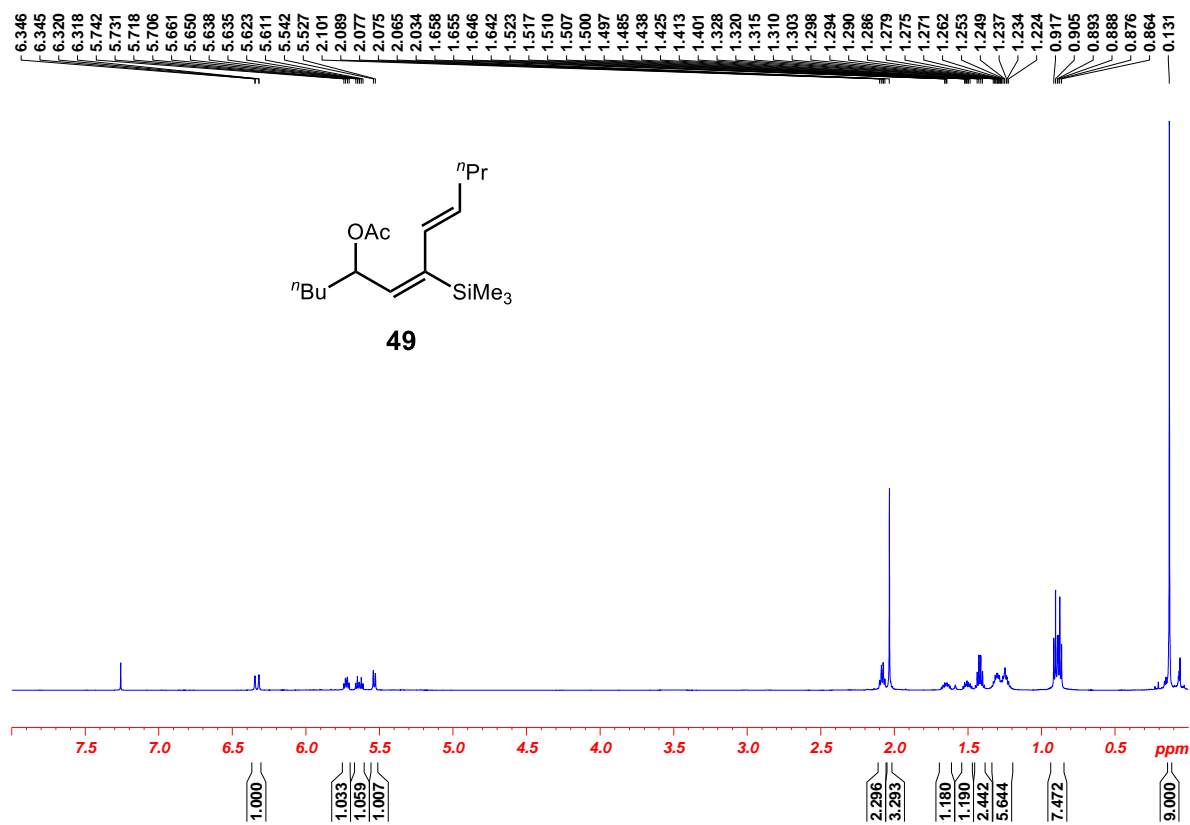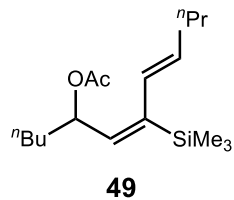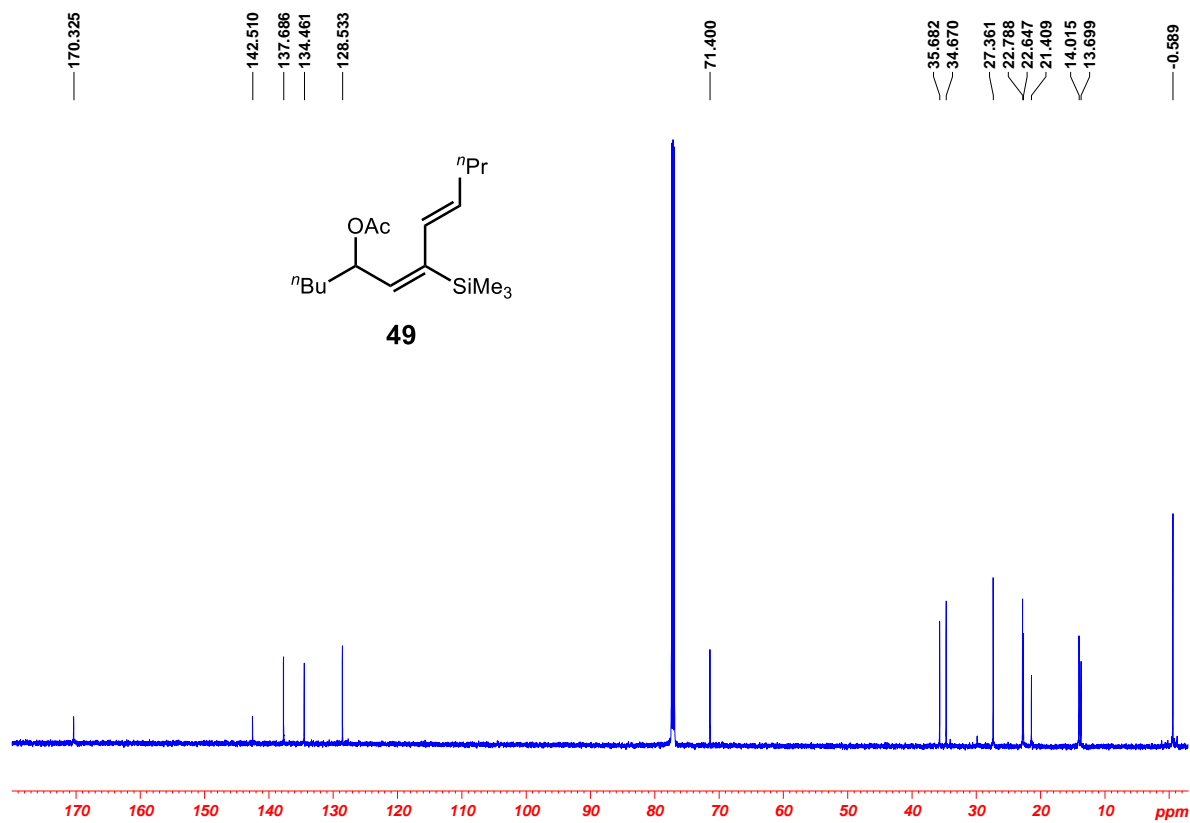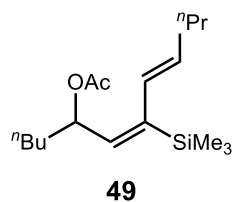

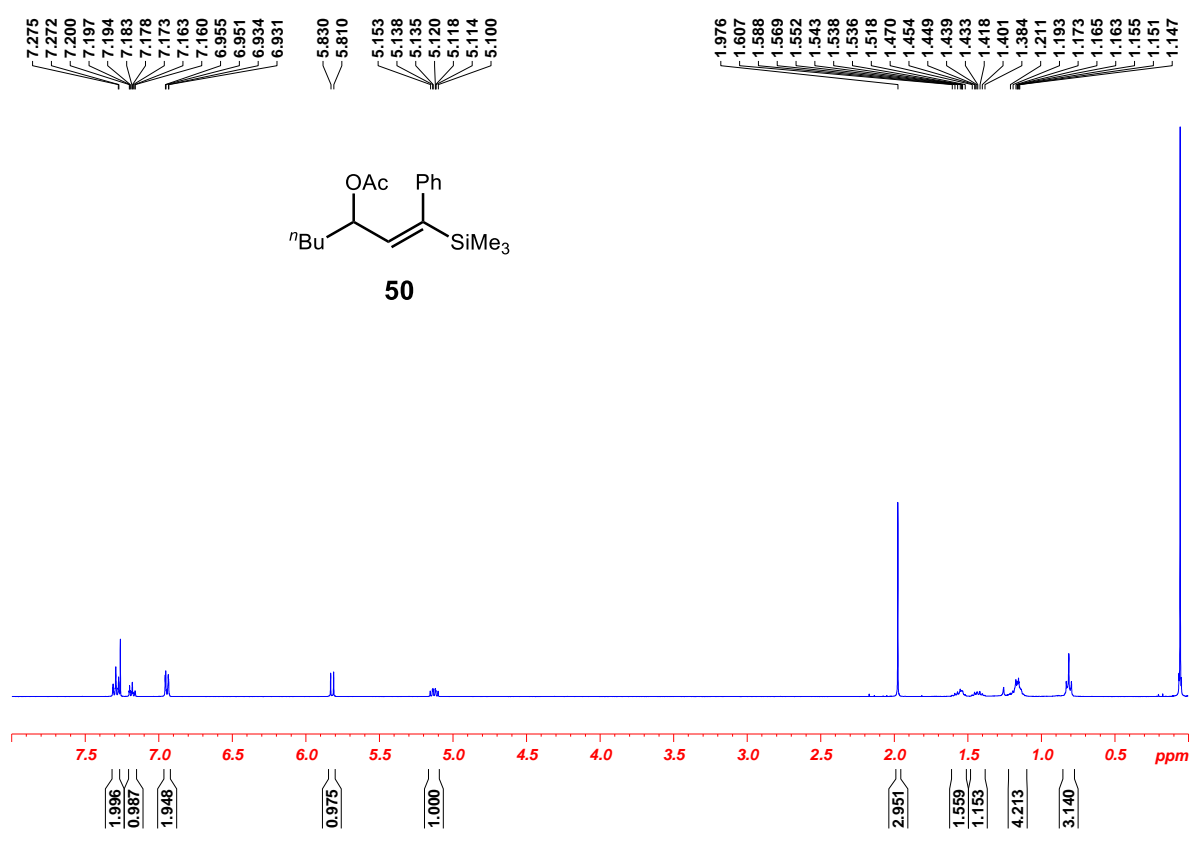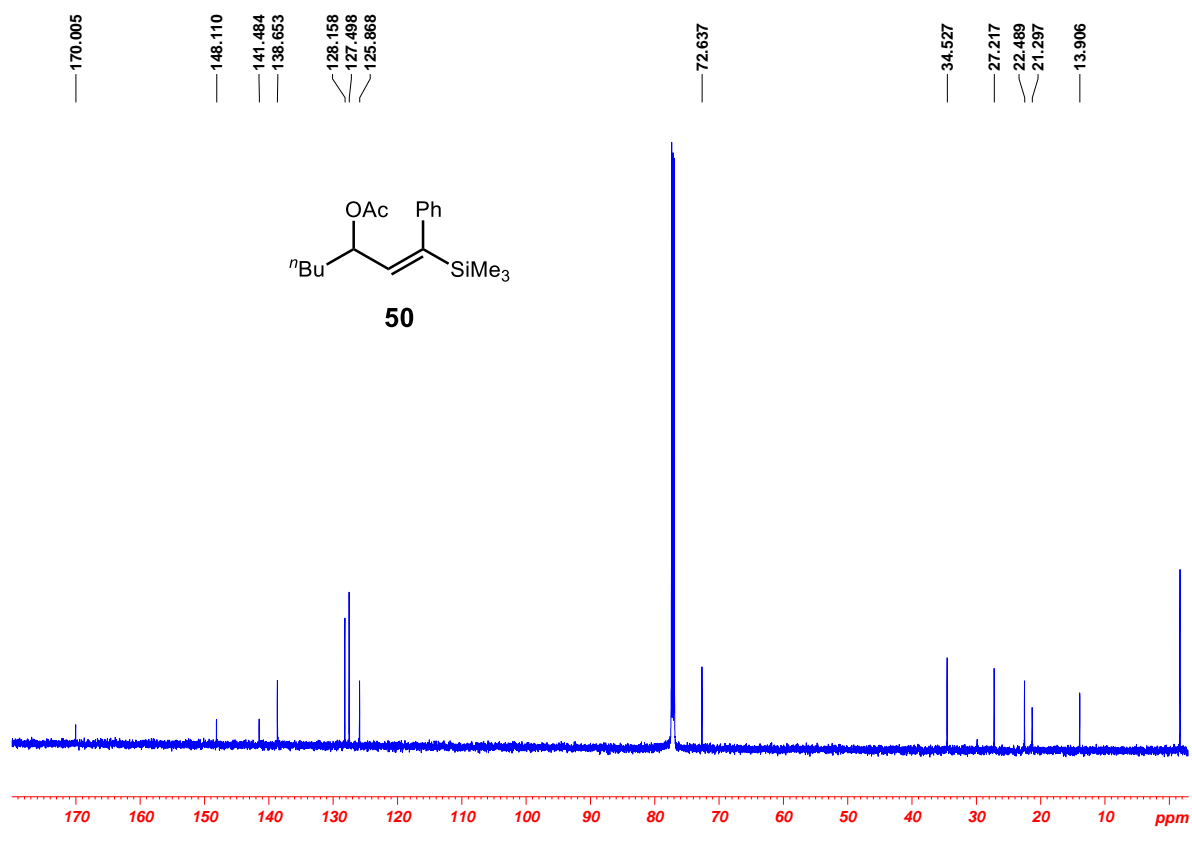



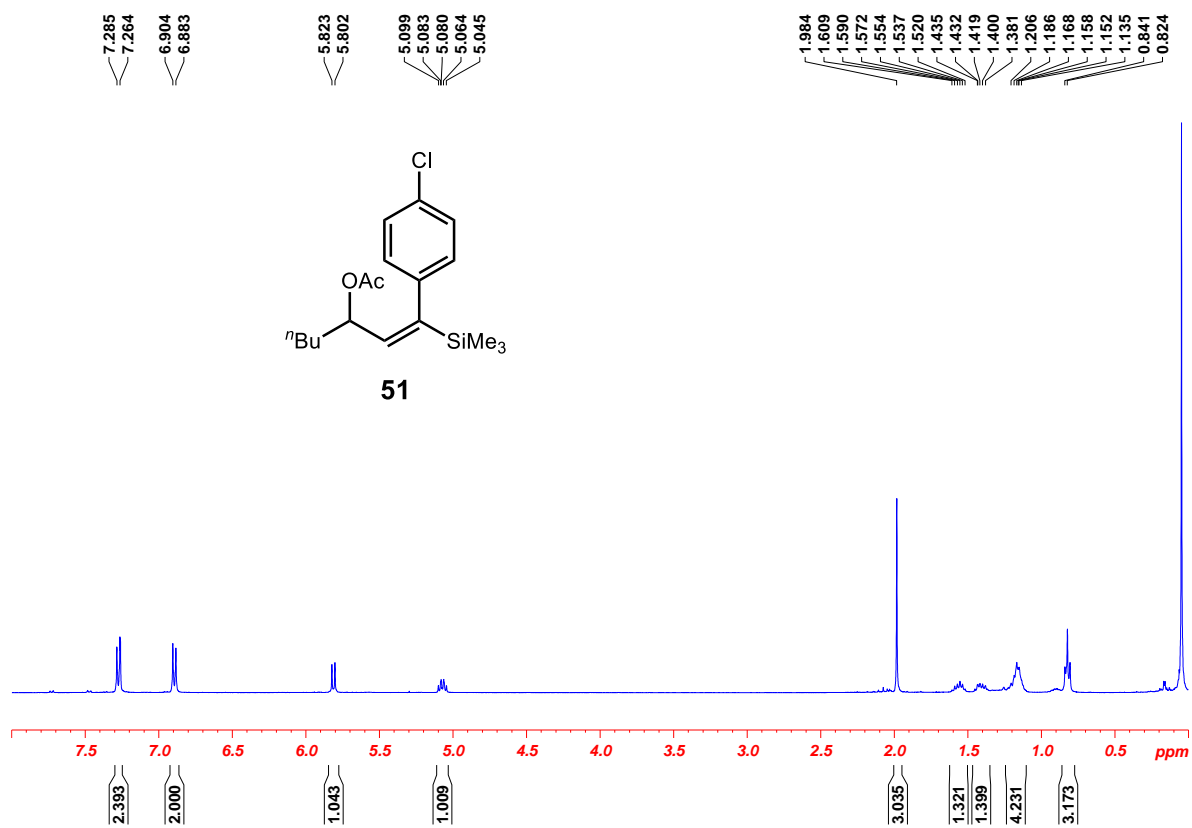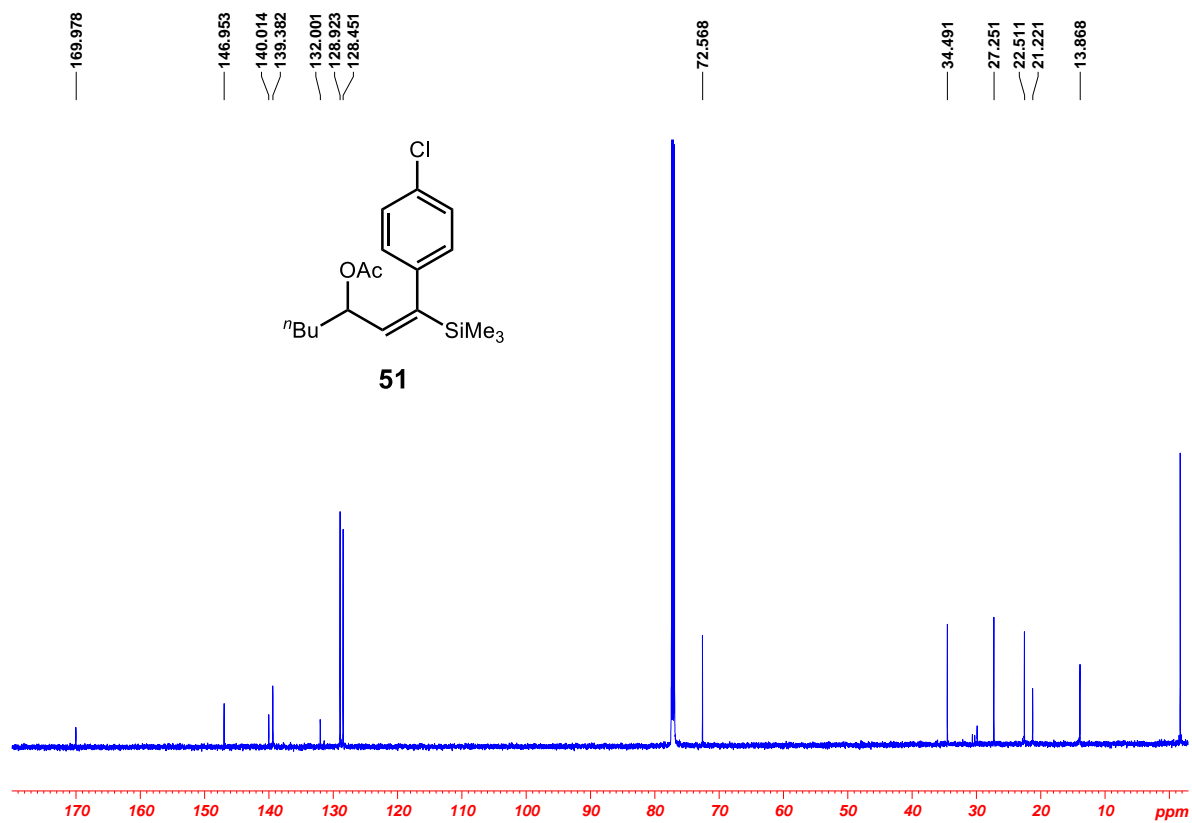

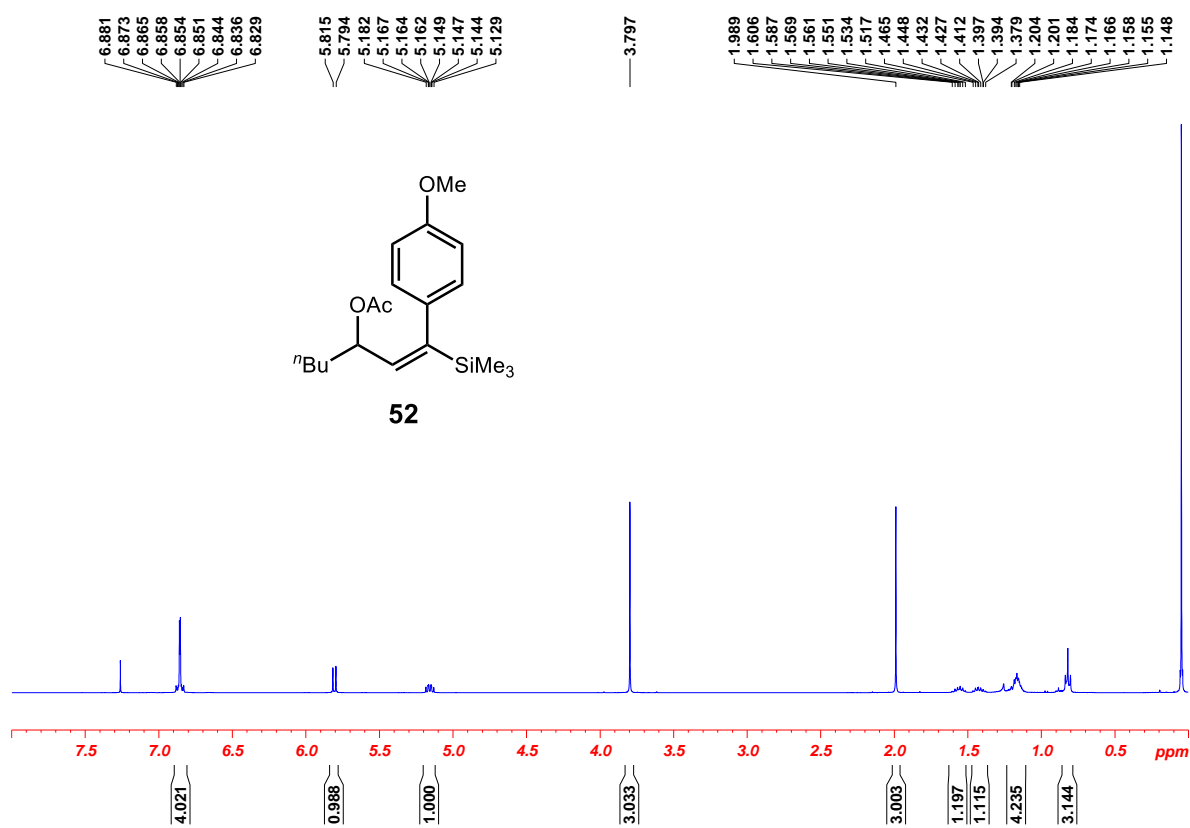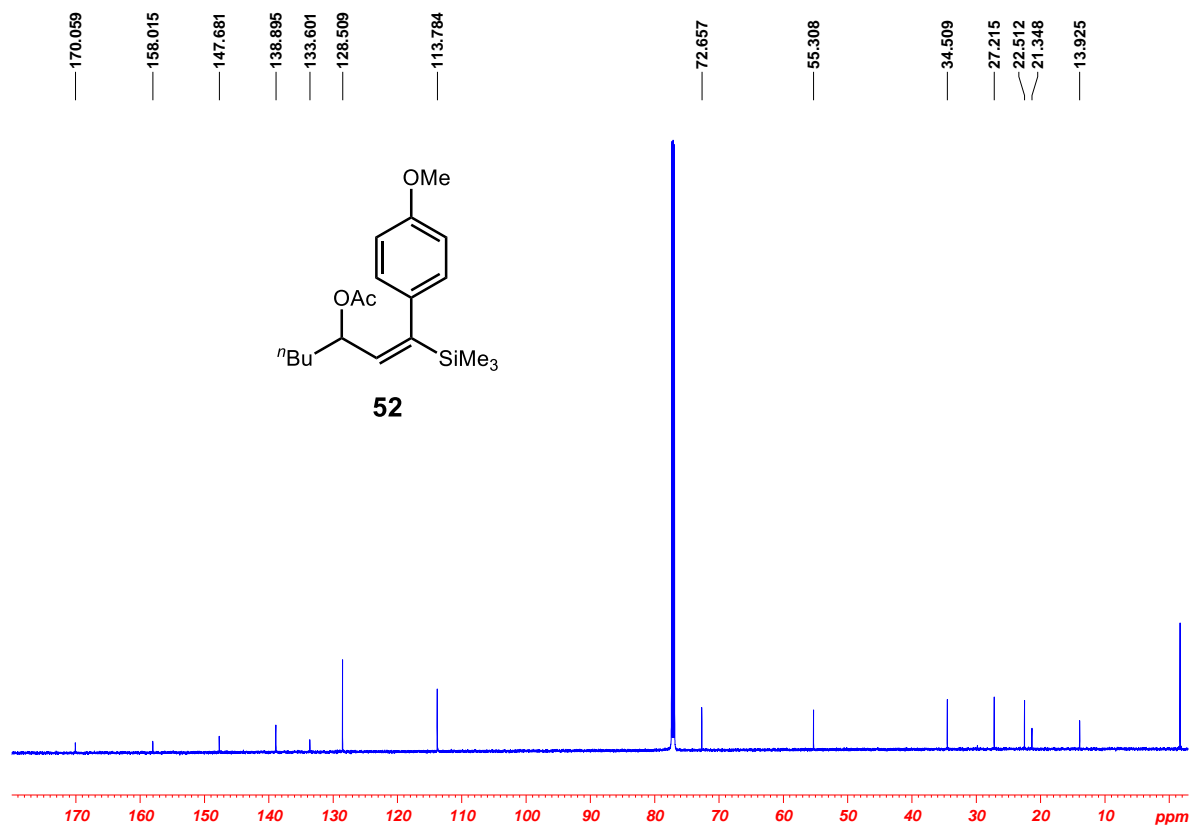

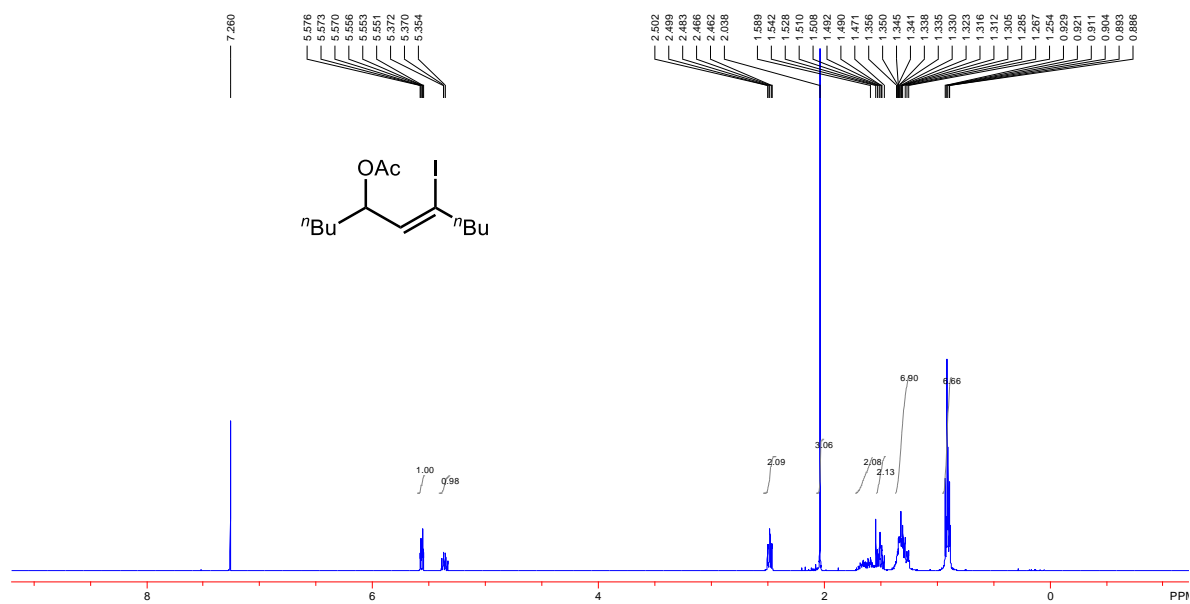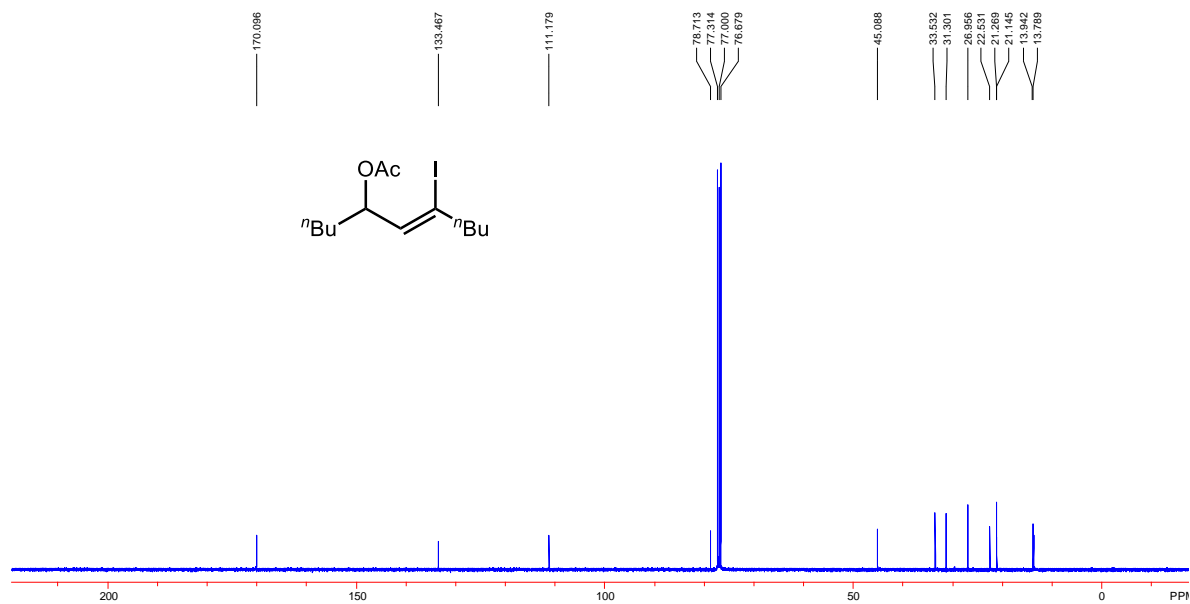

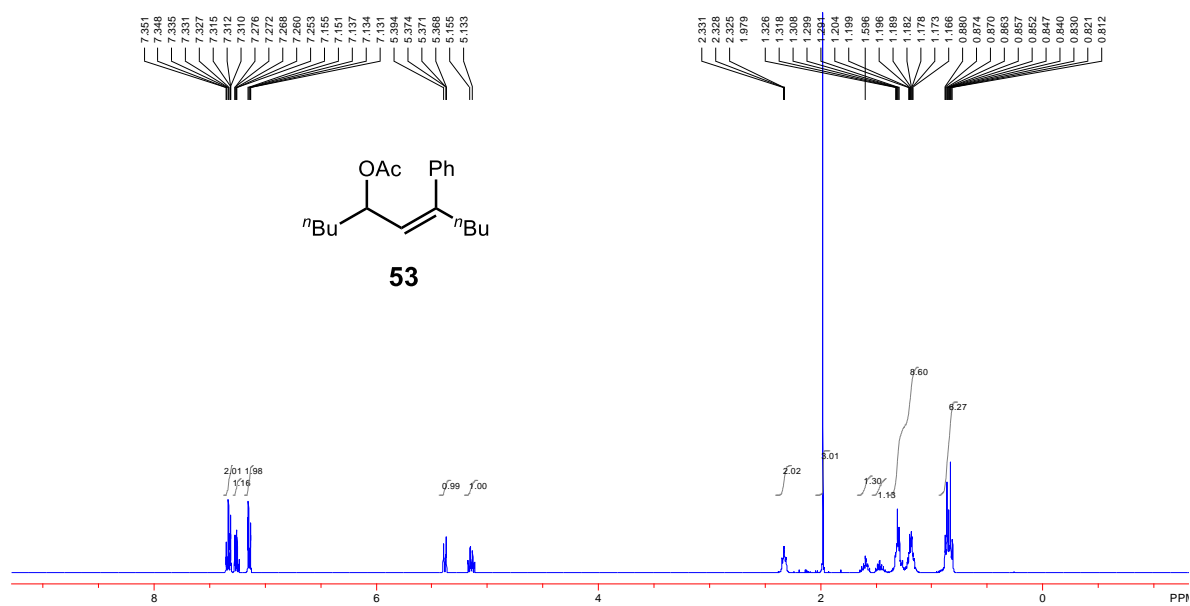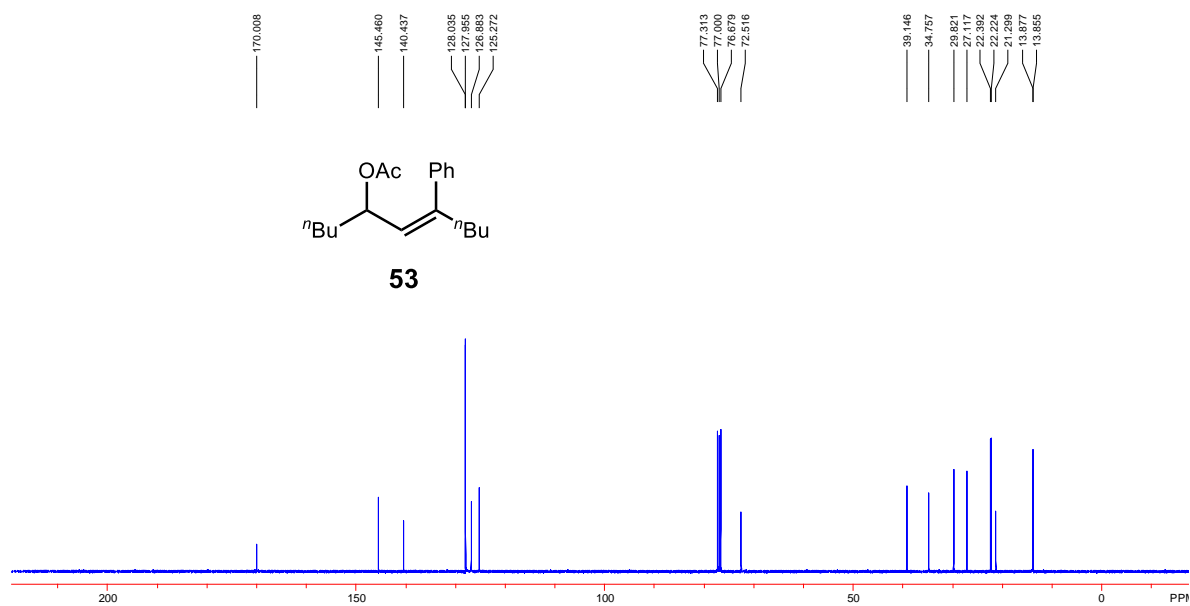

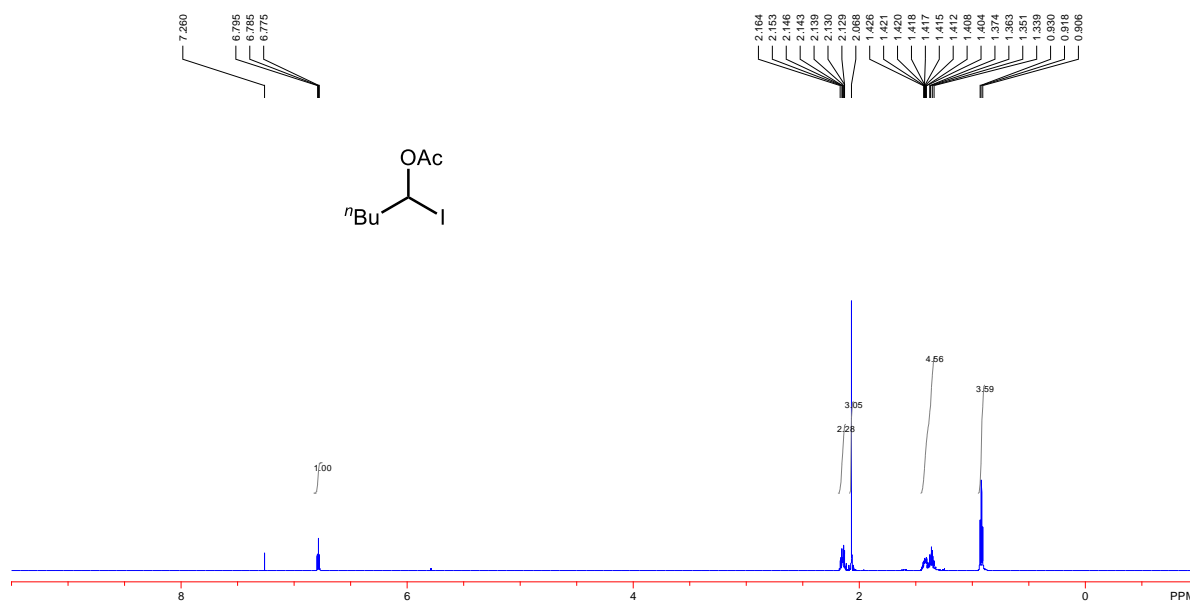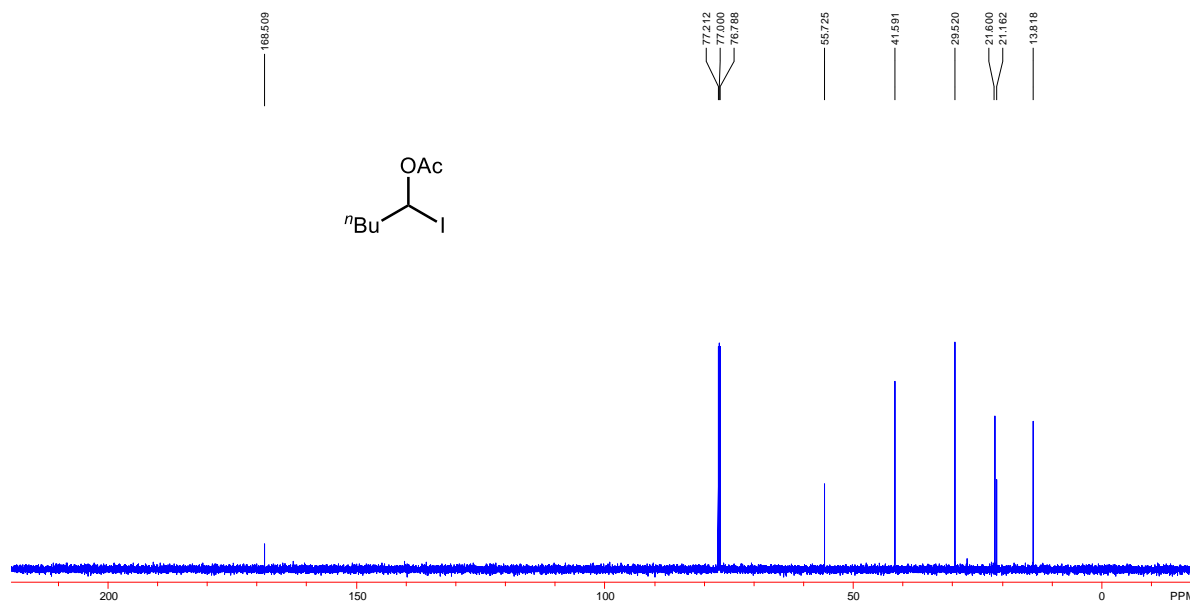

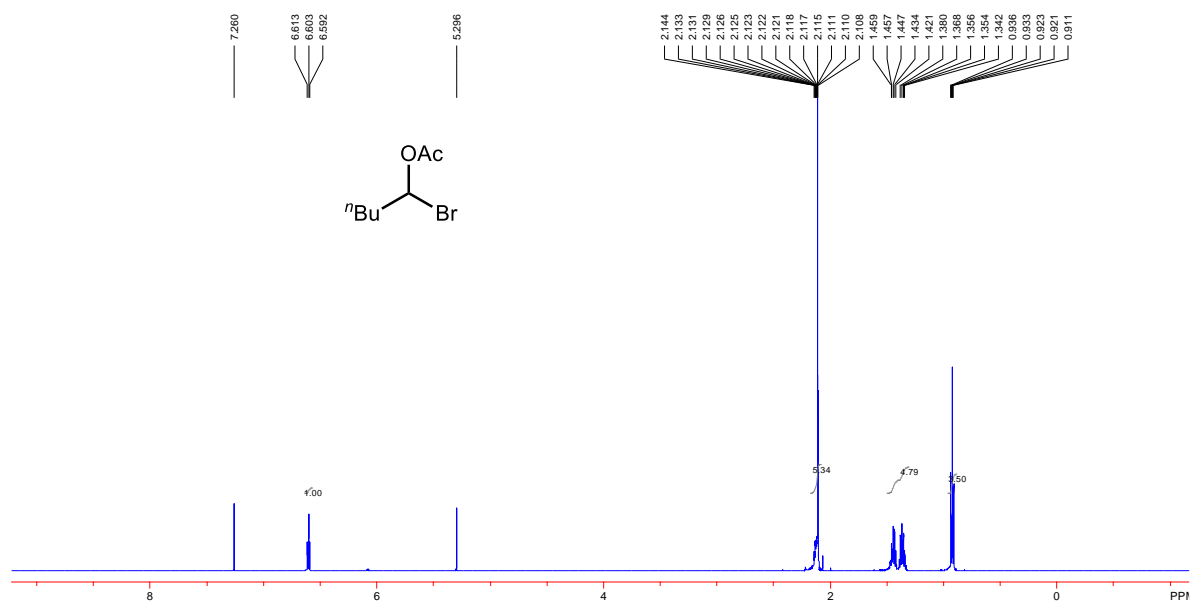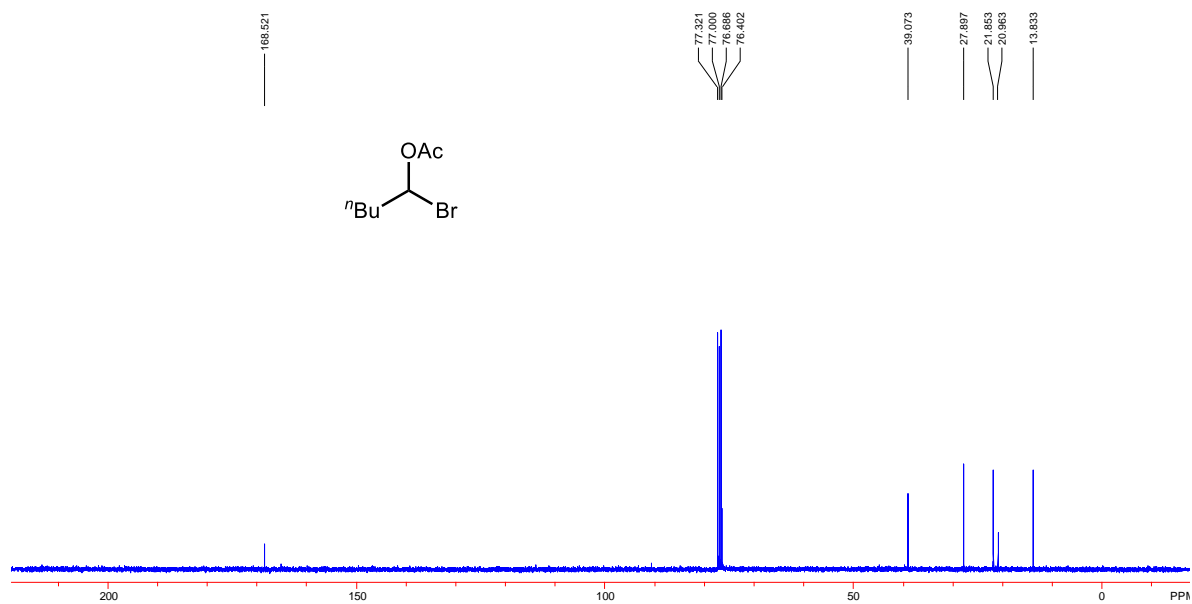

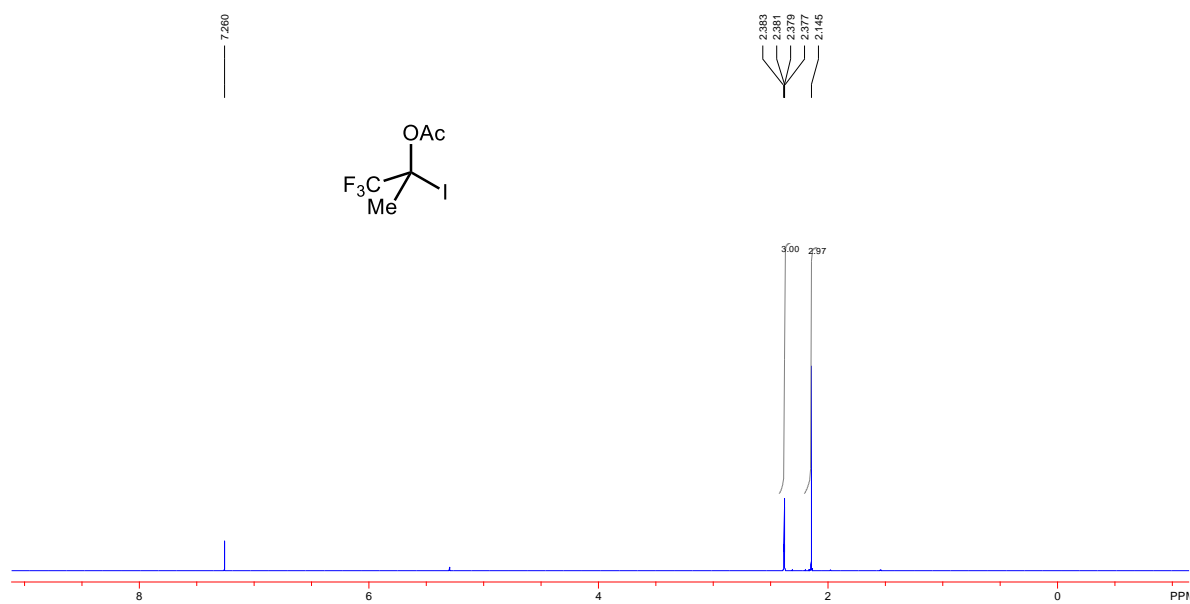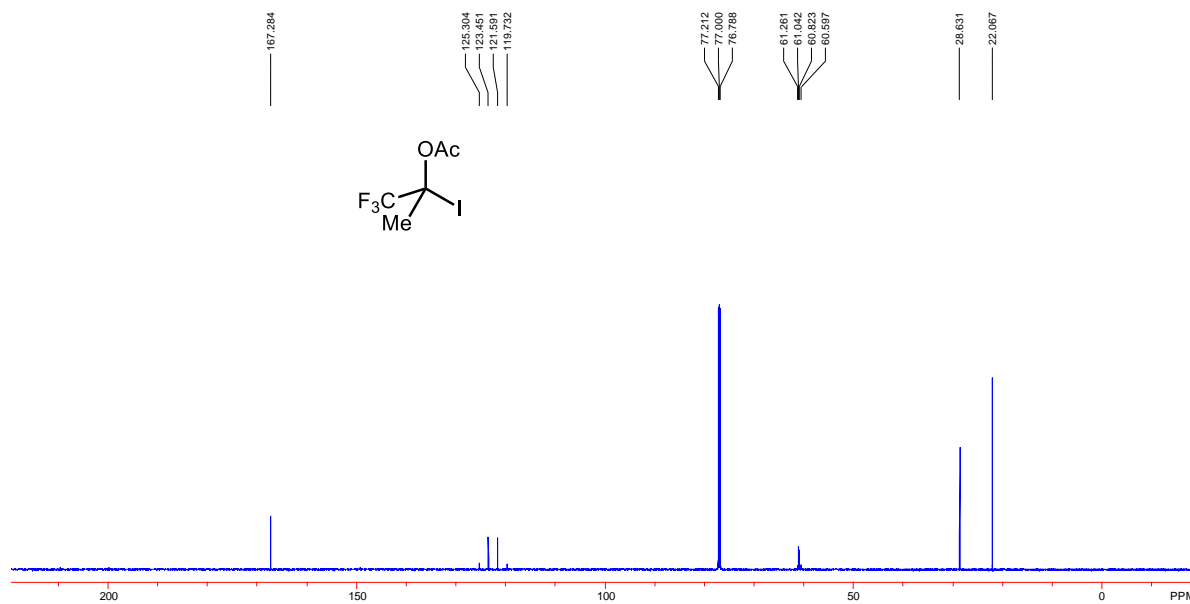

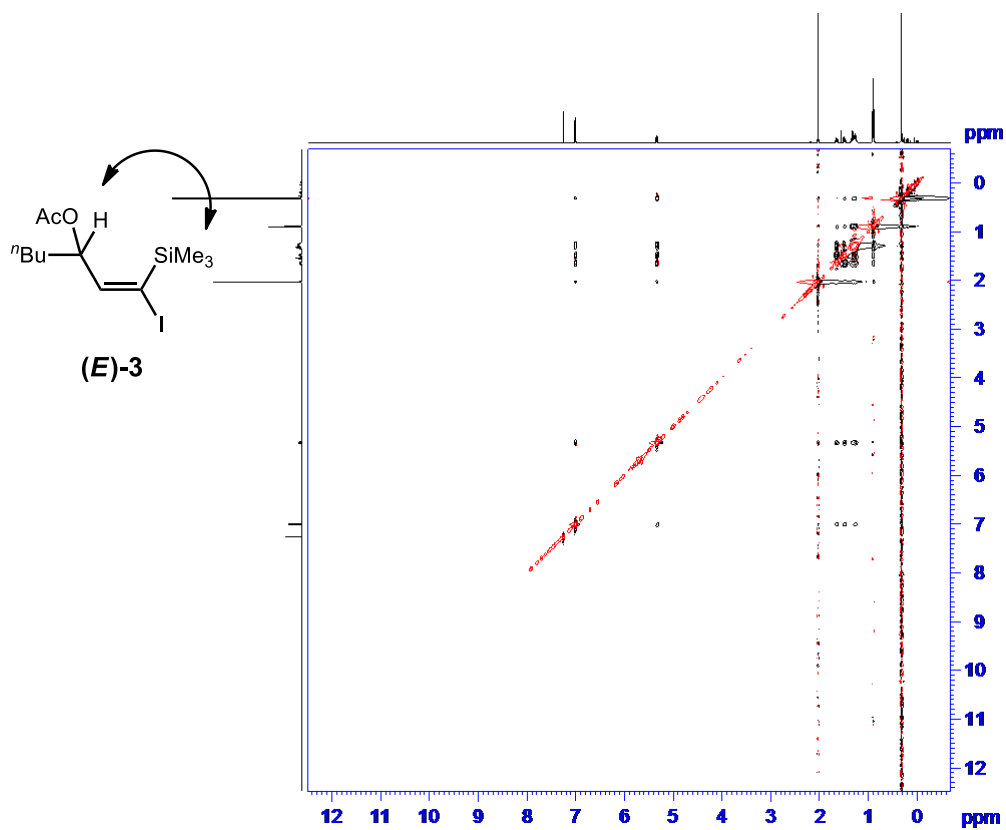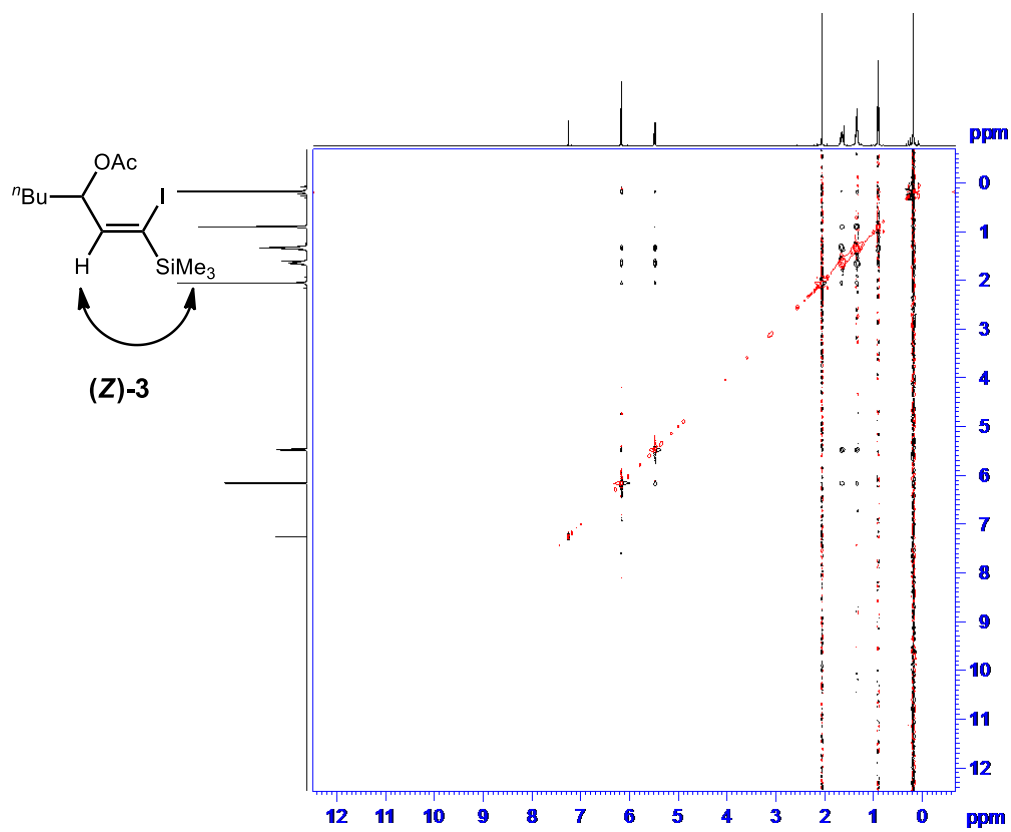



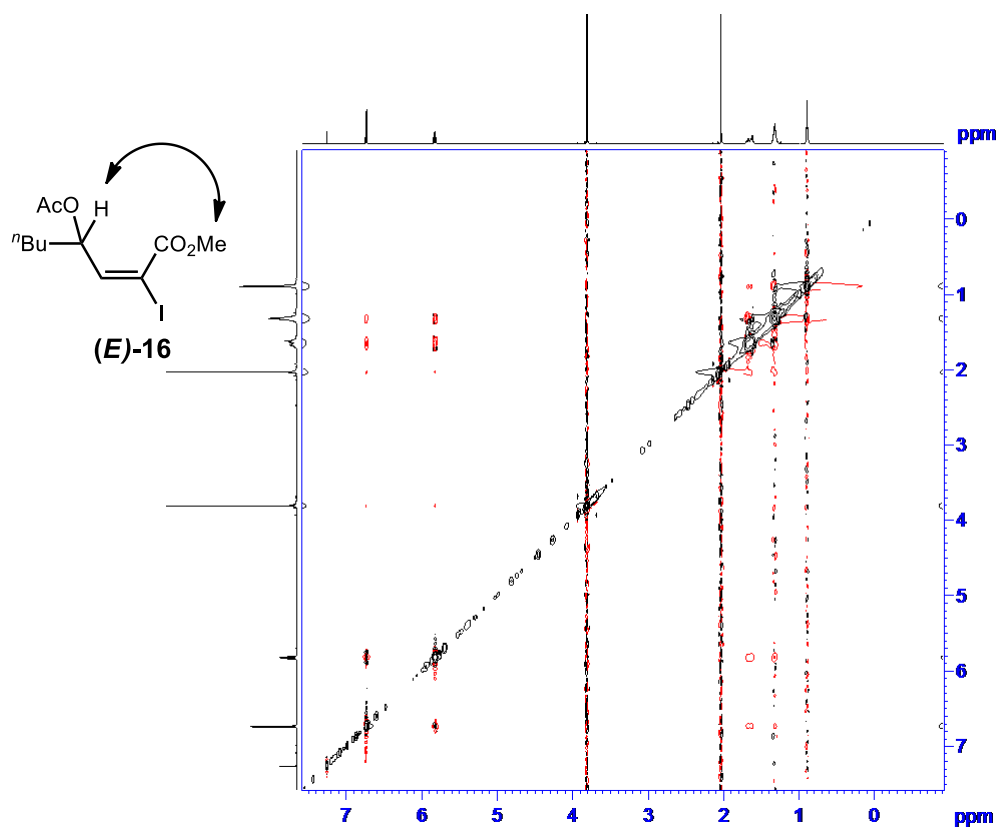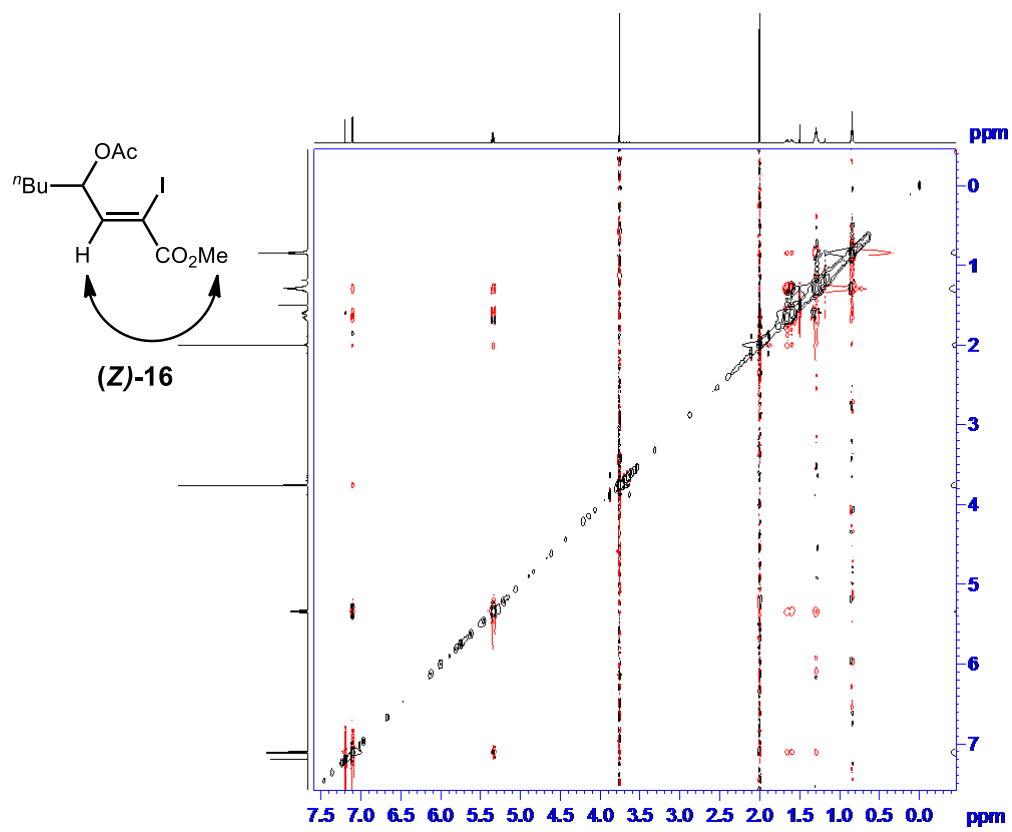

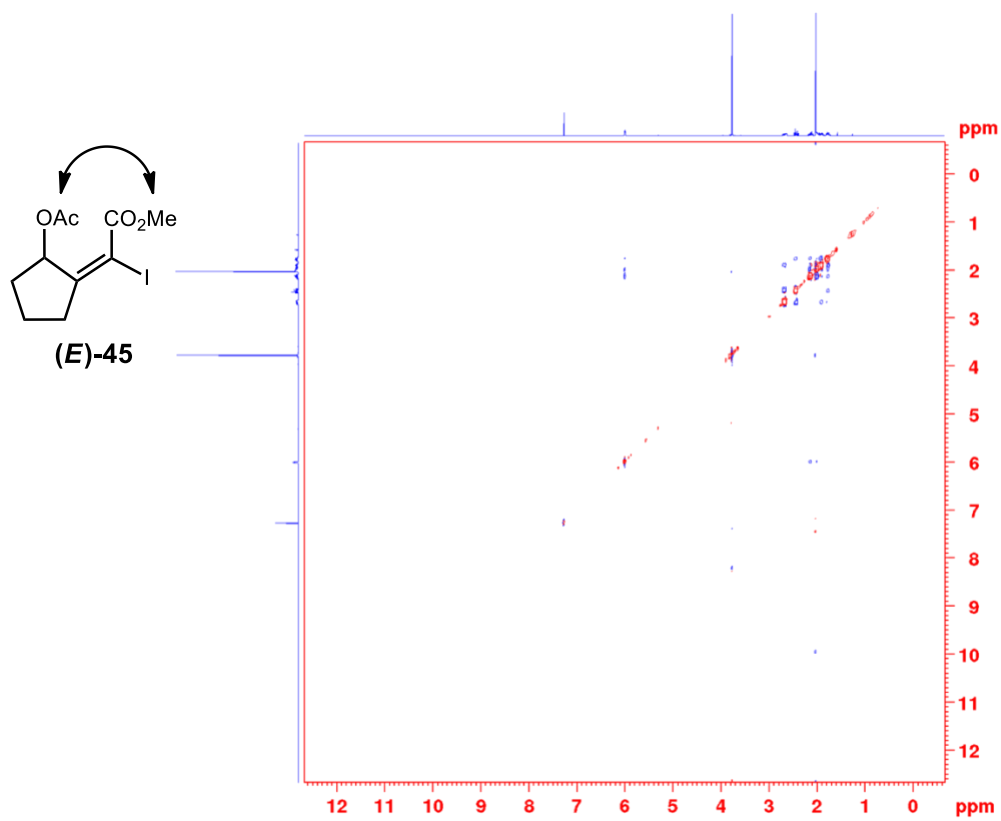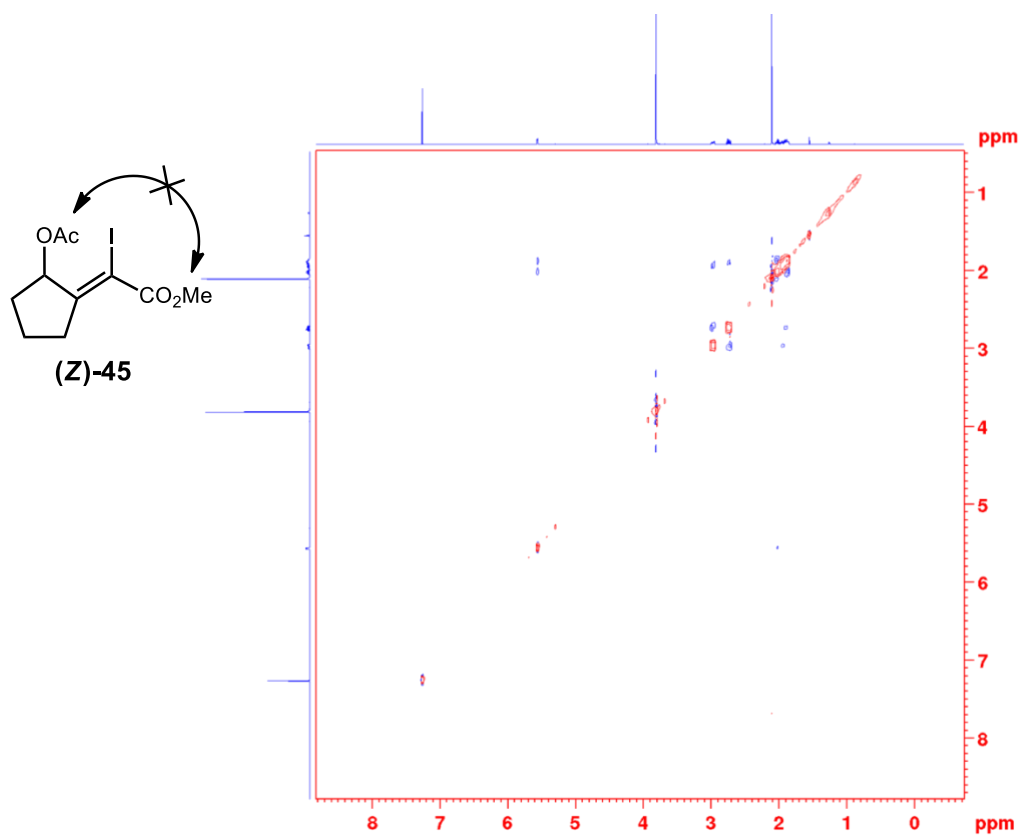

## References

41. J. M. Stevens and D. W. C. MacMillan, *J. Am. Chem. Soc.* **135**, 11756 (2013).
42. G. Giuffredi, C. Bobbio, V. Gouverneur, *J. Org. Chem.* **71**, 5361 (2006).
43. C. S. Barry, N. Bushby, J. R. Harding, C. L. Willis, *Org. Lett.* **7**, 2683 (2005).
44. J. Barluenga, F. González-Bobes, M. C. Murguía, S. R. Ananthoju, J. González, *Chem. Eur. J.* **10**, 4206 (2004).
45. J. P. Marino, H. N. Nguyen, *J. Org. Chem.* **67**, 6291 (2002).
46. Y. Ueda, H. Ito, D. Fujita, M. Fujita, *J. Am. Chem. Soc.* **139**, 6090 (2017).
47. B. Gabriele, L. Veltri, R. Mancuso, C. Carfagna, *Adv. Synth. Catal.* **356**, 2547 (2014).
48. M. Bio, G. Nkepan, Y. You, *Chem. Commun.* **48**, 6517 (2012).
49. M. Huang, Z. Deng, J. Tian, T. Liu, *Eur J Med Chem.* **127**, 900 (2016).
50. A. K. Jha, H. Inani, S. Easwar, *Synlett* **28**, 1473 (2017).
51. L. Feray, M. P. Bertrand, *Eur. J. Org. Chem.* 3164 (2008).
52. V. Bilinski, A. S. Dreiding, *Helv. Chim. Acta* **66**, 2322 (1983).
53. A. J. Cresswell, S. G. Davies, A. L. A. Figuccia, A. M. Fletcher, D. Heijnen, J. A. Lee, M. J. Morris, A. M. R. Kennett, P. M. Roberts, J. E. Thomson, *Tetrahedron Lett.* **56**, 3373 (2015).
54. R. A. Oliveira, R. O. Silva, G. A. Molander, P. H. Menezes, *Magn. Reson. Chem.* **47**, 873 (2009).
55. H. Kinoshita, H. Takahashi, K. Miura, *Org. Lett.* **15**, 2962 (2013).
56. V. K. Yadav, K. G. Babu, *J. Org. Chem.* **69**, 577 (2004).
57. K. K. H. Vong, S. Maeda, K. Tanaka, *Chem. Eur. J.* **22**, 18865 (2016).
58. S. Kim, C. H. Oh, J. S. Ko, K. H. Ahn, Y. J. Kim, *J. Org. Chem.* **50**, 1927 (1985).
59. G. Zou, K. Reddy, J. R. Falck, *Tetrahedron Lett.* **42**, 7213 (2001).
60. D. P. Stamos, A. G. Taylor, Y. Kishi, *Tetrahedron Lett.* **37**, 8647 (1996).
